# Supplementary material for: Make Friends With The Googlebot
Source: eLife journal article supplement (doi:10.7554/elife.65998), 2005-03-14
Supplement: supp [file elife-65998-supp-v1.zip]

Archive with 31 entries (31 files):
- elife_poa_e65998_Transparent_Reporting_File.pdf
- elife_poa_e65998_Figure_2_figure_supplement_1.pdf
- elife_poa_e65998_Figure_2_figure_supplement_2.pdf
- elife_poa_e65998_Figure_3_figure_supplement_1.pdf
- elife_poa_e65998_Figure_3_figure_supplement_2.pdf
- elife_poa_e65998_Figure_4_figure_supplement_1.pdf
- elife_poa_e65998_Figure_4_figure_supplement_2.pdf
- elife_poa_e65998_Figure_5_figure_supplement_1.pdf
- elife_poa_e65998_Figure_5_figure_supplement_2.pdf
- elife_poa_e65998_Figure_6_figure_supplement_1.pdf
- elife_poa_e65998_Figure_6_figure_supplement_2.pdf
- elife_poa_e65998_Figure_2_source_data_1.csv
- elife_poa_e65998_Figure_2_source_data_2.csv
- elife_poa_e65998_Figure_3_figure_supplement_2_source_data_1.csv
- elife_poa_e65998_Figure_3_source_data_1.csv
- elife_poa_e65998_Figure_3_source_data_2.csv
- elife_poa_e65998_Figure_3_source_data_3.csv
- elife_poa_e65998_Figure_3_source_data_4.csv
- elife_poa_e65998_Figure_4_figure_supplement_2_source_data_1.csv
- elife_poa_e65998_Figure_4_source_data_1.csv
- elife_poa_e65998_Figure_4_source_data_2.csv
- elife_poa_e65998_Figure_4_source_data_3.csv
- elife_poa_e65998_Figure_4_source_data_4.csv
- elife_poa_e65998_Figure_5_figure_supplement_1_source_data_1.csv
- elife_poa_e65998_Figure_5_source_data_1.csv
- elife_poa_e65998_Figure_5_source_data_2.csv
- elife_poa_e65998_Figure_6_figure_supplement_2_source_data_1.csv
- elife_poa_e65998_Figure_6_source_data_1.csv
- elife_poa_e65998_Figure_6_source_data_2.csv
- elife_poa_e65998_Figure_6_source_data_3.csv
- elife_poa_e65998_Figure_6_source_data_4.csv
