# Supplementary material for: Make Friends With The Googlebot
Source: eLife journal article supplement (doi:10.7554/elife.65998), 2005-03-14
Supplement: supp [file elife-65998-supp-v1.zip › elife_poa_e65998_Figure_2_figure_supplement_2.pdf]

Figure 2—figure supplement 2: Optical fibre implant placement

A

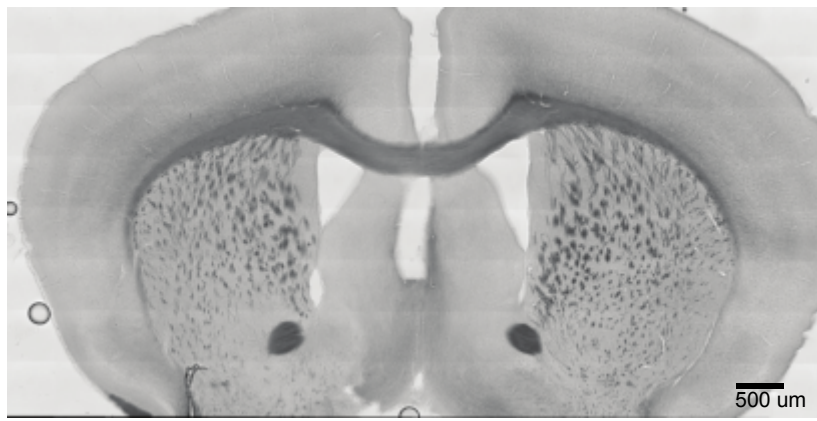

B ChAT-Ai32

AP: 0.98

AP: 0.74

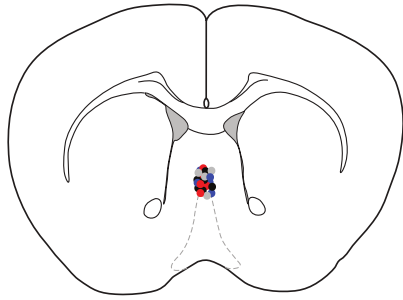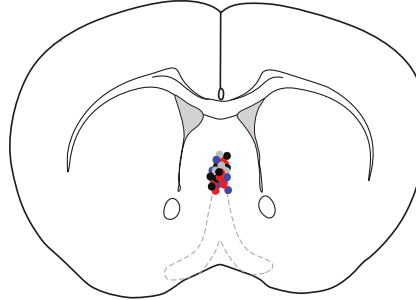

- No stim (n=13)
- Goal (n=15)
- Throughout maze (n=9)
- Navigation (n=9)

WT

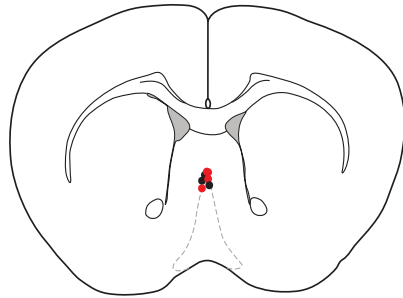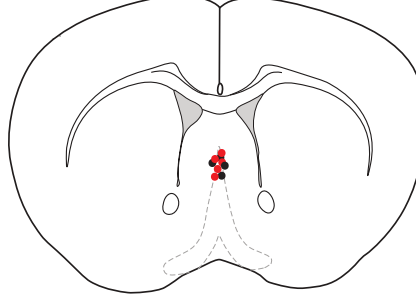

- No stim (n=7)
- Goal (n=9)
