# Supplementary material for: Make Friends With The Googlebot
Source: eLife journal article supplement (doi:10.7554/elife.65998), 2005-03-14
Supplement: supp [file elife-65998-supp-v1.zip › elife_poa_e65998_Figure_2_source_data_1.csv]

day	No stim (n=13)	No stim (n=13)	No stim (n=13)	No stim (n=13)	No stim (n=13)	No stim (n=13)	No stim (n=13)	No stim (n=13)	No stim (n=13)	No stim (n=13)	No stim (n=13)	No stim (n=13)	No stim (n=13)	No stim (n=13)	No stim (n=13)	Goal (n=15)	Goal (n=15)	Goal (n=15)	Goal (n=15)	Goal (n=15)	Goal (n=15)	Goal (n=15)	Goal (n=15)	Goal (n=15)	Goal (n=15)	Goal (n=15)	Goal (n=15)	Goal (n=15)	Goal (n=15)	Goal (n=15)	Throughout (n=9)	Throughout (n=9)	Throughout (n=9)	Throughout (n=9)	Throughout (n=9)	Throughout (n=9)	Throughout (n=9)	Throughout (n=9)	Throughout (n=9)	Throughout (n=9)	Throughout (n=9)	Throughout (n=9)	Throughout (n=9)	Throughout (n=9)	Throughout (n=9)	Exploration (n=9)	Exploration (n=9)	Exploration (n=9)	Exploration (n=9)
1	90	50	40	40	50	60	90	0	60	50	60	70	50			30	90	20	50	50	80	50	70	20	30	90	0	70	50	40	30	40	50	0	20	70	100	50	70							20	50	50	50
2	100	40	60	90	60	50	50	30	70	60	70	70	90			80	70	60	30	90	50	50	50	50	30	70	20	50	30	70	50	50	50	50	80	50	100	60	70							70	50	40	70
3	100	80	90	90	50	80	100	80	100	90	100	100	100			70	90	70	50	90	90	50	70	50	30	60	70	50	40	50	60	50	70	30	100	50	100	50	50							100	80	90	100
4	100	100	100	100	60	100	100	100	100	100	100	100	100			60	100	100	50	80	90	60	90	70	40	60	90	70	100	50	100	80	100	90	90	60	100	100	80							100	100	100	100
5	100	100	100	90	100	100	90	100	100	100	100	100	100			90	100	100	80	100	100	50	100	100	50	80	100	90	90	90	100	100	100	100	90	100	100	100	100							100	100	100	100
6	100	100	100	100	100	100	100	100	100	100	100	100	100			100	100	100	100	100	100	70	100	100	80	90	100	100	100	100	100	100	100	100	90	100	100	100	100							100	100	100	100
7	100	100	100	100	100	100	100	100	100	100	90	100	100			100	100	100	100	100	100	80	100	100	100	100	100	100	100	100	100	100	100	100	100	100	100	100	100							100	100	100	100
[truncated: 11 more columns]
