# Supplementary material for: Make Friends With The Googlebot
Source: eLife journal article supplement (doi:10.7554/elife.65998), 2005-03-14
Supplement: supp [file elife-65998-supp-v1.zip › elife_poa_e65998_Figure_2_source_data_2.csv]

day	No stim (n=7)	No stim (n=7)	No stim (n=7)	No stim (n=7)	No stim (n=7)	No stim (n=7)	No stim (n=7)	Goal (n=9)	Goal (n=9)	Goal (n=9)	Goal (n=9)	Goal (n=9)	Goal (n=9)	Goal (n=9)	Goal (n=9)	Goal (n=9)
1	90	40	40	40	70	30	70	20	0	50	80	60	40	80	40	40
2	60	60	70	10	90	40	40	100	30	60	50	70	30	90	40	50
3	60	100	50	50	90	90	90	90	80	80	100	90	60	100	50	80
4	90	100	80	80	100	100	80	100	100	100	100	100	70	90	90	80
5	100	100	90	80	100	100	90	100	100	100	100	100	100	100	90	100
6	100	100	90	100	100	100	100	100	100	100	100	100	100	100	100	100
