# Supplementary material for: Make Friends With The Googlebot
Source: eLife journal article supplement (doi:10.7554/elife.65998), 2005-03-14
Supplement: supp [file elife-65998-supp-v1.zip › elife_poa_e65998_Figure_3_figure_supplement_2_source_data_1.csv]

	exp	animal	learning_day	compared.bands	relative.diff
1	main-effect	BR	1	theta_above_slow	0.253986623822991
2	main-effect	BR	2	theta_above_slow	-0.0253847841373034
3	main-effect	BR	4	theta_above_slow	0.304520616750963
4	main-effect	BR	5	theta_above_slow	0.512066321485614
5	main-effect	BS	2	theta_above_slow	0.0921299437684686
6	main-effect	BS	4	theta_above_slow	0.0674408193855038
7	main-effect	BS	5	theta_above_slow	0.00323513283473797
8	main-effect	BS	6	theta_above_slow	0.0792283121610664
9	gfp-control	GD	1	theta_above_slow	0.512393885225553
10	gfp-control	GD	2	theta_above_slow	0.192409636505287
11	gfp-control	GD	3	theta_above_slow	0.0146767024568444
12	gfp-control	GD	4	theta_above_slow	0.144874689978165
13	gfp-control	GD	5	theta_above_slow	0.000996471796186782
14	gfp-control	GD	6	theta_above_slow	0.218880010385977
15	main-effect	OS	1	theta_above_slow	0.00077093966161712
16	main-effect	OS	5	theta_above_slow	0.0856523183884477
17	main-effect	OS	6	theta_above_slow	-0.525472961887338
18	gfp-control	OS	1	theta_above_slow	0.38007491206338
19	gfp-control	OS	2	theta_above_slow	0.589594988381759
20	gfp-control	OS	3	theta_above_slow	0.401377120851206
21	gfp-control	OS	4	theta_above_slow	0.577050197502972
22	gfp-control	OS	5	theta_above_slow	0.459256020196777
23	gfp-control	OS	6	theta_above_slow	0.459668347641442
24	main-effect	PT	1	theta_above_slow	0.0046245123022981
25	main-effect	PT	2	theta_above_slow	0.00960177528081552
26	main-effect	PT	5	theta_above_slow	0.187613615757932
27	main-effect	PT	6	theta_above_slow	0.232699300690044
28	main-effect	TL	1	theta_above_slow	0.445664443526493
29	main-effect	TL	2	theta_above_slow	0.546004669332099
30	main-effect	TL	3	theta_above_slow	0.70965443807758
31	main-effect	TL	4	theta_above_slow	0.41663585588943
32	main-effect	TL	5	theta_above_slow	0.613479330725538
33	main-effect	TL	6	theta_above_slow	0.656845654279438
34	main-effect	BR	1	theta_above_supra	0.0212722931852323
35	main-effect	BR	2	theta_above_supra	0.073803116817027
36	main-effect	BR	4	theta_above_supra	0.0260567571838841
37	main-effect	BR	5	theta_above_supra	0.0758520855689842
38	main-effect	BS	2	theta_above_supra	-0.0129590450651937
39	main-effect	BS	4	theta_above_supra	-0.0246602151333688
40	main-effect	BS	5	theta_above_supra	0.123367102007237
41	main-effect	BS	6	theta_above_supra	0.0742948535361361
42	gfp-control	GD	1	theta_above_supra	0.084393343743228
43	gfp-control	GD	2	theta_above_supra	0.160078517646435
44	gfp-control	GD	3	theta_above_supra	0.170315299359702
45	gfp-control	GD	4	theta_above_supra	0.272060752825414
46	gfp-control	GD	5	theta_above_supra	-0.0118013829983195
47	gfp-control	GD	6	theta_above_supra	0.0228379960570955
48	main-effect	OS	1	theta_above_supra	0.022115664821186
49	main-effect	OS	5	theta_above_supra	0.0616228847690845
50	main-effect	OS	6	theta_above_supra	0.129287668408486
51	gfp-control	OS	1	theta_above_supra	0.333327468339874
52	gfp-control	OS	2	theta_above_supra	0.377580225345067
53	gfp-control	OS	3	theta_above_supra	0.380262362859476
54	gfp-control	OS	4	theta_above_supra	0.405638101316026
55	gfp-control	OS	5	theta_above_supra	0.38497359737039
56	gfp-control	OS	6	theta_above_supra	0.367882613209495
57	main-effect	PT	1	theta_above_supra	-0.00765603043193508
58	main-effect	PT	2	theta_above_supra	0.053753495837995
59	main-effect	PT	5	theta_above_supra	0.433797008351732
60	main-effect	PT	6	theta_above_supra	0.019010428083833
61	main-effect	TL	1	theta_above_supra	0.192613861121512
62	main-effect	TL	2	theta_above_supra	0.224811562144966
63	main-effect	TL	3	theta_above_supra	0.199891295692911
64	main-effect	TL	4	theta_above_supra	0.240187219699303
65	main-effect	TL	5	theta_above_supra	0.17477204380679
66	main-effect	TL	6	theta_above_supra	0.261916843877465
67	main-effect	BR	1	slow_gamma_above_supra_theta	0.147337828273669
68	main-effect	BR	2	slow_gamma_above_supra_theta	0.152735787974123
69	main-effect	BR	4	slow_gamma_above_supra_theta	0.0214753858835497
70	main-effect	BR	5	slow_gamma_above_supra_theta	0.0755203189408125
71	main-effect	BS	2	slow_gamma_above_supra_theta	0.213619847720443
72	main-effect	BS	4	slow_gamma_above_supra_theta	0.171424671130167
73	main-effect	BS	5	slow_gamma_above_supra_theta	0.272153213269908
74	main-effect	BS	6	slow_gamma_above_supra_theta	0.166193699049847
75	gfp-control	GD	1	slow_gamma_above_supra_theta	0.0819105132410769
76	gfp-control	GD	2	slow_gamma_above_supra_theta	-0.011420498203794
77	gfp-control	GD	3	slow_gamma_above_supra_theta	0.508533598966221
78	gfp-control	GD	4	slow_gamma_above_supra_theta	0.377168943056967
79	gfp-control	GD	5	slow_gamma_above_supra_theta	-0.210324623463423
80	gfp-control	GD	6	slow_gamma_above_supra_theta	-0.120089641149571
81	main-effect	OS	1	slow_gamma_above_supra_theta	0.108916387062978
82	main-effect	OS	5	slow_gamma_above_supra_theta	0.178539181065423
83	main-effect	OS	6	slow_gamma_above_supra_theta	0.127584372084659
84	gfp-control	OS	1	slow_gamma_above_supra_theta	0.0859553749110766
85	gfp-control	OS	2	slow_gamma_above_supra_theta	0.162714500942098
86	gfp-control	OS	3	slow_gamma_above_supra_theta	0.218883734559308
87	gfp-control	OS	4	slow_gamma_above_supra_theta	0.184147805932334
88	gfp-control	OS	5	slow_gamma_above_supra_theta	0.417120255143447
89	gfp-control	OS	6	slow_gamma_above_supra_theta	0.293374968909266
90	main-effect	PT	1	slow_gamma_above_supra_theta	0.200216307976001
91	main-effect	PT	2	slow_gamma_above_supra_theta	0.145077403123681
92	main-effect	PT	5	slow_gamma_above_supra_theta	0.288815820824535
93	main-effect	PT	6	slow_gamma_above_supra_theta	0.226555486272536
94	main-effect	TL	1	slow_gamma_above_supra_theta	0.440461060100837
95	main-effect	TL	2	slow_gamma_above_supra_theta	0.225032693447396
96	main-effect	TL	3	slow_gamma_above_supra_theta	0.391570279255157
97	main-effect	TL	4	slow_gamma_above_supra_theta	0.235978017276665
98	main-effect	TL	5	slow_gamma_above_supra_theta	0.0999047932852726
99	main-effect	TL	6	slow_gamma_above_supra_theta	0.256714007920126
100	main-effect	BR	1	slow_gamma_above_supra	0.0649950776522275
101	main-effect	BR	2	slow_gamma_above_supra	0.106480604111633
102	main-effect	BR	4	slow_gamma_above_supra	-0.0498653940626959
103	main-effect	BR	5	slow_gamma_above_supra	-0.0959856961347452
104	main-effect	BS	2	slow_gamma_above_supra	0.00807662669283182
105	main-effect	BS	4	slow_gamma_above_supra	0.130615922234114
106	main-effect	BS	5	slow_gamma_above_supra	0.235321721376058
107	main-effect	BS	6	slow_gamma_above_supra	-0.00839666083917479
108	gfp-control	GD	1	slow_gamma_above_supra	-0.216261905679119
109	gfp-control	GD	2	slow_gamma_above_supra	-0.0622081508121148
110	gfp-control	GD	3	slow_gamma_above_supra	0.135145590103278
111	gfp-control	GD	4	slow_gamma_above_supra	0.0891706699828791
112	gfp-control	GD	5	slow_gamma_above_supra	0.131268545932915
113	gfp-control	GD	6	slow_gamma_above_supra	-0.116299999368456
114	main-effect	OS	1	slow_gamma_above_supra	-0.188783092406894
115	main-effect	OS	5	slow_gamma_above_supra	0.0651902848216803
116	main-effect	OS	6	slow_gamma_above_supra	0.00159905554154882
117	gfp-control	OS	1	slow_gamma_above_supra	0.148307584754216
118	gfp-control	OS	2	slow_gamma_above_supra	0.0940610049596131
119	gfp-control	OS	3	slow_gamma_above_supra	-0.123670352008805
120	gfp-control	OS	4	slow_gamma_above_supra	0.065210734924035
121	gfp-control	OS	5	slow_gamma_above_supra	0.0761618426534767
122	gfp-control	OS	6	slow_gamma_above_supra	0.104722524305798
123	main-effect	PT	1	slow_gamma_above_supra	-0.12279678912226
124	main-effect	PT	2	slow_gamma_above_supra	0.14752183586601
125	main-effect	PT	5	slow_gamma_above_supra	0.0405676421478809
126	main-effect	PT	6	slow_gamma_above_supra	0.00624913500305446
127	main-effect	TL	1	slow_gamma_above_supra	0.399781359544336
128	main-effect	TL	2	slow_gamma_above_supra	0.022202451944521
129	main-effect	TL	3	slow_gamma_above_supra	0.172836362926299
130	main-effect	TL	4	slow_gamma_above_supra	0.231761660326024
131	main-effect	TL	5	slow_gamma_above_supra	0.107162927286289
132	main-effect	TL	6	slow_gamma_above_supra	0.107672155704066
