# Supplementary material for: Make Friends With The Googlebot
Source: eLife journal article supplement (doi:10.7554/elife.65998), 2005-03-14
Supplement: supp [file elife-65998-supp-v1.zip › elife_poa_e65998_Figure_3_source_data_1.csv]

	exp	animal	trial_id	laserOn	pow_theta
1	main-effect	PT	2019-11-06_PT_signal/PT_trial_4_g0_2	1	0.334000942730249
2	main-effect	PT	2019-11-06_PT_signal/PT_trial_5_g0_2	0	0.371450343349737
3	main-effect	PT	2019-11-06_PT_signal/PT_trial_8_g0_2	1	0.417417771267776
4	main-effect	OS	2019-11-06_OS_signal/OS_trial_3_g0_2	0	0.470762053818829
5	main-effect	OS	2019-11-06_OS_signal/OS_trial_6_g0_2	1	0.527458872249308
6	main-effect	OS	2019-11-06_OS_signal/OS_trial_10_g0_2	1	0.450695022171554
7	main-effect	BS	2019-11-06_BS_signal/BS_trial_2_g0_2	1	0.676936121410858
8	main-effect	PT	2019-11-07_PT_signal/PT_trial_3_g0_2	0	0.534887748404045
9	main-effect	PT	2019-11-07_PT_signal/PT_trial_4_g0_2	1	0.271806756142476
10	main-effect	PT	2019-11-07_PT_signal/PT_trial_5_g0_2	0	0.348259460554528
11	main-effect	PT	2019-11-07_PT_signal/PT_trial_9_g0_2	0	0.246858716528519
12	main-effect	BS	2019-11-07_BS_signal/BS_trial_3_g0_2	0	0.799878791372572
13	main-effect	BS	2019-11-07_BS_signal/BS_trial_4_g0_2	1	0.773104850800659
14	main-effect	BS	2019-11-07_BS_signal/BS_trial_5_g0_2	0	0.669077892605722
15	main-effect	BS	2019-11-07_BS_signal/BS_trial_8_g0_2	1	0.771420295173149
16	main-effect	BS	2019-11-07_BS_signal/BS_trial_9_g0_2	0	0.614570750071183
17	main-effect	BS	2019-11-07_BS_signal/BS_trial_10_g0_2	1	0.665520205801179
18	main-effect	PT	2019-11-08_PT_signal/PT_trial_3_g0_2	0	0.326748355803573
19	main-effect	PT	2019-11-08_PT_signal/PT_trial_6_g0_2	0	0.291735252146255
20	main-effect	PT	2019-11-08_PT_signal/PT_trial_9_g0_2	0	0.271817851301157
21	main-effect	BS	2019-11-08_BS_signal/BS_trial_1_g0_2	0	0.639132112968647
22	main-effect	BS	2019-11-08_BS_signal/BS_trial_2_g0_2	0	0.710829559448441
23	main-effect	BS	2019-11-08_BS_signal/BS_trial_7_g0_2	0	0.590454391432497
24	main-effect	BS	2019-11-08_BS_signal/BS_trial_9_g0_2	0	0.698587993002553
25	main-effect	BS	2019-11-08_BS_signal/BS_trial_10_g0_2	0	0.617992204336064
26	main-effect	OS	2019-11-11_OS_signal/OS_trial_6_g0_2	1	0.425268913922825
27	main-effect	OS	2019-11-11_OS_signal/OS_trial_10_g0_2	1	0.551974698395814
28	main-effect	BS	2019-11-11_BS_signal/BS_trial_2_g0_2	1	0.684040637441339
29	main-effect	BS	2019-11-11_BS_signal/BS_trial_7_g0_2	0	0.673865717324087
30	main-effect	BS	2019-11-11_BS_signal/BS_trial_8_g0_2	1	0.662927967058078
31	main-effect	BS	2019-11-11_BS_signal/BS_trial_9_g0_2	0	0.529549351613809
32	main-effect	BS	2019-11-11_BS_signal/BS_trial_10_g0_2	1	0.633348973879821
33	main-effect	PT	2019-11-12_PT_signal/PT_trial_2_g0_2	1	0.470317322080327
34	main-effect	PT	2019-11-12_PT_signal/PT_trial_5_g0_2	0	0.239253766655348
35	main-effect	PT	2019-11-12_PT_signal/PT_trial_7_g0_2	0	0.224694590231348
36	main-effect	PT	2019-11-12_PT_signal/PT_trial_9_g0_2	0	0.246698630010183
37	main-effect	PT	2019-11-12_PT_signal/PT_trial_10_g0_2	1	0.352672352765003
38	main-effect	OS	2019-11-12_OS_signal/OS_trial_9_g0_2	0	0.395378326795234
39	main-effect	BS	2019-11-12_BS_signal/BS_trial_2_g0_2	1	0.652301180597803
40	main-effect	BS	2019-11-12_BS_signal/BS_trial_3_g0_2	0	0.695543212440692
41	main-effect	BS	2019-11-12_BS_signal/BS_trial_5_g0_2	0	0.673514187198365
42	main-effect	BS	2019-11-12_BS_signal/BS_trial_7_g0_2	0	0.588742192189134
43	main-effect	BS	2019-11-12_BS_signal/BS_trial_8_g0_2	1	0.682283929948226
44	main-effect	BS	2019-11-12_BS_signal/BS_trial_10_g0_2	1	0.659969214806289
45	main-effect	PT	2019-11-13_PT_signal/PT_trial_1_g0_2	0	0.329295909596737
46	main-effect	PT	2019-11-13_PT_signal/PT_trial_2_g0_2	1	0.2871848985368
47	main-effect	PT	2019-11-13_PT_signal/PT_trial_3_g0_2	0	0.236044716396216
48	main-effect	PT	2019-11-13_PT_signal/PT_trial_4_g0_2	1	0.369395300946252
49	main-effect	PT	2019-11-13_PT_signal/PT_trial_5_g0_2	0	0.162039986502776
50	main-effect	PT	2019-11-13_PT_signal/PT_trial_6_g0_2	1	0.310724500731247
51	main-effect	PT	2019-11-13_PT_signal/PT_trial_8_g0_2	1	0.159109769836457
52	main-effect	OS	2019-11-13_OS_signal/OS_trial_2_g0_2	1	0.475439013538433
53	main-effect	OS	2019-11-13_OS_signal/OS_trial_3_g0_2	0	0.478057883786701
54	main-effect	OS	2019-11-13_OS_signal/OS_trial_4_g0_2	1	0.625331199140839
55	main-effect	OS	2019-11-13_OS_signal/OS_trial_5_g0_2	0	0.502860814393956
56	main-effect	OS	2019-11-13_OS_signal/OS_trial_7_g0_2	0	0.41219058387321
57	main-effect	OS	2019-11-13_OS_signal/OS_trial_8_g0_2	1	0.296727162969986
58	main-effect	OS	2019-11-13_OS_signal/OS_trial_9_g0_2	0	0.480620312419838
59	main-effect	BS	2019-11-13_BS_signal/BS_trial_1_g0_2	0	0.606578500758503
60	main-effect	BS	2019-11-13_BS_signal/BS_trial_2_g0_2	1	0.644874596718153
61	main-effect	BS	2019-11-13_BS_signal/BS_trial_3_g0_2	0	0.571723449689704
62	main-effect	BS	2019-11-13_BS_signal/BS_trial_5_g0_2	0	0.655378793829848
63	main-effect	BS	2019-11-13_BS_signal/BS_trial_6_g0_2	1	0.696742202546884
64	main-effect	BS	2019-11-13_BS_signal/BS_trial_7_g0_2	0	0.62801238617818
65	main-effect	BS	2019-11-13_BS_signal/BS_trial_8_g0_2	1	0.600637933103483
66	main-effect	BS	2019-11-13_BS_signal/BS_trial_9_g0_2	0	0.620756669768631
67	main-effect	BS	2019-11-13_BS_signal/BS_trial_10_g0_2	1	0.689340718632332
68	main-effect	BR	2020-08-24_BR_signal/BR_trial_2_g0_2	1	0.471291712761415
69	main-effect	BR	2020-08-24_BR_signal/BR_trial_3_g0_2	0	0.340364722727473
70	main-effect	BR	2020-08-24_BR_signal/BR_trial_4_g0_2	1	0.577891625019127
71	main-effect	BR	2020-08-24_BR_signal/BR_trial_5_g0_2	0	0.41135865943226
72	main-effect	BR	2020-08-24_BR_signal/BR_trial_6_g0_2	1	0.447103528246928
73	main-effect	BR	2020-08-24_BR_signal/BR_trial_7_g0_2	0	0.422719364935352
74	main-effect	BR	2020-08-24_BR_signal/BR_trial_8_g0_2	1	0.427051220315691
75	main-effect	BR	2020-08-24_BR_signal/BR_trial_9_g0_2	0	0.479020272234854
76	main-effect	BR	2020-08-24_BR_signal/BR_trial_10_g0_2	1	0.42713623122244
77	main-effect	TL	2020-08-24_TL_signal/TL_trial_2_g0_2	1	0.410248965305423
78	main-effect	TL	2020-08-24_TL_signal/TL_trial_4_g0_2	1	0.370418013868993
79	main-effect	TL	2020-08-24_TL_signal/TL_trial_6_g0_2	1	0.41011268779291
80	main-effect	TL	2020-08-24_TL_signal/TL_trial_7_g0_2	0	0.372346814326939
81	main-effect	TL	2020-08-24_TL_signal/TL_trial_8_g0_2	1	0.496197168663405
82	main-effect	TL	2020-08-24_TL_signal/TL_trial_9_g0_2	0	0.345903438571028
83	main-effect	BR	2020-08-25_BR_signal/BR_trial_4_g0_2	1	0.427143547284915
84	main-effect	BR	2020-08-25_BR_signal/BR_trial_7_g0_2	0	0.477706479363913
85	main-effect	BR	2020-08-25_BR_signal/BR_trial_8_g0_2	1	0.430682051904203
86	main-effect	BR	2020-08-25_BR_signal/BR_trial_9_g0_2	0	0.362585304147925
87	main-effect	BR	2020-08-25_BR_signal/BR_trial_10_g0_2	1	0.426720548963458
88	main-effect	TL	2020-08-25_TL_signal/TL_trial_6_g0_2	0	0.398828093940396
89	main-effect	TL	2020-08-26_TL_signal/TL_trial_1_g0_2	0	0.330389635810196
90	main-effect	TL	2020-08-26_TL_signal/TL_trial_2_g0_2	1	0.445624971909578
91	main-effect	TL	2020-08-26_TL_signal/TL_trial_6_g0_2	1	0.380642795792904
92	main-effect	TL	2020-08-26_TL_signal/TL_trial_8_g0_2	1	0.442642054783535
93	main-effect	TL	2020-08-26_TL_signal/TL_trial_9_g0_2	0	0.307865070262381
94	main-effect	BR	2020-08-27_BR_signal/BR_trial_1_g0_2	0	0.450523768292959
95	main-effect	BR	2020-08-27_BR_signal/BR_trial_2_g0_2	1	0.438124896376173
96	main-effect	BR	2020-08-27_BR_signal/BR_trial_3_g0_2	0	0.432883465364978
97	main-effect	BR	2020-08-27_BR_signal/BR_trial_4_g0_2	1	0.411445180210622
98	main-effect	BR	2020-08-27_BR_signal/BR_trial_5_g0_2	0	0.405156685874848
99	main-effect	BR	2020-08-27_BR_signal/BR_trial_6_g0_2	1	0.516073625192652
100	main-effect	BR	2020-08-27_BR_signal/BR_trial_7_g0_2	0	0.499363193166287
101	main-effect	BR	2020-08-27_BR_signal/BR_trial_8_g0_2	1	0.424176498984695
102	main-effect	BR	2020-08-27_BR_signal/BR_trial_10_g0_2	1	0.499513749392538
103	main-effect	TL	2020-08-27_TL_signal/TL_trial_2_g0_2	1	0.548247468985035
104	main-effect	TL	2020-08-27_TL_signal/TL_trial_3_g0_2	0	0.394868170646688
105	main-effect	TL	2020-08-27_TL_signal/TL_trial_4_g0_2	1	0.548363362064572
106	main-effect	TL	2020-08-27_TL_signal/TL_trial_5_g0_2	0	0.41277999693004
107	main-effect	TL	2020-08-27_TL_signal/TL_trial_6_g0_2	1	0.449529613444709
108	main-effect	TL	2020-08-27_TL_signal/TL_trial_7_g0_2	0	0.37114278391721
109	main-effect	TL	2020-08-27_TL_signal/TL_trial_8_g0_2	1	0.46650170309271
110	main-effect	TL	2020-08-27_TL_signal/TL_trial_9_g0_2	0	0.388427903525124
111	main-effect	BR	2020-08-28_BR_signal/BR_trial_1_g0_2	0	0.326299145705168
112	main-effect	BR	2020-08-28_BR_signal/BR_trial_2_g0_2	1	0.46787569181581
113	main-effect	BR	2020-08-28_BR_signal/BR_trial_3_g0_2	0	0.401999022599304
114	main-effect	BR	2020-08-28_BR_signal/BR_trial_4_g0_2	1	0.424926826673357
115	main-effect	BR	2020-08-28_BR_signal/BR_trial_5_g0_2	0	0.407168113566369
116	main-effect	BR	2020-08-28_BR_signal/BR_trial_6_g0_2	1	0.371030260512122
117	main-effect	TL	2020-08-28_TL_signal/TL_trial_1_g0_2	0	0.385345708786729
118	main-effect	TL	2020-08-28_TL_signal/TL_trial_2_g0_2	1	0.516091845531942
119	main-effect	TL	2020-08-28_TL_signal/TL_trial_3_g0_2	0	0.303248287114374
120	main-effect	TL	2020-08-28_TL_signal/TL_trial_4_g0_2	1	0.48708022583218
121	main-effect	TL	2020-08-28_TL_signal/TL_trial_5_g0_2	0	0.403159756201698
122	main-effect	TL	2020-08-28_TL_signal/TL_trial_6_g0_2	1	0.597207261143626
123	main-effect	TL	2020-08-28_TL_signal/TL_trial_7_g0_2	0	0.376590250895384
124	main-effect	TL	2020-08-28_TL_signal/TL_trial_8_g0_2	1	0.469683743635608
125	main-effect	TL	2020-08-29_TL_signal/TL_trial_1_g0_2	0	0.479603283399944
126	main-effect	TL	2020-08-29_TL_signal/TL_trial_2_g0_2	1	0.52946909246943
127	main-effect	TL	2020-08-29_TL_signal/TL_trial_3_g0_2	0	0.451961717872377
128	main-effect	TL	2020-08-29_TL_signal/TL_trial_4_g0_2	1	0.538877631536725
129	main-effect	TL	2020-08-29_TL_signal/TL_trial_5_g0_2	0	0.399704645923917
130	main-effect	TL	2020-08-29_TL_signal/TL_trial_6_g0_2	1	0.533690467707171
131	main-effect	TL	2020-08-29_TL_signal/TL_trial_7_g0_2	0	0.336518190250162
132	main-effect	TL	2020-08-29_TL_signal/TL_trial_8_g0_2	1	0.578483573043886
133	main-effect	TL	2020-08-29_TL_signal/TL_trial_9_g0_2	0	0.374715921221323
134	main-effect	TL	2020-08-29_TL_signal/TL_trial_10_g0_2	1	0.468144570001691
135	gfp-control	OS	2020-08-24_OS_signal/OS_trial_3_g0_2	0	0.489233364988366
136	gfp-control	OS	2020-08-24_OS_signal/OS_trial_7_g0_2	0	0.428396353935504
137	gfp-control	OS	2020-08-24_OS_signal/OS_trial_8_g0_2	1	0.550015675472659
138	gfp-control	OS	2020-08-24_OS_signal/OS_trial_9_g0_2	0	0.391987188190601
139	gfp-control	OS	2020-08-24_OS_signal/OS_trial_10_g0_2	1	0.346635491408239
140	gfp-control	GD	2020-08-24_GD_signal/GD_trial_1_g0_2	0	0.616482347028167
141	gfp-control	GD	2020-08-24_GD_signal/GD_trial_2_g0_2	1	0.64259570668779
142	gfp-control	OS	2020-08-25_OS_signal/OS_trial_2_g0_2	1	0.548914577076267
143	gfp-control	OS	2020-08-25_OS_signal/OS_trial_3_g0_2	0	0.433293765770348
144	gfp-control	OS	2020-08-25_OS_signal/OS_trial_4_g0_2	1	0.479402528940649
145	gfp-control	OS	2020-08-25_OS_signal/OS_trial_5_g0_2	0	0.422957130703588
146	gfp-control	OS	2020-08-25_OS_signal/OS_trial_7_g0_2	0	0.412182465287212
147	gfp-control	OS	2020-08-25_OS_signal/OS_trial_8_g0_2	1	0.449024189733746
148	gfp-control	OS	2020-08-25_OS_signal/OS_trial_9_g0_2	0	0.32828321417559
149	gfp-control	GD	2020-08-25_GD_signal/GD_trial_1_g0_2	0	0.678655314873573
150	gfp-control	GD	2020-08-25_GD_signal/GD_trial_2_g0_2	1	0.684698301309038
151	gfp-control	GD	2020-08-25_GD_signal/GD_trial_3_g0_2	0	0.640174028265906
152	gfp-control	GD	2020-08-25_GD_signal/GD_trial_4_g0_2	1	0.710929872186697
153	gfp-control	GD	2020-08-25_GD_signal/GD_trial_6_g0_2	1	0.646625734579604
154	gfp-control	GD	2020-08-25_GD_signal/GD_trial_8_g0_2	1	0.626417873963767
155	gfp-control	GD	2020-08-25_GD_signal/GD_trial_9_g0_2	0	0.640800944603549
156	gfp-control	OS	2020-08-26_OS_signal/OS_trial_1_g0_2	0	0.538168188092831
157	gfp-control	OS	2020-08-26_OS_signal/OS_trial_7_g0_2	0	0.353390631037624
158	gfp-control	OS	2020-08-26_OS_signal/OS_trial_8_g0_2	1	0.541212505209971
159	gfp-control	OS	2020-08-26_OS_signal/OS_trial_9_g0_2	0	0.242844768884669
160	gfp-control	OS	2020-08-26_OS_signal/OS_trial_10_g0_2	1	0.408819568166878
161	gfp-control	GD	2020-08-26_GD_signal/GD_trial_2_g0_2	1	0.730646185663873
162	gfp-control	GD	2020-08-26_GD_signal/GD_trial_3_g0_2	0	0.63225956073381
163	gfp-control	GD	2020-08-26_GD_signal/GD_trial_10_g0_2	1	0.683764041825234
164	gfp-control	OS	2020-08-27_OS_signal/OS_trial_1_g0_2	0	0.322904997711823
165	gfp-control	OS	2020-08-27_OS_signal/OS_trial_2_g0_2	1	0.471024910826174
166	gfp-control	OS	2020-08-27_OS_signal/OS_trial_3_g0_2	0	0.292574813228262
167	gfp-control	OS	2020-08-27_OS_signal/OS_trial_4_g0_2	1	0.441352791710445
168	gfp-control	OS	2020-08-27_OS_signal/OS_trial_5_g0_2	0	0.430480498875751
169	gfp-control	OS	2020-08-27_OS_signal/OS_trial_7_g0_2	0	0.453837850520529
170	gfp-control	OS	2020-08-27_OS_signal/OS_trial_8_g0_2	1	0.515558683728852
171	gfp-control	OS	2020-08-27_OS_signal/OS_trial_9_g0_2	0	0.46061560409934
172	gfp-control	OS	2020-08-27_OS_signal/OS_trial_10_g0_2	1	0.481197598784033
173	gfp-control	GD	2020-08-27_GD_signal/GD_trial_1_g0_2	0	0.775403302116575
174	gfp-control	GD	2020-08-27_GD_signal/GD_trial_2_g0_2	1	0.824042103266352
175	gfp-control	GD	2020-08-27_GD_signal/GD_trial_6_g0_2	1	0.787042487579163
176	gfp-control	GD	2020-08-27_GD_signal/GD_trial_8_g0_2	1	0.653539433252491
177	gfp-control	OS	2020-08-28_OS_signal/OS_trial_1_g0_2	0	0.445569361613464
178	gfp-control	OS	2020-08-28_OS_signal/OS_trial_2_g0_2	1	0.498865011266333
179	gfp-control	OS	2020-08-28_OS_signal/OS_trial_3_g0_2	0	0.440618244184788
180	gfp-control	OS	2020-08-28_OS_signal/OS_trial_4_g0_2	1	0.488672649133948
181	gfp-control	OS	2020-08-28_OS_signal/OS_trial_5_g0_2	0	0.518669269760689
182	gfp-control	OS	2020-08-28_OS_signal/OS_trial_6_g0_2	1	0.492699073625325
183	gfp-control	OS	2020-08-28_OS_signal/OS_trial_7_g0_2	0	0.424444279181867
184	gfp-control	OS	2020-08-28_OS_signal/OS_trial_8_g0_2	1	0.431858147687284
185	gfp-control	GD	2020-08-28_GD_signal/GD_trial_2_g0_2	1	0.635992811121366
186	gfp-control	GD	2020-08-28_GD_signal/GD_trial_9_g0_2	0	0.657887371095562
187	gfp-control	GD	2020-08-28_GD_signal/GD_trial_10_g0_2	1	0.622344628578373
188	gfp-control	OS	2020-08-29_OS_signal/OS_trial_3_g0_2	0	0.460722299025145
189	gfp-control	OS	2020-08-29_OS_signal/OS_trial_4_g0_2	1	0.499539754223113
190	gfp-control	OS	2020-08-29_OS_signal/OS_trial_5_g0_2	0	0.448732806334979
191	gfp-control	OS	2020-08-29_OS_signal/OS_trial_8_g0_2	1	0.486449192122158
192	gfp-control	OS	2020-08-29_OS_signal/OS_trial_9_g0_2	0	0.529102668542929
193	gfp-control	OS	2020-08-29_OS_signal/OS_trial_10_g0_2	1	0.501815964758576
194	gfp-control	GD	2020-08-29_GD_signal/GD_trial_1_g0_2	0	0.805798007361418
195	gfp-control	GD	2020-08-29_GD_signal/GD_trial_2_g0_2	1	0.827641623720689
196	gfp-control	GD	2020-08-29_GD_signal/GD_trial_6_g0_2	1	0.768810379352619
197	gfp-control	GD	2020-08-29_GD_signal/GD_trial_8_g0_2	1	0.668088569179246
198	gfp-control	GD	2020-08-29_GD_signal/GD_trial_9_g0_2	0	0.705890886695067
199	gfp-control	GD	2020-08-29_GD_signal/GD_trial_10_g0_2	1	0.644387601825402
