# Supplementary material for: Make Friends With The Googlebot
Source: eLife journal article supplement (doi:10.7554/elife.65998), 2005-03-14
Supplement: supp [file elife-65998-supp-v1.zip › elife_poa_e65998_Figure_3_source_data_2.csv]

	exp	animal	trial_id	laserOn	peak_theta
1	main-effect	PT	2019-11-06_PT_signal/PT_trial_4_g0_2	1	7.76051444833034
2	main-effect	PT	2019-11-06_PT_signal/PT_trial_5_g0_2	0	8.11676113850307
3	main-effect	PT	2019-11-06_PT_signal/PT_trial_8_g0_2	1	8.02950893432047
4	main-effect	OS	2019-11-06_OS_signal/OS_trial_3_g0_2	0	7.68568195225899
5	main-effect	OS	2019-11-06_OS_signal/OS_trial_6_g0_2	1	7.97244803323209
6	main-effect	OS	2019-11-06_OS_signal/OS_trial_10_g0_2	1	7.73283960788262
7	main-effect	BS	2019-11-06_BS_signal/BS_trial_2_g0_2	1	7.81353888684238
8	main-effect	PT	2019-11-07_PT_signal/PT_trial_3_g0_2	0	8.10659913953628
9	main-effect	PT	2019-11-07_PT_signal/PT_trial_4_g0_2	1	7.99625586211276
10	main-effect	PT	2019-11-07_PT_signal/PT_trial_5_g0_2	0	8.05199334341252
11	main-effect	PT	2019-11-07_PT_signal/PT_trial_9_g0_2	0	7.90357427914757
12	main-effect	BS	2019-11-07_BS_signal/BS_trial_3_g0_2	0	7.94682999208535
13	main-effect	BS	2019-11-07_BS_signal/BS_trial_4_g0_2	1	7.86722164759016
14	main-effect	BS	2019-11-07_BS_signal/BS_trial_5_g0_2	0	7.91308229631961
15	main-effect	BS	2019-11-07_BS_signal/BS_trial_8_g0_2	1	7.9213782889925
16	main-effect	BS	2019-11-07_BS_signal/BS_trial_9_g0_2	0	7.83141981618098
17	main-effect	BS	2019-11-07_BS_signal/BS_trial_10_g0_2	1	7.5208131608547
18	main-effect	PT	2019-11-08_PT_signal/PT_trial_3_g0_2	0	7.58641721572338
19	main-effect	PT	2019-11-08_PT_signal/PT_trial_6_g0_2	0	7.92753786945073
20	main-effect	PT	2019-11-08_PT_signal/PT_trial_9_g0_2	0	8.3230963223176
21	main-effect	BS	2019-11-08_BS_signal/BS_trial_1_g0_2	0	7.6713383731549
22	main-effect	BS	2019-11-08_BS_signal/BS_trial_2_g0_2	0	8.06485565804955
23	main-effect	BS	2019-11-08_BS_signal/BS_trial_7_g0_2	0	7.61329035694661
24	main-effect	BS	2019-11-08_BS_signal/BS_trial_9_g0_2	0	7.70984461911107
25	main-effect	BS	2019-11-08_BS_signal/BS_trial_10_g0_2	0	7.74142752436604
26	main-effect	OS	2019-11-11_OS_signal/OS_trial_6_g0_2	1	7.71267893661256
27	main-effect	OS	2019-11-11_OS_signal/OS_trial_10_g0_2	1	8.42393686751989
28	main-effect	BS	2019-11-11_BS_signal/BS_trial_2_g0_2	1	7.74101860440793
29	main-effect	BS	2019-11-11_BS_signal/BS_trial_7_g0_2	0	7.67841419615498
30	main-effect	BS	2019-11-11_BS_signal/BS_trial_8_g0_2	1	7.64486806781362
31	main-effect	BS	2019-11-11_BS_signal/BS_trial_9_g0_2	0	7.70630212242493
32	main-effect	BS	2019-11-11_BS_signal/BS_trial_10_g0_2	1	7.53442596674427
33	main-effect	PT	2019-11-12_PT_signal/PT_trial_2_g0_2	1	7.87895505288466
34	main-effect	PT	2019-11-12_PT_signal/PT_trial_5_g0_2	0	7.75605843205011
35	main-effect	PT	2019-11-12_PT_signal/PT_trial_7_g0_2	0	7.67140939263929
36	main-effect	PT	2019-11-12_PT_signal/PT_trial_9_g0_2	0	8.27175088409883
37	main-effect	PT	2019-11-12_PT_signal/PT_trial_10_g0_2	1	7.65404263096089
38	main-effect	OS	2019-11-12_OS_signal/OS_trial_9_g0_2	0	8.31010768122717
39	main-effect	BS	2019-11-12_BS_signal/BS_trial_2_g0_2	1	7.63197199748123
40	main-effect	BS	2019-11-12_BS_signal/BS_trial_3_g0_2	0	7.87085690311517
41	main-effect	BS	2019-11-12_BS_signal/BS_trial_5_g0_2	0	7.485767904134
42	main-effect	BS	2019-11-12_BS_signal/BS_trial_7_g0_2	0	7.79317918745776
43	main-effect	BS	2019-11-12_BS_signal/BS_trial_8_g0_2	1	7.49466147043556
44	main-effect	BS	2019-11-12_BS_signal/BS_trial_10_g0_2	1	7.44267420626951
45	main-effect	PT	2019-11-13_PT_signal/PT_trial_1_g0_2	0	7.50954973618072
46	main-effect	PT	2019-11-13_PT_signal/PT_trial_2_g0_2	1	7.58498514906249
47	main-effect	PT	2019-11-13_PT_signal/PT_trial_3_g0_2	0	7.97151162776113
48	main-effect	PT	2019-11-13_PT_signal/PT_trial_4_g0_2	1	7.98396967856498
49	main-effect	PT	2019-11-13_PT_signal/PT_trial_5_g0_2	0	9.00957401721863
50	main-effect	PT	2019-11-13_PT_signal/PT_trial_6_g0_2	1	7.68484856967208
51	main-effect	PT	2019-11-13_PT_signal/PT_trial_8_g0_2	1	8.40308777891316
52	main-effect	OS	2019-11-13_OS_signal/OS_trial_2_g0_2	1	7.72081399098973
53	main-effect	OS	2019-11-13_OS_signal/OS_trial_3_g0_2	0	7.49228339064897
54	main-effect	OS	2019-11-13_OS_signal/OS_trial_4_g0_2	1	8.25597949582494
55	main-effect	OS	2019-11-13_OS_signal/OS_trial_5_g0_2	0	7.5691291427496
56	main-effect	OS	2019-11-13_OS_signal/OS_trial_7_g0_2	0	7.83943509410843
57	main-effect	OS	2019-11-13_OS_signal/OS_trial_8_g0_2	1	8.61091455547533
58	main-effect	OS	2019-11-13_OS_signal/OS_trial_9_g0_2	0	7.72027294038313
59	main-effect	BS	2019-11-13_BS_signal/BS_trial_1_g0_2	0	7.04699725863715
60	main-effect	BS	2019-11-13_BS_signal/BS_trial_2_g0_2	1	7.17962428257291
61	main-effect	BS	2019-11-13_BS_signal/BS_trial_3_g0_2	0	7.77794777546925
62	main-effect	BS	2019-11-13_BS_signal/BS_trial_5_g0_2	0	7.44982724264003
63	main-effect	BS	2019-11-13_BS_signal/BS_trial_6_g0_2	1	7.40416384534518
64	main-effect	BS	2019-11-13_BS_signal/BS_trial_7_g0_2	0	7.80847185457269
65	main-effect	BS	2019-11-13_BS_signal/BS_trial_8_g0_2	1	7.66878945437252
66	main-effect	BS	2019-11-13_BS_signal/BS_trial_9_g0_2	0	7.76538208991023
67	main-effect	BS	2019-11-13_BS_signal/BS_trial_10_g0_2	1	7.42521320515543
68	main-effect	BR	2020-08-24_BR_signal/BR_trial_2_g0_2	1	7.90785679410787
69	main-effect	BR	2020-08-24_BR_signal/BR_trial_3_g0_2	0	7.49805682998377
70	main-effect	BR	2020-08-24_BR_signal/BR_trial_4_g0_2	1	8.08970764853874
71	main-effect	BR	2020-08-24_BR_signal/BR_trial_5_g0_2	0	8.1612706484976
72	main-effect	BR	2020-08-24_BR_signal/BR_trial_6_g0_2	1	7.74400302226523
73	main-effect	BR	2020-08-24_BR_signal/BR_trial_7_g0_2	0	7.50486826257869
74	main-effect	BR	2020-08-24_BR_signal/BR_trial_8_g0_2	1	8.28800838342502
75	main-effect	BR	2020-08-24_BR_signal/BR_trial_9_g0_2	0	7.82203474940742
76	main-effect	BR	2020-08-24_BR_signal/BR_trial_10_g0_2	1	8.15524899221333
77	main-effect	TL	2020-08-24_TL_signal/TL_trial_2_g0_2	1	8.41813483506847
78	main-effect	TL	2020-08-24_TL_signal/TL_trial_4_g0_2	1	8.25585043359771
79	main-effect	TL	2020-08-24_TL_signal/TL_trial_6_g0_2	1	8.36311795284459
80	main-effect	TL	2020-08-24_TL_signal/TL_trial_7_g0_2	0	8.06354266872967
81	main-effect	TL	2020-08-24_TL_signal/TL_trial_8_g0_2	1	8.74287646591637
82	main-effect	TL	2020-08-24_TL_signal/TL_trial_9_g0_2	0	7.76825257106709
83	main-effect	BR	2020-08-25_BR_signal/BR_trial_4_g0_2	1	8.09626053877314
84	main-effect	BR	2020-08-25_BR_signal/BR_trial_7_g0_2	0	7.8782645455714
85	main-effect	BR	2020-08-25_BR_signal/BR_trial_8_g0_2	1	7.68802318068513
86	main-effect	BR	2020-08-25_BR_signal/BR_trial_9_g0_2	0	8.05232765701849
87	main-effect	BR	2020-08-25_BR_signal/BR_trial_10_g0_2	1	7.72344584579167
88	main-effect	TL	2020-08-25_TL_signal/TL_trial_6_g0_2	0	7.48873525372206
89	main-effect	TL	2020-08-26_TL_signal/TL_trial_1_g0_2	0	7.32106838906908
90	main-effect	TL	2020-08-26_TL_signal/TL_trial_2_g0_2	1	8.08265436332232
91	main-effect	TL	2020-08-26_TL_signal/TL_trial_6_g0_2	1	8.00075154446465
92	main-effect	TL	2020-08-26_TL_signal/TL_trial_8_g0_2	1	8.32989973968054
93	main-effect	TL	2020-08-26_TL_signal/TL_trial_9_g0_2	0	7.65036833514018
94	main-effect	BR	2020-08-27_BR_signal/BR_trial_1_g0_2	0	7.95527429790437
95	main-effect	BR	2020-08-27_BR_signal/BR_trial_2_g0_2	1	8.20980260501216
96	main-effect	BR	2020-08-27_BR_signal/BR_trial_3_g0_2	0	8.23270488041659
97	main-effect	BR	2020-08-27_BR_signal/BR_trial_4_g0_2	1	7.8994460762347
98	main-effect	BR	2020-08-27_BR_signal/BR_trial_5_g0_2	0	7.73899863327167
99	main-effect	BR	2020-08-27_BR_signal/BR_trial_6_g0_2	1	8.11118460595319
100	main-effect	BR	2020-08-27_BR_signal/BR_trial_7_g0_2	0	7.95039189885863
101	main-effect	BR	2020-08-27_BR_signal/BR_trial_8_g0_2	1	8.1795578800714
102	main-effect	BR	2020-08-27_BR_signal/BR_trial_10_g0_2	1	7.90552299973257
103	main-effect	TL	2020-08-27_TL_signal/TL_trial_2_g0_2	1	8.1131362311619
104	main-effect	TL	2020-08-27_TL_signal/TL_trial_3_g0_2	0	7.58953388304964
105	main-effect	TL	2020-08-27_TL_signal/TL_trial_4_g0_2	1	7.78563099630772
106	main-effect	TL	2020-08-27_TL_signal/TL_trial_5_g0_2	0	6.98450674460845
107	main-effect	TL	2020-08-27_TL_signal/TL_trial_6_g0_2	1	7.64297098558391
108	main-effect	TL	2020-08-27_TL_signal/TL_trial_7_g0_2	0	7.50189955143987
109	main-effect	TL	2020-08-27_TL_signal/TL_trial_8_g0_2	1	7.88911087993888
110	main-effect	TL	2020-08-27_TL_signal/TL_trial_9_g0_2	0	7.1804179487128
111	main-effect	BR	2020-08-28_BR_signal/BR_trial_1_g0_2	0	7.19649911328987
112	main-effect	BR	2020-08-28_BR_signal/BR_trial_2_g0_2	1	8.18067969787055
113	main-effect	BR	2020-08-28_BR_signal/BR_trial_3_g0_2	0	7.36461999542962
114	main-effect	BR	2020-08-28_BR_signal/BR_trial_4_g0_2	1	7.73407195618167
115	main-effect	BR	2020-08-28_BR_signal/BR_trial_5_g0_2	0	7.56913380969531
116	main-effect	BR	2020-08-28_BR_signal/BR_trial_6_g0_2	1	7.15802602579437
117	main-effect	TL	2020-08-28_TL_signal/TL_trial_1_g0_2	0	7.73275457680933
118	main-effect	TL	2020-08-28_TL_signal/TL_trial_2_g0_2	1	8.21521746070715
119	main-effect	TL	2020-08-28_TL_signal/TL_trial_3_g0_2	0	7.61483726512053
120	main-effect	TL	2020-08-28_TL_signal/TL_trial_4_g0_2	1	8.01560148785279
121	main-effect	TL	2020-08-28_TL_signal/TL_trial_5_g0_2	0	7.16540164348751
122	main-effect	TL	2020-08-28_TL_signal/TL_trial_6_g0_2	1	7.89509450249653
123	main-effect	TL	2020-08-28_TL_signal/TL_trial_7_g0_2	0	7.2622272175585
124	main-effect	TL	2020-08-28_TL_signal/TL_trial_8_g0_2	1	7.17904906715266
125	main-effect	TL	2020-08-29_TL_signal/TL_trial_1_g0_2	0	7.93226404213724
126	main-effect	TL	2020-08-29_TL_signal/TL_trial_2_g0_2	1	8.47745962700603
127	main-effect	TL	2020-08-29_TL_signal/TL_trial_3_g0_2	0	7.80188958082531
128	main-effect	TL	2020-08-29_TL_signal/TL_trial_4_g0_2	1	8.31040316223037
129	main-effect	TL	2020-08-29_TL_signal/TL_trial_5_g0_2	0	7.88840910248183
130	main-effect	TL	2020-08-29_TL_signal/TL_trial_6_g0_2	1	8.23341697049073
131	main-effect	TL	2020-08-29_TL_signal/TL_trial_7_g0_2	0	7.52963077500466
132	main-effect	TL	2020-08-29_TL_signal/TL_trial_8_g0_2	1	8.35680587577337
133	main-effect	TL	2020-08-29_TL_signal/TL_trial_9_g0_2	0	7.30325191462453
134	main-effect	TL	2020-08-29_TL_signal/TL_trial_10_g0_2	1	8.01365909860944
135	gfp-control	OS	2020-08-24_OS_signal/OS_trial_3_g0_2	0	7.76466121596557
136	gfp-control	OS	2020-08-24_OS_signal/OS_trial_7_g0_2	0	7.58055197060888
137	gfp-control	OS	2020-08-24_OS_signal/OS_trial_8_g0_2	1	8.90584367686141
138	gfp-control	OS	2020-08-24_OS_signal/OS_trial_9_g0_2	0	8.0276134739616
139	gfp-control	OS	2020-08-24_OS_signal/OS_trial_10_g0_2	1	8.64877475177113
140	gfp-control	GD	2020-08-24_GD_signal/GD_trial_1_g0_2	0	7.70400284713792
141	gfp-control	GD	2020-08-24_GD_signal/GD_trial_2_g0_2	1	7.90338178940433
142	gfp-control	OS	2020-08-25_OS_signal/OS_trial_2_g0_2	1	8.63834520443316
143	gfp-control	OS	2020-08-25_OS_signal/OS_trial_3_g0_2	0	7.56193359483279
144	gfp-control	OS	2020-08-25_OS_signal/OS_trial_4_g0_2	1	8.67153640840387
145	gfp-control	OS	2020-08-25_OS_signal/OS_trial_5_g0_2	0	8.07264402928416
146	gfp-control	OS	2020-08-25_OS_signal/OS_trial_7_g0_2	0	7.43125124277085
147	gfp-control	OS	2020-08-25_OS_signal/OS_trial_8_g0_2	1	8.54378054450396
148	gfp-control	OS	2020-08-25_OS_signal/OS_trial_9_g0_2	0	8.63423479556068
149	gfp-control	GD	2020-08-25_GD_signal/GD_trial_1_g0_2	0	7.59604114627032
150	gfp-control	GD	2020-08-25_GD_signal/GD_trial_2_g0_2	1	7.96753510689047
151	gfp-control	GD	2020-08-25_GD_signal/GD_trial_3_g0_2	0	7.27429882597058
152	gfp-control	GD	2020-08-25_GD_signal/GD_trial_4_g0_2	1	8.15388842181016
153	gfp-control	GD	2020-08-25_GD_signal/GD_trial_6_g0_2	1	7.51478966484537
154	gfp-control	GD	2020-08-25_GD_signal/GD_trial_8_g0_2	1	7.68379137854613
155	gfp-control	GD	2020-08-25_GD_signal/GD_trial_9_g0_2	0	8.04209603718865
156	gfp-control	OS	2020-08-26_OS_signal/OS_trial_1_g0_2	0	8.20634948780794
157	gfp-control	OS	2020-08-26_OS_signal/OS_trial_7_g0_2	0	7.7778393133103
158	gfp-control	OS	2020-08-26_OS_signal/OS_trial_8_g0_2	1	8.53311653584546
159	gfp-control	OS	2020-08-26_OS_signal/OS_trial_9_g0_2	0	7.66077745736503
160	gfp-control	OS	2020-08-26_OS_signal/OS_trial_10_g0_2	1	8.39067845629803
161	gfp-control	GD	2020-08-26_GD_signal/GD_trial_2_g0_2	1	7.38952452417451
162	gfp-control	GD	2020-08-26_GD_signal/GD_trial_3_g0_2	0	7.53606353988891
163	gfp-control	GD	2020-08-26_GD_signal/GD_trial_10_g0_2	1	7.57337179359215
164	gfp-control	OS	2020-08-27_OS_signal/OS_trial_1_g0_2	0	7.71223538918306
165	gfp-control	OS	2020-08-27_OS_signal/OS_trial_2_g0_2	1	8.82625651761198
166	gfp-control	OS	2020-08-27_OS_signal/OS_trial_3_g0_2	0	7.93698314014909
167	gfp-control	OS	2020-08-27_OS_signal/OS_trial_4_g0_2	1	8.62819789763368
168	gfp-control	OS	2020-08-27_OS_signal/OS_trial_5_g0_2	0	7.80271920205864
169	gfp-control	OS	2020-08-27_OS_signal/OS_trial_7_g0_2	0	7.61704995505889
170	gfp-control	OS	2020-08-27_OS_signal/OS_trial_8_g0_2	1	8.55971284684859
171	gfp-control	OS	2020-08-27_OS_signal/OS_trial_9_g0_2	0	8.02204463868987
172	gfp-control	OS	2020-08-27_OS_signal/OS_trial_10_g0_2	1	8.81405882010289
173	gfp-control	GD	2020-08-27_GD_signal/GD_trial_1_g0_2	0	7.56046609489302
174	gfp-control	GD	2020-08-27_GD_signal/GD_trial_2_g0_2	1	7.88742343418625
175	gfp-control	GD	2020-08-27_GD_signal/GD_trial_6_g0_2	1	8.10401827854927
176	gfp-control	GD	2020-08-27_GD_signal/GD_trial_8_g0_2	1	7.67361465633354
177	gfp-control	OS	2020-08-28_OS_signal/OS_trial_1_g0_2	0	7.45808481383317
178	gfp-control	OS	2020-08-28_OS_signal/OS_trial_2_g0_2	1	8.27979862560517
179	gfp-control	OS	2020-08-28_OS_signal/OS_trial_3_g0_2	0	7.48661441079137
180	gfp-control	OS	2020-08-28_OS_signal/OS_trial_4_g0_2	1	8.93856077845393
181	gfp-control	OS	2020-08-28_OS_signal/OS_trial_5_g0_2	0	7.62140210741175
182	gfp-control	OS	2020-08-28_OS_signal/OS_trial_6_g0_2	1	8.45053530204884
183	gfp-control	OS	2020-08-28_OS_signal/OS_trial_7_g0_2	0	7.74659893695035
184	gfp-control	OS	2020-08-28_OS_signal/OS_trial_8_g0_2	1	8.01024659358842
185	gfp-control	GD	2020-08-28_GD_signal/GD_trial_2_g0_2	1	7.57154181891493
186	gfp-control	GD	2020-08-28_GD_signal/GD_trial_9_g0_2	0	7.656496157807
187	gfp-control	GD	2020-08-28_GD_signal/GD_trial_10_g0_2	1	7.33779909849506
188	gfp-control	OS	2020-08-29_OS_signal/OS_trial_3_g0_2	0	7.67398545445089
189	gfp-control	OS	2020-08-29_OS_signal/OS_trial_4_g0_2	1	8.20867857161531
190	gfp-control	OS	2020-08-29_OS_signal/OS_trial_5_g0_2	0	7.73879522932084
191	gfp-control	OS	2020-08-29_OS_signal/OS_trial_8_g0_2	1	8.34796099852962
192	gfp-control	OS	2020-08-29_OS_signal/OS_trial_9_g0_2	0	7.47993698722077
193	gfp-control	OS	2020-08-29_OS_signal/OS_trial_10_g0_2	1	8.5788679479407
194	gfp-control	GD	2020-08-29_GD_signal/GD_trial_1_g0_2	0	7.59928443477307
195	gfp-control	GD	2020-08-29_GD_signal/GD_trial_2_g0_2	1	7.89635991193785
196	gfp-control	GD	2020-08-29_GD_signal/GD_trial_6_g0_2	1	7.53243332790667
197	gfp-control	GD	2020-08-29_GD_signal/GD_trial_8_g0_2	1	7.71212889784174
198	gfp-control	GD	2020-08-29_GD_signal/GD_trial_9_g0_2	0	7.64425824471008
199	gfp-control	GD	2020-08-29_GD_signal/GD_trial_10_g0_2	1	7.67055712562844
