# Supplementary material for: Make Friends With The Googlebot
Source: eLife journal article supplement (doi:10.7554/elife.65998), 2005-03-14
Supplement: supp [file elife-65998-supp-v1.zip › elife_poa_e65998_Figure_3_source_data_3.csv]

	exp	animal	trial_id	laserOn	pow_slow_gamma
1	main-effect	PT	2019-11-06_PT_signal/PT_trial_4_g0_2	1	0.249224032110291
2	main-effect	PT	2019-11-06_PT_signal/PT_trial_5_g0_2	0	0.386540256482439
3	main-effect	PT	2019-11-06_PT_signal/PT_trial_8_g0_2	1	0.441076992993464
4	main-effect	OS	2019-11-06_OS_signal/OS_trial_3_g0_2	0	0.401002256385152
5	main-effect	OS	2019-11-06_OS_signal/OS_trial_6_g0_2	1	0.34273192445951
6	main-effect	OS	2019-11-06_OS_signal/OS_trial_10_g0_2	1	0.337552779795039
7	main-effect	BS	2019-11-06_BS_signal/BS_trial_2_g0_2	1	0.360602927566343
8	main-effect	PT	2019-11-07_PT_signal/PT_trial_3_g0_2	0	0.396262572296092
9	main-effect	PT	2019-11-07_PT_signal/PT_trial_4_g0_2	1	0.404330636463277
10	main-effect	PT	2019-11-07_PT_signal/PT_trial_5_g0_2	0	0.383593495084248
11	main-effect	PT	2019-11-07_PT_signal/PT_trial_9_g0_2	0	0.370707600816408
12	main-effect	BS	2019-11-07_BS_signal/BS_trial_3_g0_2	0	0.401417300897856
13	main-effect	BS	2019-11-07_BS_signal/BS_trial_4_g0_2	1	0.504947746016009
14	main-effect	BS	2019-11-07_BS_signal/BS_trial_8_g0_2	1	0.452275658266655
15	main-effect	BS	2019-11-07_BS_signal/BS_trial_10_g0_2	1	0.526327022432914
16	main-effect	PT	2019-11-08_PT_signal/PT_trial_3_g0_2	0	0.425584714542679
17	main-effect	PT	2019-11-08_PT_signal/PT_trial_6_g0_2	0	0.291690400681838
18	main-effect	PT	2019-11-08_PT_signal/PT_trial_9_g0_2	0	0.388975676918894
19	main-effect	BS	2019-11-08_BS_signal/BS_trial_1_g0_2	0	0.412863875221702
20	main-effect	BS	2019-11-08_BS_signal/BS_trial_7_g0_2	0	0.432932425715773
21	main-effect	BS	2019-11-08_BS_signal/BS_trial_9_g0_2	0	0.570059323384507
22	main-effect	BS	2019-11-08_BS_signal/BS_trial_10_g0_2	0	0.418422237787474
23	main-effect	OS	2019-11-11_OS_signal/OS_trial_6_g0_2	1	0.37436985287126
24	main-effect	OS	2019-11-11_OS_signal/OS_trial_10_g0_2	1	0.338041078447816
25	main-effect	BS	2019-11-11_BS_signal/BS_trial_2_g0_2	1	0.539044532230063
26	main-effect	BS	2019-11-11_BS_signal/BS_trial_7_g0_2	0	0.442868074390399
27	main-effect	BS	2019-11-11_BS_signal/BS_trial_8_g0_2	1	0.471389459855938
28	main-effect	BS	2019-11-11_BS_signal/BS_trial_9_g0_2	0	0.373181021879711
29	main-effect	BS	2019-11-11_BS_signal/BS_trial_10_g0_2	1	0.454096038224939
30	main-effect	PT	2019-11-12_PT_signal/PT_trial_2_g0_2	1	0.416696280540785
31	main-effect	PT	2019-11-12_PT_signal/PT_trial_5_g0_2	0	0.373262832061661
32	main-effect	PT	2019-11-12_PT_signal/PT_trial_7_g0_2	0	0.297323759558659
33	main-effect	PT	2019-11-12_PT_signal/PT_trial_9_g0_2	0	0.227309685611018
34	main-effect	PT	2019-11-12_PT_signal/PT_trial_10_g0_2	1	0.361128452820182
35	main-effect	OS	2019-11-12_OS_signal/OS_trial_9_g0_2	0	0.234181482552827
36	main-effect	BS	2019-11-12_BS_signal/BS_trial_2_g0_2	1	0.456049102583346
37	main-effect	BS	2019-11-12_BS_signal/BS_trial_7_g0_2	0	0.386454666416279
38	main-effect	BS	2019-11-12_BS_signal/BS_trial_8_g0_2	1	0.561577599841097
39	main-effect	BS	2019-11-12_BS_signal/BS_trial_10_g0_2	1	0.521620618777209
40	main-effect	PT	2019-11-13_PT_signal/PT_trial_1_g0_2	0	0.351056873172015
41	main-effect	PT	2019-11-13_PT_signal/PT_trial_2_g0_2	1	0.30551100983399
42	main-effect	PT	2019-11-13_PT_signal/PT_trial_3_g0_2	0	0.296620228124055
43	main-effect	PT	2019-11-13_PT_signal/PT_trial_4_g0_2	1	0.294651180981142
44	main-effect	PT	2019-11-13_PT_signal/PT_trial_5_g0_2	0	0.181167661829303
45	main-effect	PT	2019-11-13_PT_signal/PT_trial_6_g0_2	1	0.401948438857704
46	main-effect	PT	2019-11-13_PT_signal/PT_trial_7_g0_2	0	0.354439621030427
47	main-effect	PT	2019-11-13_PT_signal/PT_trial_8_g0_2	1	0.321181003736383
48	main-effect	PT	2019-11-13_PT_signal/PT_trial_9_g0_2	0	0.24458711386101
49	main-effect	OS	2019-11-13_OS_signal/OS_trial_2_g0_2	1	0.166030391995747
50	main-effect	OS	2019-11-13_OS_signal/OS_trial_3_g0_2	0	0.216712984166232
51	main-effect	OS	2019-11-13_OS_signal/OS_trial_4_g0_2	1	0.303896665019897
52	main-effect	OS	2019-11-13_OS_signal/OS_trial_5_g0_2	0	0.244572105728633
53	main-effect	OS	2019-11-13_OS_signal/OS_trial_7_g0_2	0	0.171248238240215
54	main-effect	OS	2019-11-13_OS_signal/OS_trial_8_g0_2	1	0.15222077300226
55	main-effect	OS	2019-11-13_OS_signal/OS_trial_9_g0_2	0	0.176101748995865
56	main-effect	BS	2019-11-13_BS_signal/BS_trial_1_g0_2	0	0.415941633599089
57	main-effect	BS	2019-11-13_BS_signal/BS_trial_2_g0_2	1	0.392291525944702
58	main-effect	BS	2019-11-13_BS_signal/BS_trial_3_g0_2	0	0.349557200709168
59	main-effect	BS	2019-11-13_BS_signal/BS_trial_5_g0_2	0	0.475316252204741
60	main-effect	BS	2019-11-13_BS_signal/BS_trial_6_g0_2	1	0.510094415702626
61	main-effect	BS	2019-11-13_BS_signal/BS_trial_7_g0_2	0	0.382888519952619
62	main-effect	BS	2019-11-13_BS_signal/BS_trial_8_g0_2	1	0.524570704404002
63	main-effect	BS	2019-11-13_BS_signal/BS_trial_10_g0_2	1	0.420236348272637
64	main-effect	BR	2020-08-24_BR_signal/BR_trial_2_g0_2	1	0.235219118445261
65	main-effect	BR	2020-08-24_BR_signal/BR_trial_3_g0_2	0	0.369631359109405
66	main-effect	BR	2020-08-24_BR_signal/BR_trial_4_g0_2	1	0.366547789737221
67	main-effect	BR	2020-08-24_BR_signal/BR_trial_5_g0_2	0	0.379319153322256
68	main-effect	BR	2020-08-24_BR_signal/BR_trial_6_g0_2	1	0.188104725814946
69	main-effect	BR	2020-08-24_BR_signal/BR_trial_7_g0_2	0	0.362328858830578
70	main-effect	BR	2020-08-24_BR_signal/BR_trial_8_g0_2	1	0.170466173351095
71	main-effect	BR	2020-08-24_BR_signal/BR_trial_9_g0_2	0	0.24112067460949
72	main-effect	BR	2020-08-24_BR_signal/BR_trial_10_g0_2	1	0.275015170085372
73	main-effect	TL	2020-08-24_TL_signal/TL_trial_2_g0_2	1	0.493320404015954
74	main-effect	TL	2020-08-24_TL_signal/TL_trial_4_g0_2	1	0.475394920884152
75	main-effect	TL	2020-08-24_TL_signal/TL_trial_6_g0_2	1	0.350342101225138
76	main-effect	TL	2020-08-24_TL_signal/TL_trial_7_g0_2	0	0.319460114106653
77	main-effect	TL	2020-08-24_TL_signal/TL_trial_8_g0_2	1	0.452888315513348
78	main-effect	TL	2020-08-24_TL_signal/TL_trial_9_g0_2	0	0.492756613905553
79	main-effect	BR	2020-08-25_BR_signal/BR_trial_4_g0_2	1	0.301022541541897
80	main-effect	BR	2020-08-25_BR_signal/BR_trial_7_g0_2	0	0.347661093632451
81	main-effect	BR	2020-08-25_BR_signal/BR_trial_8_g0_2	1	0.379583905704549
82	main-effect	BR	2020-08-25_BR_signal/BR_trial_9_g0_2	0	0.302524158784509
83	main-effect	BR	2020-08-25_BR_signal/BR_trial_10_g0_2	1	0.255438306343973
84	main-effect	TL	2020-08-25_TL_signal/TL_trial_6_g0_2	0	0.41786767584523
85	main-effect	TL	2020-08-26_TL_signal/TL_trial_1_g0_2	0	0.554372561506793
86	main-effect	TL	2020-08-26_TL_signal/TL_trial_2_g0_2	1	0.487793209472638
87	main-effect	TL	2020-08-26_TL_signal/TL_trial_6_g0_2	1	0.402664504716675
88	main-effect	TL	2020-08-26_TL_signal/TL_trial_8_g0_2	1	0.439388650761178
89	main-effect	TL	2020-08-26_TL_signal/TL_trial_9_g0_2	0	0.434835292898777
90	main-effect	BR	2020-08-27_BR_signal/BR_trial_1_g0_2	0	0.362724578821833
91	main-effect	BR	2020-08-27_BR_signal/BR_trial_3_g0_2	0	0.30184890520375
92	main-effect	BR	2020-08-27_BR_signal/BR_trial_4_g0_2	1	0.361552188790073
93	main-effect	BR	2020-08-27_BR_signal/BR_trial_5_g0_2	0	0.23196757921122
94	main-effect	BR	2020-08-27_BR_signal/BR_trial_6_g0_2	1	0.362518054945467
95	main-effect	BR	2020-08-27_BR_signal/BR_trial_7_g0_2	0	0.349561886588951
96	main-effect	BR	2020-08-27_BR_signal/BR_trial_8_g0_2	1	0.201690246735901
97	main-effect	BR	2020-08-27_BR_signal/BR_trial_10_g0_2	1	0.204159523093384
98	main-effect	TL	2020-08-27_TL_signal/TL_trial_2_g0_2	1	0.447291586668075
99	main-effect	TL	2020-08-27_TL_signal/TL_trial_3_g0_2	0	0.433734265595493
100	main-effect	TL	2020-08-27_TL_signal/TL_trial_4_g0_2	1	0.481464198657509
101	main-effect	TL	2020-08-27_TL_signal/TL_trial_5_g0_2	0	0.477544620666197
102	main-effect	TL	2020-08-27_TL_signal/TL_trial_6_g0_2	1	0.534261776611078
103	main-effect	TL	2020-08-27_TL_signal/TL_trial_7_g0_2	0	0.451592841944038
104	main-effect	TL	2020-08-27_TL_signal/TL_trial_8_g0_2	1	0.628884191151504
105	main-effect	TL	2020-08-27_TL_signal/TL_trial_9_g0_2	0	0.44058378516302
106	main-effect	BR	2020-08-28_BR_signal/BR_trial_1_g0_2	0	0.374841144012482
107	main-effect	BR	2020-08-28_BR_signal/BR_trial_2_g0_2	1	0.223415734058953
108	main-effect	BR	2020-08-28_BR_signal/BR_trial_3_g0_2	0	0.239993244583786
109	main-effect	BR	2020-08-28_BR_signal/BR_trial_4_g0_2	1	0.275114144683476
110	main-effect	BR	2020-08-28_BR_signal/BR_trial_5_g0_2	0	0.222713749083925
111	main-effect	BR	2020-08-28_BR_signal/BR_trial_6_g0_2	1	0.265025652033009
112	main-effect	TL	2020-08-28_TL_signal/TL_trial_1_g0_2	0	0.527591556993028
113	main-effect	TL	2020-08-28_TL_signal/TL_trial_2_g0_2	1	0.553260908016688
114	main-effect	TL	2020-08-28_TL_signal/TL_trial_3_g0_2	0	0.462253718338324
115	main-effect	TL	2020-08-28_TL_signal/TL_trial_4_g0_2	1	0.508195694660786
116	main-effect	TL	2020-08-28_TL_signal/TL_trial_5_g0_2	0	0.428326862797419
117	main-effect	TL	2020-08-28_TL_signal/TL_trial_6_g0_2	1	0.506616474035158
118	main-effect	TL	2020-08-28_TL_signal/TL_trial_7_g0_2	0	0.439710746923899
119	main-effect	TL	2020-08-28_TL_signal/TL_trial_8_g0_2	1	0.47928852839256
120	main-effect	TL	2020-08-29_TL_signal/TL_trial_1_g0_2	0	0.559913102583399
121	main-effect	TL	2020-08-29_TL_signal/TL_trial_2_g0_2	1	0.559351343800992
122	main-effect	TL	2020-08-29_TL_signal/TL_trial_3_g0_2	0	0.463272945401384
123	main-effect	TL	2020-08-29_TL_signal/TL_trial_4_g0_2	1	0.449612829035457
124	main-effect	TL	2020-08-29_TL_signal/TL_trial_5_g0_2	0	0.46332350245437
125	main-effect	TL	2020-08-29_TL_signal/TL_trial_6_g0_2	1	0.476786876489852
126	main-effect	TL	2020-08-29_TL_signal/TL_trial_7_g0_2	0	0.403364097000541
127	main-effect	TL	2020-08-29_TL_signal/TL_trial_8_g0_2	1	0.418467203830031
128	main-effect	TL	2020-08-29_TL_signal/TL_trial_9_g0_2	0	0.491928585007549
129	main-effect	TL	2020-08-29_TL_signal/TL_trial_10_g0_2	1	0.545668287833758
130	gfp-control	OS	2020-08-24_OS_signal/OS_trial_7_g0_2	0	0.37601343235159
131	gfp-control	OS	2020-08-24_OS_signal/OS_trial_8_g0_2	1	0.352677320778205
132	gfp-control	OS	2020-08-24_OS_signal/OS_trial_9_g0_2	0	0.344583186009616
133	gfp-control	GD	2020-08-24_GD_signal/GD_trial_1_g0_2	0	0.299863226644654
134	gfp-control	GD	2020-08-24_GD_signal/GD_trial_2_g0_2	1	0.337785088912796
135	gfp-control	OS	2020-08-25_OS_signal/OS_trial_2_g0_2	1	0.423207256463743
136	gfp-control	OS	2020-08-25_OS_signal/OS_trial_3_g0_2	0	0.38307433327506
137	gfp-control	OS	2020-08-25_OS_signal/OS_trial_4_g0_2	1	0.331451259788544
138	gfp-control	OS	2020-08-25_OS_signal/OS_trial_5_g0_2	0	0.327031551295215
139	gfp-control	OS	2020-08-25_OS_signal/OS_trial_7_g0_2	0	0.437374498052773
140	gfp-control	OS	2020-08-25_OS_signal/OS_trial_8_g0_2	1	0.376799451351141
141	gfp-control	OS	2020-08-25_OS_signal/OS_trial_9_g0_2	0	0.41933548760459
142	gfp-control	GD	2020-08-25_GD_signal/GD_trial_2_g0_2	1	0.264215228957632
143	gfp-control	GD	2020-08-25_GD_signal/GD_trial_4_g0_2	1	0.264874382665239
144	gfp-control	GD	2020-08-25_GD_signal/GD_trial_6_g0_2	1	0.315949589225772
145	gfp-control	GD	2020-08-25_GD_signal/GD_trial_8_g0_2	1	0.414413363980914
146	gfp-control	GD	2020-08-25_GD_signal/GD_trial_9_g0_2	0	0.231548231090464
147	gfp-control	OS	2020-08-26_OS_signal/OS_trial_8_g0_2	1	0.386921507170784
148	gfp-control	OS	2020-08-26_OS_signal/OS_trial_10_g0_2	1	0.336834039245759
149	gfp-control	GD	2020-08-26_GD_signal/GD_trial_2_g0_2	1	0.219023120688827
150	gfp-control	GD	2020-08-26_GD_signal/GD_trial_3_g0_2	0	0.498780499821956
151	gfp-control	OS	2020-08-27_OS_signal/OS_trial_2_g0_2	1	0.353679982072845
152	gfp-control	OS	2020-08-27_OS_signal/OS_trial_3_g0_2	0	0.433303581824053
153	gfp-control	OS	2020-08-27_OS_signal/OS_trial_4_g0_2	1	0.331227612065979
154	gfp-control	OS	2020-08-27_OS_signal/OS_trial_5_g0_2	0	0.375014616112715
155	gfp-control	OS	2020-08-27_OS_signal/OS_trial_7_g0_2	0	0.393359163635378
156	gfp-control	OS	2020-08-27_OS_signal/OS_trial_10_g0_2	1	0.367137172461176
157	gfp-control	GD	2020-08-27_GD_signal/GD_trial_6_g0_2	1	0.342888847071915
158	gfp-control	GD	2020-08-27_GD_signal/GD_trial_8_g0_2	1	0.288862927960785
159	gfp-control	OS	2020-08-28_OS_signal/OS_trial_1_g0_2	0	0.371678877311211
160	gfp-control	OS	2020-08-28_OS_signal/OS_trial_2_g0_2	1	0.33371478778461
161	gfp-control	OS	2020-08-28_OS_signal/OS_trial_6_g0_2	1	0.318877376706095
162	gfp-control	GD	2020-08-28_GD_signal/GD_trial_2_g0_2	1	0.429946596611127
163	gfp-control	GD	2020-08-28_GD_signal/GD_trial_9_g0_2	0	0.326967724976088
164	gfp-control	GD	2020-08-28_GD_signal/GD_trial_10_g0_2	1	0.277254948368047
165	gfp-control	OS	2020-08-29_OS_signal/OS_trial_3_g0_2	0	0.43663198414325
166	gfp-control	OS	2020-08-29_OS_signal/OS_trial_4_g0_2	1	0.547502740843042
167	gfp-control	OS	2020-08-29_OS_signal/OS_trial_5_g0_2	0	0.320336104517486
168	gfp-control	OS	2020-08-29_OS_signal/OS_trial_8_g0_2	1	0.445490040553661
169	gfp-control	OS	2020-08-29_OS_signal/OS_trial_9_g0_2	0	0.425396573002676
170	gfp-control	GD	2020-08-29_GD_signal/GD_trial_1_g0_2	0	0.532134960403525
171	gfp-control	GD	2020-08-29_GD_signal/GD_trial_2_g0_2	1	0.352936093862627
172	gfp-control	GD	2020-08-29_GD_signal/GD_trial_6_g0_2	1	0.429424173269743
173	gfp-control	GD	2020-08-29_GD_signal/GD_trial_8_g0_2	1	0.337805224111769
174	gfp-control	GD	2020-08-29_GD_signal/GD_trial_9_g0_2	0	0.304592979636626
175	gfp-control	GD	2020-08-29_GD_signal/GD_trial_10_g0_2	1	0.233937570002369
