# Supplementary material for: Make Friends With The Googlebot
Source: eLife journal article supplement (doi:10.7554/elife.65998), 2005-03-14
Supplement: supp [file elife-65998-supp-v1.zip › elife_poa_e65998_Figure_3_source_data_4.csv]

	exp	animal	trial_id	laserOn	background_auc
1	main-effect	PT	2019-11-06_PT_signal/PT_trial_4_g0_2	1	-6.52906295168577
2	main-effect	PT	2019-11-06_PT_signal/PT_trial_5_g0_2	0	-6.47703279584232
3	main-effect	PT	2019-11-06_PT_signal/PT_trial_8_g0_2	1	-6.57657588679677
4	main-effect	OS	2019-11-06_OS_signal/OS_trial_3_g0_2	0	-5.9417177301392
5	main-effect	OS	2019-11-06_OS_signal/OS_trial_6_g0_2	1	-5.97822218004632
6	main-effect	OS	2019-11-06_OS_signal/OS_trial_10_g0_2	1	-5.94405999543085
7	main-effect	BS	2019-11-06_BS_signal/BS_trial_2_g0_2	1	-5.61767765681344
8	main-effect	PT	2019-11-07_PT_signal/PT_trial_3_g0_2	0	-6.56127596463972
9	main-effect	PT	2019-11-07_PT_signal/PT_trial_4_g0_2	1	-6.56396492031894
10	main-effect	PT	2019-11-07_PT_signal/PT_trial_5_g0_2	0	-6.55216111665231
11	main-effect	PT	2019-11-07_PT_signal/PT_trial_9_g0_2	0	-6.51195935983026
12	main-effect	BS	2019-11-07_BS_signal/BS_trial_3_g0_2	0	-5.4166984050587
13	main-effect	BS	2019-11-07_BS_signal/BS_trial_4_g0_2	1	-5.48337769089858
14	main-effect	BS	2019-11-07_BS_signal/BS_trial_5_g0_2	0	-5.46101542364107
15	main-effect	BS	2019-11-07_BS_signal/BS_trial_8_g0_2	1	-5.44508426576272
16	main-effect	BS	2019-11-07_BS_signal/BS_trial_9_g0_2	0	-5.44974618274534
17	main-effect	BS	2019-11-07_BS_signal/BS_trial_10_g0_2	1	-5.55802055039197
18	main-effect	PT	2019-11-08_PT_signal/PT_trial_3_g0_2	0	-6.65038889655557
19	main-effect	PT	2019-11-08_PT_signal/PT_trial_6_g0_2	0	-6.56092421007259
20	main-effect	PT	2019-11-08_PT_signal/PT_trial_9_g0_2	0	-6.59567678961429
21	main-effect	BS	2019-11-08_BS_signal/BS_trial_1_g0_2	0	-5.4541275381784
22	main-effect	BS	2019-11-08_BS_signal/BS_trial_2_g0_2	0	-5.40122959455454
23	main-effect	BS	2019-11-08_BS_signal/BS_trial_7_g0_2	0	-5.46048130930137
24	main-effect	BS	2019-11-08_BS_signal/BS_trial_9_g0_2	0	-5.45356775871022
25	main-effect	BS	2019-11-08_BS_signal/BS_trial_10_g0_2	0	-5.48109724610151
26	main-effect	OS	2019-11-11_OS_signal/OS_trial_6_g0_2	1	-5.89566489581671
27	main-effect	OS	2019-11-11_OS_signal/OS_trial_10_g0_2	1	-5.89276816130621
28	main-effect	BS	2019-11-11_BS_signal/BS_trial_2_g0_2	1	-5.50769164490907
29	main-effect	BS	2019-11-11_BS_signal/BS_trial_7_g0_2	0	-5.50640549300681
30	main-effect	BS	2019-11-11_BS_signal/BS_trial_8_g0_2	1	-5.48336535202344
31	main-effect	BS	2019-11-11_BS_signal/BS_trial_9_g0_2	0	-5.44281323400907
32	main-effect	BS	2019-11-11_BS_signal/BS_trial_10_g0_2	1	-5.53611743526272
33	main-effect	PT	2019-11-12_PT_signal/PT_trial_2_g0_2	1	-6.59612034895861
34	main-effect	PT	2019-11-12_PT_signal/PT_trial_5_g0_2	0	-6.55553445671654
35	main-effect	PT	2019-11-12_PT_signal/PT_trial_7_g0_2	0	-6.54671222645953
36	main-effect	PT	2019-11-12_PT_signal/PT_trial_9_g0_2	0	-6.52368430631697
37	main-effect	PT	2019-11-12_PT_signal/PT_trial_10_g0_2	1	-6.61661736523467
38	main-effect	OS	2019-11-12_OS_signal/OS_trial_9_g0_2	0	-5.87820109467378
39	main-effect	BS	2019-11-12_BS_signal/BS_trial_2_g0_2	1	-5.45689446209809
40	main-effect	BS	2019-11-12_BS_signal/BS_trial_3_g0_2	0	-5.38823858796042
41	main-effect	BS	2019-11-12_BS_signal/BS_trial_5_g0_2	0	-5.47456977800312
42	main-effect	BS	2019-11-12_BS_signal/BS_trial_7_g0_2	0	-5.43078640846568
43	main-effect	BS	2019-11-12_BS_signal/BS_trial_8_g0_2	1	-5.54930024286648
44	main-effect	BS	2019-11-12_BS_signal/BS_trial_10_g0_2	1	-5.52777392488542
45	main-effect	PT	2019-11-13_PT_signal/PT_trial_1_g0_2	0	-6.55678439865846
46	main-effect	PT	2019-11-13_PT_signal/PT_trial_2_g0_2	1	-6.64885990320045
47	main-effect	PT	2019-11-13_PT_signal/PT_trial_3_g0_2	0	-6.58879041171178
48	main-effect	PT	2019-11-13_PT_signal/PT_trial_4_g0_2	1	-6.61732555664923
49	main-effect	PT	2019-11-13_PT_signal/PT_trial_5_g0_2	0	-6.27399407193002
50	main-effect	PT	2019-11-13_PT_signal/PT_trial_6_g0_2	1	-6.64251801428082
51	main-effect	PT	2019-11-13_PT_signal/PT_trial_7_g0_2	0	-6.58080894334449
52	main-effect	PT	2019-11-13_PT_signal/PT_trial_8_g0_2	1	-6.46195165727102
53	main-effect	PT	2019-11-13_PT_signal/PT_trial_9_g0_2	0	-6.54313561906872
54	main-effect	OS	2019-11-13_OS_signal/OS_trial_2_g0_2	1	-5.96592007075549
55	main-effect	OS	2019-11-13_OS_signal/OS_trial_3_g0_2	0	-5.93346596094278
56	main-effect	OS	2019-11-13_OS_signal/OS_trial_4_g0_2	1	-5.89460547283755
57	main-effect	OS	2019-11-13_OS_signal/OS_trial_5_g0_2	0	-5.87879164953404
58	main-effect	OS	2019-11-13_OS_signal/OS_trial_7_g0_2	0	-5.88420672966714
59	main-effect	OS	2019-11-13_OS_signal/OS_trial_8_g0_2	1	-5.54218526027421
60	main-effect	OS	2019-11-13_OS_signal/OS_trial_9_g0_2	0	-5.90188010770612
61	main-effect	BS	2019-11-13_BS_signal/BS_trial_1_g0_2	0	-5.55586929107022
62	main-effect	BS	2019-11-13_BS_signal/BS_trial_2_g0_2	1	-5.48803445631989
63	main-effect	BS	2019-11-13_BS_signal/BS_trial_3_g0_2	0	-5.39291329718361
64	main-effect	BS	2019-11-13_BS_signal/BS_trial_5_g0_2	0	-5.46354379189881
65	main-effect	BS	2019-11-13_BS_signal/BS_trial_6_g0_2	1	-5.44891594629757
66	main-effect	BS	2019-11-13_BS_signal/BS_trial_7_g0_2	0	-5.43306257469158
67	main-effect	BS	2019-11-13_BS_signal/BS_trial_8_g0_2	1	-5.46816817388935
68	main-effect	BS	2019-11-13_BS_signal/BS_trial_9_g0_2	0	-5.44834453116118
69	main-effect	BS	2019-11-13_BS_signal/BS_trial_10_g0_2	1	-5.5191296901346
70	main-effect	BR	2020-08-24_BR_signal/BR_trial_2_g0_2	1	-6.26042537873974
71	main-effect	BR	2020-08-24_BR_signal/BR_trial_3_g0_2	0	-6.24896929355077
72	main-effect	BR	2020-08-24_BR_signal/BR_trial_4_g0_2	1	-6.27643151721412
73	main-effect	BR	2020-08-24_BR_signal/BR_trial_5_g0_2	0	-6.2762519798377
74	main-effect	BR	2020-08-24_BR_signal/BR_trial_6_g0_2	1	-6.25310175073406
75	main-effect	BR	2020-08-24_BR_signal/BR_trial_7_g0_2	0	-6.30115568745805
76	main-effect	BR	2020-08-24_BR_signal/BR_trial_8_g0_2	1	-6.29362632834273
77	main-effect	BR	2020-08-24_BR_signal/BR_trial_9_g0_2	0	-6.25266531788668
78	main-effect	BR	2020-08-24_BR_signal/BR_trial_10_g0_2	1	-6.3095313653422
79	main-effect	TL	2020-08-24_TL_signal/TL_trial_2_g0_2	1	-6.15951890689831
80	main-effect	TL	2020-08-24_TL_signal/TL_trial_4_g0_2	1	-6.18620735012297
81	main-effect	TL	2020-08-24_TL_signal/TL_trial_6_g0_2	1	-6.14834353906571
82	main-effect	TL	2020-08-24_TL_signal/TL_trial_7_g0_2	0	-6.09752609704219
83	main-effect	TL	2020-08-24_TL_signal/TL_trial_8_g0_2	1	-6.13795108662754
84	main-effect	TL	2020-08-24_TL_signal/TL_trial_9_g0_2	0	-6.14877255293641
85	main-effect	BR	2020-08-25_BR_signal/BR_trial_4_g0_2	1	-6.25393193882599
86	main-effect	BR	2020-08-25_BR_signal/BR_trial_7_g0_2	0	-6.25337882323441
87	main-effect	BR	2020-08-25_BR_signal/BR_trial_8_g0_2	1	-6.27731086044099
88	main-effect	BR	2020-08-25_BR_signal/BR_trial_9_g0_2	0	-6.25412789611346
89	main-effect	BR	2020-08-25_BR_signal/BR_trial_10_g0_2	1	-6.27716774223137
90	main-effect	TL	2020-08-25_TL_signal/TL_trial_6_g0_2	0	-6.08938643240919
91	main-effect	TL	2020-08-26_TL_signal/TL_trial_1_g0_2	0	-6.18651467608009
92	main-effect	TL	2020-08-26_TL_signal/TL_trial_2_g0_2	1	-6.17381412843224
93	main-effect	TL	2020-08-26_TL_signal/TL_trial_6_g0_2	1	-6.11676920670385
94	main-effect	TL	2020-08-26_TL_signal/TL_trial_8_g0_2	1	-6.13127635375906
95	main-effect	TL	2020-08-26_TL_signal/TL_trial_9_g0_2	0	-6.10005121182951
96	main-effect	BR	2020-08-27_BR_signal/BR_trial_1_g0_2	0	-6.34207400547007
97	main-effect	BR	2020-08-27_BR_signal/BR_trial_2_g0_2	1	-6.34428568773848
98	main-effect	BR	2020-08-27_BR_signal/BR_trial_3_g0_2	0	-6.30058286409655
99	main-effect	BR	2020-08-27_BR_signal/BR_trial_4_g0_2	1	-6.3515028463998
100	main-effect	BR	2020-08-27_BR_signal/BR_trial_5_g0_2	0	-6.30226970629411
101	main-effect	BR	2020-08-27_BR_signal/BR_trial_6_g0_2	1	-6.34334656827588
102	main-effect	BR	2020-08-27_BR_signal/BR_trial_7_g0_2	0	-6.30737601369486
103	main-effect	BR	2020-08-27_BR_signal/BR_trial_8_g0_2	1	-6.31468275765951
104	main-effect	BR	2020-08-27_BR_signal/BR_trial_10_g0_2	1	-6.31653452110157
105	main-effect	TL	2020-08-27_TL_signal/TL_trial_2_g0_2	1	-6.17636864838897
106	main-effect	TL	2020-08-27_TL_signal/TL_trial_3_g0_2	0	-6.13888809595261
107	main-effect	TL	2020-08-27_TL_signal/TL_trial_4_g0_2	1	-6.17284882048216
108	main-effect	TL	2020-08-27_TL_signal/TL_trial_5_g0_2	0	-6.16756840801997
109	main-effect	TL	2020-08-27_TL_signal/TL_trial_6_g0_2	1	-6.19281092582673
110	main-effect	TL	2020-08-27_TL_signal/TL_trial_7_g0_2	0	-6.17680981211544
111	main-effect	TL	2020-08-27_TL_signal/TL_trial_8_g0_2	1	-6.19777323891736
112	main-effect	TL	2020-08-27_TL_signal/TL_trial_9_g0_2	0	-6.15376534516054
113	main-effect	BR	2020-08-28_BR_signal/BR_trial_1_g0_2	0	-6.3700604096482
114	main-effect	BR	2020-08-28_BR_signal/BR_trial_2_g0_2	1	-6.36504132980127
115	main-effect	BR	2020-08-28_BR_signal/BR_trial_3_g0_2	0	-6.33561221826795
116	main-effect	BR	2020-08-28_BR_signal/BR_trial_4_g0_2	1	-6.38838233989105
117	main-effect	BR	2020-08-28_BR_signal/BR_trial_5_g0_2	0	-6.32165257211102
118	main-effect	BR	2020-08-28_BR_signal/BR_trial_6_g0_2	1	-6.37640887765605
119	main-effect	TL	2020-08-28_TL_signal/TL_trial_1_g0_2	0	-6.23196705634484
120	main-effect	TL	2020-08-28_TL_signal/TL_trial_2_g0_2	1	-6.16640605546507
121	main-effect	TL	2020-08-28_TL_signal/TL_trial_3_g0_2	0	-6.18962795434356
122	main-effect	TL	2020-08-28_TL_signal/TL_trial_4_g0_2	1	-6.1430683813727
123	main-effect	TL	2020-08-28_TL_signal/TL_trial_5_g0_2	0	-6.18801292204233
124	main-effect	TL	2020-08-28_TL_signal/TL_trial_6_g0_2	1	-6.21886570630147
125	main-effect	TL	2020-08-28_TL_signal/TL_trial_7_g0_2	0	-6.18276167398227
126	main-effect	TL	2020-08-28_TL_signal/TL_trial_8_g0_2	1	-6.22793365421171
127	main-effect	TL	2020-08-29_TL_signal/TL_trial_1_g0_2	0	-6.12281450457562
128	main-effect	TL	2020-08-29_TL_signal/TL_trial_2_g0_2	1	-6.17411180200975
129	main-effect	TL	2020-08-29_TL_signal/TL_trial_3_g0_2	0	-6.08374288562248
130	main-effect	TL	2020-08-29_TL_signal/TL_trial_4_g0_2	1	-6.11677584533874
131	main-effect	TL	2020-08-29_TL_signal/TL_trial_5_g0_2	0	-6.08949991985145
132	main-effect	TL	2020-08-29_TL_signal/TL_trial_6_g0_2	1	-6.12149081635994
133	main-effect	TL	2020-08-29_TL_signal/TL_trial_7_g0_2	0	-6.10278176956479
134	main-effect	TL	2020-08-29_TL_signal/TL_trial_8_g0_2	1	-6.06787692917294
135	main-effect	TL	2020-08-29_TL_signal/TL_trial_9_g0_2	0	-6.08700449546143
136	main-effect	TL	2020-08-29_TL_signal/TL_trial_10_g0_2	1	-6.13192311864736
137	gfp-control	OS	2020-08-24_OS_signal/OS_trial_3_g0_2	0	-6.46053582895536
138	gfp-control	OS	2020-08-24_OS_signal/OS_trial_7_g0_2	0	-6.42685651068638
139	gfp-control	OS	2020-08-24_OS_signal/OS_trial_8_g0_2	1	-6.3839731718312
140	gfp-control	OS	2020-08-24_OS_signal/OS_trial_9_g0_2	0	-6.42329646021864
141	gfp-control	OS	2020-08-24_OS_signal/OS_trial_10_g0_2	1	-6.37384557851004
142	gfp-control	GD	2020-08-24_GD_signal/GD_trial_1_g0_2	0	-5.96391320975988
143	gfp-control	GD	2020-08-24_GD_signal/GD_trial_2_g0_2	1	-5.95394993277915
144	gfp-control	OS	2020-08-25_OS_signal/OS_trial_2_g0_2	1	-6.44228159444503
145	gfp-control	OS	2020-08-25_OS_signal/OS_trial_3_g0_2	0	-6.47125659810905
146	gfp-control	OS	2020-08-25_OS_signal/OS_trial_4_g0_2	1	-6.42522194055903
147	gfp-control	OS	2020-08-25_OS_signal/OS_trial_5_g0_2	0	-6.42300931946676
148	gfp-control	OS	2020-08-25_OS_signal/OS_trial_7_g0_2	0	-6.51253638231555
149	gfp-control	OS	2020-08-25_OS_signal/OS_trial_8_g0_2	1	-6.43497670891099
150	gfp-control	OS	2020-08-25_OS_signal/OS_trial_9_g0_2	0	-6.46935417546604
151	gfp-control	GD	2020-08-25_GD_signal/GD_trial_1_g0_2	0	-5.93121220350162
152	gfp-control	GD	2020-08-25_GD_signal/GD_trial_2_g0_2	1	-5.91763760607046
153	gfp-control	GD	2020-08-25_GD_signal/GD_trial_3_g0_2	0	-5.96185161516377
154	gfp-control	GD	2020-08-25_GD_signal/GD_trial_4_g0_2	1	-5.93073598919284
155	gfp-control	GD	2020-08-25_GD_signal/GD_trial_6_g0_2	1	-5.98805131196775
156	gfp-control	GD	2020-08-25_GD_signal/GD_trial_8_g0_2	1	-5.93666945802426
157	gfp-control	GD	2020-08-25_GD_signal/GD_trial_9_g0_2	0	-5.93032313547161
158	gfp-control	OS	2020-08-26_OS_signal/OS_trial_1_g0_2	0	-6.46532377225282
159	gfp-control	OS	2020-08-26_OS_signal/OS_trial_7_g0_2	0	-6.43288318238257
160	gfp-control	OS	2020-08-26_OS_signal/OS_trial_8_g0_2	1	-6.47188467241472
161	gfp-control	OS	2020-08-26_OS_signal/OS_trial_9_g0_2	0	-6.46462156333882
162	gfp-control	OS	2020-08-26_OS_signal/OS_trial_10_g0_2	1	-6.43088726879603
163	gfp-control	GD	2020-08-26_GD_signal/GD_trial_2_g0_2	1	-6.07414200194989
164	gfp-control	GD	2020-08-26_GD_signal/GD_trial_3_g0_2	0	-5.95407430303459
165	gfp-control	GD	2020-08-26_GD_signal/GD_trial_10_g0_2	1	-5.97730785755687
166	gfp-control	OS	2020-08-27_OS_signal/OS_trial_1_g0_2	0	-6.52271453168726
167	gfp-control	OS	2020-08-27_OS_signal/OS_trial_2_g0_2	1	-6.47849872124095
168	gfp-control	OS	2020-08-27_OS_signal/OS_trial_3_g0_2	0	-6.46998948627879
169	gfp-control	OS	2020-08-27_OS_signal/OS_trial_4_g0_2	1	-6.49227478403691
170	gfp-control	OS	2020-08-27_OS_signal/OS_trial_5_g0_2	0	-6.51172671205785
171	gfp-control	OS	2020-08-27_OS_signal/OS_trial_7_g0_2	0	-6.51684091199996
172	gfp-control	OS	2020-08-27_OS_signal/OS_trial_8_g0_2	1	-6.44816690814088
173	gfp-control	OS	2020-08-27_OS_signal/OS_trial_9_g0_2	0	-6.49081216884207
174	gfp-control	OS	2020-08-27_OS_signal/OS_trial_10_g0_2	1	-6.50094467765979
175	gfp-control	GD	2020-08-27_GD_signal/GD_trial_1_g0_2	0	-5.97519441031784
176	gfp-control	GD	2020-08-27_GD_signal/GD_trial_2_g0_2	1	-5.97322748831203
177	gfp-control	GD	2020-08-27_GD_signal/GD_trial_6_g0_2	1	-5.95007226831399
178	gfp-control	GD	2020-08-27_GD_signal/GD_trial_8_g0_2	1	-5.97100929665049
179	gfp-control	OS	2020-08-28_OS_signal/OS_trial_1_g0_2	0	-6.49151419131141
180	gfp-control	OS	2020-08-28_OS_signal/OS_trial_2_g0_2	1	-6.56366618019729
181	gfp-control	OS	2020-08-28_OS_signal/OS_trial_3_g0_2	0	-6.51162946538278
182	gfp-control	OS	2020-08-28_OS_signal/OS_trial_4_g0_2	1	-6.47375663364119
183	gfp-control	OS	2020-08-28_OS_signal/OS_trial_5_g0_2	0	-6.52737098634753
184	gfp-control	OS	2020-08-28_OS_signal/OS_trial_6_g0_2	1	-6.50286529747626
185	gfp-control	OS	2020-08-28_OS_signal/OS_trial_7_g0_2	0	-6.5299975866526
186	gfp-control	OS	2020-08-28_OS_signal/OS_trial_8_g0_2	1	-6.51432976551331
187	gfp-control	GD	2020-08-28_GD_signal/GD_trial_2_g0_2	1	-5.9668036985089
188	gfp-control	GD	2020-08-28_GD_signal/GD_trial_9_g0_2	0	-6.02739980114683
189	gfp-control	GD	2020-08-28_GD_signal/GD_trial_10_g0_2	1	-6.01050296318289
190	gfp-control	OS	2020-08-29_OS_signal/OS_trial_3_g0_2	0	-6.53956101514507
191	gfp-control	OS	2020-08-29_OS_signal/OS_trial_4_g0_2	1	-6.56634496019052
192	gfp-control	OS	2020-08-29_OS_signal/OS_trial_5_g0_2	0	-6.51805190697189
193	gfp-control	OS	2020-08-29_OS_signal/OS_trial_8_g0_2	1	-6.49688870121355
194	gfp-control	OS	2020-08-29_OS_signal/OS_trial_9_g0_2	0	-6.56008734847086
195	gfp-control	OS	2020-08-29_OS_signal/OS_trial_10_g0_2	1	-6.53013645290093
196	gfp-control	GD	2020-08-29_GD_signal/GD_trial_1_g0_2	0	-5.99139096416661
197	gfp-control	GD	2020-08-29_GD_signal/GD_trial_2_g0_2	1	-5.96770012043021
198	gfp-control	GD	2020-08-29_GD_signal/GD_trial_6_g0_2	1	-5.98716601483534
199	gfp-control	GD	2020-08-29_GD_signal/GD_trial_8_g0_2	1	-5.97195551898051
200	gfp-control	GD	2020-08-29_GD_signal/GD_trial_9_g0_2	0	-5.97984805689742
201	gfp-control	GD	2020-08-29_GD_signal/GD_trial_10_g0_2	1	-5.96747592430387
