# Supplementary material for: Make Friends With The Googlebot
Source: eLife journal article supplement (doi:10.7554/elife.65998), 2005-03-14
Supplement: supp [file elife-65998-supp-v1.zip › elife_poa_e65998_Figure_4_figure_supplement_2_source_data_1.csv]

	animal	exp	trial_id	laserOn	peak_t	peak_freq	ripple_dur
1	PT	main-effect	2019-11-06_PT_signal/PT_trial_4_g0_2	1	0.429600000000001	137	0.0496
2	PT	main-effect	2019-11-06_PT_signal/PT_trial_4_g0_2	1	1.7952	205	0.0271999999999999
3	PT	main-effect	2019-11-06_PT_signal/PT_trial_4_g0_2	1	13.7296	195	0.032
4	PT	main-effect	2019-11-06_PT_signal/PT_trial_5_g0_2	0	19.4664	110	0.0207999999999977
5	PT	main-effect	2019-11-06_PT_signal/PT_trial_5_g0_2	0	21.2832	83	0.0215999999999994
6	OS	main-effect	2019-11-06_OS_signal/OS_trial_6_g0_2	1	21.5968	136	0.0272000000000006
7	OS	main-effect	2019-11-06_OS_signal/OS_trial_10_g0_2	1	30.7632	136	0.0328000000000017
8	PT	main-effect	2019-11-07_PT_signal/PT_trial_3_g0_2	0	32.2816	103	0.0288000000000039
9	PT	main-effect	2019-11-07_PT_signal/PT_trial_3_g0_2	0	33.6648	169	0.0447999999999951
10	PT	main-effect	2019-11-07_PT_signal/PT_trial_4_g0_2	1	2.3264	180	0.024
11	PT	main-effect	2019-11-07_PT_signal/PT_trial_4_g0_2	1	9.9848	109	0.0216000000000012
12	PT	main-effect	2019-11-07_PT_signal/PT_trial_4_g0_2	1	19.8408	152	0.0280000000000022
13	PT	main-effect	2019-11-07_PT_signal/PT_trial_4_g0_2	1	23.0624	171	0.0399999999999991
14	PT	main-effect	2019-11-07_PT_signal/PT_trial_4_g0_2	1	34.6936	115	0.0208000000000013
15	PT	main-effect	2019-11-07_PT_signal/PT_trial_4_g0_2	1	34.808	155	0.0456000000000003
16	PT	main-effect	2019-11-07_PT_signal/PT_trial_4_g0_2	1	41.988	141	0.0215999999999994
17	PT	main-effect	2019-11-07_PT_signal/PT_trial_5_g0_2	0	7.4992	184	0.0343999999999998
18	PT	main-effect	2019-11-07_PT_signal/PT_trial_5_g0_2	0	21.5744	161	0.034399999999998
19	PT	main-effect	2019-11-07_PT_signal/PT_trial_5_g0_2	0	21.6624	123	0.0215999999999994
20	PT	main-effect	2019-11-07_PT_signal/PT_trial_5_g0_2	0	28.9864	150	0.0719999999999992
21	PT	main-effect	2019-11-07_PT_signal/PT_trial_5_g0_2	0	31.6336	130	0.0232000000000028
22	PT	main-effect	2019-11-07_PT_signal/PT_trial_5_g0_2	0	39.8632	106	0.0279999999999987
23	PT	main-effect	2019-11-07_PT_signal/PT_trial_9_g0_2	0	10.3288	113	0.0271999999999988
24	PT	main-effect	2019-11-07_PT_signal/PT_trial_9_g0_2	0	11.2856	174	0.0223999999999993
25	PT	main-effect	2019-11-07_PT_signal/PT_trial_9_g0_2	0	11.956	183	0.0280000000000005
26	PT	main-effect	2019-11-07_PT_signal/PT_trial_9_g0_2	0	23.792	160	0.0424000000000007
27	PT	main-effect	2019-11-07_PT_signal/PT_trial_9_g0_2	0	26.6024	170	0.0344000000000015
28	PT	main-effect	2019-11-07_PT_signal/PT_trial_9_g0_2	0	38.1624	149	0.0559999999999974
29	PT	main-effect	2019-11-08_PT_signal/PT_trial_6_g0_2	0	2.7736	110	0.0215999999999998
30	PT	main-effect	2019-11-08_PT_signal/PT_trial_6_g0_2	0	4.8848	129	0.0255999999999998
31	PT	main-effect	2019-11-08_PT_signal/PT_trial_6_g0_2	0	7.748	155	0.0407999999999999
32	PT	main-effect	2019-11-08_PT_signal/PT_trial_6_g0_2	0	8.9776	141	0.0231999999999992
33	PT	main-effect	2019-11-08_PT_signal/PT_trial_6_g0_2	0	17.0792	150	0.0359999999999978
34	PT	main-effect	2019-11-08_PT_signal/PT_trial_6_g0_2	0	19.3736	167	0.0424000000000007
35	PT	main-effect	2019-11-08_PT_signal/PT_trial_9_g0_2	0	9.2368	155	0.0551999999999992
36	PT	main-effect	2019-11-08_PT_signal/PT_trial_9_g0_2	0	11.84	88	0.0216000000000012
37	PT	main-effect	2019-11-08_PT_signal/PT_trial_9_g0_2	0	12.4632	166	0.0424000000000007
38	PT	main-effect	2019-11-08_PT_signal/PT_trial_9_g0_2	0	12.62	188	0.0327999999999999
39	PT	main-effect	2019-11-08_PT_signal/PT_trial_9_g0_2	0	16.564	197	0.0296000000000021
40	PT	main-effect	2019-11-08_PT_signal/PT_trial_9_g0_2	0	20.8368	177	0.0232000000000028
41	PT	main-effect	2019-11-08_PT_signal/PT_trial_9_g0_2	0	31.052	184	0.041599999999999
42	PT	main-effect	2019-11-08_PT_signal/PT_trial_9_g0_2	0	33.4544	159	0.0360000000000014
43	PT	main-effect	2019-11-08_PT_signal/PT_trial_9_g0_2	0	46.16	167	0.0488
44	BS	main-effect	2019-11-08_BS_signal/BS_trial_9_g0_2	0	29.0496	124	0.0207999999999977
45	BS	main-effect	2019-11-08_BS_signal/BS_trial_9_g0_2	0	33.8744	172	0.0272000000000006
46	BS	main-effect	2019-11-08_BS_signal/BS_trial_9_g0_2	0	33.9624	145	0.0360000000000014
47	BS	main-effect	2019-11-08_BS_signal/BS_trial_10_g0_2	0	6.244	117	0.0232000000000001
48	BS	main-effect	2019-11-08_BS_signal/BS_trial_10_g0_2	0	48.3368	106	0.0272000000000006
49	BS	main-effect	2019-11-08_BS_signal/BS_trial_10_g0_2	0	54.7576	153	0.0328000000000017
50	OS	main-effect	2019-11-11_OS_signal/OS_trial_4_g0_2	1	8.0736	146	0.0303999999999984
51	OS	main-effect	2019-11-11_OS_signal/OS_trial_6_g0_2	1	2.1752	155	0.0352000000000001
52	OS	main-effect	2019-11-11_OS_signal/OS_trial_6_g0_2	1	23.0992	127	0.0224000000000011
53	BS	main-effect	2019-11-11_BS_signal/BS_trial_2_g0_2	1	19.5744	156	0.0360000000000014
54	BS	main-effect	2019-11-11_BS_signal/BS_trial_2_g0_2	1	32.6744	156	0.0319999999999965
55	BS	main-effect	2019-11-11_BS_signal/BS_trial_2_g0_2	1	34.872	132	0.0399999999999991
56	BS	main-effect	2019-11-11_BS_signal/BS_trial_2_g0_2	1	35.408	156	0.0624000000000038
57	BS	main-effect	2019-11-11_BS_signal/BS_trial_7_g0_2	0	12.4056	102	0.0207999999999995
58	BS	main-effect	2019-11-11_BS_signal/BS_trial_8_g0_2	1	35.6296	152	0.0432000000000059
59	BS	main-effect	2019-11-11_BS_signal/BS_trial_8_g0_2	1	35.7488	158	0.0287999999999968
60	BS	main-effect	2019-11-11_BS_signal/BS_trial_8_g0_2	1	44.916	142	0.0527999999999977
61	BS	main-effect	2019-11-11_BS_signal/BS_trial_9_g0_2	0	2.508	184	0.0335999999999999
62	BS	main-effect	2019-11-11_BS_signal/BS_trial_9_g0_2	0	7.7784	161	0.0584000000000007
63	BS	main-effect	2019-11-11_BS_signal/BS_trial_9_g0_2	0	50.188	95	0.0215999999999994
64	BS	main-effect	2019-11-11_BS_signal/BS_trial_9_g0_2	0	50.7312	111	0.0231999999999957
65	BS	main-effect	2019-11-11_BS_signal/BS_trial_9_g0_2	0	51.8992	100	0.0296000000000021
66	BS	main-effect	2019-11-11_BS_signal/BS_trial_9_g0_2	0	52.2832	145	0.0431999999999988
67	BS	main-effect	2019-11-11_BS_signal/BS_trial_9_g0_2	0	52.396	147	0.039200000000001
68	BS	main-effect	2019-11-11_BS_signal/BS_trial_10_g0_2	1	41.0584	127	0.039200000000001
69	BS	main-effect	2019-11-11_BS_signal/BS_trial_10_g0_2	1	54.2184	145	0.0399999999999991
70	PT	main-effect	2019-11-12_PT_signal/PT_trial_2_g0_2	1	20.2856	218	0.0231999999999992
71	PT	main-effect	2019-11-12_PT_signal/PT_trial_2_g0_2	1	38.7504	92	0.0208000000000013
72	PT	main-effect	2019-11-12_PT_signal/PT_trial_2_g0_2	1	40.232	208	0.0304000000000002
73	PT	main-effect	2019-11-12_PT_signal/PT_trial_2_g0_2	1	41.7864	116	0.0304000000000002
74	PT	main-effect	2019-11-12_PT_signal/PT_trial_3_g0_2	0	8.7968	161	0.0519999999999996
75	PT	main-effect	2019-11-12_PT_signal/PT_trial_3_g0_2	0	17.4256	197	0.024799999999999
76	PT	main-effect	2019-11-12_PT_signal/PT_trial_3_g0_2	0	19.5696	194	0.0423999999999971
77	PT	main-effect	2019-11-12_PT_signal/PT_trial_3_g0_2	0	22.0344	157	0.0351999999999997
78	PT	main-effect	2019-11-12_PT_signal/PT_trial_3_g0_2	0	27.6112	149	0.0375999999999976
79	PT	main-effect	2019-11-12_PT_signal/PT_trial_3_g0_2	0	29.4224	164	0.0344000000000015
80	PT	main-effect	2019-11-12_PT_signal/PT_trial_5_g0_2	0	12.056	162	0.0207999999999995
81	PT	main-effect	2019-11-12_PT_signal/PT_trial_5_g0_2	0	14.0976	119	0.0215999999999994
82	PT	main-effect	2019-11-12_PT_signal/PT_trial_5_g0_2	0	16.0872	162	0.0632000000000019
83	PT	main-effect	2019-11-12_PT_signal/PT_trial_5_g0_2	0	16.5944	168	0.0551999999999992
84	PT	main-effect	2019-11-12_PT_signal/PT_trial_5_g0_2	0	16.7976	162	0.0279999999999987
85	PT	main-effect	2019-11-12_PT_signal/PT_trial_5_g0_2	0	27.8288	159	0.039200000000001
86	PT	main-effect	2019-11-12_PT_signal/PT_trial_7_g0_2	0	5.4208	154	0.0256000000000007
87	PT	main-effect	2019-11-12_PT_signal/PT_trial_7_g0_2	0	7.2808	150	0.0280000000000005
88	PT	main-effect	2019-11-12_PT_signal/PT_trial_7_g0_2	0	10.224	154	0.0728000000000009
89	PT	main-effect	2019-11-12_PT_signal/PT_trial_7_g0_2	0	13.9792	145	0.055200000000001
90	PT	main-effect	2019-11-12_PT_signal/PT_trial_7_g0_2	0	17.4488	134	0.0296000000000021
91	PT	main-effect	2019-11-12_PT_signal/PT_trial_9_g0_2	0	2.9528	141	0.0295999999999998
92	PT	main-effect	2019-11-12_PT_signal/PT_trial_9_g0_2	0	3.552	91	0.0264000000000002
93	PT	main-effect	2019-11-12_PT_signal/PT_trial_9_g0_2	0	4.8296	149	0.0344000000000007
94	PT	main-effect	2019-11-12_PT_signal/PT_trial_9_g0_2	0	12.304	221	0.0248000000000008
95	PT	main-effect	2019-11-12_PT_signal/PT_trial_9_g0_2	0	14.3416	97	0.0256000000000007
96	PT	main-effect	2019-11-12_PT_signal/PT_trial_9_g0_2	0	20.5736	173	0.0440000000000005
97	PT	main-effect	2019-11-12_PT_signal/PT_trial_9_g0_2	0	20.6256	96	0.0224000000000011
98	PT	main-effect	2019-11-12_PT_signal/PT_trial_9_g0_2	0	20.7128	155	0.0440000000000005
99	PT	main-effect	2019-11-12_PT_signal/PT_trial_9_g0_2	0	25.0072	119	0.0215999999999994
100	PT	main-effect	2019-11-12_PT_signal/PT_trial_9_g0_2	0	26.0088	140	0.0344000000000015
101	PT	main-effect	2019-11-12_PT_signal/PT_trial_9_g0_2	0	27.7584	160	0.0519999999999996
102	PT	main-effect	2019-11-12_PT_signal/PT_trial_10_g0_2	1	15.1264	130	0.025599999999999
103	PT	main-effect	2019-11-12_PT_signal/PT_trial_10_g0_2	1	19.6672	143	0.0328000000000017
104	PT	main-effect	2019-11-12_PT_signal/PT_trial_10_g0_2	1	27.3576	162	0.0519999999999996
105	PT	main-effect	2019-11-12_PT_signal/PT_trial_10_g0_2	1	32.3576	137	0.0335999999999999
106	PT	main-effect	2019-11-12_PT_signal/PT_trial_10_g0_2	1	32.8808	160	0.0304000000000002
107	OS	main-effect	2019-11-12_OS_signal/OS_trial_1_g0_2	0	12.1856	125	0.0215999999999994
108	OS	main-effect	2019-11-12_OS_signal/OS_trial_2_g0_2	1	20.696	161	0.0544000000000011
109	OS	main-effect	2019-11-12_OS_signal/OS_trial_3_g0_2	0	10.4008	100	0.0327999999999999
110	OS	main-effect	2019-11-12_OS_signal/OS_trial_3_g0_2	0	19.9576	143	0.0231999999999992
111	OS	main-effect	2019-11-12_OS_signal/OS_trial_3_g0_2	0	20.7344	179	0.0231999999999992
112	OS	main-effect	2019-11-12_OS_signal/OS_trial_3_g0_2	0	21.92	167	0.0456000000000003
113	OS	main-effect	2019-11-12_OS_signal/OS_trial_4_g0_2	1	41.0464	136	0.0360000000000014
114	OS	main-effect	2019-11-12_OS_signal/OS_trial_5_g0_2	0	11.5064	142	0.0343999999999998
115	OS	main-effect	2019-11-12_OS_signal/OS_trial_6_g0_2	1	26.4656	119	0.0280000000000022
116	OS	main-effect	2019-11-12_OS_signal/OS_trial_7_g0_2	0	8.4864	161	0.025599999999999
117	OS	main-effect	2019-11-12_OS_signal/OS_trial_7_g0_2	0	10.1344	103	0.0224000000000011
118	OS	main-effect	2019-11-12_OS_signal/OS_trial_7_g0_2	0	12.6672	208	0.0264000000000006
119	OS	main-effect	2019-11-12_OS_signal/OS_trial_7_g0_2	0	14.1824	157	0.0440000000000005
120	OS	main-effect	2019-11-12_OS_signal/OS_trial_8_g0_2	1	33.4424	188	0.0399999999999991
121	OS	main-effect	2019-11-12_OS_signal/OS_trial_9_g0_2	0	2.308	167	0.0296000000000003
122	OS	main-effect	2019-11-12_OS_signal/OS_trial_9_g0_2	0	8.1552	155	0.0632000000000001
123	OS	main-effect	2019-11-12_OS_signal/OS_trial_9_g0_2	0	19.648	141	0.0279999999999987
124	OS	main-effect	2019-11-12_OS_signal/OS_trial_10_g0_2	1	4.7408	129	0.0215999999999994
125	OS	main-effect	2019-11-12_OS_signal/OS_trial_10_g0_2	1	10.5056	169	0.0384000000000011
126	OS	main-effect	2019-11-12_OS_signal/OS_trial_10_g0_2	1	24.564	97	0.0256000000000007
127	BS	main-effect	2019-11-12_BS_signal/BS_trial_2_g0_2	1	27.8656	143	0.0215999999999994
128	BS	main-effect	2019-11-12_BS_signal/BS_trial_2_g0_2	1	30.816	80	0.0208000000000013
129	BS	main-effect	2019-11-12_BS_signal/BS_trial_2_g0_2	1	52.0312	116	0.0208000000000013
130	BS	main-effect	2019-11-12_BS_signal/BS_trial_2_g0_2	1	54.6352	124	0.0239999999999938
131	BS	main-effect	2019-11-12_BS_signal/BS_trial_2_g0_2	1	55.6976	89	0.0263999999999953
132	BS	main-effect	2019-11-12_BS_signal/BS_trial_2_g0_2	1	57.4456	193	0.0304000000000002
133	BS	main-effect	2019-11-12_BS_signal/BS_trial_3_g0_2	0	41.8408	193	0.0304000000000002
134	BS	main-effect	2019-11-12_BS_signal/BS_trial_3_g0_2	0	44.0944	169	0.0439999999999969
135	BS	main-effect	2019-11-12_BS_signal/BS_trial_3_g0_2	0	47.7312	89	0.0224000000000046
136	BS	main-effect	2019-11-12_BS_signal/BS_trial_3_g0_2	0	50.3472	97	0.0232000000000028
137	BS	main-effect	2019-11-12_BS_signal/BS_trial_5_g0_2	0	0.0688000000000004	223	0.0224000000000002
138	BS	main-effect	2019-11-12_BS_signal/BS_trial_5_g0_2	0	2.4424	95	0.024
139	BS	main-effect	2019-11-12_BS_signal/BS_trial_5_g0_2	0	3.3392	211	0.0255999999999998
140	BS	main-effect	2019-11-12_BS_signal/BS_trial_5_g0_2	0	19.9184	97	0.027199999999997
141	BS	main-effect	2019-11-12_BS_signal/BS_trial_5_g0_2	0	26.0136	88	0.0231999999999992
142	BS	main-effect	2019-11-12_BS_signal/BS_trial_5_g0_2	0	27.9632	122	0.0240000000000009
143	BS	main-effect	2019-11-12_BS_signal/BS_trial_5_g0_2	0	42.5264	128	0.0224000000000046
144	BS	main-effect	2019-11-12_BS_signal/BS_trial_5_g0_2	0	45.0608	126	0.0279999999999987
145	BS	main-effect	2019-11-12_BS_signal/BS_trial_5_g0_2	0	47.0768	144	0.0448000000000022
146	BS	main-effect	2019-11-12_BS_signal/BS_trial_5_g0_2	0	56.2552	97	0.0279999999999987
147	BS	main-effect	2019-11-12_BS_signal/BS_trial_7_g0_2	0	28.3016	97	0.0264000000000024
148	BS	main-effect	2019-11-12_BS_signal/BS_trial_7_g0_2	0	41.296	104	0.0255999999999972
149	BS	main-effect	2019-11-12_BS_signal/BS_trial_7_g0_2	0	41.4056	147	0.0703999999999994
150	BS	main-effect	2019-11-12_BS_signal/BS_trial_7_g0_2	0	41.6544	139	0.0728000000000009
151	BS	main-effect	2019-11-12_BS_signal/BS_trial_7_g0_2	0	42.196	129	0.0480000000000018
152	BS	main-effect	2019-11-12_BS_signal/BS_trial_10_g0_2	1	23.704	129	0.0359999999999978
153	BS	main-effect	2019-11-12_BS_signal/BS_trial_10_g0_2	1	30.7664	90	0.0288000000000004
154	PT	main-effect	2019-11-13_PT_signal/PT_trial_1_g0_2	0	6.7336	209	0.0208000000000004
155	PT	main-effect	2019-11-13_PT_signal/PT_trial_1_g0_2	0	9.1296	142	0.0312000000000001
156	PT	main-effect	2019-11-13_PT_signal/PT_trial_1_g0_2	0	12.6176	133	0.0296000000000003
157	PT	main-effect	2019-11-13_PT_signal/PT_trial_1_g0_2	0	14.748	158	0.0400000000000009
158	PT	main-effect	2019-11-13_PT_signal/PT_trial_1_g0_2	0	20.8128	180	0.0431999999999988
159	PT	main-effect	2019-11-13_PT_signal/PT_trial_2_g0_2	1	14.8904	111	0.0224000000000011
160	PT	main-effect	2019-11-13_PT_signal/PT_trial_2_g0_2	1	14.9496	170	0.041599999999999
161	PT	main-effect	2019-11-13_PT_signal/PT_trial_3_g0_2	0	3.2256	145	0.0223999999999998
162	PT	main-effect	2019-11-13_PT_signal/PT_trial_3_g0_2	0	7.9776	120	0.024
163	PT	main-effect	2019-11-13_PT_signal/PT_trial_3_g0_2	0	9.5808	217	0.023200000000001
164	PT	main-effect	2019-11-13_PT_signal/PT_trial_3_g0_2	0	10.128	162	0.0768000000000004
165	PT	main-effect	2019-11-13_PT_signal/PT_trial_3_g0_2	0	11.4536	160	0.0215999999999994
166	PT	main-effect	2019-11-13_PT_signal/PT_trial_3_g0_2	0	16.9904	132	0.0240000000000009
167	PT	main-effect	2019-11-13_PT_signal/PT_trial_3_g0_2	0	17.8912	202	0.0263999999999989
168	PT	main-effect	2019-11-13_PT_signal/PT_trial_3_g0_2	0	23.8744	170	0.0391999999999975
169	PT	main-effect	2019-11-13_PT_signal/PT_trial_3_g0_2	0	36.9232	191	0.0367999999999995
170	PT	main-effect	2019-11-13_PT_signal/PT_trial_3_g0_2	0	37.5312	233	0.0215999999999994
171	PT	main-effect	2019-11-13_PT_signal/PT_trial_4_g0_2	1	12.8048	158	0.0352000000000015
172	PT	main-effect	2019-11-13_PT_signal/PT_trial_5_g0_2	0	18.1152	82	0.0279999999999987
173	PT	main-effect	2019-11-13_PT_signal/PT_trial_5_g0_2	0	28.92	169	0.0463999999999984
174	PT	main-effect	2019-11-13_PT_signal/PT_trial_6_g0_2	1	8.8984	194	0.0239999999999991
175	PT	main-effect	2019-11-13_PT_signal/PT_trial_6_g0_2	1	10.1344	112	0.0240000000000009
176	PT	main-effect	2019-11-13_PT_signal/PT_trial_6_g0_2	1	12.3352	181	0.0343999999999998
177	PT	main-effect	2019-11-13_PT_signal/PT_trial_6_g0_2	1	15.62	157	0.0952000000000002
178	PT	main-effect	2019-11-13_PT_signal/PT_trial_7_g0_2	0	7.4456	87	0.0295999999999994
179	PT	main-effect	2019-11-13_PT_signal/PT_trial_7_g0_2	0	7.9896	116	0.0311999999999992
180	PT	main-effect	2019-11-13_PT_signal/PT_trial_7_g0_2	0	14.168	174	0.039200000000001
181	PT	main-effect	2019-11-13_PT_signal/PT_trial_7_g0_2	0	16.5416	174	0.0303999999999967
182	PT	main-effect	2019-11-13_PT_signal/PT_trial_7_g0_2	0	16.6928	164	0.0439999999999969
183	PT	main-effect	2019-11-13_PT_signal/PT_trial_7_g0_2	0	18.1152	170	0.0424000000000007
184	PT	main-effect	2019-11-13_PT_signal/PT_trial_8_g0_2	1	0.7456	142	0.021599999999999
185	PT	main-effect	2019-11-13_PT_signal/PT_trial_8_g0_2	1	3.484	109	0.0207999999999999
186	PT	main-effect	2019-11-13_PT_signal/PT_trial_8_g0_2	1	19.4608	139	0.0288000000000004
187	PT	main-effect	2019-11-13_PT_signal/PT_trial_9_g0_2	0	6.1112	187	0.0232000000000001
188	PT	main-effect	2019-11-13_PT_signal/PT_trial_9_g0_2	0	8.376	157	0.0400000000000009
189	PT	main-effect	2019-11-13_PT_signal/PT_trial_9_g0_2	0	10.9368	125	0.0240000000000009
190	PT	main-effect	2019-11-13_PT_signal/PT_trial_9_g0_2	0	11.9296	163	0.048
191	PT	main-effect	2019-11-13_PT_signal/PT_trial_9_g0_2	0	15.088	179	0.0431999999999988
192	PT	main-effect	2019-11-13_PT_signal/PT_trial_10_g0_2	1	4.5544	122	0.0247999999999999
193	PT	main-effect	2019-11-13_PT_signal/PT_trial_10_g0_2	1	22.4792	140	0.0240000000000009
194	OS	main-effect	2019-11-13_OS_signal/OS_trial_2_g0_2	1	6.2248	136	0.0247999999999999
195	OS	main-effect	2019-11-13_OS_signal/OS_trial_3_g0_2	0	8.7104	133	0.0368000000000013
196	OS	main-effect	2019-11-13_OS_signal/OS_trial_3_g0_2	0	10.9864	137	0.0223999999999993
197	OS	main-effect	2019-11-13_OS_signal/OS_trial_3_g0_2	0	13.9776	162	0.0272000000000006
198	OS	main-effect	2019-11-13_OS_signal/OS_trial_3_g0_2	0	15.8096	112	0.0327999999999999
199	OS	main-effect	2019-11-13_OS_signal/OS_trial_3_g0_2	0	16.5944	135	0.024799999999999
200	OS	main-effect	2019-11-13_OS_signal/OS_trial_4_g0_2	1	29.232	108	0.0272000000000006
201	OS	main-effect	2019-11-13_OS_signal/OS_trial_5_g0_2	0	8.8336	206	0.0335999999999999
202	OS	main-effect	2019-11-13_OS_signal/OS_trial_5_g0_2	0	15.8	113	0.0296000000000003
203	OS	main-effect	2019-11-13_OS_signal/OS_trial_5_g0_2	0	21.5584	108	0.0263999999999989
204	OS	main-effect	2019-11-13_OS_signal/OS_trial_5_g0_2	0	26.2072	135	0.0215999999999994
205	OS	main-effect	2019-11-13_OS_signal/OS_trial_7_g0_2	0	17.916	109	0.0256000000000007
206	OS	main-effect	2019-11-13_OS_signal/OS_trial_8_g0_2	1	4.5288	126	0.024
207	BS	main-effect	2019-11-13_BS_signal/BS_trial_1_g0_2	0	0.236800000000001	131	0.032
208	BS	main-effect	2019-11-13_BS_signal/BS_trial_1_g0_2	0	1.264	165	0.0464
209	BS	main-effect	2019-11-13_BS_signal/BS_trial_1_g0_2	0	40.1456	95	0.0223999999999975
210	BS	main-effect	2019-11-13_BS_signal/BS_trial_2_g0_2	1	39.1352	81	0.0256000000000043
211	BS	main-effect	2019-11-13_BS_signal/BS_trial_3_g0_2	0	30.8792	175	0.0424000000000007
212	BS	main-effect	2019-11-13_BS_signal/BS_trial_3_g0_2	0	32.6944	143	0.0367999999999995
213	BS	main-effect	2019-11-13_BS_signal/BS_trial_3_g0_2	0	33.2784	168	0.0431999999999988
214	BS	main-effect	2019-11-13_BS_signal/BS_trial_3_g0_2	0	34.9936	133	0.024799999999999
215	BS	main-effect	2019-11-13_BS_signal/BS_trial_3_g0_2	0	35.0856	142	0.0599999999999952
216	BS	main-effect	2019-11-13_BS_signal/BS_trial_5_g0_2	0	36.3232	152	0.0399999999999991
217	BS	main-effect	2019-11-13_BS_signal/BS_trial_6_g0_2	1	38.9152	133	0.0495999999999981
218	BS	main-effect	2019-11-13_BS_signal/BS_trial_6_g0_2	1	39.0296	90	0.0232000000000028
219	BS	main-effect	2019-11-13_BS_signal/BS_trial_6_g0_2	1	39.164	157	0.0424000000000007
220	BS	main-effect	2019-11-13_BS_signal/BS_trial_7_g0_2	0	41.3504	170	0.0456000000000003
221	BS	main-effect	2019-11-13_BS_signal/BS_trial_7_g0_2	0	41.684	143	0.0559999999999974
222	BS	main-effect	2019-11-13_BS_signal/BS_trial_8_g0_2	1	4.5592	139	0.0375999999999994
223	BS	main-effect	2019-11-13_BS_signal/BS_trial_8_g0_2	1	33.0032	124	0.0344000000000051
224	BS	main-effect	2019-11-13_BS_signal/BS_trial_8_g0_2	1	34.5024	127	0.029599999999995
225	BS	main-effect	2019-11-13_BS_signal/BS_trial_8_g0_2	1	34.5704	148	0.039200000000001
226	BS	main-effect	2019-11-13_BS_signal/BS_trial_10_g0_2	1	0.0911999999999997	143	0.0536000000000004
227	BS	main-effect	2019-11-13_BS_signal/BS_trial_10_g0_2	1	4.6832	101	0.0280000000000005
228	BS	main-effect	2019-11-13_BS_signal/BS_trial_10_g0_2	1	39.4744	99	0.0200000000000031
229	BS	main-effect	2019-11-13_BS_signal/BS_trial_10_g0_2	1	42.0104	80	0.0263999999999953
230	BR	main-effect	2020-08-24_BR_signal/BR_trial_2_g0_2	1	3.8584	171	0.0407999999999999
231	BR	main-effect	2020-08-24_BR_signal/BR_trial_2_g0_2	1	9.7088	151	0.024799999999999
232	BR	main-effect	2020-08-24_BR_signal/BR_trial_3_g0_2	0	7.8656	172	0.0216000000000003
233	BR	main-effect	2020-08-24_BR_signal/BR_trial_3_g0_2	0	10.8736	133	0.0296000000000003
234	BR	main-effect	2020-08-24_BR_signal/BR_trial_3_g0_2	0	12.1072	136	0.0256000000000007
235	BR	main-effect	2020-08-24_BR_signal/BR_trial_3_g0_2	0	18.9256	192	0.0344000000000015
236	BR	main-effect	2020-08-24_BR_signal/BR_trial_4_g0_2	1	6.4288	151	0.0359999999999996
237	BR	main-effect	2020-08-24_BR_signal/BR_trial_5_g0_2	0	12.3448	159	0.0568000000000008
238	BR	main-effect	2020-08-24_BR_signal/BR_trial_5_g0_2	0	12.8736	160	0.0335999999999999
239	BR	main-effect	2020-08-24_BR_signal/BR_trial_5_g0_2	0	20.0688	178	0.0199999999999996
240	BR	main-effect	2020-08-24_BR_signal/BR_trial_6_g0_2	1	6.2416	174	0.024
241	BR	main-effect	2020-08-24_BR_signal/BR_trial_6_g0_2	1	8.2384	115	0.0271999999999988
242	BR	main-effect	2020-08-24_BR_signal/BR_trial_6_g0_2	1	18.6088	161	0.0272000000000006
243	BR	main-effect	2020-08-24_BR_signal/BR_trial_7_g0_2	0	7.6816	164	0.0352000000000006
244	BR	main-effect	2020-08-24_BR_signal/BR_trial_7_g0_2	0	8.6616	169	0.0568000000000008
245	BR	main-effect	2020-08-24_BR_signal/BR_trial_8_g0_2	1	4.2432	153	0.0640000000000001
246	BR	main-effect	2020-08-24_BR_signal/BR_trial_9_g0_2	0	17.2944	160	0.0616000000000021
247	TL	main-effect	2020-08-24_TL_signal/TL_trial_7_g0_2	0	15.1856	128	0.0239999999999991
248	TL	main-effect	2020-08-24_TL_signal/TL_trial_9_g0_2	0	9.2408	129	0.0312000000000001
249	BR	main-effect	2020-08-25_BR_signal/BR_trial_4_g0_2	1	6.1784	108	0.0208000000000004
250	BR	main-effect	2020-08-25_BR_signal/BR_trial_4_g0_2	1	17.9344	177	0.0215999999999994
251	BR	main-effect	2020-08-25_BR_signal/BR_trial_4_g0_2	1	23.7056	177	0.0408000000000008
252	BR	main-effect	2020-08-25_BR_signal/BR_trial_4_g0_2	1	24.804	150	0.0376000000000012
253	BR	main-effect	2020-08-25_BR_signal/BR_trial_4_g0_2	1	25.0816	176	0.0304000000000002
254	BR	main-effect	2020-08-25_BR_signal/BR_trial_7_g0_2	0	6.7416	131	0.0263999999999998
255	BR	main-effect	2020-08-25_BR_signal/BR_trial_7_g0_2	0	12.1776	102	0.023200000000001
256	BR	main-effect	2020-08-25_BR_signal/BR_trial_7_g0_2	0	19.84	208	0.0231999999999992
257	BR	main-effect	2020-08-25_BR_signal/BR_trial_7_g0_2	0	24.536	151	0.0592000000000006
258	BR	main-effect	2020-08-25_BR_signal/BR_trial_7_g0_2	0	28.1392	131	0.021600000000003
259	BR	main-effect	2020-08-25_BR_signal/BR_trial_8_g0_2	1	21.7752	200	0.0288000000000004
260	BR	main-effect	2020-08-25_BR_signal/BR_trial_8_g0_2	1	23.2576	127	0.0440000000000005
261	BR	main-effect	2020-08-25_BR_signal/BR_trial_8_g0_2	1	25.4072	149	0.0703999999999994
262	BR	main-effect	2020-08-25_BR_signal/BR_trial_8_g0_2	1	27.9344	204	0.0272000000000006
263	BR	main-effect	2020-08-25_BR_signal/BR_trial_9_g0_2	0	9.0184	162	0.0279999999999987
264	BR	main-effect	2020-08-25_BR_signal/BR_trial_9_g0_2	0	10.9768	151	0.0503999999999998
265	BR	main-effect	2020-08-25_BR_signal/BR_trial_9_g0_2	0	20.4824	167	0.0488
266	BR	main-effect	2020-08-25_BR_signal/BR_trial_10_g0_2	1	1.208	125	0.0327999999999999
267	BR	main-effect	2020-08-25_BR_signal/BR_trial_10_g0_2	1	23.2312	185	0.0335999999999999
268	BR	main-effect	2020-08-25_BR_signal/BR_trial_10_g0_2	1	25.3944	139	0.0328000000000017
269	BR	main-effect	2020-08-25_BR_signal/BR_trial_10_g0_2	1	45.1016	175	0.044000000000004
270	TL	main-effect	2020-08-25_TL_signal/TL_trial_6_g0_2	0	21.352	178	0.024799999999999
271	TL	main-effect	2020-08-25_TL_signal/TL_trial_6_g0_2	0	36.7856	157	0.034399999999998
272	TL	main-effect	2020-08-25_TL_signal/TL_trial_6_g0_2	0	42.6648	168	0.0223999999999975
273	TL	main-effect	2020-08-25_TL_signal/TL_trial_6_g0_2	0	49.1408	144	0.0263999999999953
274	TL	main-effect	2020-08-25_TL_signal/TL_trial_9_g0_2	0	27.5496	244	0.0199999999999996
275	BD	main-effect	2020-08-26_BD_signal/BD_trial_1_g0_2	0	17.5376	180	0.0351999999999997
276	BD	main-effect	2020-08-26_BD_signal/BD_trial_4_g0_2	1	7.2024	112	0.0207999999999995
277	BD	main-effect	2020-08-26_BD_signal/BD_trial_5_g0_2	0	4.2216	124	0.0423999999999998
278	TL	main-effect	2020-08-26_TL_signal/TL_trial_1_g0_2	0	5.0224	194	0.0304000000000002
279	TL	main-effect	2020-08-26_TL_signal/TL_trial_2_g0_2	1	10.9128	127	0.0208000000000013
280	BR	main-effect	2020-08-27_BR_signal/BR_trial_1_g0_2	0	4.864	162	0.0280000000000005
281	BR	main-effect	2020-08-27_BR_signal/BR_trial_1_g0_2	0	21.208	167	0.0408000000000008
282	BR	main-effect	2020-08-27_BR_signal/BR_trial_2_g0_2	1	23.6824	98	0.0231999999999992
283	BR	main-effect	2020-08-27_BR_signal/BR_trial_2_g0_2	1	26.0808	193	0.032
284	BR	main-effect	2020-08-27_BR_signal/BR_trial_3_g0_2	0	24.7232	131	0.024799999999999
285	BR	main-effect	2020-08-27_BR_signal/BR_trial_3_g0_2	0	38.8848	96	0.0215999999999994
286	BR	main-effect	2020-08-27_BR_signal/BR_trial_3_g0_2	0	38.9312	180	0.0279999999999987
287	BR	main-effect	2020-08-27_BR_signal/BR_trial_3_g0_2	0	39.2952	141	0.0215999999999994
288	BR	main-effect	2020-08-27_BR_signal/BR_trial_4_g0_2	1	7.7048	138	0.0231999999999992
289	BR	main-effect	2020-08-27_BR_signal/BR_trial_5_g0_2	0	5.5248	137	0.0312000000000001
290	BR	main-effect	2020-08-27_BR_signal/BR_trial_5_g0_2	0	8.096	208	0.0287999999999986
291	BR	main-effect	2020-08-27_BR_signal/BR_trial_5_g0_2	0	9.0624	159	0.0568000000000008
292	BR	main-effect	2020-08-27_BR_signal/BR_trial_6_g0_2	1	29.8736	156	0.0711999999999975
293	BR	main-effect	2020-08-27_BR_signal/BR_trial_7_g0_2	0	8.708	153	0.0351999999999997
294	BR	main-effect	2020-08-27_BR_signal/BR_trial_7_g0_2	0	30.3616	165	0.0279999999999987
295	BR	main-effect	2020-08-27_BR_signal/BR_trial_7_g0_2	0	34.1488	105	0.0272000000000006
296	BR	main-effect	2020-08-27_BR_signal/BR_trial_8_g0_2	1	7.4224	218	0.0231999999999992
297	BR	main-effect	2020-08-27_BR_signal/BR_trial_8_g0_2	1	12.3272	159	0.0207999999999995
298	BR	main-effect	2020-08-27_BR_signal/BR_trial_8_g0_2	1	18.556	101	0.027199999999997
299	BR	main-effect	2020-08-27_BR_signal/BR_trial_8_g0_2	1	23.7296	184	0.0367999999999995
300	BR	main-effect	2020-08-27_BR_signal/BR_trial_8_g0_2	1	35.4992	216	0.0256000000000043
301	BR	main-effect	2020-08-27_BR_signal/BR_trial_9_g0_2	0	5.9584	190	0.0312000000000001
302	BR	main-effect	2020-08-27_BR_signal/BR_trial_10_g0_2	1	17.2824	128	0.024799999999999
303	BR	main-effect	2020-08-27_BR_signal/BR_trial_10_g0_2	1	21.508	159	0.0560000000000009
304	TL	main-effect	2020-08-27_TL_signal/TL_trial_1_g0_2	0	19.204	141	0.0328000000000017
305	TL	main-effect	2020-08-27_TL_signal/TL_trial_4_g0_2	1	9.8632	89	0.0223999999999993
306	TL	main-effect	2020-08-27_TL_signal/TL_trial_5_g0_2	0	5.0608	178	0.0351999999999997
307	TL	main-effect	2020-08-27_TL_signal/TL_trial_5_g0_2	0	11.1272	168	0.0503999999999998
308	TL	main-effect	2020-08-27_TL_signal/TL_trial_5_g0_2	0	26.848	201	0.0287999999999968
309	TL	main-effect	2020-08-27_TL_signal/TL_trial_5_g0_2	0	34.5968	115	0.0223999999999975
310	TL	main-effect	2020-08-27_TL_signal/TL_trial_6_g0_2	1	1.9024	131	0.0224
311	TL	main-effect	2020-08-27_TL_signal/TL_trial_6_g0_2	1	2.012	88	0.0232000000000001
312	TL	main-effect	2020-08-27_TL_signal/TL_trial_6_g0_2	1	32.1752	209	0.0272000000000006
313	TL	main-effect	2020-08-27_TL_signal/TL_trial_9_g0_2	0	10.4568	168	0.0464000000000002
314	TL	main-effect	2020-08-27_TL_signal/TL_trial_9_g0_2	0	41.128	159	0.0287999999999968
315	BR	main-effect	2020-08-28_BR_signal/BR_trial_1_g0_2	0	6.9976	179	0.0392000000000001
316	BR	main-effect	2020-08-28_BR_signal/BR_trial_1_g0_2	0	12.7456	133	0.0279999999999987
317	BR	main-effect	2020-08-28_BR_signal/BR_trial_1_g0_2	0	12.7936	163	0.0351999999999997
318	BR	main-effect	2020-08-28_BR_signal/BR_trial_1_g0_2	0	22.0432	97	0.024799999999999
319	BR	main-effect	2020-08-28_BR_signal/BR_trial_2_g0_2	1	7.4176	90	0.0216000000000003
320	BR	main-effect	2020-08-28_BR_signal/BR_trial_2_g0_2	1	7.7928	188	0.0304000000000002
321	BR	main-effect	2020-08-28_BR_signal/BR_trial_3_g0_2	0	5.648	126	0.0216000000000003
322	BR	main-effect	2020-08-28_BR_signal/BR_trial_3_g0_2	0	9.768	150	0.0263999999999989
323	BR	main-effect	2020-08-28_BR_signal/BR_trial_3_g0_2	0	24.944	86	0.0208000000000013
324	BR	main-effect	2020-08-28_BR_signal/BR_trial_3_g0_2	0	30.2952	154	0.0223999999999975
325	BR	main-effect	2020-08-28_BR_signal/BR_trial_3_g0_2	0	32.7952	151	0.039200000000001
326	BR	main-effect	2020-08-28_BR_signal/BR_trial_4_g0_2	1	30.3992	168	0.0456000000000003
327	TL	main-effect	2020-08-28_TL_signal/TL_trial_2_g0_2	1	31.9936	138	0.0231999999999957
328	TL	main-effect	2020-08-28_TL_signal/TL_trial_3_g0_2	0	34.0376	230	0.0208000000000013
329	TL	main-effect	2020-08-28_TL_signal/TL_trial_7_g0_2	0	8.82	111	0.0208000000000101
330	TL	main-effect	2020-08-28_TL_signal/TL_trial_7_g0_2	0	42.4144	121	0.0200000000000031
331	OS	gfp-control	2020-08-24_OS_signal/OS_trial_3_g0_2	0	12.6576	188	0.0288000000000004
332	OS	gfp-control	2020-08-24_OS_signal/OS_trial_3_g0_2	0	16.652	142	0.0208000000000013
333	OS	gfp-control	2020-08-24_OS_signal/OS_trial_7_g0_2	0	10.7296	156	0.0351999999999997
334	OS	gfp-control	2020-08-24_OS_signal/OS_trial_7_g0_2	0	11.7144	187	0.0296000000000003
335	OS	gfp-control	2020-08-24_OS_signal/OS_trial_8_g0_2	1	24.5312	196	0.0208000000000013
336	OS	gfp-control	2020-08-24_OS_signal/OS_trial_8_g0_2	1	26.3848	196	0.0207999999999977
337	OS	gfp-control	2020-08-24_OS_signal/OS_trial_9_g0_2	0	5.608	167	0.0288000000000004
338	OS	gfp-control	2020-08-24_OS_signal/OS_trial_9_g0_2	0	10.2528	154	0.0296000000000003
339	OS	gfp-control	2020-08-24_OS_signal/OS_trial_9_g0_2	0	13.3016	146	0.0551999999999992
340	OS	gfp-control	2020-08-24_OS_signal/OS_trial_9_g0_2	0	25.2216	163	0.0383999999999993
341	OS	gfp-control	2020-08-24_OS_signal/OS_trial_10_g0_2	1	6.372	175	0.0663999999999998
342	OS	gfp-control	2020-08-24_OS_signal/OS_trial_10_g0_2	1	16.5304	171	0.0256000000000007
343	OS	gfp-control	2020-08-24_OS_signal/OS_trial_10_g0_2	1	17.0568	182	0.0376000000000012
344	OS	gfp-control	2020-08-24_OS_signal/OS_trial_10_g0_2	1	19.188	99	0.024799999999999
345	GD	gfp-control	2020-08-24_GD_signal/GD_trial_1_g0_2	0	22.8136	107	0.0264000000000024
346	GD	gfp-control	2020-08-24_GD_signal/GD_trial_1_g0_2	0	25.0728	98	0.0256000000000007
347	OS	gfp-control	2020-08-25_OS_signal/OS_trial_2_g0_2	1	21.5536	172	0.0327999999999982
348	OS	gfp-control	2020-08-25_OS_signal/OS_trial_2_g0_2	1	25.9512	149	0.0519999999999996
349	OS	gfp-control	2020-08-25_OS_signal/OS_trial_3_g0_2	0	8.3696	150	0.0560000000000009
350	OS	gfp-control	2020-08-25_OS_signal/OS_trial_3_g0_2	0	14.5056	105	0.023200000000001
351	OS	gfp-control	2020-08-25_OS_signal/OS_trial_4_g0_2	1	15.2016	109	0.0272000000000006
352	OS	gfp-control	2020-08-25_OS_signal/OS_trial_4_g0_2	1	16.2104	125	0.0272000000000006
353	OS	gfp-control	2020-08-25_OS_signal/OS_trial_5_g0_2	0	11.432	156	0.0327999999999999
354	OS	gfp-control	2020-08-25_OS_signal/OS_trial_7_g0_2	0	15.9432	149	0.0312000000000001
355	OS	gfp-control	2020-08-25_OS_signal/OS_trial_7_g0_2	0	19.8512	141	0.0232000000000028
356	OS	gfp-control	2020-08-25_OS_signal/OS_trial_7_g0_2	0	21.5552	88	0.0207999999999977
357	OS	gfp-control	2020-08-25_OS_signal/OS_trial_7_g0_2	0	29.2272	163	0.0360000000000014
358	OS	gfp-control	2020-08-25_OS_signal/OS_trial_8_g0_2	1	18.2392	188	0.032
359	OS	gfp-control	2020-08-25_OS_signal/OS_trial_8_g0_2	1	22.4816	153	0.0215999999999994
360	OS	gfp-control	2020-08-25_OS_signal/OS_trial_8_g0_2	1	26.204	159	0.0263999999999989
361	GD	gfp-control	2020-08-25_GD_signal/GD_trial_1_g0_2	0	24.6032	223	0.0240000000000009
362	GD	gfp-control	2020-08-25_GD_signal/GD_trial_2_g0_2	1	16.1864	122	0.0200000000000031
363	GD	gfp-control	2020-08-25_GD_signal/GD_trial_2_g0_2	1	26.3856	186	0.0351999999999997
364	GD	gfp-control	2020-08-25_GD_signal/GD_trial_3_g0_2	0	7.5184	181	0.0367999999999995
365	GD	gfp-control	2020-08-25_GD_signal/GD_trial_4_g0_2	1	10.0872	107	0.0304000000000002
366	GD	gfp-control	2020-08-25_GD_signal/GD_trial_6_g0_2	1	0.1168	130	0.021599999999999
367	GD	gfp-control	2020-08-25_GD_signal/GD_trial_6_g0_2	1	7.848	136	0.0376000000000003
368	GD	gfp-control	2020-08-25_GD_signal/GD_trial_6_g0_2	1	14.9496	160	0.0432000000000006
369	GD	gfp-control	2020-08-25_GD_signal/GD_trial_6_g0_2	1	14.9832	105	0.032
370	GD	gfp-control	2020-08-25_GD_signal/GD_trial_8_g0_2	1	14.0952	165	0.0559999999999992
371	GD	gfp-control	2020-08-25_GD_signal/GD_trial_8_g0_2	1	15.932	110	0.0224000000000011
372	GD	gfp-control	2020-08-25_GD_signal/GD_trial_8_g0_2	1	26.1512	93	0.0223999999999975
373	GD	gfp-control	2020-08-25_GD_signal/GD_trial_8_g0_2	1	28.7408	176	0.0399999999999991
374	GD	gfp-control	2020-08-25_GD_signal/GD_trial_9_g0_2	0	7.9432	162	0.0591999999999997
375	GD	gfp-control	2020-08-25_GD_signal/GD_trial_9_g0_2	0	10.6592	153	0.0608000000000004
376	GD	gfp-control	2020-08-25_GD_signal/GD_trial_9_g0_2	0	18.4408	176	0.0295999999999985
377	OS	gfp-control	2020-08-26_OS_signal/OS_trial_1_g0_2	0	11.788	125	0.0231999999999992
378	OS	gfp-control	2020-08-26_OS_signal/OS_trial_1_g0_2	0	15.428	215	0.0256000000000007
379	OS	gfp-control	2020-08-26_OS_signal/OS_trial_5_g0_2	0	3.768	134	0.0296000000000003
380	OS	gfp-control	2020-08-26_OS_signal/OS_trial_5_g0_2	0	7.2704	108	0.0255999999999998
381	OS	gfp-control	2020-08-26_OS_signal/OS_trial_7_g0_2	0	10.2968	133	0.0231999999999992
382	OS	gfp-control	2020-08-26_OS_signal/OS_trial_7_g0_2	0	15.1064	144	0.025599999999999
383	OS	gfp-control	2020-08-26_OS_signal/OS_trial_7_g0_2	0	20.8584	207	0.0224000000000011
384	OS	gfp-control	2020-08-26_OS_signal/OS_trial_8_g0_2	1	3.7312	173	0.0208000000000004
385	OS	gfp-control	2020-08-26_OS_signal/OS_trial_8_g0_2	1	12.0136	157	0.0399999999999991
386	OS	gfp-control	2020-08-26_OS_signal/OS_trial_9_g0_2	0	10.72	178	0.0327999999999999
387	OS	gfp-control	2020-08-26_OS_signal/OS_trial_10_g0_2	1	4.984	185	0.0407999999999999
388	OS	gfp-control	2020-08-26_OS_signal/OS_trial_10_g0_2	1	18.824	102	0.0208000000000013
389	OS	gfp-control	2020-08-26_OS_signal/OS_trial_10_g0_2	1	26.4928	147	0.0272000000000006
390	OS	gfp-control	2020-08-26_OS_signal/OS_trial_10_g0_2	1	35.804	105	0.0232000000000028
391	GD	gfp-control	2020-08-26_GD_signal/GD_trial_10_g0_2	1	24.804	146	0.0408000000000008
392	OS	gfp-control	2020-08-27_OS_signal/OS_trial_2_g0_2	1	15.7304	150	0.032
393	OS	gfp-control	2020-08-27_OS_signal/OS_trial_4_g0_2	1	8.0168	165	0.0296000000000003
394	OS	gfp-control	2020-08-27_OS_signal/OS_trial_5_g0_2	0	11.6344	114	0.0279999999999987
395	OS	gfp-control	2020-08-27_OS_signal/OS_trial_7_g0_2	0	9.4448	186	0.0359999999999996
396	OS	gfp-control	2020-08-27_OS_signal/OS_trial_7_g0_2	0	9.556	136	0.0343999999999998
397	OS	gfp-control	2020-08-27_OS_signal/OS_trial_7_g0_2	0	17.8568	121	0.0240000000000009
398	OS	gfp-control	2020-08-27_OS_signal/OS_trial_8_g0_2	1	5.5376	97	0.0263999999999998
399	OS	gfp-control	2020-08-27_OS_signal/OS_trial_9_g0_2	0	30.6112	204	0.0263999999999989
400	OS	gfp-control	2020-08-27_OS_signal/OS_trial_10_g0_2	1	9.2072	144	0.0432000000000006
401	GD	gfp-control	2020-08-27_GD_signal/GD_trial_1_g0_2	0	16.4512	101	0.0335999999999999
402	GD	gfp-control	2020-08-27_GD_signal/GD_trial_1_g0_2	0	23.8688	137	0.0231999999999992
403	GD	gfp-control	2020-08-27_GD_signal/GD_trial_2_g0_2	1	20.4392	108	0.0248000000000026
404	GD	gfp-control	2020-08-27_GD_signal/GD_trial_6_g0_2	1	12.8184	108	0.0271999999999988
405	GD	gfp-control	2020-08-27_GD_signal/GD_trial_6_g0_2	1	22.144	174	0.0456000000000003
406	GD	gfp-control	2020-08-27_GD_signal/GD_trial_8_g0_2	1	5.1576	88	0.0224000000000002
407	OS	gfp-control	2020-08-28_OS_signal/OS_trial_1_g0_2	0	7.3952	150	0.0304000000000002
408	OS	gfp-control	2020-08-28_OS_signal/OS_trial_4_g0_2	1	3.9504	174	0.044
409	OS	gfp-control	2020-08-28_OS_signal/OS_trial_4_g0_2	1	13.1176	160	0.0272000000000006
410	OS	gfp-control	2020-08-28_OS_signal/OS_trial_5_g0_2	0	4.292	101	0.0271999999999997
411	OS	gfp-control	2020-08-28_OS_signal/OS_trial_5_g0_2	0	5.3792	127	0.1248
412	OS	gfp-control	2020-08-28_OS_signal/OS_trial_5_g0_2	0	7.8824	172	0.0359999999999996
413	OS	gfp-control	2020-08-28_OS_signal/OS_trial_6_g0_2	1	14.6984	128	0.0312000000000001
414	OS	gfp-control	2020-08-28_OS_signal/OS_trial_7_g0_2	0	3.74	172	0.0343999999999998
415	OS	gfp-control	2020-08-28_OS_signal/OS_trial_7_g0_2	0	8.3736	80	0.0208000000000013
416	OS	gfp-control	2020-08-28_OS_signal/OS_trial_7_g0_2	0	29.5024	133	0.0199999999999996
417	OS	gfp-control	2020-08-28_OS_signal/OS_trial_8_g0_2	1	4.2528	151	0.032
418	OS	gfp-control	2020-08-28_OS_signal/OS_trial_8_g0_2	1	4.8568	119	0.0216000000000003
419	OS	gfp-control	2020-08-28_OS_signal/OS_trial_8_g0_2	1	6.7848	128	0.0295999999999994
420	OS	gfp-control	2020-08-28_OS_signal/OS_trial_8_g0_2	1	11.264	141	0.0359999999999996
421	OS	gfp-control	2020-08-28_OS_signal/OS_trial_8_g0_2	1	13.6184	121	0.0215999999999994
422	OS	gfp-control	2020-08-28_OS_signal/OS_trial_8_g0_2	1	29.5128	191	0.0359999999999978
423	GD	gfp-control	2020-08-28_GD_signal/GD_trial_2_g0_2	1	7.8448	129	0.0271999999999997
424	GD	gfp-control	2020-08-28_GD_signal/GD_trial_2_g0_2	1	32.1224	137	0.0231999999999957
425	GD	gfp-control	2020-08-28_GD_signal/GD_trial_9_g0_2	0	31.8768	198	0.0280000000000022
426	GD	gfp-control	2020-08-28_GD_signal/GD_trial_9_g0_2	0	55.6312	156	0.0407999999999973
427	GD	gfp-control	2020-08-28_GD_signal/GD_trial_9_g0_2	0	62.8688	149	0.0551999999999992
428	GD	gfp-control	2020-08-28_GD_signal/GD_trial_10_g0_2	1	44.3336	182	0.0367999999999995
429	GD	gfp-control	2020-08-28_GD_signal/GD_trial_10_g0_2	1	47.2792	203	0.0320000000000036
430	OS	gfp-control	2020-08-29_OS_signal/OS_trial_3_g0_2	0	18.7448	135	0.0272000000000006
431	OS	gfp-control	2020-08-29_OS_signal/OS_trial_3_g0_2	0	19.0832	147	0.0519999999999996
432	OS	gfp-control	2020-08-29_OS_signal/OS_trial_4_g0_2	1	3.3536	172	0.0295999999999998
433	OS	gfp-control	2020-08-29_OS_signal/OS_trial_9_g0_2	0	3.9288	150	0.0503999999999998
434	OS	gfp-control	2020-08-29_OS_signal/OS_trial_9_g0_2	0	4.016	99	0.0224000000000002
435	OS	gfp-control	2020-08-29_OS_signal/OS_trial_10_g0_2	1	4.26	159	0.0423999999999998
436	GD	gfp-control	2020-08-29_GD_signal/GD_trial_2_g0_2	1	18.1	172	0.0440000000000005
437	GD	gfp-control	2020-08-29_GD_signal/GD_trial_6_g0_2	1	9.4704	152	0.0360000000000014
438	GD	gfp-control	2020-08-29_GD_signal/GD_trial_8_g0_2	1	5.9648	133	0.048
439	GD	gfp-control	2020-08-29_GD_signal/GD_trial_8_g0_2	1	9.0288	99	0.0207999999999995
440	GD	gfp-control	2020-08-29_GD_signal/GD_trial_8_g0_2	1	25.9072	97	0.0208000000000013
441	GD	gfp-control	2020-08-29_GD_signal/GD_trial_9_g0_2	0	6.2216	185	0.0360000000000005
442	GD	gfp-control	2020-08-29_GD_signal/GD_trial_9_g0_2	0	6.5904	105	0.0311999999999992
