# Supplementary material for: Make Friends With The Googlebot
Source: eLife journal article supplement (doi:10.7554/elife.65998), 2005-03-14
Supplement: supp [file elife-65998-supp-v1.zip › elife_poa_e65998_Figure_4_source_data_1.csv]

	date	animal	peak_t	trial_id	trial_rank	laserOn
1	2019-11-13	PT	6.7336	2019-11-13_PT_signal/PT_trial_1_g0_2	1	0
2	2019-11-13	PT	9.1296	2019-11-13_PT_signal/PT_trial_1_g0_2	1	0
3	2019-11-13	PT	12.6176	2019-11-13_PT_signal/PT_trial_1_g0_2	1	0
4	2019-11-13	PT	14.748	2019-11-13_PT_signal/PT_trial_1_g0_2	1	0
5	2019-11-13	PT	20.8128	2019-11-13_PT_signal/PT_trial_1_g0_2	1	0
6	2019-11-13	PT	1.0408	2019-11-13_PT_signal/PT_trial_2_g0_0	1	1
7	2019-11-13	PT	14.8904	2019-11-13_PT_signal/PT_trial_2_g0_2	1	1
8	2019-11-13	PT	14.9496	2019-11-13_PT_signal/PT_trial_2_g0_2	1	1
9	2019-11-13	PT	3.2256	2019-11-13_PT_signal/PT_trial_3_g0_2	2	0
10	2019-11-13	PT	7.9776	2019-11-13_PT_signal/PT_trial_3_g0_2	2	0
11	2019-11-13	PT	9.5808	2019-11-13_PT_signal/PT_trial_3_g0_2	2	0
12	2019-11-13	PT	10.128	2019-11-13_PT_signal/PT_trial_3_g0_2	2	0
13	2019-11-13	PT	11.4536	2019-11-13_PT_signal/PT_trial_3_g0_2	2	0
14	2019-11-13	PT	16.9904	2019-11-13_PT_signal/PT_trial_3_g0_2	2	0
15	2019-11-13	PT	17.8912	2019-11-13_PT_signal/PT_trial_3_g0_2	2	0
16	2019-11-13	PT	23.8744	2019-11-13_PT_signal/PT_trial_3_g0_2	2	0
17	2019-11-13	PT	36.9232	2019-11-13_PT_signal/PT_trial_3_g0_2	2	0
18	2019-11-13	PT	37.5312	2019-11-13_PT_signal/PT_trial_3_g0_2	2	0
19	2019-11-13	PT	1.9104	2019-11-13_PT_signal/PT_trial_4_g0_0	2	1
20	2019-11-13	PT	12.8048	2019-11-13_PT_signal/PT_trial_4_g0_2	2	1
21	2019-11-13	PT	13.8928	2019-11-13_PT_signal/PT_trial_5_g0_2	3	0
22	2019-11-13	PT	18.1152	2019-11-13_PT_signal/PT_trial_5_g0_2	3	0
23	2019-11-13	PT	28.92	2019-11-13_PT_signal/PT_trial_5_g0_2	3	0
24	2019-11-13	PT	16.0672	2019-11-13_PT_signal/PT_trial_6_g0_2	3	1
25	2019-11-13	PT	0.04	2019-11-13_PT_signal/PT_trial_6_g0_0	3	1
26	2019-11-13	PT	2.7912	2019-11-13_PT_signal/PT_trial_6_g0_0	3	1
27	2019-11-13	PT	4.9688	2019-11-13_PT_signal/PT_trial_6_g0_0	3	1
28	2019-11-13	PT	8.8984	2019-11-13_PT_signal/PT_trial_6_g0_2	3	1
29	2019-11-13	PT	10.1344	2019-11-13_PT_signal/PT_trial_6_g0_2	3	1
30	2019-11-13	PT	12.3352	2019-11-13_PT_signal/PT_trial_6_g0_2	3	1
31	2019-11-13	PT	15.62	2019-11-13_PT_signal/PT_trial_6_g0_2	3	1
32	2019-11-13	PT	9.9624	2019-11-13_PT_signal/PT_trial_7_g0_2	4	0
33	2019-11-13	PT	7.4456	2019-11-13_PT_signal/PT_trial_7_g0_2	4	0
34	2019-11-13	PT	7.9896	2019-11-13_PT_signal/PT_trial_7_g0_2	4	0
35	2019-11-13	PT	14.168	2019-11-13_PT_signal/PT_trial_7_g0_2	4	0
36	2019-11-13	PT	16.5416	2019-11-13_PT_signal/PT_trial_7_g0_2	4	0
37	2019-11-13	PT	16.6928	2019-11-13_PT_signal/PT_trial_7_g0_2	4	0
38	2019-11-13	PT	18.1152	2019-11-13_PT_signal/PT_trial_7_g0_2	4	0
39	2019-11-13	PT	0.7456	2019-11-13_PT_signal/PT_trial_8_g0_2	4	1
40	2019-11-13	PT	3.484	2019-11-13_PT_signal/PT_trial_8_g0_2	4	1
41	2019-11-13	PT	19.4608	2019-11-13_PT_signal/PT_trial_8_g0_2	4	1
42	2019-11-13	PT	4.1136	2019-11-13_PT_signal/PT_trial_9_g0_0	5	0
43	2019-11-13	PT	6.1112	2019-11-13_PT_signal/PT_trial_9_g0_2	5	0
44	2019-11-13	PT	8.376	2019-11-13_PT_signal/PT_trial_9_g0_2	5	0
45	2019-11-13	PT	10.9368	2019-11-13_PT_signal/PT_trial_9_g0_2	5	0
46	2019-11-13	PT	11.9296	2019-11-13_PT_signal/PT_trial_9_g0_2	5	0
47	2019-11-13	PT	15.088	2019-11-13_PT_signal/PT_trial_9_g0_2	5	0
48	2019-11-13	PT	4.5544	2019-11-13_PT_signal/PT_trial_10_g0_2	5	1
49	2019-11-13	PT	22.4792	2019-11-13_PT_signal/PT_trial_10_g0_2	5	1
