# Supplementary material for: Make Friends With The Googlebot
Source: eLife journal article supplement (doi:10.7554/elife.65998), 2005-03-14
Supplement: supp [file elife-65998-supp-v1.zip › elife_poa_e65998_Figure_4_source_data_2.csv]

	exp	animal	correct	has_ripples.pct	n
1	gfp-control	GD	0	0.238095238095238	21
2	gfp-control	GD	1	0.777777777777778	9
3	gfp-control	OS	0	1	3
4	gfp-control	OS	1	0.909090909090909	22
5	main-effect	BR	0	0	4
6	main-effect	BR	1	0.928571428571429	14
7	main-effect	BS	0	0.230769230769231	13
8	main-effect	BS	1	0.894736842105263	19
9	main-effect	OS	0	0.166666666666667	6
10	main-effect	OS	1	0.727272727272727	11
11	main-effect	PT	0	0.4	10
12	main-effect	PT	1	1	15
13	main-effect	TL	0	0.4	5
14	main-effect	TL	1	0.416666666666667	24
