# Supplementary material for: Make Friends With The Googlebot
Source: eLife journal article supplement (doi:10.7554/elife.65998), 2005-03-14
Supplement: supp [file elife-65998-supp-v1.zip › elife_poa_e65998_Figure_4_source_data_3.csv]

	exp	animal	learning_day	swr_incidence
1	main-effect	PT	1	0.138115442411385
2	main-effect	OS	1	0.0757162759706827
3	main-effect	BS	1	0
4	main-effect	PT	2	0.054166486111713
5	main-effect	PT	2	0.106972923013727
6	main-effect	PT	2	0.127343113284434
7	main-effect	BS	2	0.0887028101050241
8	main-effect	BS	2	0.0598802395209581
9	main-effect	BS	2	0.0193211326820824
10	main-effect	PT	3	0.0272088113014519
11	main-effect	PT	3	0.235537968720558
12	main-effect	PT	3	0.171694452552238
13	main-effect	BS	3	0.0286638079295558
14	main-effect	BS	3	0.110178268438333
15	main-effect	BS	3	0
16	main-effect	BS	3	0.14052838673412
17	main-effect	BS	3	0.0173881593590029
18	main-effect	OS	3	0
19	main-effect	BS	4	0
20	main-effect	BS	4	0.0761475434802473
21	main-effect	PT	5	0.12729902030674
22	main-effect	PT	5	0.113068451640623
23	main-effect	PT	5	0.138149533054578
24	main-effect	OS	5	0
25	main-effect	OS	5	0
26	main-effect	OS	5	0
27	main-effect	OS	5	0.223573600429261
28	main-effect	OS	5	0.137900601246621
29	main-effect	BS	5	0.0934355892422
30	main-effect	BS	5	0.0848733124356377
31	main-effect	BS	5	0.0222099820543345
32	main-effect	PT	6	0.0728466529391196
33	main-effect	PT	6	0.270785494562627
34	main-effect	PT	6	0.0285949581369813
35	main-effect	PT	6	0.114589540266764
36	main-effect	PT	6	0.118593012499704
37	main-effect	OS	6	0.0723337769804988
38	main-effect	OS	6	0
39	main-effect	OS	6	0.0371393766527023
40	main-effect	OS	6	0.0388597009357416
41	main-effect	BS	6	0.0487338934482154
42	main-effect	BS	6	0.112263684943195
43	main-effect	BS	6	0.0273391365207121
44	main-effect	BS	6	0.0923105326317733
45	main-effect	BS	6	0
46	main-effect	BR	1	0.0998801438274071
47	main-effect	BR	1	0.135261866974463
48	main-effect	BR	1	0.108516364267732
49	main-effect	BR	1	0.0545637085861452
50	main-effect	TL	1	0
51	main-effect	TL	1	0
52	main-effect	BR	2	0.0485757587533517
53	main-effect	BR	2	0.0985921047442521
54	main-effect	TL	2	0
55	main-effect	TL	2	0.108386984890854
56	main-effect	TL	2	0.120157646832644
57	main-effect	TL	3	0
58	main-effect	TL	3	0
59	main-effect	TL	3	0
60	main-effect	TL	3	0
61	main-effect	TL	3	0
62	main-effect	BR	4	0.0501403931006819
63	main-effect	BR	4	0.118169786349026
64	main-effect	BR	4	0.090780347870293
65	main-effect	BR	4	0.0542628928633443
66	main-effect	BR	4	0.15127677598935
67	main-effect	TL	4	0.102207686017989
68	main-effect	TL	4	0
69	main-effect	TL	4	0.124870966667777
70	main-effect	TL	4	0
71	main-effect	TL	4	0.114863312657937
72	main-effect	BR	5	0.11034604519774
73	main-effect	BR	5	0.20748035852606
74	main-effect	BR	5	0
75	main-effect	TL	5	0
76	main-effect	TL	5	0
77	main-effect	TL	5	0
78	main-effect	TL	5	0
79	main-effect	TL	6	0
80	main-effect	TL	6	0
81	main-effect	TL	6	0
82	main-effect	TL	6	0
83	main-effect	TL	6	0
84	gfp-control	OS	1	0.0816246571764399
85	gfp-control	OS	1	0.0799079460461548
86	gfp-control	OS	1	0.157341557052049
87	gfp-control	GD	1	0
88	gfp-control	OS	2	0.031855249745158
89	gfp-control	OS	2	0.0320020481310804
90	gfp-control	OS	2	0.101681127982646
91	gfp-control	OS	2	0
92	gfp-control	GD	2	0.0565559677857208
93	gfp-control	GD	2	0.0427569693860099
94	gfp-control	GD	2	0.144737349955614
95	gfp-control	OS	3	0.0526027858435383
96	gfp-control	OS	3	0.0743229182150608
97	gfp-control	OS	3	0.0549378103986288
98	gfp-control	GD	3	0
99	gfp-control	OS	4	0
100	gfp-control	OS	4	0
101	gfp-control	OS	4	0.0346260387811634
102	gfp-control	OS	4	0.0525143889425703
103	gfp-control	OS	4	0.0315417612919505
104	gfp-control	GD	4	0
105	gfp-control	OS	5	0.0520920153358893
106	gfp-control	OS	5	0
107	gfp-control	OS	5	0.0334439212328767
108	gfp-control	OS	5	0.0361125556133357
109	gfp-control	GD	5	0.106849783451106
110	gfp-control	OS	6	0.0496425734710087
111	gfp-control	OS	6	0.0416944629753169
112	gfp-control	OS	6	0.043222683264177
113	gfp-control	GD	6	0
114	gfp-control	GD	6	0.0556991355494163
