# Supplementary material for: Make Friends With The Googlebot
Source: eLife journal article supplement (doi:10.7554/elife.65998), 2005-03-14
Supplement: supp [file elife-65998-supp-v1.zip › elife_poa_e65998_Figure_4_source_data_4.csv]

	exp	animal	learning_day	trial_id	laserOn	swr_incidence
1	main-effect	PT	1	2019-11-06_PT_signal/PT_trial_4_g0_2	1	0.0568181818181818
2	main-effect	PT	1	2019-11-06_PT_signal/PT_trial_5_g0_2	0	0.138115442411385
3	main-effect	PT	1	2019-11-06_PT_signal/PT_trial_8_g0_2	1	0
4	main-effect	OS	1	2019-11-06_OS_signal/OS_trial_3_g0_2	0	0.0757162759706827
5	main-effect	OS	1	2019-11-06_OS_signal/OS_trial_4_g0_2	1	0
6	main-effect	OS	1	2019-11-06_OS_signal/OS_trial_6_g0_2	1	0
7	main-effect	OS	1	2019-11-06_OS_signal/OS_trial_10_g0_2	1	0.0319456157836898
8	main-effect	BS	1	2019-11-06_BS_signal/BS_trial_2_g0_2	1	0.0411407507364194
9	main-effect	BS	1	2019-11-06_BS_signal/BS_trial_3_g0_2	0	0
10	main-effect	BS	1	2019-11-06_BS_signal/BS_trial_4_g0_2	1	0
11	main-effect	PT	2	2019-11-07_PT_signal/PT_trial_3_g0_2	0	0.054166486111713
12	main-effect	PT	2	2019-11-07_PT_signal/PT_trial_4_g0_2	1	0.0953634300318514
13	main-effect	PT	2	2019-11-07_PT_signal/PT_trial_5_g0_2	0	0.106972923013727
14	main-effect	PT	2	2019-11-07_PT_signal/PT_trial_9_g0_2	0	0.127343113284434
15	main-effect	BS	2	2019-11-07_BS_signal/BS_trial_2_g0_2	1	0
16	main-effect	BS	2	2019-11-07_BS_signal/BS_trial_3_g0_2	0	0.0887028101050241
17	main-effect	BS	2	2019-11-07_BS_signal/BS_trial_4_g0_2	1	0.0242812742812743
18	main-effect	BS	2	2019-11-07_BS_signal/BS_trial_5_g0_2	0	0.0598802395209581
19	main-effect	BS	2	2019-11-07_BS_signal/BS_trial_8_g0_2	1	0.0428821370170042
20	main-effect	BS	2	2019-11-07_BS_signal/BS_trial_9_g0_2	0	0.0193211326820824
21	main-effect	BS	2	2019-11-07_BS_signal/BS_trial_10_g0_2	1	0
22	main-effect	PT	3	2019-11-08_PT_signal/PT_trial_3_g0_2	0	0.0272088113014519
23	main-effect	PT	3	2019-11-08_PT_signal/PT_trial_6_g0_2	0	0.235537968720558
24	main-effect	PT	3	2019-11-08_PT_signal/PT_trial_9_g0_2	0	0.171694452552238
25	main-effect	BS	3	2019-11-08_BS_signal/BS_trial_1_g0_2	0	0.0286638079295558
26	main-effect	BS	3	2019-11-08_BS_signal/BS_trial_2_g0_2	0	0.110178268438333
27	main-effect	BS	3	2019-11-08_BS_signal/BS_trial_7_g0_2	0	0
28	main-effect	BS	3	2019-11-08_BS_signal/BS_trial_9_g0_2	0	0.14052838673412
29	main-effect	BS	3	2019-11-08_BS_signal/BS_trial_10_g0_2	0	0.0173881593590029
30	main-effect	OS	3	2019-11-11_OS_signal/OS_trial_3_g0_2	0	0
31	main-effect	OS	3	2019-11-11_OS_signal/OS_trial_4_g0_2	1	0
32	main-effect	OS	3	2019-11-11_OS_signal/OS_trial_6_g0_2	1	0
33	main-effect	OS	3	2019-11-11_OS_signal/OS_trial_10_g0_2	1	0
34	main-effect	BS	4	2019-11-11_BS_signal/BS_trial_2_g0_2	1	0.0815855887216082
35	main-effect	BS	4	2019-11-11_BS_signal/BS_trial_7_g0_2	0	0
36	main-effect	BS	4	2019-11-11_BS_signal/BS_trial_8_g0_2	1	0.0442008486562942
37	main-effect	BS	4	2019-11-11_BS_signal/BS_trial_9_g0_2	0	0.0761475434802473
38	main-effect	BS	4	2019-11-11_BS_signal/BS_trial_10_g0_2	1	0.0172416171257535
39	main-effect	PT	5	2019-11-12_PT_signal/PT_trial_2_g0_2	1	0.0703894885030502
40	main-effect	PT	5	2019-11-12_PT_signal/PT_trial_5_g0_2	0	0.12729902030674
41	main-effect	PT	5	2019-11-12_PT_signal/PT_trial_7_g0_2	0	0.113068451640623
42	main-effect	PT	5	2019-11-12_PT_signal/PT_trial_9_g0_2	0	0.138149533054578
43	main-effect	PT	5	2019-11-12_PT_signal/PT_trial_10_g0_2	1	0.141897644499101
44	main-effect	OS	5	2019-11-12_OS_signal/OS_trial_1_g0_2	0	0
45	main-effect	OS	5	2019-11-12_OS_signal/OS_trial_2_g0_2	1	0
46	main-effect	OS	5	2019-11-12_OS_signal/OS_trial_3_g0_2	0	0
47	main-effect	OS	5	2019-11-12_OS_signal/OS_trial_4_g0_2	1	0
48	main-effect	OS	5	2019-11-12_OS_signal/OS_trial_5_g0_2	0	0
49	main-effect	OS	5	2019-11-12_OS_signal/OS_trial_6_g0_2	1	0
50	main-effect	OS	5	2019-11-12_OS_signal/OS_trial_7_g0_2	0	0.223573600429261
51	main-effect	OS	5	2019-11-12_OS_signal/OS_trial_8_g0_2	1	0
52	main-effect	OS	5	2019-11-12_OS_signal/OS_trial_9_g0_2	0	0.137900601246621
53	main-effect	OS	5	2019-11-12_OS_signal/OS_trial_10_g0_2	1	0
54	main-effect	BS	5	2019-11-12_BS_signal/BS_trial_2_g0_2	1	0.0853510317232715
55	main-effect	BS	5	2019-11-12_BS_signal/BS_trial_3_g0_2	0	0.0934355892422
56	main-effect	BS	5	2019-11-12_BS_signal/BS_trial_5_g0_2	0	0.0848733124356377
57	main-effect	BS	5	2019-11-12_BS_signal/BS_trial_7_g0_2	0	0.0222099820543345
58	main-effect	BS	5	2019-11-12_BS_signal/BS_trial_8_g0_2	1	0.0232679349242396
59	main-effect	BS	5	2019-11-12_BS_signal/BS_trial_10_g0_2	1	0
60	main-effect	PT	6	2019-11-13_PT_signal/PT_trial_1_g0_2	0	0.0728466529391196
61	main-effect	PT	6	2019-11-13_PT_signal/PT_trial_2_g0_2	1	0.0529167725002117
62	main-effect	PT	6	2019-11-13_PT_signal/PT_trial_3_g0_2	0	0.270785494562627
63	main-effect	PT	6	2019-11-13_PT_signal/PT_trial_4_g0_2	1	0.0612055035988836
64	main-effect	PT	6	2019-11-13_PT_signal/PT_trial_5_g0_2	0	0.0285949581369813
65	main-effect	PT	6	2019-11-13_PT_signal/PT_trial_6_g0_2	1	0.0958539951945197
66	main-effect	PT	6	2019-11-13_PT_signal/PT_trial_7_g0_2	0	0.114589540266764
67	main-effect	PT	6	2019-11-13_PT_signal/PT_trial_8_g0_2	1	0.0530526494493135
68	main-effect	PT	6	2019-11-13_PT_signal/PT_trial_9_g0_2	0	0.118593012499704
69	main-effect	PT	6	2019-11-13_PT_signal/PT_trial_10_g0_2	1	0
70	main-effect	OS	6	2019-11-13_OS_signal/OS_trial_2_g0_2	1	0
71	main-effect	OS	6	2019-11-13_OS_signal/OS_trial_3_g0_2	0	0.0723337769804988
72	main-effect	OS	6	2019-11-13_OS_signal/OS_trial_4_g0_2	1	0
73	main-effect	OS	6	2019-11-13_OS_signal/OS_trial_5_g0_2	0	0
74	main-effect	OS	6	2019-11-13_OS_signal/OS_trial_6_g0_2	1	0
75	main-effect	OS	6	2019-11-13_OS_signal/OS_trial_7_g0_2	0	0.0371393766527023
76	main-effect	OS	6	2019-11-13_OS_signal/OS_trial_8_g0_2	1	0
77	main-effect	OS	6	2019-11-13_OS_signal/OS_trial_9_g0_2	0	0.0388597009357416
78	main-effect	OS	6	2019-11-13_OS_signal/OS_trial_10_g0_2	1	0.100072051877352
79	main-effect	BS	6	2019-11-13_BS_signal/BS_trial_1_g0_2	0	0.0487338934482154
80	main-effect	BS	6	2019-11-13_BS_signal/BS_trial_2_g0_2	1	0
81	main-effect	BS	6	2019-11-13_BS_signal/BS_trial_3_g0_2	0	0.112263684943195
82	main-effect	BS	6	2019-11-13_BS_signal/BS_trial_5_g0_2	0	0.0273391365207121
83	main-effect	BS	6	2019-11-13_BS_signal/BS_trial_6_g0_2	1	0.049395400300324
84	main-effect	BS	6	2019-11-13_BS_signal/BS_trial_7_g0_2	0	0.0923105326317733
85	main-effect	BS	6	2019-11-13_BS_signal/BS_trial_8_g0_2	1	0.0538201545714839
86	main-effect	BS	6	2019-11-13_BS_signal/BS_trial_9_g0_2	0	0
87	main-effect	BS	6	2019-11-13_BS_signal/BS_trial_10_g0_2	1	0.0472223796301543
88	main-effect	BR	1	2020-08-24_BR_signal/BR_trial_2_g0_2	1	0.0840788323131768
89	main-effect	BR	1	2020-08-24_BR_signal/BR_trial_3_g0_2	0	0.0998801438274071
90	main-effect	BR	1	2020-08-24_BR_signal/BR_trial_4_g0_2	1	0.127265322744858
91	main-effect	BR	1	2020-08-24_BR_signal/BR_trial_5_g0_2	0	0.135261866974463
92	main-effect	BR	1	2020-08-24_BR_signal/BR_trial_6_g0_2	1	0.089423042529599
93	main-effect	BR	1	2020-08-24_BR_signal/BR_trial_7_g0_2	0	0.108516364267732
94	main-effect	BR	1	2020-08-24_BR_signal/BR_trial_8_g0_2	1	0.0781396511845971
95	main-effect	BR	1	2020-08-24_BR_signal/BR_trial_9_g0_2	0	0.0545637085861452
96	main-effect	BR	1	2020-08-24_BR_signal/BR_trial_10_g0_2	1	0
97	main-effect	TL	1	2020-08-24_TL_signal/TL_trial_2_g0_2	1	0
98	main-effect	TL	1	2020-08-24_TL_signal/TL_trial_4_g0_2	1	0
99	main-effect	TL	1	2020-08-24_TL_signal/TL_trial_6_g0_2	1	0
100	main-effect	TL	1	2020-08-24_TL_signal/TL_trial_7_g0_2	0	0
101	main-effect	TL	1	2020-08-24_TL_signal/TL_trial_8_g0_2	1	0
102	main-effect	TL	1	2020-08-24_TL_signal/TL_trial_9_g0_2	0	0
103	main-effect	BR	2	2020-08-25_BR_signal/BR_trial_4_g0_2	1	0.115489444264794
104	main-effect	BR	2	2020-08-25_BR_signal/BR_trial_7_g0_2	0	0.0485757587533517
105	main-effect	BR	2	2020-08-25_BR_signal/BR_trial_8_g0_2	1	0.150979859286771
106	main-effect	BR	2	2020-08-25_BR_signal/BR_trial_9_g0_2	0	0.0985921047442521
107	main-effect	BR	2	2020-08-25_BR_signal/BR_trial_10_g0_2	1	0.0708121683630115
108	main-effect	TL	2	2020-08-25_TL_signal/TL_trial_1_g0_2	0	0
109	main-effect	TL	2	2020-08-25_TL_signal/TL_trial_4_g0_2	1	0
110	main-effect	TL	2	2020-08-25_TL_signal/TL_trial_6_g0_2	0	0.108386984890854
111	main-effect	TL	2	2020-08-25_TL_signal/TL_trial_9_g0_2	0	0.120157646832644
112	main-effect	TL	3	2020-08-26_TL_signal/TL_trial_1_g0_2	0	0
113	main-effect	TL	3	2020-08-26_TL_signal/TL_trial_2_g0_2	1	0
114	main-effect	TL	3	2020-08-26_TL_signal/TL_trial_3_g0_2	0	0
115	main-effect	TL	3	2020-08-26_TL_signal/TL_trial_5_g0_2	0	0
116	main-effect	TL	3	2020-08-26_TL_signal/TL_trial_6_g0_2	1	0
117	main-effect	TL	3	2020-08-26_TL_signal/TL_trial_7_g0_2	0	0
118	main-effect	TL	3	2020-08-26_TL_signal/TL_trial_8_g0_2	1	0
119	main-effect	TL	3	2020-08-26_TL_signal/TL_trial_9_g0_2	0	0
120	main-effect	TL	3	2020-08-26_TL_signal/TL_trial_10_g0_2	1	0
121	main-effect	BR	4	2020-08-27_BR_signal/BR_trial_1_g0_2	0	0.0501403931006819
122	main-effect	BR	4	2020-08-27_BR_signal/BR_trial_2_g0_2	1	0.0379777602236131
123	main-effect	BR	4	2020-08-27_BR_signal/BR_trial_3_g0_2	0	0.118169786349026
124	main-effect	BR	4	2020-08-27_BR_signal/BR_trial_4_g0_2	1	0
125	main-effect	BR	4	2020-08-27_BR_signal/BR_trial_5_g0_2	0	0.090780347870293
126	main-effect	BR	4	2020-08-27_BR_signal/BR_trial_6_g0_2	1	0.0422183193731424
127	main-effect	BR	4	2020-08-27_BR_signal/BR_trial_7_g0_2	0	0.0542628928633443
128	main-effect	BR	4	2020-08-27_BR_signal/BR_trial_8_g0_2	1	0.135494011164707
129	main-effect	BR	4	2020-08-27_BR_signal/BR_trial_9_g0_2	0	0.15127677598935
130	main-effect	BR	4	2020-08-27_BR_signal/BR_trial_10_g0_2	1	0.0643351604518902
131	main-effect	TL	4	2020-08-27_TL_signal/TL_trial_1_g0_2	0	0.102207686017989
132	main-effect	TL	4	2020-08-27_TL_signal/TL_trial_2_g0_2	1	0
133	main-effect	TL	4	2020-08-27_TL_signal/TL_trial_3_g0_2	0	0
134	main-effect	TL	4	2020-08-27_TL_signal/TL_trial_4_g0_2	1	0
135	main-effect	TL	4	2020-08-27_TL_signal/TL_trial_5_g0_2	0	0.124870966667777
136	main-effect	TL	4	2020-08-27_TL_signal/TL_trial_6_g0_2	1	0.0734063481809907
137	main-effect	TL	4	2020-08-27_TL_signal/TL_trial_7_g0_2	0	0
138	main-effect	TL	4	2020-08-27_TL_signal/TL_trial_8_g0_2	1	0
139	main-effect	TL	4	2020-08-27_TL_signal/TL_trial_9_g0_2	0	0.114863312657937
140	main-effect	BR	5	2020-08-28_BR_signal/BR_trial_1_g0_2	0	0.11034604519774
141	main-effect	BR	5	2020-08-28_BR_signal/BR_trial_2_g0_2	1	0.0409044798586341
142	main-effect	BR	5	2020-08-28_BR_signal/BR_trial_3_g0_2	0	0.20748035852606
143	main-effect	BR	5	2020-08-28_BR_signal/BR_trial_4_g0_2	1	0.0658275843909632
144	main-effect	BR	5	2020-08-28_BR_signal/BR_trial_5_g0_2	0	0
145	main-effect	BR	5	2020-08-28_BR_signal/BR_trial_6_g0_2	1	0
146	main-effect	TL	5	2020-08-28_TL_signal/TL_trial_1_g0_2	0	0
147	main-effect	TL	5	2020-08-28_TL_signal/TL_trial_2_g0_2	1	0.042721897535801
148	main-effect	TL	5	2020-08-28_TL_signal/TL_trial_3_g0_2	0	0
149	main-effect	TL	5	2020-08-28_TL_signal/TL_trial_4_g0_2	1	0
150	main-effect	TL	5	2020-08-28_TL_signal/TL_trial_5_g0_2	0	0
151	main-effect	TL	5	2020-08-28_TL_signal/TL_trial_6_g0_2	1	0
152	main-effect	TL	5	2020-08-28_TL_signal/TL_trial_7_g0_2	0	0
153	main-effect	TL	5	2020-08-28_TL_signal/TL_trial_8_g0_2	1	0
154	main-effect	TL	6	2020-08-29_TL_signal/TL_trial_1_g0_2	0	0
155	main-effect	TL	6	2020-08-29_TL_signal/TL_trial_2_g0_2	1	0
156	main-effect	TL	6	2020-08-29_TL_signal/TL_trial_3_g0_2	0	0
157	main-effect	TL	6	2020-08-29_TL_signal/TL_trial_4_g0_2	1	0
158	main-effect	TL	6	2020-08-29_TL_signal/TL_trial_5_g0_2	0	0
159	main-effect	TL	6	2020-08-29_TL_signal/TL_trial_6_g0_2	1	0
160	main-effect	TL	6	2020-08-29_TL_signal/TL_trial_7_g0_2	0	0
161	main-effect	TL	6	2020-08-29_TL_signal/TL_trial_8_g0_2	1	0
162	main-effect	TL	6	2020-08-29_TL_signal/TL_trial_9_g0_2	0	0
163	main-effect	TL	6	2020-08-29_TL_signal/TL_trial_10_g0_2	1	0
164	gfp-control	OS	1	2020-08-24_OS_signal/OS_trial_3_g0_2	0	0.0816246571764399
165	gfp-control	OS	1	2020-08-24_OS_signal/OS_trial_7_g0_2	0	0.0799079460461548
166	gfp-control	OS	1	2020-08-24_OS_signal/OS_trial_8_g0_2	1	0.0753125470703419
167	gfp-control	OS	1	2020-08-24_OS_signal/OS_trial_9_g0_2	0	0.157341557052049
168	gfp-control	OS	1	2020-08-24_OS_signal/OS_trial_10_g0_2	1	0.146467210873726
169	gfp-control	GD	1	2020-08-24_GD_signal/GD_trial_1_g0_2	0	0
170	gfp-control	GD	1	2020-08-24_GD_signal/GD_trial_2_g0_2	1	0
171	gfp-control	OS	2	2020-08-25_OS_signal/OS_trial_2_g0_2	1	0.058411214953271
172	gfp-control	OS	2	2020-08-25_OS_signal/OS_trial_3_g0_2	0	0.031855249745158
173	gfp-control	OS	2	2020-08-25_OS_signal/OS_trial_4_g0_2	1	0.0389650872817955
174	gfp-control	OS	2	2020-08-25_OS_signal/OS_trial_5_g0_2	0	0.0320020481310804
175	gfp-control	OS	2	2020-08-25_OS_signal/OS_trial_7_g0_2	0	0.101681127982646
176	gfp-control	OS	2	2020-08-25_OS_signal/OS_trial_8_g0_2	1	0.0916870415647922
177	gfp-control	OS	2	2020-08-25_OS_signal/OS_trial_9_g0_2	0	0
178	gfp-control	GD	2	2020-08-25_GD_signal/GD_trial_1_g0_2	0	0.0565559677857208
179	gfp-control	GD	2	2020-08-25_GD_signal/GD_trial_2_g0_2	1	0.0413633355393779
180	gfp-control	GD	2	2020-08-25_GD_signal/GD_trial_3_g0_2	0	0.0427569693860099
181	gfp-control	GD	2	2020-08-25_GD_signal/GD_trial_4_g0_2	1	0
182	gfp-control	GD	2	2020-08-25_GD_signal/GD_trial_6_g0_2	1	0.0776084189612889
183	gfp-control	GD	2	2020-08-25_GD_signal/GD_trial_8_g0_2	1	0.0875871492134674
184	gfp-control	GD	2	2020-08-25_GD_signal/GD_trial_9_g0_2	0	0.144737349955614
185	gfp-control	OS	3	2020-08-26_OS_signal/OS_trial_1_g0_2	0	0.0526027858435383
186	gfp-control	OS	3	2020-08-26_OS_signal/OS_trial_7_g0_2	0	0.0743229182150608
187	gfp-control	OS	3	2020-08-26_OS_signal/OS_trial_8_g0_2	1	0.118746041798607
188	gfp-control	OS	3	2020-08-26_OS_signal/OS_trial_9_g0_2	0	0.0549378103986288
189	gfp-control	OS	3	2020-08-26_OS_signal/OS_trial_10_g0_2	1	0.0737260144699591
190	gfp-control	GD	3	2020-08-26_GD_signal/GD_trial_2_g0_2	1	0
191	gfp-control	GD	3	2020-08-26_GD_signal/GD_trial_3_g0_2	0	0
192	gfp-control	GD	3	2020-08-26_GD_signal/GD_trial_10_g0_2	1	0.0341157205240175
193	gfp-control	OS	4	2020-08-27_OS_signal/OS_trial_1_g0_2	0	0
194	gfp-control	OS	4	2020-08-27_OS_signal/OS_trial_2_g0_2	1	0.0809742825678565
195	gfp-control	OS	4	2020-08-27_OS_signal/OS_trial_3_g0_2	0	0
196	gfp-control	OS	4	2020-08-27_OS_signal/OS_trial_4_g0_2	1	0.0375781625781626
197	gfp-control	OS	4	2020-08-27_OS_signal/OS_trial_5_g0_2	0	0.0346260387811634
198	gfp-control	OS	4	2020-08-27_OS_signal/OS_trial_7_g0_2	0	0.0525143889425703
199	gfp-control	OS	4	2020-08-27_OS_signal/OS_trial_8_g0_2	1	0
200	gfp-control	OS	4	2020-08-27_OS_signal/OS_trial_9_g0_2	0	0.0315417612919505
201	gfp-control	OS	4	2020-08-27_OS_signal/OS_trial_10_g0_2	1	0.0482253086419753
202	gfp-control	GD	4	2020-08-27_GD_signal/GD_trial_1_g0_2	0	0
203	gfp-control	GD	4	2020-08-27_GD_signal/GD_trial_2_g0_2	1	0
204	gfp-control	GD	4	2020-08-27_GD_signal/GD_trial_6_g0_2	1	0.032705389848247
205	gfp-control	GD	4	2020-08-27_GD_signal/GD_trial_8_g0_2	1	0
206	gfp-control	OS	5	2020-08-28_OS_signal/OS_trial_1_g0_2	0	0.0520920153358893
207	gfp-control	OS	5	2020-08-28_OS_signal/OS_trial_2_g0_2	1	0
208	gfp-control	OS	5	2020-08-28_OS_signal/OS_trial_3_g0_2	0	0
209	gfp-control	OS	5	2020-08-28_OS_signal/OS_trial_4_g0_2	1	0.0671754084264832
210	gfp-control	OS	5	2020-08-28_OS_signal/OS_trial_5_g0_2	0	0.0334439212328767
211	gfp-control	OS	5	2020-08-28_OS_signal/OS_trial_6_g0_2	1	0
212	gfp-control	OS	5	2020-08-28_OS_signal/OS_trial_7_g0_2	0	0.0361125556133357
213	gfp-control	OS	5	2020-08-28_OS_signal/OS_trial_8_g0_2	1	0.10398181011535
214	gfp-control	GD	5	2020-08-28_GD_signal/GD_trial_2_g0_2	1	0
215	gfp-control	GD	5	2020-08-28_GD_signal/GD_trial_9_g0_2	0	0.106849783451106
216	gfp-control	GD	5	2020-08-28_GD_signal/GD_trial_10_g0_2	1	0.124297717893899
217	gfp-control	OS	6	2020-08-29_OS_signal/OS_trial_2_g0_2	1	0
218	gfp-control	OS	6	2020-08-29_OS_signal/OS_trial_3_g0_2	0	0.0496425734710087
219	gfp-control	OS	6	2020-08-29_OS_signal/OS_trial_4_g0_2	1	0.0567665758401453
220	gfp-control	OS	6	2020-08-29_OS_signal/OS_trial_5_g0_2	0	0.0416944629753169
221	gfp-control	OS	6	2020-08-29_OS_signal/OS_trial_8_g0_2	1	0
222	gfp-control	OS	6	2020-08-29_OS_signal/OS_trial_9_g0_2	0	0.043222683264177
223	gfp-control	OS	6	2020-08-29_OS_signal/OS_trial_10_g0_2	1	0.0719155423870207
224	gfp-control	GD	6	2020-08-29_GD_signal/GD_trial_1_g0_2	0	0
225	gfp-control	GD	6	2020-08-29_GD_signal/GD_trial_2_g0_2	1	0.0495756325850718
226	gfp-control	GD	6	2020-08-29_GD_signal/GD_trial_6_g0_2	1	0
227	gfp-control	GD	6	2020-08-29_GD_signal/GD_trial_8_g0_2	1	0
228	gfp-control	GD	6	2020-08-29_GD_signal/GD_trial_9_g0_2	0	0.0556991355494163
229	gfp-control	GD	6	2020-08-29_GD_signal/GD_trial_10_g0_2	1	0
