# Supplementary material for: Make Friends With The Googlebot
Source: eLife journal article supplement (doi:10.7554/elife.65998), 2005-03-14

**Figure 5—figure supplement 1: Spectral peak frequency of ripples and duration of SWRs during sleep**

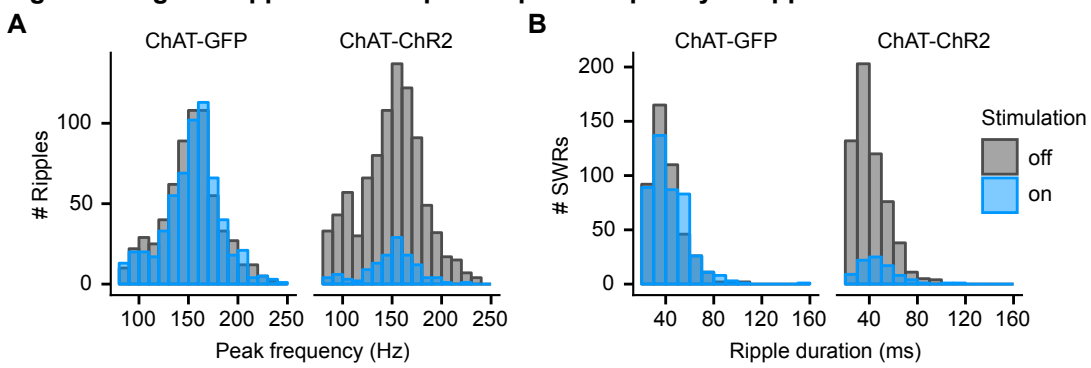

Supplement: supp [file elife-65998-supp-v1.zip › elife_poa_e65998_Figure_5_figure_supplement_1.pdf]
