# Supplementary material for: Make Friends With The Googlebot
Source: eLife journal article supplement (doi:10.7554/elife.65998), 2005-03-14
Supplement: supp [file elife-65998-supp-v1.zip › elife_poa_e65998_Figure_5_figure_supplement_1_source_data_1.csv]

	exp	animal	laserOn	peak_freq	ripple_dur
1	main-effect	GD	0	156	0.0632000000000001
2	main-effect	GD	0	98	0.0231999999999992
3	main-effect	GD	0	164	0.0520000000000014
4	main-effect	GD	0	135	0.0352000000000032
5	main-effect	GD	1	121	0.034399999999998
6	main-effect	GD	1	144	0.0503999999999998
7	main-effect	GD	1	160	0.0503999999999998
8	main-effect	GD	0	95	0.0295999999999901
9	main-effect	GD	0	111	0.0343999999999998
10	main-effect	GD	0	144	0.0631999999999899
11	main-effect	GD	0	169	0.04640000000001
12	main-effect	GD	0	90	0.0200000000000098
13	main-effect	GD	0	190	0.0352000000000103
14	main-effect	GD	0	153	0.0632000000000001
15	main-effect	GD	0	147	0.0528000000000013
16	main-effect	GD	0	144	0.0304000000000002
17	main-effect	GD	0	182	0.0352000000000396
18	main-effect	GD	0	113	0.0295999999999603
19	main-effect	GD	0	135	0.0424000000000504
20	main-effect	GD	0	96	0.0224000000000011
21	main-effect	GD	0	152	0.0599999999999987
22	main-effect	GD	0	179	0.0375999999999976
23	main-effect	GD	1	166	0.03440000000001
24	main-effect	GD	1	125	0.0232000000000303
25	main-effect	GD	1	161	0.0335999999999999
26	main-effect	GD	1	158	0.0528000000000013
27	main-effect	GD	1	168	0.0408000000000008
28	main-effect	GD	0	131	0.02240000000001
29	main-effect	GD	0	105	0.024
30	main-effect	GD	0	164	0.0304000000000504
31	main-effect	GD	0	173	0.0384000000000029
32	main-effect	GD	1	128	0.0247999999999702
33	main-effect	GD	1	81	0.0375999999999994
34	main-effect	GD	1	191	0.0207999999999995
35	main-effect	GD	1	188	0.0343999999999998
36	main-effect	GD	1	158	0.0599999999999987
37	main-effect	GD	1	141	0.041599999999999
38	main-effect	GD	1	129	0.0632000000000019
39	main-effect	GD	1	170	0.0472000000000001
40	main-effect	GD	1	152	0.0440000000000005
41	main-effect	GD	0	178	0.0447999999999995
42	main-effect	GD	0	158	0.0351999999999997
43	main-effect	GD	0	153	0.0655999999999999
44	main-effect	GD	0	124	0.0224000000001006
45	main-effect	GD	0	200	0.0304000000000002
46	main-effect	GD	0	87	0.0328000000001012
47	main-effect	GD	0	177	0.0255999999999972
48	main-effect	GD	0	118	0.0223999999998981
49	main-effect	GD	0	102	0.0263999999999989
50	main-effect	GD	0	163	0.0456000000000003
51	main-effect	GD	1	160	0.0312000000000001
52	main-effect	BS	0	194	0.0311999999999895
53	main-effect	BS	0	165	0.045600000000011
54	main-effect	BS	0	101	0.0287999999999897
55	main-effect	BS	0	142	0.0919999999999987
56	main-effect	BS	0	147	0.0535999999999994
57	main-effect	BS	1	142	0.0223999999999993
58	main-effect	BS	0	97	0.02800000000002
59	main-effect	BS	0	85	0.0256000000000007
60	main-effect	BS	0	121	0.032
61	main-effect	BS	0	170	0.0431999999999988
62	main-effect	BS	0	142	0.0583999999999989
63	main-effect	BS	0	136	0.0408000000000008
64	main-effect	BS	0	95	0.0224000000000011
65	main-effect	BS	0	158	0.0560000000000009
66	main-effect	BS	1	93	0.024
67	main-effect	BS	1	121	0.0264000000000006
68	main-effect	BS	1	188	0.0335999999999999
69	main-effect	BS	1	100	0.0215999999999994
70	main-effect	BS	1	154	0.0456000000000003
71	main-effect	BS	1	190	0.032
72	main-effect	BS	1	114	0.0272000000000006
73	main-effect	BS	1	133	0.0472000000000001
74	main-effect	BS	0	94	0.0215999999999701
75	main-effect	BS	0	166	0.0480000000000089
76	main-effect	BS	0	137	0.0272000000000006
77	main-effect	BS	0	157	0.0304000000000002
78	main-effect	BS	0	150	0.0432000000000006
79	main-effect	BS	0	153	0.0376000000000012
80	main-effect	BS	0	107	0.0263999999999989
81	main-effect	BS	0	140	0.0376000000000012
82	main-effect	BS	0	92	0.0223999999999975
83	main-effect	BS	0	86	0.0312000000000019
84	main-effect	BS	0	156	0.0319999999999998
85	main-effect	BS	0	162	0.0392000000000099
86	main-effect	BS	0	195	0.0288000000000004
87	main-effect	BS	0	154	0.0431999999999988
88	main-effect	BS	0	153	0.0464000000000002
89	main-effect	BS	0	161	0.032
90	main-effect	BS	0	98	0.0272000000000006
91	main-effect	BS	0	99	0.0264000000000006
92	main-effect	BS	0	201	0.0264000000000024
93	main-effect	BS	0	187	0.0351999999999997
94	main-effect	BS	0	129	0.0367999999999995
95	main-effect	BS	0	191	0.0327999999999982
96	main-effect	BS	0	162	0.0512000000000015
97	main-effect	BS	0	151	0.0703999999999994
98	main-effect	BS	0	130	0.034399999999998
99	main-effect	BS	1	151	0.0703999999999994
100	main-effect	BS	0	91	0.02000000000001
101	main-effect	BS	0	190	0.0343999999999705
102	main-effect	BS	0	147	0.0352000000000015
103	main-effect	BS	0	138	0.041599999999999
104	main-effect	BS	0	145	0.0399999999999991
105	main-effect	BS	0	166	0.0528000000000013
106	main-effect	BS	0	165	0.0488
107	main-effect	BS	0	178	0.0360000000000014
108	main-effect	BS	0	209	0.0256000000000007
109	main-effect	BS	0	148	0.0592000000000006
110	main-effect	BS	0	88	0.0240000000000009
111	main-effect	BS	0	160	0.0496000000000016
112	main-effect	BS	0	168	0.0440000000000005
113	main-effect	BS	0	146	0.0399999999999991
114	main-effect	BS	0	86	0.0272000000000006
115	main-effect	BS	0	155	0.0567999999999991
116	main-effect	BS	0	142	0.0511999999999979
117	main-effect	BS	1	99	0.0255999999999972
118	main-effect	BS	0	181	0.036
119	main-effect	BS	0	155	0.0608000000000302
120	main-effect	BS	0	217	0.0255999999999892
121	main-effect	BS	0	102	0.0319999999999805
122	main-effect	BS	0	152	0.0367999999999995
123	main-effect	BS	1	133	0.036
124	main-effect	BS	1	157	0.0567999999999991
125	main-effect	BS	1	154	0.0703999999999994
126	main-effect	GD	0	172	0.0455999999999899
127	main-effect	GD	0	156	0.0359999999999996
128	main-effect	GD	0	167	0.0271999999999899
129	main-effect	GD	0	171	0.0351999999999997
130	main-effect	GD	0	159	0.0328000000000106
131	main-effect	GD	0	105	0.0368000000000004
132	main-effect	GD	0	171	0.0327999999999893
133	main-effect	GD	0	80	0.0231999999999992
134	main-effect	GD	0	160	0.0360000000000014
135	main-effect	GD	0	159	0.0512000000000015
136	main-effect	GD	0	149	0.0616000000000021
137	main-effect	GD	0	169	0.0408000000000008
138	main-effect	GD	0	168	0.0400000000000027
139	main-effect	GD	1	180	0.0344000000000015
140	main-effect	GD	0	122	0.0375999999999999
141	main-effect	GD	0	157	0.0455999999999968
142	main-effect	GD	0	133	0.0215999999999994
143	main-effect	GD	0	174	0.0288000000000004
144	main-effect	GD	0	86	0.0215999999999994
145	main-effect	GD	0	169	0.0440000000000005
146	main-effect	GD	0	214	0.0240000000000009
147	main-effect	GD	0	107	0.0264000000000024
148	main-effect	GD	0	138	0.0304000000000002
149	main-effect	GD	0	174	0.0231999999999992
150	main-effect	GD	0	176	0.0495999999999981
151	main-effect	GD	0	122	0.0231999999999992
152	main-effect	GD	0	174	0.0304000000000397
153	main-effect	GD	0	159	0.0448000000000093
154	main-effect	GD	0	101	0.0239999999999991
155	main-effect	GD	0	146	0.0607999999999986
156	main-effect	GD	0	103	0.0263999999999989
157	main-effect	GD	0	165	0.0472000000000001
158	main-effect	GD	0	175	0.024799999999999
159	main-effect	GD	0	178	0.0384000000001024
160	main-effect	GD	0	155	0.0600000000000103
161	main-effect	GD	0	208	0.02639999999999
162	main-effect	GD	0	89	0.0272000000000006
163	main-effect	GD	0	184	0.0368000000000013
164	main-effect	GD	0	123	0.036000000000001
165	main-effect	GD	0	168	0.0448000000000099
166	main-effect	GD	0	80	0.0343999999999998
167	main-effect	GD	0	88	0.0279999999999898
168	main-effect	GD	0	90	0.02640000000003
169	main-effect	GD	0	88	0.0231999999999749
170	main-effect	GD	0	145	0.0504000000000281
171	main-effect	GD	0	104	0.0248000000000008
172	main-effect	GD	0	172	0.0599999999999987
173	main-effect	GD	0	169	0.0488
174	main-effect	GD	0	160	0.0608000000000004
175	main-effect	GD	0	216	0.0264000000000024
176	main-effect	GD	0	90	0.0208000000000013
177	main-effect	GD	0	169	0.0472000000000001
178	main-effect	GD	0	169	0.0472000000000001
179	main-effect	GD	1	148	0.0576000000000008
180	main-effect	GD	0	190	0.0319999999999998
181	main-effect	GD	0	159	0.0384000000000104
182	main-effect	GD	0	135	0.0839999999999996
183	main-effect	GD	0	192	0.0248000000000008
184	main-effect	GD	0	81	0.0239999999999991
185	main-effect	GD	0	180	0.0376000000000012
186	main-effect	GD	0	190	0.032
187	main-effect	GD	0	114	0.0335999999999999
188	main-effect	GD	0	97	0.0231999999999992
189	main-effect	GD	0	135	0.0231999999999992
190	main-effect	GD	0	113	0.0344000000000015
191	main-effect	GD	0	143	0.0391999999999975
192	main-effect	GD	0	155	0.0423999999999971
193	main-effect	GD	0	91	0.0295999999999985
194	main-effect	GD	0	152	0.0215999999999994
195	main-effect	GD	0	173	0.046400000000002
196	main-effect	GD	0	95	0.0215999999999994
197	main-effect	GD	0	142	0.0352000000000032
198	main-effect	GD	0	171	0.0440000000000005
199	main-effect	GD	0	196	0.0295999999999985
200	main-effect	GD	1	148	0.0407999999999902
201	main-effect	GD	0	146	0.0367999999999693
202	main-effect	GD	0	163	0.0344000000000007
203	main-effect	GD	0	136	0.0863999999999701
204	main-effect	GD	0	178	0.0368000000000297
205	main-effect	GD	0	218	0.0232000000000028
206	main-effect	GD	0	184	0.032
207	main-effect	GD	0	126	0.0335999999999999
208	main-effect	GD	0	102	0.0272000000000006
209	main-effect	GD	0	87	0.0215999999999994
210	main-effect	GD	0	182	0.0368000000000031
211	main-effect	GD	0	107	0.0399999999999991
212	main-effect	GD	1	108	0.0215999999999994
213	main-effect	PT	0	136	0.04640000000001
214	main-effect	PT	0	150	0.0247999999999999
215	main-effect	PT	0	126	0.0312000000000001
216	main-effect	PT	0	146	0.0375999999999994
217	main-effect	PT	0	164	0.0640000000000001
218	main-effect	PT	0	171	0.0367999999999995
219	main-effect	PT	0	133	0.0279999999999987
220	main-effect	PT	0	164	0.0399999999999991
221	main-effect	PT	1	133	0.0304
222	main-effect	PT	1	197	0.0367999999999995
223	main-effect	PT	1	173	0.0495999999999999
224	main-effect	PT	1	195	0.0231999999999992
225	main-effect	PT	1	142	0.039200000000001
226	main-effect	PT	1	171	0.0407999999999973
227	main-effect	PT	0	168	0.0519999999999998
228	main-effect	PT	0	238	0.0216000000000101
229	main-effect	PT	0	168	0.0439999999999898
230	main-effect	PT	0	231	0.024
231	main-effect	PT	0	176	0.0432000000000095
232	main-effect	PT	0	192	0.0327999999999999
233	main-effect	PT	0	150	0.032
234	main-effect	PT	0	153	0.0280000000000005
235	main-effect	PT	0	181	0.0488
236	main-effect	PT	0	164	0.0295999999999985
237	main-effect	PT	0	169	0.0328000000000017
238	main-effect	PT	0	167	0.0519999999999996
239	main-effect	PT	1	156	0.107199999999999
240	main-effect	PT	1	150	0.0528000000000013
241	main-effect	PT	0	176	0.0295999999999599
242	main-effect	PT	0	168	0.0400000000000196
243	main-effect	PT	0	211	0.0288000000000004
244	main-effect	PT	0	171	0.0511999999999997
245	main-effect	PT	0	168	0.0488
246	main-effect	PT	0	127	0.0288000000000004
247	main-effect	PT	0	197	0.0231999999999992
248	main-effect	PT	0	174	0.0399999999999991
249	main-effect	PT	0	162	0.0424000000000007
250	main-effect	PT	0	160	0.0543999999999976
251	main-effect	PT	0	135	0.0327999999998987
252	main-effect	PT	0	141	0.0360000000000014
253	main-effect	PT	0	190	0.0383999999999993
254	main-effect	PT	0	199	0.0304000000000002
255	main-effect	PT	1	134	0.0767999999999915
256	main-effect	PT	1	170	0.0391999999999895
257	main-effect	PT	1	223	0.02240000000001
258	main-effect	PT	1	152	0.0456000000000394
259	main-effect	PT	1	177	0.0640000000000285
260	main-effect	PT	1	142	0.0695999999999799
261	main-effect	PT	1	143	0.041599999999999
262	main-effect	PT	1	130	0.0296000000000021
263	main-effect	PT	0	167	0.0464000000000002
264	main-effect	PT	0	219	0.0232000000000001
265	main-effect	PT	0	177	0.0591999999999997
266	main-effect	PT	0	159	0.0312000000000001
267	main-effect	PT	0	206	0.0288000000000004
268	main-effect	PT	0	171	0.0568000000000008
269	main-effect	PT	0	188	0.0448000000000004
270	main-effect	PT	0	148	0.0519999999999996
271	main-effect	PT	0	179	0.0391999999999992
272	main-effect	PT	0	156	0.0375999999999976
273	main-effect	PT	0	149	0.0951999999999984
274	main-effect	PT	0	192	0.032
275	main-effect	PT	0	109	0.024799999999999
276	main-effect	PT	1	154	0.0655999999999999
277	main-effect	PT	1	151	0.046400000000002
278	main-effect	PT	0	153	0.075199999999995
279	main-effect	PT	0	163	0.0600000000000019
280	main-effect	PT	0	149	0.0608
281	main-effect	PT	0	150	0.0256000000000203
282	main-effect	PT	0	151	0.0207999999999799
283	main-effect	PT	0	180	0.0455999999999985
284	main-effect	PT	0	161	0.032
285	main-effect	PT	0	102	0.0199999999999996
286	main-effect	PT	0	111	0.0280000000000022
287	main-effect	PT	0	174	0.0472000000000001
288	main-effect	PT	0	176	0.0424000000000007
289	main-effect	PT	0	159	0.0648000000000017
290	main-effect	PT	0	181	0.0400000000000027
291	main-effect	PT	1	170	0.0208000000000013
292	main-effect	PT	1	175	0.0416000000000025
293	main-effect	PT	1	133	0.0304000000000002
294	main-effect	PT	1	188	0.0376000000000012
295	main-effect	PT	0	152	0.054400000000001
296	main-effect	PT	0	154	0.058399999999999
297	main-effect	PT	0	158	0.064
298	main-effect	PT	0	169	0.0376000000000001
299	main-effect	PT	0	169	0.0448000000000002
300	main-effect	PT	0	180	0.0391999999999899
301	main-effect	PT	0	152	0.0327999999999999
302	main-effect	PT	0	165	0.036
303	main-effect	PT	0	172	0.0407999999999999
304	main-effect	PT	0	114	0.0232000000000001
305	main-effect	PT	0	137	0.025599999999999
306	main-effect	PT	0	129	0.0376000000000012
307	main-effect	PT	0	163	0.0223999999999993
308	main-effect	PT	0	156	0.0447999999999986
309	main-effect	PT	0	171	0.041599999999999
310	main-effect	PT	0	165	0.0488
311	main-effect	PT	0	176	0.0472000000000001
312	main-effect	PT	0	109	0.0263999999999989
313	main-effect	PT	0	150	0.0535999999999994
314	main-effect	PT	0	153	0.0384000000000029
315	main-effect	PT	0	187	0.0351999999999997
316	main-effect	PT	0	144	0.0327999999999982
317	main-effect	PT	0	183	0.0224000000000011
318	main-effect	PT	0	161	0.0503999999999998
319	main-effect	PT	1	159	0.0344000000000015
320	main-effect	PT	0	207	0.029599999999988
321	main-effect	PT	0	157	0.0568000000000097
322	main-effect	PT	0	150	0.0352000000000006
323	main-effect	PT	0	173	0.0207999999999799
324	main-effect	PT	0	129	0.0231999999999992
325	main-effect	PT	0	142	0.0304000000000002
326	main-effect	PT	0	189	0.0408000000000008
327	main-effect	PT	0	170	0.0503999999999998
328	main-effect	PT	1	153	0.0456000000000003
329	main-effect	PT	1	152	0.0375999999999994
330	main-effect	BT	0	161	0.048
331	main-effect	BT	0	151	0.0248000000000026
332	main-effect	BT	0	131	0.0335999999999999
333	main-effect	BT	0	160	0.0448000000000022
334	main-effect	BT	0	159	0.0320000000000107
335	main-effect	BT	0	149	0.0431999999999899
336	main-effect	BT	0	219	0.024
337	main-effect	BT	0	170	0.0335999999999999
338	main-effect	BT	0	188	0.0248000000000026
339	main-effect	BT	0	142	0.0288000000000497
340	main-effect	BT	0	159	0.024
341	main-effect	BT	0	119	0.0304000000000002
342	main-effect	OS	0	158	0.0352000000000001
343	main-effect	OS	0	186	0.0287999999999999
344	main-effect	OS	0	132	0.024
345	main-effect	OS	0	115	0.0247999999999999
346	main-effect	OS	0	152	0.0376000000000003
347	main-effect	OS	0	175	0.0504000000000016
348	main-effect	OS	0	200	0.0279999999999987
349	main-effect	OS	0	135	0.0472000000000001
350	main-effect	OS	0	152	0.0351999999999997
351	main-effect	OS	0	156	0.0448000000000004
352	main-effect	OS	0	151	0.0583999999999989
353	main-effect	OS	0	129	0.0288000000000199
354	main-effect	OS	0	172	0.0336000000000098
355	main-effect	OS	0	184	0.0352000000000103
356	main-effect	OS	0	133	0.0335999999999999
357	main-effect	OS	0	123	0.0280000000000005
358	main-effect	OS	0	130	0.0335999999999999
359	main-effect	OS	0	157	0.0359999999999996
360	main-effect	OS	0	161	0.034399999999998
361	main-effect	OS	0	173	0.0496000000000016
362	main-effect	OS	0	97	0.0231999999999992
363	main-effect	OS	0	99	0.0255999999999972
364	main-effect	OS	0	186	0.0327999999999982
365	main-effect	OS	0	102	0.0215999999999994
366	main-effect	OS	0	156	0.0696000000000012
367	main-effect	OS	0	179	0.0368000000000031
368	main-effect	OS	0	226	0.0271999999999899
369	main-effect	OS	0	104	0.0215999999999994
370	main-effect	OS	0	158	0.0391999999999992
371	main-effect	OS	0	186	0.034399999999998
372	main-effect	OS	0	128	0.0264000000000024
373	main-effect	OS	0	179	0.036800000000028
374	main-effect	OS	0	165	0.0439999999999821
375	main-effect	OS	0	156	0.057600000000033
376	main-effect	OS	0	173	0.0424000000000402
377	main-effect	OS	0	81	0.0208000000000013
378	main-effect	OS	0	179	0.0256000000000007
379	main-effect	OS	0	144	0.0224000000000011
380	main-effect	OS	0	208	0.0279999999999987
381	main-effect	OS	0	144	0.0224000000000011
382	main-effect	OS	0	122	0.050399999999968
383	main-effect	OS	0	212	0.027199999999994
384	main-effect	OS	0	177	0.0263999999999696
385	main-effect	OS	0	110	0.0223999999999993
386	main-effect	OS	0	107	0.0208000000001007
387	main-effect	OS	0	141	0.0200000000000014
388	main-effect	OS	0	124	0.0256000000000007
389	main-effect	OS	0	163	0.0447999999999986
390	main-effect	OS	0	180	0.0399999999999991
391	main-effect	OS	0	156	0.0440000000000005
392	main-effect	OS	0	130	0.0319999999999006
393	main-effect	OS	0	139	0.034399999999998
394	main-effect	OS	0	132	0.032
395	main-effect	OS	0	190	0.0431999999999988
396	main-effect	OS	1	160	0.0312000000000099
397	main-effect	OS	0	101	0.0215999999999994
398	main-effect	OS	0	80	0.0248000000000008
399	main-effect	OS	0	116	0.0295999999999985
400	main-effect	OS	0	175	0.048
401	main-effect	OS	0	140	0.0351999999999997
402	main-effect	OS	0	111	0.0304000000000002
403	main-effect	OS	0	173	0.0408000000000008
404	main-effect	OS	0	95	0.0256000000000007
405	main-effect	OS	0	166	0.0367999999999995
406	main-effect	OS	0	162	0.0528000000000013
407	main-effect	OS	0	225	0.024799999999999
408	main-effect	OS	0	158	0.0527999999999902
409	main-effect	OS	0	174	0.0432000000000095
410	main-effect	OS	0	157	0.0367999999999693
411	main-effect	OS	0	145	0.0480000000000018
412	main-effect	OS	1	95	0.0207999999999506
413	main-effect	OS	0	226	0.0223999999999975
414	main-effect	OS	0	140	0.0264000000000006
415	main-effect	OS	0	103	0.0224000000000011
416	main-effect	OS	0	110	0.0328000000000017
417	main-effect	OS	0	161	0.0351999999999997
418	main-effect	OS	0	122	0.0216000000000349
419	main-effect	OS	0	120	0.02640000000002
420	main-effect	OS	0	94	0.02239999999995
421	main-effect	OS	0	150	0.0608000000000297
422	main-effect	OS	0	161	0.0319999999999903
423	main-effect	OS	0	157	0.0568000000000008
424	main-effect	OS	0	154	0.0391999999999992
425	main-effect	OS	0	167	0.0351999999999997
426	main-effect	OS	0	165	0.0456000000000003
427	main-effect	OS	0	127	0.021600000000003
428	main-effect	OS	0	188	0.0304000000000002
429	main-effect	OS	0	130	0.0255999999999972
430	main-effect	OS	0	193	0.0255999999999972
431	main-effect	OS	0	177	0.0399999999999991
432	main-effect	OS	0	156	0.0312000000000019
433	main-effect	OS	0	157	0.0607999999999969
434	main-effect	OS	0	167	0.0479999999999996
435	main-effect	OS	0	125	0.0439999999999898
436	main-effect	OS	0	86	0.0256000000000007
437	main-effect	OS	0	170	0.0392000000001005
438	main-effect	OS	0	132	0.0328000000000976
439	main-effect	OS	0	158	0.0536000000000989
440	main-effect	OS	0	94	0.0247999999998996
441	main-effect	OS	0	123	0.0256000000000007
442	main-effect	OS	0	107	0.034399999999998
443	main-effect	OS	0	154	0.0255999999999013
444	main-effect	OS	0	146	0.034399999999998
445	main-effect	OS	0	141	0.0223999999999016
446	main-effect	BD	0	195	0.0296000000000001
447	main-effect	BD	0	94	0.0215999999999998
448	main-effect	BD	0	124	0.0264
449	main-effect	BD	0	140	0.04
450	main-effect	BD	0	167	0.0472000000000001
451	main-effect	BD	0	159	0.0391999999999992
452	main-effect	BD	0	155	0.0584000000000007
453	main-effect	BD	0	128	0.0416000000000007
454	main-effect	BD	0	129	0.0208000000000013
455	main-effect	BD	0	196	0.0295999999999985
456	main-effect	BD	0	157	0.0351999999999997
457	main-effect	BD	0	141	0.0375999999999976
458	main-effect	BD	0	101	0.0231999999999992
459	main-effect	BD	0	141	0.0311999999999983
460	main-effect	BD	0	173	0.0408000000000008
461	main-effect	BD	0	152	0.0648000000000017
462	main-effect	BD	0	80	0.0256000000000007
463	main-effect	BD	0	92	0.0215999999999994
464	main-effect	BD	0	169	0.024799999999999
465	main-effect	BD	0	164	0.0495999999999981
466	main-effect	BD	0	147	0.0447999999999986
467	main-effect	BD	0	80	0.0232000000000028
468	main-effect	BD	0	107	0.0264000000000104
469	main-effect	BD	0	157	0.0311999999999983
470	main-effect	BD	1	136	0.0408000000000008
471	main-effect	BD	0	184	0.0471999999999797
472	main-effect	BD	0	177	0.0439999999999801
473	main-effect	BD	0	149	0.0735999999999999
474	main-effect	BD	0	99	0.0304000000000002
475	main-effect	BD	0	171	0.0424000000000007
476	main-effect	BD	0	177	0.039200000000001
477	main-effect	BD	0	171	0.0432000000000023
478	main-effect	BD	0	159	0.0304000000000002
479	main-effect	BD	0	189	0.0327999999999982
480	main-effect	BD	0	107	0.032
481	main-effect	BD	1	162	0.0488
482	main-effect	BD	1	133	0.032
483	main-effect	BD	1	80	0.0304000000000002
484	main-effect	BD	0	133	0.059199999999976
485	main-effect	BD	0	132	0.03600000000001
486	main-effect	BD	0	107	0.0248000000000201
487	main-effect	BD	0	150	0.04000000000002
488	main-effect	BD	0	140	0.0872000000000002
489	main-effect	BD	0	106	0.0432000000000099
490	main-effect	BD	0	164	0.0495999999999901
491	main-effect	BD	0	212	0.024
492	main-effect	BD	0	83	0.0232000000000303
493	main-effect	BD	0	150	0.0695999999999799
494	main-effect	BD	0	156	0.04239999999999
495	main-effect	BD	0	145	0.073599999999999
496	main-effect	BD	0	139	0.0703999999999994
497	main-effect	BD	0	175	0.023200000000001
498	main-effect	BD	0	127	0.0311999999999983
499	main-effect	BD	0	142	0.0535999999999994
500	main-effect	BD	0	166	0.0335999999999999
501	main-effect	BD	0	105	0.0295999999999026
502	main-effect	BD	1	144	0.0656000000000017
503	main-effect	BD	1	168	0.0295999999999985
504	main-effect	BD	1	167	0.0616000000000021
505	main-effect	BD	0	134	0.0528
506	main-effect	BD	0	92	0.032
507	main-effect	BD	0	169	0.0416000000000007
508	main-effect	BD	0	143	0.0663999999999998
509	main-effect	BD	0	151	0.0343999999999998
510	main-effect	BD	0	103	0.0288000000000004
511	main-effect	BD	0	94	0.0248000000000008
512	main-effect	BD	0	225	0.0224000000000011
513	main-effect	BD	0	164	0.0272000000000006
514	main-effect	BD	0	150	0.0688000000000031
515	main-effect	BD	0	135	0.0272000000000006
516	main-effect	BD	0	130	0.0288000000000004
517	main-effect	BD	0	156	0.0343999999999998
518	main-effect	BD	0	176	0.0207999999999995
519	main-effect	BD	0	135	0.0352000000000015
520	main-effect	BD	0	169	0.0511999999999997
521	main-effect	BD	0	118	0.0367999999999995
522	main-effect	BD	0	194	0.0328000000000017
523	main-effect	BD	0	97	0.0384000000000029
524	main-effect	BD	0	160	0.0631999999999984
525	main-effect	BD	0	159	0.0648000000000017
526	main-effect	BD	0	133	0.0295999999999985
527	main-effect	BD	1	95	0.0287999999999986
528	main-effect	BD	0	128	0.13840000000002
529	main-effect	BD	0	149	0.0615999999999897
530	main-effect	BD	0	165	0.0551999999999797
531	main-effect	BD	0	163	0.0552000000000099
532	main-effect	BD	0	134	0.0312000000000019
533	main-effect	BD	0	155	0.0472000000000001
534	main-effect	BD	0	134	0.066399999999998
535	main-effect	BD	1	161	0.0567999999999991
536	main-effect	BD	1	118	0.0240000000000009
537	main-effect	BD	0	162	0.031200000000013
538	main-effect	BD	0	133	0.0416000000000194
539	main-effect	BD	0	128	0.0264000000000202
540	main-effect	BD	0	153	0.0472000000000286
541	main-effect	BD	0	183	0.0360000000000014
542	main-effect	BD	0	152	0.0351999999999997
543	main-effect	BD	0	176	0.0456000000000003
544	main-effect	BD	0	131	0.0328000000000017
545	main-effect	BD	0	176	0.037599999999998
546	main-effect	BD	0	181	0.0360000000000098
547	main-effect	BD	0	155	0.0600000000000005
548	main-effect	BD	0	180	0.0288000000000004
549	main-effect	BD	0	171	0.0424000000000007
550	main-effect	BD	1	169	0.0304000000000002
551	main-effect	BD	0	113	0.0223999999999993
552	main-effect	BD	0	138	0.0312000000000001
553	main-effect	BD	0	150	0.0672000000000006
554	main-effect	BD	0	150	0.0520000000000005
555	main-effect	BD	0	132	0.0304000000000002
556	main-effect	BD	0	135	0.0983999999999998
557	main-effect	BD	0	143	0.072000000000001
558	main-effect	BD	0	153	0.0616000000000003
559	main-effect	BD	0	157	0.0543999999999993
560	main-effect	BD	0	143	0.0808
561	main-effect	BD	1	144	0.053600000000003
562	main-effect	BD	1	157	0.0583999999999989
563	main-effect	BD	1	160	0.0359999999999978
564	main-effect	BD	1	106	0.0352000000000032
565	main-effect	BD	1	137	0.0240000000000009
566	main-effect	BD	1	164	0.0648000000000017
567	main-effect	BD	0	80	0.0311999999999999
568	main-effect	BD	0	159	0.048
569	main-effect	BD	0	139	0.0720000000000001
570	main-effect	BD	0	168	0.0447999999999897
571	main-effect	BD	0	192	0.0336000000000007
572	main-effect	BD	0	131	0.025599999999999
573	main-effect	BD	0	177	0.0391999999999992
574	main-effect	BD	0	143	0.0335999999999999
575	main-effect	BD	0	135	0.0311999999999983
576	main-effect	BD	1	148	0.0815999999999799
577	main-effect	BD	1	88	0.0232000000000001
578	main-effect	BD	1	126	0.0271999999999899
579	main-effect	BD	1	150	0.0448000000000004
580	main-effect	BD	1	179	0.0408000000000008
581	main-effect	BD	1	129	0.0256000000000007
582	main-effect	BD	1	168	0.0472000000000001
583	main-effect	BD	1	123	0.0495999999999981
584	main-effect	BD	1	136	0.0272000000000006
585	main-effect	BD	1	148	0.0360000000000014
586	main-effect	BD	0	143	0.0615999999999994
587	main-effect	BD	0	98	0.02640000000003
588	main-effect	BD	0	157	0.05200000000002
589	main-effect	BD	0	157	0.031200000000009
590	main-effect	BD	0	134	0.0359999999999996
591	main-effect	BD	0	163	0.0288000000000004
592	main-effect	BD	0	150	0.0592000000000006
593	main-effect	BD	0	202	0.0288000000000004
594	main-effect	BD	0	176	0.0399999999999991
595	main-effect	BD	0	121	0.0232000000000028
596	main-effect	BD	0	177	0.0432000000000023
597	main-effect	BD	1	209	0.02640000000003
598	main-effect	BD	1	109	0.0344000000000015
599	main-effect	BD	1	172	0.0631999999999984
600	main-effect	BD	1	153	0.0528000000000013
601	main-effect	BD	1	164	0.0624000000000002
602	main-effect	BD	1	147	0.0583999999999989
603	main-effect	BD	0	139	0.055999999999983
604	main-effect	BD	0	147	0.0527999999999906
605	main-effect	BD	0	155	0.0432000000000006
606	main-effect	BD	0	109	0.0359999999999996
607	main-effect	BD	0	155	0.0640000000000001
608	main-effect	BD	0	158	0.0359999999999978
609	main-effect	BD	0	104	0.0272000000000006
610	main-effect	BD	0	151	0.0431999999999988
611	main-effect	BD	0	92	0.0215999999999994
612	main-effect	BD	0	150	0.0728000000000009
613	main-effect	BD	0	141	0.0792000000000002
614	main-effect	BD	0	177	0.0440000000000005
615	main-effect	BD	0	128	0.0351999999999997
616	main-effect	BD	1	80	0.0288000000000004
617	main-effect	BD	0	121	0.0576
618	main-effect	BD	0	157	0.0496000000000003
619	main-effect	BD	0	154	0.0600000000000001
620	main-effect	BD	0	166	0.0271999999999997
621	main-effect	BD	0	196	0.0304000000000002
622	main-effect	BD	0	142	0.0912000000000006
623	main-effect	BD	0	103	0.0224000000000011
624	main-effect	BD	0	182	0.0376000000000012
625	main-effect	BD	0	160	0.0343999999999998
626	main-effect	BD	0	141	0.0663999999999998
627	main-effect	BD	0	163	0.0263999999999989
628	main-effect	BD	0	127	0.0391999999999992
629	main-effect	BD	0	97	0.0248000000000026
630	main-effect	BD	0	151	0.0535999999999994
631	main-effect	BD	0	182	0.0263999999999989
632	main-effect	BD	0	184	0.0344000000000015
633	main-effect	BD	0	148	0.0512000000000015
634	main-effect	BD	1	131	0.0207999999999995
635	main-effect	BD	0	134	0.0240000000000009
636	main-effect	BD	0	129	0.0279999999999987
637	main-effect	BD	0	167	0.0463999999999984
638	main-effect	BD	0	154	0.0456000000000003
639	main-effect	BD	0	187	0.0359999999999978
640	main-effect	BD	0	127	0.024799999999999
641	main-effect	BD	1	162	0.0407999999999902
642	main-effect	BD	1	200	0.0295999999999905
643	main-effect	BD	1	155	0.0368000000000004
644	main-effect	BD	1	140	0.11760000000001
645	main-effect	BD	1	163	0.0527999999999995
646	main-effect	BD	1	147	0.0416000000000007
647	main-effect	BD	1	96	0.0223999999999993
648	main-effect	BD	0	170	0.0415999999999803
649	main-effect	BD	0	99	0.0223999999999993
650	main-effect	BD	0	112	0.0351999999999997
651	main-effect	BD	0	109	0.0208000000000013
652	main-effect	BD	0	141	0.0783999999999985
653	main-effect	BD	1	160	0.0456000000000003
654	main-effect	BD	1	164	0.0511999999999979
655	main-effect	BD	1	156	0.0583999999999989
656	main-effect	BD	0	164	0.0552000000000099
657	main-effect	BD	0	113	0.0231999999999992
658	main-effect	BD	0	172	0.0223999999999998
659	main-effect	BD	0	163	0.0512000000000001
660	main-effect	BD	0	94	0.0255999999999998
661	main-effect	BD	0	178	0.0392000000000001
662	main-effect	BD	0	126	0.0400000000000205
663	main-effect	BD	0	182	0.03839999999997
664	main-effect	BD	0	151	0.0544000000000011
665	main-effect	BD	0	105	0.0272000000000006
666	main-effect	BD	0	100	0.0311999999999983
667	main-effect	BD	0	160	0.041599999999999
668	main-effect	BD	0	203	0.0272000000000006
669	main-effect	BD	0	185	0.0223999999999975
670	main-effect	BD	0	193	0.0295999999999985
671	main-effect	BD	0	165	0.0488
672	main-effect	BD	0	87	0.0199999999999996
673	main-effect	BD	0	194	0.0304000000000002
674	main-effect	BD	0	163	0.0503999999999998
675	main-effect	BD	1	154	0.0472000000000001
676	main-effect	BD	1	155	0.0719999999999992
677	main-effect	BD	0	143	0.0768
678	main-effect	BD	0	179	0.0231999999999997
679	main-effect	BD	0	168	0.0527999999999995
680	main-effect	BD	0	127	0.0999999999999996
681	main-effect	BD	0	150	0.0640000000000001
682	main-effect	BD	0	196	0.0296000000000003
683	main-effect	BD	0	131	0.1168
684	main-effect	BD	0	87	0.0351999999999997
685	main-effect	BD	0	168	0.0456000000000003
686	main-effect	BD	0	80	0.0296000000000021
687	main-effect	BD	1	139	0.0944000000000003
688	main-effect	BD	1	146	0.0599999999999987
689	main-effect	BD	1	152	0.0431999999999988
690	main-effect	BD	1	163	0.0472000000000001
691	main-effect	BD	1	156	0.034399999999998
692	main-effect	BD	1	131	0.0224000000000011
693	main-effect	BD	0	135	0.031199999999998
694	main-effect	BD	0	158	0.0639999999999996
695	main-effect	BD	0	160	0.0311999999999903
696	main-effect	BD	0	101	0.0247999999999999
697	main-effect	BD	0	141	0.024
698	main-effect	BD	0	152	0.0392000000000099
699	main-effect	BD	0	174	0.03840000000001
700	main-effect	BD	0	145	0.0464000000000002
701	main-effect	BD	0	150	0.0319999999999911
702	main-effect	BD	0	92	0.0207999999999906
703	main-effect	BD	0	80	0.0248000000000008
704	main-effect	BD	0	161	0.039200000000001
705	main-effect	BD	0	138	0.0696000000000012
706	main-effect	BD	0	90	0.0208000000000013
707	main-effect	BD	0	154	0.0367999999999995
708	main-effect	BD	0	168	0.0456000000000003
709	main-effect	BD	1	173	0.02639999999999
710	main-effect	BD	0	179	0.0391999999999939
711	main-effect	BD	0	170	0.045600000000008
712	main-effect	BD	0	126	0.0367999999999999
713	main-effect	BD	0	143	0.052
714	main-effect	BD	0	149	0.0879999999999903
715	main-effect	BD	0	125	0.024
716	main-effect	BD	0	143	0.0655999999999901
717	main-effect	BD	0	155	0.0655999999999999
718	main-effect	BD	0	165	0.0551999999999992
719	main-effect	BD	0	155	0.0543999999999993
720	main-effect	BD	0	162	0.0663999999999998
721	main-effect	BD	0	138	0.0431999999999988
722	main-effect	BD	0	135	0.0351999999999997
723	main-effect	BD	0	145	0.0823999999999998
724	main-effect	BD	0	102	0.032
725	main-effect	BD	0	143	0.0224000000000011
726	main-effect	BD	0	132	0.0272000000000006
727	main-effect	BD	0	111	0.0240000000000009
728	main-effect	BD	0	100	0.0272000000000006
729	main-effect	BD	0	164	0.0272000000000006
730	main-effect	BD	0	167	0.0479999999999983
731	main-effect	BD	0	155	0.0728000000000009
732	main-effect	BD	0	143	0.0896000000000008
733	main-effect	BD	1	171	0.04479999999998
734	main-effect	BD	1	171	0.0431999999999988
735	main-effect	BD	1	151	0.0776000000000003
736	main-effect	BD	1	153	0.0343999999999998
737	main-effect	BD	1	150	0.0367999999999995
738	main-effect	BR	0	160	0.0568000000000097
739	main-effect	BR	0	163	0.0527999999999902
740	main-effect	BR	0	164	0.0224000000000002
741	main-effect	BR	0	154	0.04239999999999
742	main-effect	BR	0	134	0.02639999999999
743	main-effect	BR	0	104	0.0327999999999804
744	main-effect	BR	0	146	0.0367999999999995
745	main-effect	BR	0	104	0.0215999999999994
746	main-effect	BR	0	185	0.0408000000000008
747	main-effect	BR	0	164	0.0408000000000008
748	main-effect	BR	0	109	0.0256000000000007
749	main-effect	BR	0	188	0.0408000000000001
750	main-effect	BR	0	121	0.024
751	main-effect	BR	0	155	0.0327999999999999
752	main-effect	BR	0	162	0.044
753	main-effect	BR	0	164	0.0311999999999997
754	main-effect	BR	0	172	0.0288000000000004
755	main-effect	BR	0	179	0.0360000000000014
756	main-effect	BR	0	176	0.0383999999999993
757	main-effect	BR	0	208	0.0264000000000006
758	main-effect	BR	0	174	0.0447999999999986
759	main-effect	BR	0	115	0.0240000000000009
760	main-effect	BR	0	188	0.0264000000000024
761	main-effect	BR	0	161	0.0568000000000026
762	main-effect	BR	0	205	0.0311999999999983
763	main-effect	BR	0	139	0.0312
764	main-effect	BR	0	146	0.0535999999999999
765	main-effect	BR	0	144	0.0744000000000007
766	main-effect	BR	0	169	0.0247999999999999
767	main-effect	BR	0	149	0.0640000000000001
768	main-effect	BR	0	148	0.0920000000000005
769	main-effect	BR	0	193	0.0296000000000003
770	main-effect	BR	0	197	0.0312000000000019
771	main-effect	BR	0	171	0.0480000000000018
772	main-effect	BR	0	170	0.036000000000001
773	main-effect	BR	0	157	0.0408000000000008
774	main-effect	BR	0	155	0.0607999999999986
775	main-effect	BR	0	94	0.0208000000000013
776	main-effect	BR	0	170	0.0327999999999982
777	main-effect	BR	0	149	0.0504000000000033
778	main-effect	BR	0	160	0.0207999999999977
779	main-effect	BR	0	155	0.032
780	main-effect	BR	0	137	0.0248000000000026
781	main-effect	BR	0	238	0.0208000000000013
782	main-effect	BR	0	138	0.0351999999999997
783	main-effect	BR	1	179	0.0391999999999992
784	main-effect	BR	0	166	0.0472000000000299
785	main-effect	BR	0	169	0.0536000000000207
786	main-effect	BR	0	162	0.0472000000000001
787	main-effect	BR	0	155	0.0560000000000009
788	main-effect	BR	0	126	0.0391999999999975
789	main-effect	BR	0	131	0.0208000000000013
790	main-effect	BR	0	179	0.0391999999999975
791	main-effect	BR	0	117	0.0223999999999975
792	main-effect	BR	0	169	0.0360000000000014
793	main-effect	TL	0	84	0.0239999999999973
794	main-effect	TL	0	95	0.0272
795	main-effect	TL	0	189	0.0336000000000001
796	main-effect	TL	0	157	0.0295999999999998
797	main-effect	TL	0	80	0.0256000000000001
798	main-effect	TL	0	102	0.02
799	main-effect	TL	0	165	0.0247999999999999
800	main-effect	TL	0	169	0.0488000000000008
801	main-effect	TL	0	113	0.0255999999999998
802	main-effect	TL	0	156	0.0304000000000002
803	main-effect	TL	0	236	0.0256000000000007
804	main-effect	TL	0	160	0.0351999999999997
805	main-effect	TL	0	176	0.0431999999999988
806	main-effect	TL	0	122	0.0272000000000006
807	main-effect	TL	0	125	0.02240000000001
808	main-effect	TL	0	99	0.0304000000000002
809	main-effect	TL	0	132	0.0352000000000015
810	main-effect	TL	0	126	0.032
811	main-effect	TL	0	166	0.0440000000000005
812	main-effect	TL	0	122	0.0288000000000004
813	main-effect	TL	0	152	0.0448000000000004
814	main-effect	TL	0	223	0.0223999999999975
815	main-effect	TL	0	126	0.0263999999999989
816	main-effect	TL	0	104	0.0215999999999994
817	main-effect	TL	0	128	0.0296000000000021
818	main-effect	TL	0	148	0.0608000000000004
819	main-effect	TL	0	98	0.0223999999999975
820	main-effect	TL	0	133	0.0279999999999987
821	main-effect	TL	0	163	0.0440000000000005
822	main-effect	TL	0	218	0.0232000000000028
823	main-effect	TL	0	131	0.026400000000024
824	main-effect	TL	0	151	0.0376000000000003
825	main-effect	TL	0	180	0.0463999999999496
826	main-effect	TL	0	143	0.0304000000000402
827	main-effect	TL	0	165	0.0536000000000199
828	main-effect	TL	0	193	0.025599999999999
829	main-effect	TL	0	160	0.0216000000000012
830	main-effect	TL	0	168	0.0472000000000001
831	main-effect	TL	0	179	0.0400000000000027
832	main-effect	TL	0	160	0.0440000000000005
833	main-effect	TL	0	157	0.026400000000024
834	main-effect	TL	0	187	0.0295999999999603
835	main-effect	TL	0	106	0.0272000000000006
836	main-effect	TL	0	172	0.0207999999999497
837	main-effect	TL	0	190	0.0335999999999999
838	main-effect	TL	0	203	0.0239999999999974
839	main-effect	TL	0	163	0.0632000000000019
840	main-effect	TL	0	168	0.048000000000002
841	main-effect	TL	0	164	0.02640000000008
842	main-effect	TL	0	164	0.0568000000000699
843	main-effect	TL	0	126	0.0223999999998981
844	main-effect	TL	0	189	0.0320000000000995
845	main-effect	TL	0	119	0.0296000000000021
846	main-effect	TL	0	156	0.0216000000000989
847	main-effect	TL	0	105	0.0224000000001006
848	main-effect	TL	0	181	0.0344000000000015
849	main-effect	TL	0	161	0.0528000000000972
850	main-effect	TL	0	219	0.0255999999999399
851	main-effect	TL	0	108	0.02639999999997
852	main-effect	TL	0	165	0.02639999999997
853	main-effect	TL	0	172	0.03600000000006
854	main-effect	TL	0	80	0.0208000000000101
855	main-effect	TL	0	150	0.0647999999999902
856	main-effect	TL	0	111	0.0264000000000806
857	main-effect	TL	0	188	0.0335999999999803
858	main-effect	TL	0	139	0.0304000000000002
859	main-effect	TL	0	138	0.0528000000000013
860	main-effect	TL	0	205	0.0272000000000001
861	main-effect	TL	0	170	0.0367999999999995
862	main-effect	TL	0	129	0.024
863	main-effect	TL	0	142	0.0232000000000001
864	main-effect	TL	0	165	0.0335999999999999
865	main-effect	TL	0	182	0.0375999999999994
866	main-effect	TL	0	148	0.0288000000000004
867	main-effect	TL	0	168	0.0367999999999995
868	main-effect	TL	0	159	0.0448000000000022
869	main-effect	TL	0	133	0.0488
870	main-effect	TL	0	149	0.0456000000000003
871	main-effect	TL	0	101	0.0224000000000011
872	main-effect	TL	0	151	0.0375999999999976
873	main-effect	TL	0	139	0.0375999999999976
874	main-effect	TL	0	210	0.026399999999995
875	main-effect	TL	0	139	0.06640000000001
876	main-effect	TL	0	209	0.0304000000000202
877	main-effect	TL	0	127	0.02240000000001
878	main-effect	TL	0	164	0.0543999999999905
879	main-effect	TL	0	129	0.0312000000000019
880	main-effect	TL	0	109	0.0256000000000007
881	main-effect	TL	0	175	0.0335999999999999
882	main-effect	TL	0	132	0.024799999999999
883	main-effect	TL	0	211	0.0279999999999987
884	main-effect	TL	0	90	0.024000000000001
885	main-effect	TL	0	129	0.040799999999991
886	main-effect	TL	0	173	0.0199999999999996
887	main-effect	TL	0	146	0.0271999999999988
888	main-effect	TL	0	149	0.0351999999999997
889	main-effect	TL	0	165	0.0304000000000002
890	main-effect	TL	0	188	0.0383999999999993
891	main-effect	TL	0	163	0.0368000000000031
892	main-effect	TL	0	146	0.0215999999999994
893	main-effect	TL	0	80	0.024799999999999
894	main-effect	TL	0	160	0.0551999999999992
895	main-effect	TL	0	178	0.0416000000000025
896	main-effect	TL	0	148	0.0367999999999995
897	main-effect	TL	0	109	0.0367999999999995
898	main-effect	TL	0	203	0.0279999999999987
899	main-effect	TL	0	153	0.041599999999999
900	main-effect	TL	0	203	0.03199999999999
901	main-effect	TL	0	137	0.0312000000000099
902	main-effect	TL	0	148	0.0312000000000001
903	main-effect	TL	0	179	0.025599999999999
904	main-effect	TL	0	117	0.0207999999999995
905	main-effect	TL	0	91	0.0312000000000001
906	main-effect	TL	0	191	0.0335999999999999
907	main-effect	TL	0	222	0.0215999999999994
908	main-effect	TL	0	132	0.032
909	main-effect	TL	0	153	0.0256000000000007
910	main-effect	TL	0	156	0.0431999999999988
911	main-effect	TL	0	111	0.0288000000000004
912	main-effect	TL	0	150	0.0512000000000015
913	main-effect	TL	0	135	0.0224000000000011
914	main-effect	TL	0	117	0.0287999999999293
915	main-effect	TL	0	149	0.0343999999999998
916	main-effect	TL	0	150	0.0543999999999993
917	main-effect	TL	0	142	0.0223999999999993
918	main-effect	BR	0	109	0.0280000000000005
919	main-effect	BR	0	149	0.0216000000000003
920	main-effect	BR	0	131	0.0263999999999989
921	main-effect	BR	0	191	0.0336000000000016
922	main-effect	BR	0	158	0.0296000000000003
923	main-effect	BR	0	159	0.032
924	main-effect	BR	0	107	0.024799999999999
925	main-effect	BR	0	126	0.0263999999999989
926	main-effect	BR	0	137	0.0335999999999999
927	main-effect	BR	1	173	0.0519999999999991
928	main-effect	BR	0	150	0.026399999999995
929	main-effect	BR	0	108	0.0200000000000102
930	main-effect	BR	0	153	0.0383999999999993
931	main-effect	BR	0	128	0.0231999999999992
932	main-effect	BR	0	217	0.0288000000000004
933	main-effect	BR	0	114	0.0279999999999987
934	main-effect	BR	0	222	0.024799999999999
935	main-effect	BR	0	115	0.0215999999999994
936	main-effect	BR	0	93	0.0216000000000305
937	main-effect	BR	0	99	0.0231999999999708
938	main-effect	BR	0	168	0.0368000000000315
939	main-effect	BR	0	150	0.0224000000000011
940	main-effect	BR	0	110	0.0231999999999797
941	main-effect	BR	0	160	0.0471999999999699
942	main-effect	BR	0	127	0.0216000000000012
943	main-effect	BR	0	96	0.0256000000000007
944	main-effect	BR	0	150	0.0304000000000002
945	main-effect	BR	0	140	0.0335999999999999
946	main-effect	BR	0	131	0.02800000000002
947	main-effect	BR	0	129	0.0495999999999999
948	main-effect	BR	0	143	0.0375999999999896
949	main-effect	BR	0	129	0.024
950	main-effect	BR	0	193	0.0304000000000002
951	main-effect	BR	0	156	0.0296000000000003
952	main-effect	BR	0	194	0.0239999999999991
953	main-effect	BR	0	171	0.0280000000000005
954	main-effect	BR	0	174	0.0343999999999998
955	main-effect	BR	0	106	0.0272000000000006
956	main-effect	BR	0	144	0.0231999999999992
957	main-effect	BR	0	162	0.0383999999999993
958	main-effect	BR	0	159	0.0527999999999977
959	main-effect	BR	0	177	0.0511999999999979
960	main-effect	BR	0	123	0.0328000000000017
961	main-effect	BR	0	193	0.0343999999999998
962	main-effect	BR	0	180	0.0239999999999991
963	main-effect	BR	0	127	0.0399999999999991
964	main-effect	BR	0	104	0.0231999999999992
965	main-effect	TL	0	120	0.032
966	main-effect	TL	0	155	0.038399999999999
967	main-effect	TL	0	149	0.056
968	main-effect	TL	0	140	0.0215999999999998
969	main-effect	TL	0	135	0.0216000000000003
970	main-effect	TL	0	134	0.0272000000000006
971	main-effect	TL	0	103	0.0231999999999992
972	main-effect	TL	0	193	0.0312000000000001
973	main-effect	TL	0	131	0.0263999999999989
974	main-effect	TL	0	180	0.0391999999999899
975	main-effect	TL	0	122	0.0335999999999714
976	main-effect	TL	0	178	0.0423999999999971
977	main-effect	TL	0	135	0.0367999999999995
978	main-effect	TL	0	160	0.0248000000000008
979	main-effect	TL	0	170	0.039200000000001
980	main-effect	TL	0	194	0.0312000000000001
981	main-effect	TL	0	115	0.0240000000000009
982	main-effect	TL	0	160	0.0400000000000009
983	main-effect	TL	0	108	0.021600000000003
984	main-effect	TL	0	212	0.0264000000000024
985	main-effect	TL	0	145	0.0431999999999988
986	main-effect	TL	0	183	0.0255999999999972
987	main-effect	TL	0	145	0.0328000000000017
988	main-effect	TL	0	129	0.0295999999999985
989	main-effect	TL	0	187	0.0400000000000027
990	main-effect	TL	0	174	0.0360000000000014
991	main-effect	TL	0	125	0.0239999999999991
992	main-effect	TL	0	148	0.039200000000001
993	main-effect	TL	0	199	0.0232000000000028
994	main-effect	TL	0	128	0.0224000000000011
995	main-effect	TL	0	118	0.0231999999999992
996	main-effect	TL	0	157	0.0519999999999996
997	main-effect	TL	0	174	0.0272000000000006
998	main-effect	TL	0	150	0.0344000000000015
999	main-effect	TL	0	192	0.0312000000000199
1000	main-effect	TL	0	98	0.0224000000000002
1001	main-effect	TL	0	181	0.0239999999999991
1002	main-effect	TL	0	135	0.0272000000000006
1003	main-effect	TL	0	99	0.0224000000000011
1004	main-effect	TL	0	103	0.0303999999999967
1005	main-effect	TL	0	159	0.0384000000000029
1006	main-effect	TL	0	204	0.0287999999999995
1007	main-effect	TL	0	162	0.0384000000000021
1008	main-effect	TL	0	188	0.0343999999999998
1009	main-effect	TL	0	150	0.0608000000000004
1010	main-effect	TL	0	220	0.0231999999999992
1011	main-effect	TL	0	154	0.0319999999999805
1012	main-effect	TL	0	98	0.0271999999999997
1013	main-effect	TL	0	153	0.0464000000000002
1014	main-effect	TL	0	128	0.0335999999999999
1015	main-effect	TL	0	162	0.0407999999999973
1016	gfp-control	GD	0	221	0.0240000000000009
1017	gfp-control	GD	0	158	0.071200000000001
1018	gfp-control	GD	0	155	0.0592000000000006
1019	gfp-control	GD	1	174	0.0296000000000003
1020	gfp-control	GD	0	153	0.0527999999999897
1021	gfp-control	GD	0	149	0.0359999999999996
1022	gfp-control	GD	0	112	0.0296000000000003
1023	gfp-control	GD	0	175	0.0424000000000007
1024	gfp-control	GD	0	127	0.0231999999999992
1025	gfp-control	GD	0	168	0.0224000000000011
1026	gfp-control	GD	0	121	0.0295999999999985
1027	gfp-control	GD	0	167	0.0352000000000401
1028	gfp-control	GD	0	165	0.0295999999999594
1029	gfp-control	GD	0	156	0.0335999999999999
1030	gfp-control	GD	0	196	0.032
1031	gfp-control	GD	1	138	0.0231999999999992
1032	gfp-control	GD	0	157	0.0536
1033	gfp-control	GD	1	169	0.0288000000000004
1034	gfp-control	GD	1	184	0.0208000000000013
1035	gfp-control	GD	1	133	0.0576000000000008
1036	gfp-control	GD	1	163	0.0408000000000008
1037	gfp-control	GD	0	205	0.0272000000000001
1038	gfp-control	GD	1	162	0.0600000000000023
1039	gfp-control	GD	1	175	0.0432000000000023
1040	gfp-control	GD	0	165	0.0255999999999998
1041	gfp-control	GD	0	180	0.0400000000000009
1042	gfp-control	GD	1	133	0.0519999999999996
1043	gfp-control	GD	1	156	0.0792000000000002
1044	gfp-control	GD	1	139	0.0231999999999992
1045	gfp-control	GD	0	180	0.04239999999999
1046	gfp-control	GD	1	141	0.0231999999999992
1047	gfp-control	GD	0	217	0.0248000000000026
1048	gfp-control	GD	0	184	0.027199999999997
1049	gfp-control	GD	1	172	0.0232000000000001
1050	gfp-control	GD	0	159	0.0519999999999929
1051	gfp-control	GD	0	180	0.0327999999999902
1052	gfp-control	GD	0	186	0.0208000000000013
1053	gfp-control	GD	0	169	0.0360000000000014
1054	gfp-control	GD	1	168	0.0464000000000002
1055	gfp-control	GD	1	205	0.0279999999999987
1056	gfp-control	GD	1	141	0.0967999999999982
1057	gfp-control	GD	0	201	0.0304000000000002
1058	gfp-control	GD	0	196	0.032
1059	gfp-control	GD	0	134	0.0391999999999975
1060	gfp-control	GD	0	223	0.0224000000000011
1061	gfp-control	GD	1	153	0.0631999999999913
1062	gfp-control	GD	1	169	0.0599999999999987
1063	gfp-control	GD	1	184	0.0208000000000013
1064	gfp-control	GD	1	195	0.032
1065	gfp-control	GD	1	182	0.0424000000000007
1066	gfp-control	GD	0	162	0.0408000000000008
1067	gfp-control	GD	0	138	0.0232000000000028
1068	gfp-control	GD	0	170	0.032
1069	gfp-control	GD	1	187	0.0336000000000101
1070	gfp-control	GD	0	132	0.028
1071	gfp-control	GD	1	103	0.0256000000000007
1072	gfp-control	GD	1	196	0.0424000000000007
1073	gfp-control	GD	0	163	0.0320000000000391
1074	gfp-control	GD	0	172	0.0447999999999009
1075	gfp-control	GD	0	139	0.0264000000000006
1076	gfp-control	GD	0	175	0.0399999999999991
1077	gfp-control	GD	0	144	0.0576000000000008
1078	gfp-control	GD	0	172	0.0215999999999994
1079	gfp-control	GD	1	178	0.0503999999999998
1080	gfp-control	GD	1	142	0.0279999999999987
1081	gfp-control	GD	1	189	0.156000000000001
1082	gfp-control	GD	1	174	0.048
1083	gfp-control	GD	1	176	0.0631999999999984
1084	gfp-control	GD	1	156	0.0991999999999997
1085	gfp-control	GD	0	161	0.0224000000000011
1086	gfp-control	GD	0	118	0.0231999999999992
1087	gfp-control	GD	0	171	0.0399999999999991
1088	gfp-control	GD	1	181	0.0263999999999998
1089	gfp-control	GD	1	173	0.0359999999999996
1090	gfp-control	GD	1	181	0.0576000000000008
1091	gfp-control	GD	1	161	0.0680000000000014
1092	gfp-control	GD	1	180	0.102399999999999
1093	gfp-control	GD	0	174	0.04239999999999
1094	gfp-control	GD	0	163	0.0328000000000106
1095	gfp-control	GD	0	128	0.0271999999999899
1096	gfp-control	GD	0	145	0.0215999999999994
1097	gfp-control	GD	0	212	0.0264000000000024
1098	gfp-control	GD	0	95	0.0199999999999996
1099	gfp-control	GD	0	137	0.0440000000000005
1100	gfp-control	GD	0	100	0.0391999999999975
1101	gfp-control	GD	1	122	0.0400000000000027
1102	gfp-control	GD	1	186	0.039200000000001
1103	gfp-control	GD	0	135	0.0287999999999986
1104	gfp-control	GD	0	177	0.041599999999999
1105	gfp-control	GD	0	149	0.0351999999999997
1106	gfp-control	GD	1	129	0.0224000000000011
1107	gfp-control	OS	0	153	0.0488
1108	gfp-control	OS	0	234	0.0215999999999998
1109	gfp-control	OS	0	111	0.0216000000000003
1110	gfp-control	OS	0	125	0.0272000000000006
1111	gfp-control	OS	0	201	0.0304000000000002
1112	gfp-control	OS	0	159	0.0215999999999994
1113	gfp-control	OS	0	163	0.0344000000000015
1114	gfp-control	OS	1	156	0.0335999999999999
1115	gfp-control	OS	1	181	0.0256000000000007
1116	gfp-control	OS	1	201	0.0287999999999995
1117	gfp-control	OS	1	174	0.0464000000000002
1118	gfp-control	OS	1	201	0.0391999999999992
1119	gfp-control	OS	1	208	0.032
1120	gfp-control	OS	1	182	0.0359999999999978
1121	gfp-control	OS	0	163	0.0488
1122	gfp-control	OS	0	140	0.0383999999999998
1123	gfp-control	OS	0	149	0.0336000000000096
1124	gfp-control	OS	0	175	0.0424000000000007
1125	gfp-control	OS	0	158	0.0416000000000007
1126	gfp-control	OS	0	157	0.0560000000000116
1127	gfp-control	OS	0	108	0.0208000000000013
1128	gfp-control	OS	0	176	0.0296000000000003
1129	gfp-control	OS	0	112	0.0207999999999995
1130	gfp-control	OS	0	168	0.048
1131	gfp-control	OS	0	112	0.0248000000000008
1132	gfp-control	OS	0	148	0.0599999999999987
1133	gfp-control	OS	0	194	0.0335999999999999
1134	gfp-control	OS	0	111	0.0263999999999989
1135	gfp-control	OS	0	199	0.032
1136	gfp-control	OS	0	80	0.0288000000000004
1137	gfp-control	OS	0	195	0.0335999999999999
1138	gfp-control	OS	0	153	0.0575999999999972
1139	gfp-control	OS	1	212	0.032
1140	gfp-control	OS	1	184	0.032
1141	gfp-control	OS	1	173	0.0528000000000013
1142	gfp-control	OS	1	80	0.0288000000000004
1143	gfp-control	OS	1	123	0.0296000000000021
1144	gfp-control	OS	1	210	0.0288000000000004
1145	gfp-control	OS	1	129	0.0304000000000002
1146	gfp-control	OS	1	108	0.0304000000000002
1147	gfp-control	OS	0	160	0.06640000000002
1148	gfp-control	OS	0	144	0.0207999999999799
1149	gfp-control	OS	0	170	0.0408000000000199
1150	gfp-control	OS	0	141	0.0232000000000001
1151	gfp-control	OS	0	134	0.0407999999999897
1152	gfp-control	OS	0	136	0.0295999999999896
1153	gfp-control	OS	0	90	0.0200000000000085
1154	gfp-control	OS	0	151	0.0440000000000005
1155	gfp-control	OS	0	87	0.0224000000000011
1156	gfp-control	OS	0	159	0.0512000000000015
1157	gfp-control	OS	0	148	0.0383999999999993
1158	gfp-control	OS	1	179	0.0408000000000202
1159	gfp-control	OS	1	161	0.0679999999999907
1160	gfp-control	OS	1	196	0.0320000000000107
1161	gfp-control	OS	1	177	0.04640000000001
1162	gfp-control	OS	1	114	0.025599999999999
1163	gfp-control	OS	1	150	0.0519999999999907
1164	gfp-control	OS	1	157	0.0464000000000002
1165	gfp-control	OS	1	108	0.025599999999999
1166	gfp-control	OS	1	119	0.0264000000000024
1167	gfp-control	OS	1	164	0.032
1168	gfp-control	OS	1	206	0.0287999999999968
1169	gfp-control	OS	1	166	0.0376000000000012
1170	gfp-control	OS	0	141	0.0255999999999998
1171	gfp-control	OS	0	165	0.0351999999999997
1172	gfp-control	OS	0	110	0.0263999999999989
1173	gfp-control	OS	0	146	0.0935999999999986
1174	gfp-control	OS	0	139	0.0440000000000005
1175	gfp-control	OS	0	131	0.0375999999999976
1176	gfp-control	OS	1	155	0.0519999999999596
1177	gfp-control	OS	1	163	0.0584000000000096
1178	gfp-control	OS	1	156	0.0456000000000394
1179	gfp-control	OS	1	105	0.0207999999999995
1180	gfp-control	OS	1	162	0.0447999999999986
1181	gfp-control	OS	1	80	0.0263999999999989
1182	gfp-control	OS	1	141	0.0264000000000024
1183	gfp-control	OS	1	168	0.0399999999999991
1184	gfp-control	OS	1	150	0.0328000000000017
1185	gfp-control	OS	1	168	0.0344000000000015
1186	gfp-control	OS	0	92	0.0215999999999803
1187	gfp-control	OS	0	164	0.025599999999999
1188	gfp-control	OS	0	157	0.0511999999999997
1189	gfp-control	OS	0	167	0.0391999999999992
1190	gfp-control	OS	0	140	0.0344000000000015
1191	gfp-control	OS	0	156	0.066399999999998
1192	gfp-control	OS	1	158	0.0544000000000011
1193	gfp-control	OS	1	109	0.0215999999999994
1194	gfp-control	OS	1	114	0.0240000000000009
1195	gfp-control	OS	1	142	0.0272000000000006
1196	gfp-control	OS	1	165	0.0552000000000028
1197	gfp-control	OS	1	124	0.0272000000000006
1198	gfp-control	OS	1	158	0.0631999999999984
1199	gfp-control	OS	1	142	0.0408000000000008
1200	gfp-control	OS	1	175	0.0344000000000015
1201	gfp-control	OS	1	156	0.0560000000000009
1202	gfp-control	OS	1	174	0.0592000000000006
1203	gfp-control	OS	0	168	0.04879999999998
1204	gfp-control	OS	0	181	0.0272000000000001
1205	gfp-control	OS	0	166	0.0296000000000096
1206	gfp-control	OS	0	112	0.0288000000000501
1207	gfp-control	OS	0	170	0.0471999999999699
1208	gfp-control	OS	0	213	0.0264000000000006
1209	gfp-control	OS	0	109	0.0264000000000006
1210	gfp-control	OS	0	197	0.032
1211	gfp-control	OS	0	219	0.024799999999999
1212	gfp-control	OS	0	167	0.0376000000000012
1213	gfp-control	OS	0	173	0.041599999999999
1214	gfp-control	OS	0	163	0.032
1215	gfp-control	OS	0	160	0.0359999999999978
1216	gfp-control	OS	1	207	0.030399999999986
1217	gfp-control	OS	1	162	0.0399999999999698
1218	gfp-control	OS	1	165	0.0399999999999991
1219	gfp-control	OS	1	142	0.0215999999999994
1220	gfp-control	OS	1	164	0.0592000000000006
1221	gfp-control	OS	1	152	0.0679999999999019
1222	gfp-control	OS	1	113	0.0215999999999994
1223	gfp-control	OS	1	155	0.0384000000000029
1224	gfp-control	OS	1	200	0.0279999999999028
1225	gfp-control	OS	1	165	0.0520000000001026
1226	gfp-control	OS	1	138	0.034399999999998
1227	gfp-control	OS	1	166	0.0519999999999996
1228	gfp-control	OS	0	151	0.0352000000000399
1229	gfp-control	OS	0	144	0.03519999999992
1230	gfp-control	OS	0	123	0.0256000000000505
1231	gfp-control	OS	0	149	0.0424000000000007
1232	gfp-control	OS	0	179	0.0408000000000008
1233	gfp-control	OS	1	197	0.0375999999999976
1234	gfp-control	OS	1	125	0.0640000000000995
1235	gfp-control	OS	1	169	0.046399999999899
1236	gfp-control	OS	0	162	0.104799999999901
1237	gfp-control	OS	0	162	0.041599999999999
1238	gfp-control	OS	0	134	0.0296000000000021
1239	gfp-control	OS	0	120	0.0256000000000007
1240	gfp-control	OS	0	103	0.0208000000000013
1241	gfp-control	OS	0	134	0.0319999999999006
1242	gfp-control	OS	1	194	0.0335999999999799
1243	gfp-control	OS	1	115	0.0208000000000101
1244	gfp-control	OS	0	162	0.048
1245	gfp-control	OS	0	150	0.0640000000000698
1246	gfp-control	OS	0	115	0.0288000000000412
1247	gfp-control	OS	0	156	0.0488
1248	gfp-control	OS	0	125	0.0311999999999983
1249	gfp-control	OS	0	171	0.0768000000000981
1250	gfp-control	OS	0	147	0.0872000000000988
1251	gfp-control	OS	0	157	0.0416000000000025
1252	gfp-control	OS	0	92	0.0232000000000987
1253	gfp-control	OS	1	141	0.030399999999986
1254	gfp-control	OS	1	171	0.048000000000002
1255	gfp-control	OS	1	164	0.0384000000000241
1256	gfp-control	OS	1	151	0.0248000000000301
1257	gfp-control	OS	1	178	0.0463999999999505
1258	gfp-control	OS	1	194	0.0248000000000301
1259	gfp-control	OS	1	231	0.0216000000000305
1260	gfp-control	OS	1	137	0.0215999999999301
1261	gfp-control	OS	1	152	0.0312000000000197
1262	gfp-control	OS	1	138	0.0511999999999802
1263	gfp-control	OS	1	179	0.0376000000000012
1264	gfp-control	OS	1	160	0.0399999999999991
1265	gfp-control	OS	1	161	0.0479999999999983
1266	gfp-control	OS	1	137	0.0272000000000006
1267	gfp-control	OS	1	152	0.032
1268	gfp-control	OS	1	174	0.0511999999999979
1269	gfp-control	OS	0	183	0.0352000000000361
1270	gfp-control	OS	0	182	0.0391999999999406
1271	gfp-control	OS	0	153	0.0431999999999606
1272	gfp-control	OS	0	173	0.05200000000002
1273	gfp-control	OS	0	178	0.0288000000000412
1274	gfp-control	OS	0	145	0.0335999999999803
1275	gfp-control	OS	0	227	0.0247999999999209
1276	gfp-control	OS	0	143	0.0224000000000597
1277	gfp-control	OS	0	158	0.0775999999999968
1278	gfp-control	OS	0	163	0.0488
1279	gfp-control	OS	0	184	0.0455999999999008
1280	gfp-control	OS	0	145	0.0312000000001014
1281	gfp-control	OS	1	140	0.0303999999999807
1282	gfp-control	OS	1	113	0.0224000000001006
1283	gfp-control	OS	1	178	0.0383999999999998
1284	gfp-control	OS	1	175	0.0424000000000002
1285	gfp-control	OS	1	122	0.0216000000000003
1286	gfp-control	OS	1	167	0.0551999999999997
1287	gfp-control	OS	0	98	0.0231999999999999
1288	gfp-control	OS	0	156	0.0568
1289	gfp-control	OS	0	159	0.0280000000000098
1290	gfp-control	OS	0	134	0.0296000000000101
1291	gfp-control	OS	0	167	0.0495999999999999
1292	gfp-control	OS	0	144	0.0303999999999984
1293	gfp-control	OS	0	124	0.024799999999999
1294	gfp-control	OS	0	152	0.0480000000000018
1295	gfp-control	OS	0	149	0.0304000000000002
1296	gfp-control	OS	0	186	0.0279999999999987
1297	gfp-control	OS	0	151	0.0224000000000011
1298	gfp-control	OS	1	167	0.0592000000000042
1299	gfp-control	OS	1	166	0.025600000000011
1300	gfp-control	OS	1	138	0.036000000000001
1301	gfp-control	OS	1	162	0.0327999999999999
1302	gfp-control	OS	1	172	0.0416000000000007
1303	gfp-control	OS	1	165	0.048
1304	gfp-control	OS	1	169	0.0432000000000023
1305	gfp-control	OS	1	162	0.0503999999999998
1306	gfp-control	OS	1	174	0.0368000000000031
1307	gfp-control	OS	0	161	0.03839999999999
1308	gfp-control	OS	0	158	0.0383999999999904
1309	gfp-control	OS	0	171	0.0423999999999989
1310	gfp-control	OS	0	161	0.034399999999998
1311	gfp-control	OS	0	187	0.046400000000002
1312	gfp-control	OS	0	113	0.0256000000000007
1313	gfp-control	OS	0	150	0.0471999999999966
1314	gfp-control	OS	0	146	0.0456000000000003
1315	gfp-control	OS	0	135	0.0240000000000009
1316	gfp-control	OS	1	158	0.0528000000000202
1317	gfp-control	OS	1	116	0.0255999999999998
1318	gfp-control	OS	1	137	0.046400000000002
1319	gfp-control	OS	1	177	0.0551999999999992
1320	gfp-control	OS	1	143	0.0224000000000011
1321	gfp-control	OS	1	163	0.0592000000000006
1322	gfp-control	OS	1	164	0.0640000000000001
1323	gfp-control	OS	0	215	0.0247999999999706
1324	gfp-control	OS	0	98	0.0231999999999801
1325	gfp-control	OS	0	146	0.0312000000000103
1326	gfp-control	OS	0	197	0.03200000000004
1327	gfp-control	OS	0	180	0.0407999999999902
1328	gfp-control	OS	0	162	0.0432000000000006
1329	gfp-control	OS	0	156	0.0472000000000001
1330	gfp-control	OS	0	134	0.0231999999999992
1331	gfp-control	OS	0	108	0.0327999999999982
1332	gfp-control	OS	0	152	0.0679999999999978
1333	gfp-control	OS	0	146	0.0399999999999991
1334	gfp-control	OS	0	92	0.0215999999999994
1335	gfp-control	OS	0	95	0.0240000000000009
1336	gfp-control	OS	0	212	0.0264000000000024
1337	gfp-control	OS	0	193	0.0208000000000013
1338	gfp-control	OS	0	152	0.0272000000000006
1339	gfp-control	OS	1	159	0.0871999999999993
1340	gfp-control	OS	1	186	0.0223999999999407
1341	gfp-control	OS	1	191	0.0391999999999992
1342	gfp-control	OS	1	181	0.0544000000000011
1343	gfp-control	OS	1	158	0.0440000000000005
1344	gfp-control	OS	1	143	0.0543999999999993
1345	gfp-control	OS	1	195	0.0240000000000009
1346	gfp-control	OS	1	149	0.0872000000000028
1347	gfp-control	OS	1	158	0.0624000000000002
1348	gfp-control	OS	1	121	0.0296000000000021
1349	gfp-control	OS	1	171	0.0544000000000011
1350	gfp-control	OS	1	177	0.0424000000000007
1351	gfp-control	OS	1	139	0.0231999999999992
1352	gfp-control	OS	1	125	0.0312000000000019
1353	gfp-control	OS	0	123	0.023200000000001
1354	gfp-control	OS	0	186	0.0288000000000004
1355	gfp-control	OS	0	146	0.0375999999999994
1356	gfp-control	OS	0	167	0.0495999999999999
1357	gfp-control	OS	0	168	0.0488
1358	gfp-control	OS	0	151	0.0400000000000027
1359	gfp-control	OS	0	125	0.0335999999999999
1360	gfp-control	OS	1	159	0.0351999999999997
1361	gfp-control	OS	1	170	0.0424000000000007
1362	gfp-control	OS	1	97	0.0224000000000011
1363	gfp-control	OS	1	118	0.0231999999999992
1364	gfp-control	OS	1	156	0.0512000000000015
1365	gfp-control	OS	0	150	0.0288000000000501
1366	gfp-control	OS	0	156	0.0616000000000003
1367	gfp-control	OS	0	112	0.0216000000000989
1368	gfp-control	OS	0	157	0.0311999999999983
1369	gfp-control	OS	0	107	0.0208000000000013
1370	gfp-control	OS	0	164	0.0279999999999987
1371	gfp-control	OS	0	89	0.0240000000000009
1372	gfp-control	OS	0	156	0.0472000000000001
1373	gfp-control	OS	0	165	0.0448000000000022
1374	gfp-control	OS	1	184	0.0376000000000003
1375	gfp-control	OS	1	191	0.0424000000000397
1376	gfp-control	OS	1	139	0.0288000000000501
1377	gfp-control	OS	1	158	0.0856000000000012
1378	gfp-control	OS	1	134	0.0240000000000009
1379	gfp-control	OS	1	140	0.0600000000000005
1380	gfp-control	OS	1	227	0.0224000000000011
1381	gfp-control	OS	1	123	0.0215999999999994
1382	gfp-control	OS	1	176	0.0408000000000008
1383	gfp-control	OS	1	148	0.0231999999999992
1384	gfp-control	OS	1	165	0.0511999999999979
1385	gfp-control	OS	1	146	0.0496000000000016
1386	gfp-control	OS	1	100	0.0272000000000006
1387	gfp-control	OS	1	80	0.0248000000001021
1388	gfp-control	OS	1	137	0.0648000000000017
1389	gfp-control	OS	0	159	0.0431999999999561
1390	gfp-control	OS	0	200	0.03600000000006
1391	gfp-control	OS	0	169	0.0200000000000902
1392	gfp-control	OS	0	204	0.0287999999999009
1393	gfp-control	OS	0	164	0.0399999999999991
1394	gfp-control	OS	0	211	0.0264000000001019
1395	gfp-control	OS	0	167	0.0312000000000019
1396	gfp-control	OS	0	171	0.0519999999999996
1397	gfp-control	OS	0	95	0.0224000000000011
1398	gfp-control	OS	0	159	0.0512000000000015
1399	gfp-control	OS	1	207	0.02160000000003
1400	gfp-control	OS	1	153	0.048
1401	gfp-control	OS	1	203	0.0303999999999798
1402	gfp-control	OS	1	165	0.0440000000000005
1403	gfp-control	OS	1	165	0.0727999999999991
1404	gfp-control	OS	1	80	0.0216000000001006
1405	gfp-control	OS	1	109	0.0264000000001001
1406	gfp-control	OS	1	202	0.0312000000000001
1407	gfp-control	OS	1	181	0.0312000000000001
1408	gfp-control	OS	1	167	0.0495999999999981
1409	gfp-control	OS	1	168	0.059199999999997
1410	gfp-control	OS	1	230	0.0287999999999009
1411	gfp-control	OS	0	154	0.0456000000000398
1412	gfp-control	OS	0	131	0.031200000000009
1413	gfp-control	OS	0	152	0.1047999999999
1414	gfp-control	OS	0	172	0.071200000000001
1415	gfp-control	OS	0	152	0.0311999999999006
1416	gfp-control	OS	0	141	0.0439999999999987
1417	gfp-control	OS	0	164	0.0439999999998975
1418	gfp-control	OS	0	213	0.0263999999998994
1419	gfp-control	OS	1	150	0.0343999999999998
1420	gfp-control	OS	1	145	0.0520000000001009
1421	gfp-control	OS	1	184	0.024799999999999
1422	gfp-control	OS	1	138	0.0704000000000988
1423	gfp-control	OS	1	99	0.0215999999999994
1424	gfp-control	OS	0	132	0.039999999999963
1425	gfp-control	OS	0	157	0.0391999999999397
1426	gfp-control	OS	0	160	0.0511999999999997
1427	gfp-control	OS	0	205	0.0248000000000985
1428	gfp-control	OS	0	170	0.0399999999999991
1429	gfp-control	OS	0	170	0.0543999999998981
1430	gfp-control	OS	0	142	0.0304000000000002
1431	gfp-control	OS	0	156	0.0423999999999012
1432	gfp-control	OS	0	110	0.0304000000000997
1433	gfp-control	OS	0	159	0.0432000000000983
1434	gfp-control	OS	0	156	0.029599999999899
1435	gfp-control	OS	1	162	0.0407999999999991
1436	gfp-control	OS	1	193	0.0376000000000012
1437	gfp-control	OS	1	199	0.0328000000000017
1438	gfp-control	OS	1	153	0.0240000000000009
1439	gfp-control	OS	1	174	0.0271999999999011
1440	gfp-control	OS	1	101	0.0215999999999994
1441	gfp-control	OS	1	180	0.0400000000000986
1442	gfp-control	OS	0	172	0.0512000000001001
1443	gfp-control	OS	0	132	0.0207999999999999
1444	gfp-control	OS	0	150	0.0216000000000296
1445	gfp-control	OS	0	151	0.032
1446	gfp-control	OS	1	132	0.024
1447	gfp-control	OS	1	150	0.0360000000000493
1448	gfp-control	OS	1	163	0.05200000000002
1449	gfp-control	OS	1	99	0.0223999999999398
1450	gfp-control	OS	1	178	0.0696000000000394
1451	gfp-control	OS	1	95	0.0216000000000012
1452	gfp-control	OS	1	186	0.0391999999999975
1453	gfp-control	OS	1	178	0.0399999999999991
1454	gfp-control	OS	1	173	0.0431999999998993
1455	gfp-control	OS	1	165	0.0599999999999028
1456	gfp-control	OS	1	171	0.032
1457	gfp-control	OS	1	126	0.0224000000000011
1458	gfp-control	OS	1	127	0.0376000000000012
1459	gfp-control	OS	1	158	0.0664000000000016
1460	gfp-control	OS	0	141	0.0335999999999999
1461	gfp-control	OS	0	178	0.0376000000000003
1462	gfp-control	OS	0	146	0.0856000000000003
1463	gfp-control	OS	0	95	0.0207999999999995
1464	gfp-control	OS	0	186	0.0359999999999996
1465	gfp-control	OS	0	109	0.0280000000000005
1466	gfp-control	OS	0	163	0.0359999999999996
1467	gfp-control	OS	0	181	0.0424000000000007
1468	gfp-control	OS	0	170	0.0464000000000002
1469	gfp-control	OS	0	121	0.0351999999999997
1470	gfp-control	OS	0	208	0.0336000000000016
1471	gfp-control	OS	1	170	0.0488
1472	gfp-control	OS	1	91	0.0231999999999992
1473	gfp-control	OS	1	166	0.0704000000000002
1474	gfp-control	OS	1	201	0.0392000000000001
1475	gfp-control	OS	1	155	0.0760000000000005
1476	gfp-control	OS	1	154	0.0295999999999985
1477	gfp-control	OS	1	146	0.0295999999999985
1478	gfp-control	OS	0	161	0.0663999999999998
1479	gfp-control	OS	0	106	0.0208000000000013
1480	gfp-control	OS	0	164	0.0535999999999994
1481	gfp-control	OS	0	171	0.0664000000000016
1482	gfp-control	OS	0	162	0.0551999999999992
1483	gfp-control	OS	0	100	0.0280000000000022
1484	gfp-control	OS	1	193	0.031999999999996
1485	gfp-control	OS	1	102	0.0255999999999901
1486	gfp-control	OS	1	176	0.0503999999999998
1487	gfp-control	OS	1	166	0.0631999999999984
1488	gfp-control	OS	1	155	0.0512000000000015
1489	gfp-control	OS	1	111	0.0296000000000021
1490	gfp-control	OS	1	198	0.032
1491	gfp-control	OS	1	143	0.021600000000003
1492	gfp-control	OS	1	115	0.024799999999999
1493	gfp-control	OS	1	179	0.0360000000000014
1494	gfp-control	OS	1	174	0.0519999999999996
1495	gfp-control	OS	0	155	0.0551999999999992
1496	gfp-control	OS	0	133	0.0360000000000014
1497	gfp-control	OS	0	167	0.0376000000000012
1498	gfp-control	OS	0	99	0.0224000000000011
1499	gfp-control	OS	0	160	0.0288000000000004
1500	gfp-control	OS	0	140	0.0295999999999985
1501	gfp-control	OS	0	157	0.0383999999999993
1502	gfp-control	OS	1	160	0.0464
1503	gfp-control	OS	1	161	0.0528000000000102
1504	gfp-control	OS	1	211	0.0288000000000199
1505	gfp-control	OS	1	129	0.0271999999999899
1506	gfp-control	OS	1	176	0.0303999999999984
1507	gfp-control	OS	1	160	0.0399999999999991
1508	gfp-control	OS	1	162	0.0456000000000003
1509	gfp-control	OS	1	160	0.0608000000000004
1510	gfp-control	OS	0	153	0.032
1511	gfp-control	OS	0	159	0.0479999999998988
1512	gfp-control	OS	0	169	0.0391999999999975
1513	gfp-control	OS	1	128	0.0303999999999798
1514	gfp-control	OS	1	175	0.0399999999999707
1515	gfp-control	OS	1	99	0.0231999999999992
1516	gfp-control	OS	1	168	0.0432000000000983
1517	gfp-control	OS	1	136	0.0335999999999999
1518	gfp-control	OS	1	159	0.0288000000000004
1519	gfp-control	OS	0	116	0.0295999999999601
1520	gfp-control	OS	0	166	0.0448000000000099
1521	gfp-control	OS	0	108	0.0264000000000197
1522	gfp-control	OS	0	126	0.0304000000000402
1523	gfp-control	OS	0	148	0.0752000000000006
1524	gfp-control	OS	0	105	0.0272000000000006
1525	gfp-control	OS	0	158	0.0583999999999989
1526	gfp-control	OS	0	198	0.0375999999999976
1527	gfp-control	OS	1	110	0.0239999999999991
1528	gfp-control	OS	1	189	0.027199999999997
1529	gfp-control	OS	1	132	0.0208000000000013
1530	gfp-control	OS	0	143	0.0343999999999998
1531	gfp-control	OS	0	100	0.023200000000001
1532	gfp-control	OS	0	176	0.0407999999999991
1533	gfp-control	OS	0	120	0.0256000000000007
1534	gfp-control	OS	0	164	0.0367999999998965
1535	gfp-control	OS	0	151	0.0439999999998975
1536	gfp-control	OS	1	151	0.0576000000001002
1537	gfp-control	OS	1	149	0.0648
1538	gfp-control	OS	1	244	0.0248000000001003
1539	gfp-control	OS	1	174	0.0360000000000014
1540	gfp-control	OS	1	208	0.032
1541	gfp-control	OS	1	151	0.0512000000000015
1542	gfp-control	OS	1	175	0.0327999999999982
1543	gfp-control	OS	1	169	0.0431999999999988
1544	gfp-control	OS	1	162	0.0504000000000033
1545	gfp-control	OS	1	170	0.039199999999898
1546	gfp-control	OS	1	156	0.0599999999998992
1547	gfp-control	OS	0	164	0.048
1548	gfp-control	OS	0	167	0.0423999999999989
1549	gfp-control	OS	0	121	0.0272000000000006
1550	gfp-control	OS	0	104	0.0207999999998982
1551	gfp-control	OS	0	106	0.0232000000000028
1552	gfp-control	OS	1	165	0.0511999999999997
1553	gfp-control	OS	1	156	0.0520000000000298
1554	gfp-control	OS	1	166	0.0343999999999998
1555	gfp-control	OS	1	162	0.0656000000001011
1556	gfp-control	OS	1	155	0.0696000000000012
1557	gfp-control	OS	1	140	0.0367999999999995
1558	gfp-control	OS	1	231	0.0231999999999992
1559	gfp-control	OS	1	160	0.0440000000000005
1560	gfp-control	OS	1	174	0.0456000000000003
1561	gfp-control	OS	1	168	0.0367999999999995
1562	gfp-control	OS	0	218	0.0255999999999399
1563	gfp-control	OS	0	149	0.0632000000000499
1564	gfp-control	OS	0	211	0.0288000000000004
1565	gfp-control	OS	0	172	0.0440000000001
1566	gfp-control	OS	0	194	0.0352000000000992
1567	gfp-control	OS	1	179	0.03200000000004
1568	gfp-control	OS	1	122	0.0431999999999559
1569	gfp-control	OS	1	158	0.0375999999999905
1570	gfp-control	OS	1	165	0.0440000000001
1571	gfp-control	OS	1	169	0.0424000000000007
1572	gfp-control	OS	1	156	0.0399999999999991
1573	gfp-control	OS	1	160	0.0495999999999981
1574	gfp-control	OS	1	139	0.0208000000000013
1575	gfp-control	OS	1	125	0.039200000000001
1576	gfp-control	OS	1	97	0.0256000000000007
1577	gfp-control	OS	0	161	0.0520000000000191
1578	gfp-control	OS	0	158	0.0360000000001008
1579	gfp-control	OS	0	167	0.0576000000000008
1580	gfp-control	OS	0	224	0.024799999999999
1581	gfp-control	OS	0	107	0.039200000000001
1582	gfp-control	OS	0	118	0.032
1583	gfp-control	OS	1	91	0.024
1584	gfp-control	OS	1	161	0.0343999999998905
1585	gfp-control	OS	1	153	0.0679999999999978
1586	gfp-control	OS	0	182	0.0567999999999493
1587	gfp-control	OS	0	131	0.0263999999999704
1588	gfp-control	OS	0	192	0.0375999999999994
1589	gfp-control	OS	0	232	0.0239999999999991
1590	gfp-control	OS	0	159	0.0407999999999973
1591	gfp-control	OS	0	106	0.0208000000001007
1592	gfp-control	OS	1	176	0.0375999999999901
1593	gfp-control	OS	1	153	0.0888000000000995
1594	gfp-control	OS	1	180	0.0456000000000394
1595	gfp-control	OS	1	146	0.0280000000000005
1596	gfp-control	OS	1	173	0.0383999999999993
1597	gfp-control	OS	1	92	0.0215999999999994
1598	gfp-control	OS	1	162	0.0592000000001001
1599	gfp-control	OS	1	105	0.0296000000000998
1600	gfp-control	OS	1	144	0.0231999999999992
1601	gfp-control	OS	1	152	0.0416000000000025
1602	gfp-control	OS	1	165	0.0583999999999989
1603	gfp-control	OS	1	83	0.0224000000001006
1604	gfp-control	OS	1	139	0.0335999999999999
1605	gfp-control	OS	1	135	0.02240000000001
1606	gfp-control	OS	1	162	0.03199999999998
1607	gfp-control	OS	1	84	0.0232000000000001
1608	gfp-control	OS	1	224	0.0280000000000022
1609	gfp-control	OS	0	148	0.0367999999999995
1610	gfp-control	OS	1	118	0.0231999999999992
1611	gfp-control	OS	0	102	0.0280000000000022
1612	gfp-control	OS	0	187	0.0215999999999301
1613	gfp-control	OS	1	177	0.0456000000000003
1614	gfp-control	OS	0	135	0.0344
1615	gfp-control	OS	0	172	0.044
1616	gfp-control	OS	0	132	0.0216000000000003
1617	gfp-control	OS	0	117	0.0359999999999996
1618	gfp-control	OS	0	184	0.0384000000000002
1619	gfp-control	OS	0	164	0.0424000000000007
1620	gfp-control	OS	0	100	0.0223999999999993
1621	gfp-control	OS	0	197	0.0343999999999998
1622	gfp-control	OS	0	162	0.0384000000000029
1623	gfp-control	OS	0	158	0.0344000000000015
1624	gfp-control	OS	0	161	0.071200000000001
1625	gfp-control	OS	1	167	0.0519999999999996
1626	gfp-control	OS	1	148	0.0216000000000003
1627	gfp-control	OS	1	131	0.0215999999999994
1628	gfp-control	OS	1	157	0.0407999999999991
1629	gfp-control	OS	1	143	0.072000000000001
1630	gfp-control	OS	1	163	0.0512000000000015
1631	gfp-control	OS	1	196	0.0248000000000008
1632	gfp-control	OS	1	150	0.034399999999998
1633	gfp-control	OS	1	176	0.0519999999999996
1634	gfp-control	OS	1	159	0.0568000000000026
1635	gfp-control	OS	1	164	0.0440000000000005
1636	gfp-control	OS	0	137	0.0376000000000003
1637	gfp-control	OS	0	93	0.024
1638	gfp-control	OS	0	171	0.04479999999998
1639	gfp-control	OS	0	121	0.0279999999999987
1640	gfp-control	OS	0	123	0.0280000000000005
1641	gfp-control	OS	0	153	0.024799999999999
1642	gfp-control	OS	0	193	0.0256000000000007
1643	gfp-control	OS	0	174	0.039200000000001
1644	gfp-control	OS	0	176	0.046400000000002
1645	gfp-control	OS	0	143	0.0328000000000017
1646	gfp-control	OS	1	150	0.0271999999999901
1647	gfp-control	OS	1	179	0.0416000000000203
1648	gfp-control	OS	1	132	0.0207999999999799
1649	gfp-control	OS	1	131	0.0247999999999902
1650	gfp-control	OS	1	158	0.0423999999999989
1651	gfp-control	OS	1	105	0.0391999999999992
1652	gfp-control	OS	1	160	0.0575999999999972
1653	gfp-control	OS	1	157	0.0527999999999977
1654	gfp-control	OS	1	158	0.0624000000000002
1655	gfp-control	OS	1	167	0.0440000000000005
1656	gfp-control	OS	1	133	0.032
1657	gfp-control	OS	1	210	0.0279999999999987
1658	gfp-control	OS	1	179	0.0399999999999991
1659	gfp-control	OS	1	142	0.0280000000000022
1660	gfp-control	OS	1	161	0.0351999999999997
1661	gfp-control	OS	0	135	0.027999999999963
1662	gfp-control	OS	0	132	0.0240000000000102
1663	gfp-control	OS	0	141	0.0335999999999999
1664	gfp-control	OS	0	178	0.0376000000000012
1665	gfp-control	OS	0	165	0.0335999999999999
1666	gfp-control	OS	0	149	0.021600000000003
1667	gfp-control	OS	0	178	0.0479999999999983
1668	gfp-control	OS	0	181	0.0288000000000004
1669	gfp-control	OS	0	162	0.039200000000001
1670	gfp-control	OS	1	80	0.0256000000000001
1671	gfp-control	OS	1	101	0.0215999999999803
1672	gfp-control	OS	1	139	0.03440000000001
1673	gfp-control	OS	1	164	0.0471999999999699
1674	gfp-control	OS	1	161	0.0592000000000299
1675	gfp-control	OS	1	169	0.0511999999999997
1676	gfp-control	OS	1	208	0.0255999999999972
1677	gfp-control	OS	1	125	0.024799999999999
1678	gfp-control	OS	1	116	0.0368000000000031
1679	gfp-control	OS	1	144	0.0288000000000004
1680	gfp-control	OS	1	160	0.041599999999999
1681	gfp-control	OS	1	102	0.0240000000000009
1682	gfp-control	OS	1	135	0.0272000000000006
1683	gfp-control	OS	1	231	0.024799999999999
1684	gfp-control	OS	1	148	0.0288000000000004
1685	gfp-control	OS	1	171	0.0376000000000012
1686	gfp-control	OS	0	121	0.0312000000000101
1687	gfp-control	OS	0	119	0.0208000000000101
1688	gfp-control	OS	0	165	0.0448000000000102
1689	gfp-control	OS	0	112	0.0208000000000101
1690	gfp-control	OS	0	162	0.0320000000000302
1691	gfp-control	OS	0	105	0.0279999999999694
1692	gfp-control	OS	0	193	0.02800000000002
1693	gfp-control	OS	0	142	0.0271999999999997
1694	gfp-control	OS	0	166	0.0328000000000106
1695	gfp-control	OS	0	155	0.041599999999999
1696	gfp-control	OS	0	156	0.039200000000001
1697	gfp-control	OS	0	141	0.0351999999999997
1698	gfp-control	OS	0	145	0.0304000000000002
1699	gfp-control	OS	0	145	0.0488
1700	gfp-control	OS	1	208	0.0287999999999897
1701	gfp-control	OS	1	116	0.0239999999999991
1702	gfp-control	OS	1	177	0.0312000000000001
1703	gfp-control	OS	1	94	0.024799999999999
1704	gfp-control	OS	1	154	0.0823999999999998
1705	gfp-control	OS	1	179	0.0543999999999993
1706	gfp-control	OS	1	165	0.0504000000000016
1707	gfp-control	OS	1	162	0.0448000000000004
1708	gfp-control	OS	1	156	0.0368000000000013
1709	gfp-control	OS	1	154	0.0296000000000021
1710	gfp-control	OS	1	173	0.0512000000000015
1711	gfp-control	OS	1	166	0.0503999999999998
1712	gfp-control	OS	1	149	0.0328000000000017
1713	gfp-control	OS	0	147	0.0263999999999672
1714	gfp-control	OS	0	172	0.0479999999999992
1715	gfp-control	OS	0	171	0.0352000000000299
1716	gfp-control	OS	0	192	0.0352000000000299
1717	gfp-control	OS	0	136	0.0879999999999992
1718	gfp-control	OS	0	180	0.0296000000000003
1719	gfp-control	OS	0	225	0.0240000000000009
1720	gfp-control	OS	0	156	0.0399999999998997
1721	gfp-control	OS	0	210	0.0312000000000019
1722	gfp-control	OS	0	137	0.0399999999999991
1723	gfp-control	OS	0	152	0.046399999999899
1724	gfp-control	OS	0	190	0.0335999999999004
1725	gfp-control	OS	0	121	0.0223999999999975
1726	gfp-control	OS	1	162	0.0359999999999996
1727	gfp-control	OS	1	150	0.0584000000000007
1728	gfp-control	OS	1	92	0.0224000000001006
1729	gfp-control	OS	1	102	0.0255999999999972
1730	gfp-control	OS	1	162	0.0679999999999019
1731	gfp-control	OS	0	157	0.0383999999999096
1732	gfp-control	OS	0	193	0.031200000000009
1733	gfp-control	OS	0	104	0.0208000000000101
1734	gfp-control	OS	0	154	0.0383999999998998
1735	gfp-control	OS	0	125	0.0272000000000006
1736	gfp-control	OS	0	182	0.0447999999999986
1737	gfp-control	OS	0	91	0.0208000000000013
1738	gfp-control	OS	1	166	0.0496000000000496
1739	gfp-control	OS	1	150	0.0328000000000017
1740	gfp-control	OS	0	96	0.0207999999999977
1741	gfp-control	OS	0	169	0.0519999999999996
1742	gfp-control	OS	0	160	0.0448000000000022
1743	gfp-control	OS	1	149	0.0312000000000119
1744	gfp-control	GD	0	107	0.0272000000000001
1745	gfp-control	GD	0	152	0.0528
1746	gfp-control	GD	0	134	0.023200000000001
1747	gfp-control	GD	0	159	0.0671999999999997
1748	gfp-control	GD	0	199	0.0327999999999999
1749	gfp-control	GD	0	141	0.0368000000000013
1750	gfp-control	GD	0	90	0.0240000000000009
1751	gfp-control	GD	0	167	0.0711999999999975
1752	gfp-control	GD	0	161	0.0560000000000009
1753	gfp-control	GD	0	155	0.0280000000000022
1754	gfp-control	GD	1	108	0.0272000000000006
1755	gfp-control	GD	1	135	0.0335999999999999
1756	gfp-control	GD	0	144	0.0223999999999901
1757	gfp-control	GD	0	108	0.0287999999999999
1758	gfp-control	GD	0	132	0.0280000000000102
1759	gfp-control	GD	0	160	0.0271999999999899
1760	gfp-control	GD	0	172	0.0392000000000001
1761	gfp-control	GD	0	173	0.0408000000000097
1762	gfp-control	GD	0	156	0.0400000000000187
1763	gfp-control	GD	0	134	0.0343999999999998
1764	gfp-control	GD	0	176	0.025599999999999
1765	gfp-control	GD	0	158	0.0631999999999984
1766	gfp-control	GD	0	138	0.0608000000000004
1767	gfp-control	GD	0	106	0.0272000000000006
1768	gfp-control	GD	0	134	0.0240000000000009
1769	gfp-control	GD	0	123	0.0335999999999999
1770	gfp-control	GD	0	152	0.0335999999999999
1771	gfp-control	GD	0	150	0.0359999999999978
1772	gfp-control	GD	1	186	0.0399999999999903
1773	gfp-control	GD	1	156	0.0600000000000005
1774	gfp-control	GD	1	142	0.0304000000000002
1775	gfp-control	GD	1	139	0.0343999999999998
1776	gfp-control	GD	1	143	0.0408000000000008
1777	gfp-control	GD	1	132	0.0352000000000032
1778	gfp-control	GD	1	181	0.0263999999999989
1779	gfp-control	GD	1	126	0.0240000000000009
1780	gfp-control	GD	1	162	0.0544000000000011
1781	gfp-control	GD	1	104	0.0231999999999992
1782	gfp-control	GD	1	174	0.0360000000000014
1783	gfp-control	GD	1	148	0.0831999999999979
1784	gfp-control	GD	1	103	0.0311999999999983
1785	gfp-control	GD	0	161	0.0375999999999994
1786	gfp-control	GD	0	123	0.0399999999999991
1787	gfp-control	GD	0	163	0.0424000000000007
1788	gfp-control	GD	0	153	0.0800000000000018
1789	gfp-control	GD	0	142	0.0351999999999997
1790	gfp-control	GD	0	123	0.0256000000000007
1791	gfp-control	GD	0	147	0.0360000000000014
1792	gfp-control	GD	1	202	0.0304000000000002
1793	gfp-control	GD	1	149	0.0263999999999989
1794	gfp-control	GD	1	100	0.0264000000000024
1795	gfp-control	GD	1	146	0.0304000000000002
1796	gfp-control	GD	1	159	0.0263999999999989
1797	gfp-control	GD	1	149	0.0295999999999985
1798	gfp-control	GD	1	162	0.0416000000000025
1799	gfp-control	GD	0	80	0.03039999999999
1800	gfp-control	GD	0	152	0.0672000000000201
1801	gfp-control	GD	0	132	0.0287999999999897
1802	gfp-control	GD	0	151	0.0399999999999991
1803	gfp-control	GD	0	176	0.0359999999999996
1804	gfp-control	GD	0	163	0.0344000000000015
1805	gfp-control	GD	0	130	0.0255999999999972
1806	gfp-control	GD	1	156	0.0552000000000197
1807	gfp-control	GD	1	165	0.0392000000000499
1808	gfp-control	GD	1	159	0.0640000000000214
1809	gfp-control	GD	1	184	0.0383999999999585
1810	gfp-control	GD	1	189	0.0352000000000015
1811	gfp-control	GD	1	136	0.027199999999997
1812	gfp-control	GD	1	121	0.0408000000000008
1813	gfp-control	GD	1	152	0.0344000000000015
1814	gfp-control	GD	0	150	0.0503999999999998
1815	gfp-control	GD	0	199	0.0304000000000002
1816	gfp-control	GD	0	156	0.032
1817	gfp-control	GD	0	170	0.0471999999999984
1818	gfp-control	GD	0	176	0.0423999999998994
1819	gfp-control	GD	0	165	0.0431999999999988
1820	gfp-control	GD	0	146	0.0215999999999994
1821	gfp-control	GD	0	165	0.0511999999999979
1822	gfp-control	GD	1	129	0.0304000000000002
1823	gfp-control	GD	1	190	0.0335999999999004
1824	gfp-control	GD	1	212	0.0295999999999985
1825	gfp-control	GD	1	181	0.039200000000001
1826	gfp-control	GD	1	161	0.034399999999998
1827	gfp-control	GD	1	154	0.039200000000001
1828	gfp-control	GD	0	182	0.0391999999999402
1829	gfp-control	GD	0	154	0.0431999999999988
1830	gfp-control	GD	0	159	0.0448000000001016
1831	gfp-control	GD	0	207	0.0288000000000004
1832	gfp-control	GD	0	174	0.0335999999999999
1833	gfp-control	GD	0	151	0.0632000000000019
1834	gfp-control	GD	0	168	0.0488
1835	gfp-control	GD	1	136	0.0271999999999936
1836	gfp-control	GD	1	174	0.040799999999991
1837	gfp-control	GD	1	146	0.0768000000000004
1838	gfp-control	GD	1	167	0.0431999999999011
1839	gfp-control	GD	1	130	0.0279999999998992
1840	gfp-control	GD	1	157	0.0583999999999989
1841	gfp-control	GD	1	163	0.0503999999999003
1842	gfp-control	GD	1	171	0.0472000000000001
1843	gfp-control	GD	0	147	0.039200000000049
1844	gfp-control	GD	0	108	0.0296000000000021
1845	gfp-control	GD	0	139	0.0271999999998975
1846	gfp-control	GD	0	135	0.0424000000000007
1847	gfp-control	GD	0	138	0.0224000000000011
1848	gfp-control	GD	0	153	0.0655999999999004
1849	gfp-control	GD	0	138	0.111999999999998
1850	gfp-control	GD	1	152	0.0416000000000096
1851	gfp-control	GD	1	162	0.0599999999999499
1852	gfp-control	GD	1	176	0.0295999999999599
1853	gfp-control	GD	1	148	0.0399999999999698
1854	gfp-control	GD	1	161	0.0319999999998988
1855	gfp-control	GD	1	161	0.0472000000000001
1856	gfp-control	GD	1	112	0.0247999999998996
1857	gfp-control	GD	1	154	0.0503999999999998
1858	gfp-control	GD	1	145	0.0871999999999993
1859	gfp-control	GD	1	131	0.0239999999999974
1860	gfp-control	GD	1	129	0.0320000000000995
1861	gfp-control	GD	1	165	0.0487999999999005
1862	gfp-control	GD	1	130	0.0320000000000995
1863	gfp-control	GD	1	146	0.0256000000000007
1864	gfp-control	GD	1	153	0.0344000000000015
1865	gfp-control	GD	1	134	0.0472000000001032
1866	gfp-control	GD	1	220	0.02479999999992
1867	gfp-control	GD	1	208	0.0287999999998991
1868	gfp-control	GD	1	127	0.0224000000000011
1869	gfp-control	GD	1	109	0.0304000000000002
1870	gfp-control	GD	1	110	0.0295999999999985
1871	gfp-control	GD	1	97	0.0240000000000009
1872	gfp-control	GD	0	147	0.0680000000001
1873	gfp-control	GD	0	141	0.0223999999999496
1874	gfp-control	GD	0	154	0.0591999999999198
1875	gfp-control	GD	0	110	0.0223999999998998
1876	gfp-control	GD	0	208	0.0264000000001019
1877	gfp-control	GD	0	164	0.0624000000000002
1878	gfp-control	GD	0	130	0.032
1879	gfp-control	GD	0	154	0.0383999999999993
1880	gfp-control	GD	0	135	0.0399999999999991
1881	gfp-control	GD	0	188	0.0311999999999983
1882	gfp-control	GD	0	167	0.0296000000000021
1883	gfp-control	GD	1	192	0.0352000000000299
1884	gfp-control	GD	1	146	0.0344000000000002
1885	gfp-control	GD	1	133	0.0295999999999603
1886	gfp-control	GD	1	143	0.0439999999999801
1887	gfp-control	GD	1	153	0.0752000000000006
1888	gfp-control	GD	1	152	0.0391999999998998
1889	gfp-control	GD	1	190	0.0223999999998998
1890	gfp-control	GD	1	80	0.027199999999997
1891	gfp-control	GD	1	178	0.039200000000001
1892	gfp-control	GD	0	107	0.020800000000008
1893	gfp-control	GD	0	135	0.0224000000000609
1894	gfp-control	GD	0	175	0.04240000000004
1895	gfp-control	GD	0	139	0.0448000000000004
1896	gfp-control	GD	1	200	0.0319999999999201
1897	gfp-control	GD	1	133	0.03039999999999
1898	gfp-control	GD	1	174	0.0264000000000806
1899	gfp-control	GD	1	157	0.0327999999999005
1900	gfp-control	GD	1	173	0.0424000000000007
1901	gfp-control	GD	1	158	0.0312000000000001
1902	gfp-control	GD	1	130	0.0352000000000015
1903	gfp-control	GD	1	169	0.0503999999998967
1904	gfp-control	GD	1	167	0.0279999999998992
1905	gfp-control	GD	0	161	0.028
1906	gfp-control	GD	0	143	0.0792000000000002
1907	gfp-control	GD	0	129	0.032
1908	gfp-control	GD	0	102	0.0231999999999992
1909	gfp-control	GD	0	169	0.0423999999999998
1910	gfp-control	GD	0	154	0.0359999999999996
1911	gfp-control	GD	0	153	0.0351999999999997
1912	gfp-control	GD	0	128	0.0343999999999998
1913	gfp-control	GD	0	153	0.0687999999999995
1914	gfp-control	GD	0	140	0.0223999999999993
1915	gfp-control	GD	0	113	0.0207999999999977
1916	gfp-control	GD	0	138	0.0311999999999983
1917	gfp-control	GD	0	167	0.0472000000000001
1918	gfp-control	GD	0	186	0.0344000000000015
1919	gfp-control	GD	1	146	0.025599999999999
1920	gfp-control	GD	1	181	0.0383999999999993
1921	gfp-control	GD	1	180	0.0383999999999993
1922	gfp-control	GD	1	141	0.0303999999999967
1923	gfp-control	GD	1	133	0.102399999999999
1924	gfp-control	GD	1	156	0.0272000000000006
1925	gfp-control	GD	1	131	0.0288000000000004
1926	gfp-control	GD	1	157	0.0583999999999989
1927	gfp-control	GD	1	88	0.0240000000000009
1928	gfp-control	GD	1	137	0.0640000000000001
1929	gfp-control	GD	1	152	0.0776000000000003
1930	gfp-control	GD	1	138	0.0295999999999985
1931	gfp-control	GD	1	164	0.0312000000000019
1932	gfp-control	GD	1	99	0.0240000000000009
1933	gfp-control	GD	1	167	0.0432000000000023
1934	gfp-control	GD	0	147	0.0472000000000001
1935	gfp-control	GD	0	168	0.0504000000000033
1936	gfp-control	GD	0	160	0.0407999999999973
1937	gfp-control	GD	0	92	0.0288000000000004
1938	gfp-control	GD	0	152	0.0328000000000017
1939	gfp-control	GD	0	188	0.0327999999999982
1940	gfp-control	GD	0	125	0.0815999999999981
1941	gfp-control	GD	0	174	0.027199999999997
1942	gfp-control	GD	0	125	0.0528000000000013
1943	gfp-control	GD	0	144	0.0328000000000017
1944	gfp-control	GD	0	121	0.0359999999999978
1945	gfp-control	GD	0	163	0.0503999999999998
1946	gfp-control	GD	1	104	0.0312000000000099
1947	gfp-control	GD	1	93	0.0232000000000303
1948	gfp-control	GD	1	150	0.0815999999999999
1949	gfp-control	GD	1	168	0.0495999999999999
1950	gfp-control	GD	1	187	0.0375999999999994
1951	gfp-control	GD	1	169	0.0447999999999986
1952	gfp-control	GD	1	137	0.0359999999999978
1953	gfp-control	GD	0	175	0.0352000000000299
1954	gfp-control	GD	0	171	0.0439999999999801
1955	gfp-control	GD	0	141	0.0296000000000198
1956	gfp-control	GD	0	151	0.0600000000000005
1957	gfp-control	GD	0	172	0.0351999999999997
1958	gfp-control	GD	0	124	0.0223999999999993
1959	gfp-control	GD	0	176	0.0368000000000031
1960	gfp-control	GD	0	219	0.0231999999999992
1961	gfp-control	GD	0	135	0.0280000000000022
1962	gfp-control	GD	0	129	0.112000000000002
1963	gfp-control	GD	0	146	0.0727999999999973
1964	gfp-control	GD	0	162	0.0424000000000007
1965	gfp-control	GD	0	144	0.0296000000000021
1966	gfp-control	GD	0	166	0.0295999999999985
1967	gfp-control	GD	0	163	0.0408000000000008
1968	gfp-control	GD	0	170	0.0551999999999992
1969	gfp-control	GD	0	118	0.0279999999999987
1970	gfp-control	GD	0	203	0.0272000000000006
1971	gfp-control	GD	1	125	0.034399999999948
1972	gfp-control	GD	1	169	0.0656000000000199
1973	gfp-control	GD	1	118	0.0375999999999999
1974	gfp-control	GD	1	100	0.0223999999999993
1975	gfp-control	GD	1	162	0.0488
1976	gfp-control	GD	1	156	0.0672000000000033
1977	gfp-control	GD	1	154	0.0391999999999975
1978	gfp-control	GD	1	223	0.0215999999999994
1979	gfp-control	GD	1	153	0.0255999999999972
1980	gfp-control	GD	1	168	0.0463999999999984
1981	gfp-control	GD	1	187	0.032
1982	gfp-control	GD	1	115	0.0223999999999975
1983	gfp-control	GD	0	141	0.0407999999999902
1984	gfp-control	GD	0	129	0.0511999999999999
1985	gfp-control	GD	0	178	0.03840000000002
1986	gfp-control	GD	0	149	0.036
1987	gfp-control	GD	0	182	0.0367999999999702
1988	gfp-control	GD	0	179	0.0423999999999989
1989	gfp-control	GD	0	105	0.0224000000000011
1990	gfp-control	GD	0	153	0.0640000000000001
1991	gfp-control	GD	0	165	0.0431999999999988
1992	gfp-control	GD	0	183	0.0351999999999997
1993	gfp-control	GD	0	191	0.032
1994	gfp-control	GD	0	144	0.0687999999999995
1995	gfp-control	GD	0	141	0.0360000000000014
1996	gfp-control	GD	0	144	0.032
1997	gfp-control	GD	0	168	0.0407999999998978
1998	gfp-control	GD	0	182	0.0360000000000014
1999	gfp-control	GD	0	188	0.0375999999998982
[truncated: 255 more rows]
