# Supplementary material for: Make Friends With The Googlebot
Source: eLife journal article supplement (doi:10.7554/elife.65998), 2005-03-14
Supplement: supp [file elife-65998-supp-v1.zip › elife_poa_e65998_Figure_5_source_data_1.csv]

	laserOn	bin_sec	trial_id	incidence
1	0	2.5	2019-09-04_BT_BT031_sleepingStimON_g0_0	0.2
2	0	7.5	2019-09-04_BT_BT031_sleepingStimON_g0_0	0
3	0	12.5	2019-09-04_BT_BT031_sleepingStimON_g0_0	0
4	0	17.5	2019-09-04_BT_BT031_sleepingStimON_g0_0	0.2
5	0	22.5	2019-09-04_BT_BT031_sleepingStimON_g0_0	0
6	0	27.5	2019-09-04_BT_BT031_sleepingStimON_g0_0	0.2
7	1	32.5	2019-09-04_BT_BT031_sleepingStimON_g0_0	0
8	1	37.5	2019-09-04_BT_BT031_sleepingStimON_g0_0	0
9	1	42.5	2019-09-04_BT_BT031_sleepingStimON_g0_0	0
10	1	47.5	2019-09-04_BT_BT031_sleepingStimON_g0_0	0
11	1	52.5	2019-09-04_BT_BT031_sleepingStimON_g0_0	0
12	1	57.5	2019-09-04_BT_BT031_sleepingStimON_g0_0	0
13	0	62.5	2019-09-04_BT_BT031_sleepingStimON_g0_0	0.2
14	0	67.5	2019-09-04_BT_BT031_sleepingStimON_g0_0	0
15	0	72.5	2019-09-04_BT_BT031_sleepingStimON_g0_0	0.6
16	0	77.5	2019-09-04_BT_BT031_sleepingStimON_g0_0	0.2
17	0	82.5	2019-09-04_BT_BT031_sleepingStimON_g0_0	0.4
18	0	87.5	2019-09-04_BT_BT031_sleepingStimON_g0_0	0.4
19	0	2.5	2019-09-04_BT_BT031_sleepingStimON_g0_1	0.2
20	0	7.5	2019-09-04_BT_BT031_sleepingStimON_g0_1	0.4
21	0	12.5	2019-09-04_BT_BT031_sleepingStimON_g0_1	0.2
22	0	17.5	2019-09-04_BT_BT031_sleepingStimON_g0_1	0
23	0	22.5	2019-09-04_BT_BT031_sleepingStimON_g0_1	0.2
24	0	27.5	2019-09-04_BT_BT031_sleepingStimON_g0_1	0
25	1	32.5	2019-09-04_BT_BT031_sleepingStimON_g0_1	0
26	1	37.5	2019-09-04_BT_BT031_sleepingStimON_g0_1	0
27	1	42.5	2019-09-04_BT_BT031_sleepingStimON_g0_1	0
28	1	47.5	2019-09-04_BT_BT031_sleepingStimON_g0_1	0
29	1	52.5	2019-09-04_BT_BT031_sleepingStimON_g0_1	0
30	1	57.5	2019-09-04_BT_BT031_sleepingStimON_g0_1	0
31	0	62.5	2019-09-04_BT_BT031_sleepingStimON_g0_1	0
32	0	67.5	2019-09-04_BT_BT031_sleepingStimON_g0_1	0
33	0	72.5	2019-09-04_BT_BT031_sleepingStimON_g0_1	0
34	0	77.5	2019-09-04_BT_BT031_sleepingStimON_g0_1	0
35	0	82.5	2019-09-04_BT_BT031_sleepingStimON_g0_1	0
36	0	87.5	2019-09-04_BT_BT031_sleepingStimON_g0_1	0
37	0	2.5	2019-09-04_BT_BT031_sleepingStimON_g0_2	0.2
38	0	7.5	2019-09-04_BT_BT031_sleepingStimON_g0_2	0.2
39	0	12.5	2019-09-04_BT_BT031_sleepingStimON_g0_2	0
40	0	17.5	2019-09-04_BT_BT031_sleepingStimON_g0_2	0
41	0	22.5	2019-09-04_BT_BT031_sleepingStimON_g0_2	0
42	0	27.5	2019-09-04_BT_BT031_sleepingStimON_g0_2	0
43	1	32.5	2019-09-04_BT_BT031_sleepingStimON_g0_2	0
44	1	37.5	2019-09-04_BT_BT031_sleepingStimON_g0_2	0
45	1	42.5	2019-09-04_BT_BT031_sleepingStimON_g0_2	0
46	1	47.5	2019-09-04_BT_BT031_sleepingStimON_g0_2	0
47	1	52.5	2019-09-04_BT_BT031_sleepingStimON_g0_2	0
48	1	57.5	2019-09-04_BT_BT031_sleepingStimON_g0_2	0
49	0	62.5	2019-09-04_BT_BT031_sleepingStimON_g0_2	0
50	0	67.5	2019-09-04_BT_BT031_sleepingStimON_g0_2	0
51	0	72.5	2019-09-04_BT_BT031_sleepingStimON_g0_2	0
52	0	77.5	2019-09-04_BT_BT031_sleepingStimON_g0_2	0
53	0	82.5	2019-09-04_BT_BT031_sleepingStimON_g0_2	0
54	0	87.5	2019-09-04_BT_BT031_sleepingStimON_g0_2	0
55	0	2.5	2019-09-04_OS_OS031_AsleepStimON2_g0_0	0.4
56	0	7.5	2019-09-04_OS_OS031_AsleepStimON2_g0_0	0.6
57	0	12.5	2019-09-04_OS_OS031_AsleepStimON2_g0_0	0.6
58	0	17.5	2019-09-04_OS_OS031_AsleepStimON2_g0_0	0
59	0	22.5	2019-09-04_OS_OS031_AsleepStimON2_g0_0	0
60	0	27.5	2019-09-04_OS_OS031_AsleepStimON2_g0_0	0
61	1	32.5	2019-09-04_OS_OS031_AsleepStimON2_g0_0	0
62	1	37.5	2019-09-04_OS_OS031_AsleepStimON2_g0_0	0
63	1	42.5	2019-09-04_OS_OS031_AsleepStimON2_g0_0	0
64	1	47.5	2019-09-04_OS_OS031_AsleepStimON2_g0_0	0
65	1	52.5	2019-09-04_OS_OS031_AsleepStimON2_g0_0	0
66	1	57.5	2019-09-04_OS_OS031_AsleepStimON2_g0_0	0
67	0	62.5	2019-09-04_OS_OS031_AsleepStimON2_g0_0	0.2
68	0	67.5	2019-09-04_OS_OS031_AsleepStimON2_g0_0	0.8
69	0	72.5	2019-09-04_OS_OS031_AsleepStimON2_g0_0	0.2
70	0	77.5	2019-09-04_OS_OS031_AsleepStimON2_g0_0	0
71	0	82.5	2019-09-04_OS_OS031_AsleepStimON2_g0_0	0
72	0	87.5	2019-09-04_OS_OS031_AsleepStimON2_g0_0	0.2
73	0	2.5	2019-09-04_OS_OS031_AsleepStimON2_g0_1	0.2
74	0	7.5	2019-09-04_OS_OS031_AsleepStimON2_g0_1	0.2
75	0	12.5	2019-09-04_OS_OS031_AsleepStimON2_g0_1	0.2
76	0	17.5	2019-09-04_OS_OS031_AsleepStimON2_g0_1	0.4
77	0	22.5	2019-09-04_OS_OS031_AsleepStimON2_g0_1	0.4
78	0	27.5	2019-09-04_OS_OS031_AsleepStimON2_g0_1	0.2
79	1	32.5	2019-09-04_OS_OS031_AsleepStimON2_g0_1	0
80	1	37.5	2019-09-04_OS_OS031_AsleepStimON2_g0_1	0
81	1	42.5	2019-09-04_OS_OS031_AsleepStimON2_g0_1	0
82	1	47.5	2019-09-04_OS_OS031_AsleepStimON2_g0_1	0
83	1	52.5	2019-09-04_OS_OS031_AsleepStimON2_g0_1	0
84	1	57.5	2019-09-04_OS_OS031_AsleepStimON2_g0_1	0
85	0	62.5	2019-09-04_OS_OS031_AsleepStimON2_g0_1	0.2
86	0	67.5	2019-09-04_OS_OS031_AsleepStimON2_g0_1	0
87	0	72.5	2019-09-04_OS_OS031_AsleepStimON2_g0_1	0
88	0	77.5	2019-09-04_OS_OS031_AsleepStimON2_g0_1	0
89	0	82.5	2019-09-04_OS_OS031_AsleepStimON2_g0_1	0
90	0	87.5	2019-09-04_OS_OS031_AsleepStimON2_g0_1	0
91	0	2.5	2019-09-04_OS_OS031_AsleepStimON2_g0_2	0.2
92	0	7.5	2019-09-04_OS_OS031_AsleepStimON2_g0_2	0
93	0	12.5	2019-09-04_OS_OS031_AsleepStimON2_g0_2	0.2
94	0	17.5	2019-09-04_OS_OS031_AsleepStimON2_g0_2	0
95	0	22.5	2019-09-04_OS_OS031_AsleepStimON2_g0_2	0.2
96	0	27.5	2019-09-04_OS_OS031_AsleepStimON2_g0_2	0
97	1	32.5	2019-09-04_OS_OS031_AsleepStimON2_g0_2	0
98	1	37.5	2019-09-04_OS_OS031_AsleepStimON2_g0_2	0
99	1	42.5	2019-09-04_OS_OS031_AsleepStimON2_g0_2	0
100	1	47.5	2019-09-04_OS_OS031_AsleepStimON2_g0_2	0
101	1	52.5	2019-09-04_OS_OS031_AsleepStimON2_g0_2	0
102	1	57.5	2019-09-04_OS_OS031_AsleepStimON2_g0_2	0
103	0	62.5	2019-09-04_OS_OS031_AsleepStimON2_g0_2	0.4
104	0	67.5	2019-09-04_OS_OS031_AsleepStimON2_g0_2	0
105	0	72.5	2019-09-04_OS_OS031_AsleepStimON2_g0_2	0
106	0	77.5	2019-09-04_OS_OS031_AsleepStimON2_g0_2	0
107	0	82.5	2019-09-04_OS_OS031_AsleepStimON2_g0_2	0
108	0	87.5	2019-09-04_OS_OS031_AsleepStimON2_g0_2	0
109	0	2.5	2019-09-04_OS_OS031_AsleepStimON2_g0_3	0.8
110	0	7.5	2019-09-04_OS_OS031_AsleepStimON2_g0_3	0
111	0	12.5	2019-09-04_OS_OS031_AsleepStimON2_g0_3	0
112	0	17.5	2019-09-04_OS_OS031_AsleepStimON2_g0_3	0
113	0	22.5	2019-09-04_OS_OS031_AsleepStimON2_g0_3	0
114	0	27.5	2019-09-04_OS_OS031_AsleepStimON2_g0_3	0.8
115	1	32.5	2019-09-04_OS_OS031_AsleepStimON2_g0_3	0
116	1	37.5	2019-09-04_OS_OS031_AsleepStimON2_g0_3	0
117	1	42.5	2019-09-04_OS_OS031_AsleepStimON2_g0_3	0
118	1	47.5	2019-09-04_OS_OS031_AsleepStimON2_g0_3	0
119	1	52.5	2019-09-04_OS_OS031_AsleepStimON2_g0_3	0
120	1	57.5	2019-09-04_OS_OS031_AsleepStimON2_g0_3	0
121	0	62.5	2019-09-04_OS_OS031_AsleepStimON2_g0_3	0
122	0	67.5	2019-09-04_OS_OS031_AsleepStimON2_g0_3	0.2
123	0	72.5	2019-09-04_OS_OS031_AsleepStimON2_g0_3	0
124	0	77.5	2019-09-04_OS_OS031_AsleepStimON2_g0_3	0.2
125	0	82.5	2019-09-04_OS_OS031_AsleepStimON2_g0_3	0.2
126	0	87.5	2019-09-04_OS_OS031_AsleepStimON2_g0_3	1
127	0	2.5	2019-09-04_OS_OS031_AsleepStimON2_g0_4	0.2
128	0	7.5	2019-09-04_OS_OS031_AsleepStimON2_g0_4	0.2
129	0	12.5	2019-09-04_OS_OS031_AsleepStimON2_g0_4	0.2
130	0	17.5	2019-09-04_OS_OS031_AsleepStimON2_g0_4	0.4
131	0	22.5	2019-09-04_OS_OS031_AsleepStimON2_g0_4	0.2
132	0	27.5	2019-09-04_OS_OS031_AsleepStimON2_g0_4	0.2
133	1	32.5	2019-09-04_OS_OS031_AsleepStimON2_g0_4	0
134	1	37.5	2019-09-04_OS_OS031_AsleepStimON2_g0_4	0.2
135	1	42.5	2019-09-04_OS_OS031_AsleepStimON2_g0_4	0
136	1	47.5	2019-09-04_OS_OS031_AsleepStimON2_g0_4	0
137	1	52.5	2019-09-04_OS_OS031_AsleepStimON2_g0_4	0
138	1	57.5	2019-09-04_OS_OS031_AsleepStimON2_g0_4	0
139	0	62.5	2019-09-04_OS_OS031_AsleepStimON2_g0_4	0
140	0	67.5	2019-09-04_OS_OS031_AsleepStimON2_g0_4	0.4
141	0	72.5	2019-09-04_OS_OS031_AsleepStimON2_g0_4	0.6
142	0	77.5	2019-09-04_OS_OS031_AsleepStimON2_g0_4	0
143	0	82.5	2019-09-04_OS_OS031_AsleepStimON2_g0_4	0.2
144	0	87.5	2019-09-04_OS_OS031_AsleepStimON2_g0_4	0.2
145	0	2.5	2019-09-04_OS_OS031_AsleepStimON3_g0_0	0
146	0	7.5	2019-09-04_OS_OS031_AsleepStimON3_g0_0	0
147	0	12.5	2019-09-04_OS_OS031_AsleepStimON3_g0_0	0
148	0	17.5	2019-09-04_OS_OS031_AsleepStimON3_g0_0	0.4
149	0	22.5	2019-09-04_OS_OS031_AsleepStimON3_g0_0	0.2
150	0	27.5	2019-09-04_OS_OS031_AsleepStimON3_g0_0	0.6
151	1	32.5	2019-09-04_OS_OS031_AsleepStimON3_g0_0	0
152	1	37.5	2019-09-04_OS_OS031_AsleepStimON3_g0_0	0
153	1	42.5	2019-09-04_OS_OS031_AsleepStimON3_g0_0	0
154	1	47.5	2019-09-04_OS_OS031_AsleepStimON3_g0_0	0
155	1	52.5	2019-09-04_OS_OS031_AsleepStimON3_g0_0	0
156	1	57.5	2019-09-04_OS_OS031_AsleepStimON3_g0_0	0
157	0	62.5	2019-09-04_OS_OS031_AsleepStimON3_g0_0	0
158	0	67.5	2019-09-04_OS_OS031_AsleepStimON3_g0_0	0
159	0	72.5	2019-09-04_OS_OS031_AsleepStimON3_g0_0	0
160	0	77.5	2019-09-04_OS_OS031_AsleepStimON3_g0_0	0
161	0	82.5	2019-09-04_OS_OS031_AsleepStimON3_g0_0	0
162	0	87.5	2019-09-04_OS_OS031_AsleepStimON3_g0_0	0
163	0	2.5	2019-09-04_OS_OS031_AsleepStimON3_g0_1	0
164	0	7.5	2019-09-04_OS_OS031_AsleepStimON3_g0_1	0
165	0	12.5	2019-09-04_OS_OS031_AsleepStimON3_g0_1	0
166	0	17.5	2019-09-04_OS_OS031_AsleepStimON3_g0_1	0
167	0	22.5	2019-09-04_OS_OS031_AsleepStimON3_g0_1	0
168	0	27.5	2019-09-04_OS_OS031_AsleepStimON3_g0_1	0
169	1	32.5	2019-09-04_OS_OS031_AsleepStimON3_g0_1	0
170	1	37.5	2019-09-04_OS_OS031_AsleepStimON3_g0_1	0
171	1	42.5	2019-09-04_OS_OS031_AsleepStimON3_g0_1	0
172	1	47.5	2019-09-04_OS_OS031_AsleepStimON3_g0_1	0
173	1	52.5	2019-09-04_OS_OS031_AsleepStimON3_g0_1	0
174	1	57.5	2019-09-04_OS_OS031_AsleepStimON3_g0_1	0
175	0	62.5	2019-09-04_OS_OS031_AsleepStimON3_g0_1	0.2
176	0	67.5	2019-09-04_OS_OS031_AsleepStimON3_g0_1	0
177	0	72.5	2019-09-04_OS_OS031_AsleepStimON3_g0_1	0
178	0	77.5	2019-09-04_OS_OS031_AsleepStimON3_g0_1	0
179	0	82.5	2019-09-04_OS_OS031_AsleepStimON3_g0_1	0
180	0	87.5	2019-09-04_OS_OS031_AsleepStimON3_g0_1	0
181	0	2.5	2019-09-04_OS_OS031_AsleepStimON3_g0_2	0.2
182	0	7.5	2019-09-04_OS_OS031_AsleepStimON3_g0_2	0.4
183	0	12.5	2019-09-04_OS_OS031_AsleepStimON3_g0_2	0
184	0	17.5	2019-09-04_OS_OS031_AsleepStimON3_g0_2	0
185	0	22.5	2019-09-04_OS_OS031_AsleepStimON3_g0_2	0
186	0	27.5	2019-09-04_OS_OS031_AsleepStimON3_g0_2	0
187	1	32.5	2019-09-04_OS_OS031_AsleepStimON3_g0_2	0
188	1	37.5	2019-09-04_OS_OS031_AsleepStimON3_g0_2	0
189	1	42.5	2019-09-04_OS_OS031_AsleepStimON3_g0_2	0
190	1	47.5	2019-09-04_OS_OS031_AsleepStimON3_g0_2	0
191	1	52.5	2019-09-04_OS_OS031_AsleepStimON3_g0_2	0
192	1	57.5	2019-09-04_OS_OS031_AsleepStimON3_g0_2	0
193	0	62.5	2019-09-04_OS_OS031_AsleepStimON3_g0_2	0
194	0	67.5	2019-09-04_OS_OS031_AsleepStimON3_g0_2	0
195	0	72.5	2019-09-04_OS_OS031_AsleepStimON3_g0_2	0
196	0	77.5	2019-09-04_OS_OS031_AsleepStimON3_g0_2	0
197	0	82.5	2019-09-04_OS_OS031_AsleepStimON3_g0_2	0
198	0	87.5	2019-09-04_OS_OS031_AsleepStimON3_g0_2	0
199	0	2.5	2019-09-04_OS_OS031_AsleepStimON3_g0_3	0
200	0	7.5	2019-09-04_OS_OS031_AsleepStimON3_g0_3	0
201	0	12.5	2019-09-04_OS_OS031_AsleepStimON3_g0_3	0
202	0	17.5	2019-09-04_OS_OS031_AsleepStimON3_g0_3	0
203	0	22.5	2019-09-04_OS_OS031_AsleepStimON3_g0_3	0.2
204	0	27.5	2019-09-04_OS_OS031_AsleepStimON3_g0_3	0
205	1	32.5	2019-09-04_OS_OS031_AsleepStimON3_g0_3	0
206	1	37.5	2019-09-04_OS_OS031_AsleepStimON3_g0_3	0
207	1	42.5	2019-09-04_OS_OS031_AsleepStimON3_g0_3	0
208	1	47.5	2019-09-04_OS_OS031_AsleepStimON3_g0_3	0
209	1	52.5	2019-09-04_OS_OS031_AsleepStimON3_g0_3	0
210	1	57.5	2019-09-04_OS_OS031_AsleepStimON3_g0_3	0
211	0	62.5	2019-09-04_OS_OS031_AsleepStimON3_g0_3	0
212	0	67.5	2019-09-04_OS_OS031_AsleepStimON3_g0_3	0
213	0	72.5	2019-09-04_OS_OS031_AsleepStimON3_g0_3	0
214	0	77.5	2019-09-04_OS_OS031_AsleepStimON3_g0_3	0
215	0	82.5	2019-09-04_OS_OS031_AsleepStimON3_g0_3	0
216	0	87.5	2019-09-04_OS_OS031_AsleepStimON3_g0_3	0
217	0	2.5	2019-09-04_OS_OS031_AsleepStimON3_g0_4	0
218	0	7.5	2019-09-04_OS_OS031_AsleepStimON3_g0_4	0
219	0	12.5	2019-09-04_OS_OS031_AsleepStimON3_g0_4	0
220	0	17.5	2019-09-04_OS_OS031_AsleepStimON3_g0_4	0
221	0	22.5	2019-09-04_OS_OS031_AsleepStimON3_g0_4	0
222	0	27.5	2019-09-04_OS_OS031_AsleepStimON3_g0_4	0.2
223	1	32.5	2019-09-04_OS_OS031_AsleepStimON3_g0_4	0
224	1	37.5	2019-09-04_OS_OS031_AsleepStimON3_g0_4	0
225	1	42.5	2019-09-04_OS_OS031_AsleepStimON3_g0_4	0
226	1	47.5	2019-09-04_OS_OS031_AsleepStimON3_g0_4	0
227	1	52.5	2019-09-04_OS_OS031_AsleepStimON3_g0_4	0
228	1	57.5	2019-09-04_OS_OS031_AsleepStimON3_g0_4	0
229	0	62.5	2019-09-04_OS_OS031_AsleepStimON3_g0_4	0
230	0	67.5	2019-09-04_OS_OS031_AsleepStimON3_g0_4	0
231	0	72.5	2019-09-04_OS_OS031_AsleepStimON3_g0_4	0
232	0	77.5	2019-09-04_OS_OS031_AsleepStimON3_g0_4	0.4
233	0	82.5	2019-09-04_OS_OS031_AsleepStimON3_g0_4	0
234	0	87.5	2019-09-04_OS_OS031_AsleepStimON3_g0_4	0
235	0	2.5	2019-09-04_OS_OS031-AsleepStimON_g0_0	0
236	0	7.5	2019-09-04_OS_OS031-AsleepStimON_g0_0	0
237	0	12.5	2019-09-04_OS_OS031-AsleepStimON_g0_0	0.2
238	0	17.5	2019-09-04_OS_OS031-AsleepStimON_g0_0	0
239	0	22.5	2019-09-04_OS_OS031-AsleepStimON_g0_0	0.2
240	0	27.5	2019-09-04_OS_OS031-AsleepStimON_g0_0	0
241	1	32.5	2019-09-04_OS_OS031-AsleepStimON_g0_0	0
242	1	37.5	2019-09-04_OS_OS031-AsleepStimON_g0_0	0
243	1	42.5	2019-09-04_OS_OS031-AsleepStimON_g0_0	0
244	1	47.5	2019-09-04_OS_OS031-AsleepStimON_g0_0	0
245	1	52.5	2019-09-04_OS_OS031-AsleepStimON_g0_0	0
246	1	57.5	2019-09-04_OS_OS031-AsleepStimON_g0_0	0
247	0	62.5	2019-09-04_OS_OS031-AsleepStimON_g0_0	0
248	0	67.5	2019-09-04_OS_OS031-AsleepStimON_g0_0	0.8
249	0	72.5	2019-09-04_OS_OS031-AsleepStimON_g0_0	0
250	0	77.5	2019-09-04_OS_OS031-AsleepStimON_g0_0	0.6
251	0	82.5	2019-09-04_OS_OS031-AsleepStimON_g0_0	0.2
252	0	87.5	2019-09-04_OS_OS031-AsleepStimON_g0_0	0.4
253	0	2.5	2019-09-04_OS_OS031-AsleepStimON_g0_2	0
254	0	7.5	2019-09-04_OS_OS031-AsleepStimON_g0_2	0
255	0	12.5	2019-09-04_OS_OS031-AsleepStimON_g0_2	0
256	0	17.5	2019-09-04_OS_OS031-AsleepStimON_g0_2	0
257	0	22.5	2019-09-04_OS_OS031-AsleepStimON_g0_2	0
258	0	27.5	2019-09-04_OS_OS031-AsleepStimON_g0_2	0
259	1	32.5	2019-09-04_OS_OS031-AsleepStimON_g0_2	0
260	1	37.5	2019-09-04_OS_OS031-AsleepStimON_g0_2	0
261	1	42.5	2019-09-04_OS_OS031-AsleepStimON_g0_2	0
262	1	47.5	2019-09-04_OS_OS031-AsleepStimON_g0_2	0
263	1	52.5	2019-09-04_OS_OS031-AsleepStimON_g0_2	0
264	1	57.5	2019-09-04_OS_OS031-AsleepStimON_g0_2	0
265	0	62.5	2019-09-04_OS_OS031-AsleepStimON_g0_2	0.2
266	0	67.5	2019-09-04_OS_OS031-AsleepStimON_g0_2	0.4
267	0	72.5	2019-09-04_OS_OS031-AsleepStimON_g0_2	0.6
268	0	77.5	2019-09-04_OS_OS031-AsleepStimON_g0_2	0
269	0	82.5	2019-09-04_OS_OS031-AsleepStimON_g0_2	0.8
270	0	87.5	2019-09-04_OS_OS031-AsleepStimON_g0_2	0.2
271	0	2.5	2019-09-04_OS_OS031-AsleepStimON_g0_3	0.2
272	0	7.5	2019-09-04_OS_OS031-AsleepStimON_g0_3	0.2
273	0	12.5	2019-09-04_OS_OS031-AsleepStimON_g0_3	0.4
274	0	17.5	2019-09-04_OS_OS031-AsleepStimON_g0_3	1
275	0	22.5	2019-09-04_OS_OS031-AsleepStimON_g0_3	0.2
276	0	27.5	2019-09-04_OS_OS031-AsleepStimON_g0_3	0.2
277	1	32.5	2019-09-04_OS_OS031-AsleepStimON_g0_3	0
278	1	37.5	2019-09-04_OS_OS031-AsleepStimON_g0_3	0
279	1	42.5	2019-09-04_OS_OS031-AsleepStimON_g0_3	0
280	1	47.5	2019-09-04_OS_OS031-AsleepStimON_g0_3	0
281	1	52.5	2019-09-04_OS_OS031-AsleepStimON_g0_3	0
282	1	57.5	2019-09-04_OS_OS031-AsleepStimON_g0_3	0
283	0	62.5	2019-09-04_OS_OS031-AsleepStimON_g0_3	0
284	0	67.5	2019-09-04_OS_OS031-AsleepStimON_g0_3	0
285	0	72.5	2019-09-04_OS_OS031-AsleepStimON_g0_3	0
286	0	77.5	2019-09-04_OS_OS031-AsleepStimON_g0_3	0
287	0	82.5	2019-09-04_OS_OS031-AsleepStimON_g0_3	0
288	0	87.5	2019-09-04_OS_OS031-AsleepStimON_g0_3	0.6
289	0	2.5	2019-09-04_OS_OS031-AsleepStimON_g0_4	0.2
290	0	7.5	2019-09-04_OS_OS031-AsleepStimON_g0_4	0
291	0	12.5	2019-09-04_OS_OS031-AsleepStimON_g0_4	0.2
292	0	17.5	2019-09-04_OS_OS031-AsleepStimON_g0_4	0
293	0	22.5	2019-09-04_OS_OS031-AsleepStimON_g0_4	0.2
294	0	27.5	2019-09-04_OS_OS031-AsleepStimON_g0_4	0.6
295	1	32.5	2019-09-04_OS_OS031-AsleepStimON_g0_4	0
296	1	37.5	2019-09-04_OS_OS031-AsleepStimON_g0_4	0
297	1	42.5	2019-09-04_OS_OS031-AsleepStimON_g0_4	0
298	1	47.5	2019-09-04_OS_OS031-AsleepStimON_g0_4	0
299	1	52.5	2019-09-04_OS_OS031-AsleepStimON_g0_4	0
300	1	57.5	2019-09-04_OS_OS031-AsleepStimON_g0_4	0
301	0	62.5	2019-09-04_OS_OS031-AsleepStimON_g0_4	0.4
302	0	67.5	2019-09-04_OS_OS031-AsleepStimON_g0_4	0
303	0	72.5	2019-09-04_OS_OS031-AsleepStimON_g0_4	0
304	0	77.5	2019-09-04_OS_OS031-AsleepStimON_g0_4	0
305	0	82.5	2019-09-04_OS_OS031-AsleepStimON_g0_4	0
306	0	87.5	2019-09-04_OS_OS031-AsleepStimON_g0_4	0.2
307	0	2.5	2019-11-07_GD_GD_sleep_1_g0_0	0
308	0	7.5	2019-11-07_GD_GD_sleep_1_g0_0	0
309	0	12.5	2019-11-07_GD_GD_sleep_1_g0_0	0.2
310	0	17.5	2019-11-07_GD_GD_sleep_1_g0_0	0.2
311	0	22.5	2019-11-07_GD_GD_sleep_1_g0_0	0
312	0	27.5	2019-11-07_GD_GD_sleep_1_g0_0	0
313	1	32.5	2019-11-07_GD_GD_sleep_1_g0_0	0
314	1	37.5	2019-11-07_GD_GD_sleep_1_g0_0	0
315	1	42.5	2019-11-07_GD_GD_sleep_1_g0_0	0
316	1	47.5	2019-11-07_GD_GD_sleep_1_g0_0	0
317	1	52.5	2019-11-07_GD_GD_sleep_1_g0_0	0
318	1	57.5	2019-11-07_GD_GD_sleep_1_g0_0	0.4
319	0	62.5	2019-11-07_GD_GD_sleep_1_g0_0	0.4
320	0	67.5	2019-11-07_GD_GD_sleep_1_g0_0	0
321	0	72.5	2019-11-07_GD_GD_sleep_1_g0_0	0
322	0	77.5	2019-11-07_GD_GD_sleep_1_g0_0	0
323	0	82.5	2019-11-07_GD_GD_sleep_1_g0_0	0
324	0	87.5	2019-11-07_GD_GD_sleep_1_g0_0	0.2
325	0	2.5	2019-11-07_GD_GD_sleep_1_g0_1	0.4
326	0	7.5	2019-11-07_GD_GD_sleep_1_g0_1	0.2
327	0	12.5	2019-11-07_GD_GD_sleep_1_g0_1	0.2
328	0	17.5	2019-11-07_GD_GD_sleep_1_g0_1	0
329	0	22.5	2019-11-07_GD_GD_sleep_1_g0_1	0.2
330	0	27.5	2019-11-07_GD_GD_sleep_1_g0_1	0.2
331	1	32.5	2019-11-07_GD_GD_sleep_1_g0_1	0
332	1	37.5	2019-11-07_GD_GD_sleep_1_g0_1	0
333	1	42.5	2019-11-07_GD_GD_sleep_1_g0_1	0
334	1	47.5	2019-11-07_GD_GD_sleep_1_g0_1	0
335	1	52.5	2019-11-07_GD_GD_sleep_1_g0_1	0
336	1	57.5	2019-11-07_GD_GD_sleep_1_g0_1	0
337	0	62.5	2019-11-07_GD_GD_sleep_1_g0_1	0.6
338	0	67.5	2019-11-07_GD_GD_sleep_1_g0_1	0.2
339	0	72.5	2019-11-07_GD_GD_sleep_1_g0_1	0
340	0	77.5	2019-11-07_GD_GD_sleep_1_g0_1	0
341	0	82.5	2019-11-07_GD_GD_sleep_1_g0_1	0
342	0	87.5	2019-11-07_GD_GD_sleep_1_g0_1	0
343	0	2.5	2019-11-07_GD_GD_sleep_1_g0_2	0
344	0	7.5	2019-11-07_GD_GD_sleep_1_g0_2	0.2
345	0	12.5	2019-11-07_GD_GD_sleep_1_g0_2	0
346	0	17.5	2019-11-07_GD_GD_sleep_1_g0_2	0
347	0	22.5	2019-11-07_GD_GD_sleep_1_g0_2	0
348	0	27.5	2019-11-07_GD_GD_sleep_1_g0_2	0.4
349	1	32.5	2019-11-07_GD_GD_sleep_1_g0_2	0.2
350	1	37.5	2019-11-07_GD_GD_sleep_1_g0_2	0
351	1	42.5	2019-11-07_GD_GD_sleep_1_g0_2	0.6
352	1	47.5	2019-11-07_GD_GD_sleep_1_g0_2	0
353	1	52.5	2019-11-07_GD_GD_sleep_1_g0_2	0
354	1	57.5	2019-11-07_GD_GD_sleep_1_g0_2	0
355	0	62.5	2019-11-07_GD_GD_sleep_1_g0_2	0.8
356	0	67.5	2019-11-07_GD_GD_sleep_1_g0_2	0.2
357	0	72.5	2019-11-07_GD_GD_sleep_1_g0_2	0.4
358	0	77.5	2019-11-07_GD_GD_sleep_1_g0_2	0.6
359	0	82.5	2019-11-07_GD_GD_sleep_1_g0_2	0
360	0	87.5	2019-11-07_GD_GD_sleep_1_g0_2	0.2
361	0	2.5	2019-11-07_GD_GD_sleep_1_g0_3	0.2
362	0	7.5	2019-11-07_GD_GD_sleep_1_g0_3	0
363	0	12.5	2019-11-07_GD_GD_sleep_1_g0_3	0
364	0	17.5	2019-11-07_GD_GD_sleep_1_g0_3	0.2
365	0	22.5	2019-11-07_GD_GD_sleep_1_g0_3	0
366	0	27.5	2019-11-07_GD_GD_sleep_1_g0_3	0
367	1	32.5	2019-11-07_GD_GD_sleep_1_g0_3	0
368	1	37.5	2019-11-07_GD_GD_sleep_1_g0_3	0
369	1	42.5	2019-11-07_GD_GD_sleep_1_g0_3	0
370	1	47.5	2019-11-07_GD_GD_sleep_1_g0_3	0.8
371	1	52.5	2019-11-07_GD_GD_sleep_1_g0_3	0.4
372	1	57.5	2019-11-07_GD_GD_sleep_1_g0_3	0
373	0	62.5	2019-11-07_GD_GD_sleep_1_g0_3	0
374	0	67.5	2019-11-07_GD_GD_sleep_1_g0_3	0.4
375	0	72.5	2019-11-07_GD_GD_sleep_1_g0_3	0.2
376	0	77.5	2019-11-07_GD_GD_sleep_1_g0_3	0.2
377	0	82.5	2019-11-07_GD_GD_sleep_1_g0_3	0
378	0	87.5	2019-11-07_GD_GD_sleep_1_g0_3	0.4
379	0	2.5	2019-11-07_GD_GD_sleep_1_g0_4	0
380	0	7.5	2019-11-07_GD_GD_sleep_1_g0_4	0.2
381	0	12.5	2019-11-07_GD_GD_sleep_1_g0_4	0.4
382	0	17.5	2019-11-07_GD_GD_sleep_1_g0_4	0.4
383	0	22.5	2019-11-07_GD_GD_sleep_1_g0_4	0
384	0	27.5	2019-11-07_GD_GD_sleep_1_g0_4	0.2
385	1	32.5	2019-11-07_GD_GD_sleep_1_g0_4	0
386	1	37.5	2019-11-07_GD_GD_sleep_1_g0_4	0
387	1	42.5	2019-11-07_GD_GD_sleep_1_g0_4	0
388	1	47.5	2019-11-07_GD_GD_sleep_1_g0_4	0.2
389	1	52.5	2019-11-07_GD_GD_sleep_1_g0_4	0
390	1	57.5	2019-11-07_GD_GD_sleep_1_g0_4	0
391	0	62.5	2019-11-07_GD_GD_sleep_1_g0_4	0.2
392	0	67.5	2019-11-07_GD_GD_sleep_1_g0_4	0.2
393	0	72.5	2019-11-07_GD_GD_sleep_1_g0_4	0
394	0	77.5	2019-11-07_GD_GD_sleep_1_g0_4	0
395	0	82.5	2019-11-07_GD_GD_sleep_1_g0_4	0.2
396	0	87.5	2019-11-07_GD_GD_sleep_1_g0_4	0.2
397	0	2.5	2019-11-29_BS_BS_sleep_2_g0_0	0.2
398	0	7.5	2019-11-29_BS_BS_sleep_2_g0_0	0.2
399	0	12.5	2019-11-29_BS_BS_sleep_2_g0_0	0
400	0	17.5	2019-11-29_BS_BS_sleep_2_g0_0	0
401	0	22.5	2019-11-29_BS_BS_sleep_2_g0_0	0
402	0	27.5	2019-11-29_BS_BS_sleep_2_g0_0	0.4
403	1	32.5	2019-11-29_BS_BS_sleep_2_g0_0	0
404	1	37.5	2019-11-29_BS_BS_sleep_2_g0_0	0
405	1	42.5	2019-11-29_BS_BS_sleep_2_g0_0	0.2
406	1	47.5	2019-11-29_BS_BS_sleep_2_g0_0	0
407	1	52.5	2019-11-29_BS_BS_sleep_2_g0_0	0
408	1	57.5	2019-11-29_BS_BS_sleep_2_g0_0	0
409	0	62.5	2019-11-29_BS_BS_sleep_2_g0_0	0
410	0	67.5	2019-11-29_BS_BS_sleep_2_g0_0	0
411	0	72.5	2019-11-29_BS_BS_sleep_2_g0_0	0.2
412	0	77.5	2019-11-29_BS_BS_sleep_2_g0_0	0.2
413	0	82.5	2019-11-29_BS_BS_sleep_2_g0_0	0.2
414	0	87.5	2019-11-29_BS_BS_sleep_2_g0_0	0
415	0	2.5	2019-11-29_BS_BS_sleep_2_g0_1	0
416	0	7.5	2019-11-29_BS_BS_sleep_2_g0_1	0
417	0	12.5	2019-11-29_BS_BS_sleep_2_g0_1	0.2
418	0	17.5	2019-11-29_BS_BS_sleep_2_g0_1	0.2
419	0	22.5	2019-11-29_BS_BS_sleep_2_g0_1	0.2
420	0	27.5	2019-11-29_BS_BS_sleep_2_g0_1	0
421	1	32.5	2019-11-29_BS_BS_sleep_2_g0_1	0
422	1	37.5	2019-11-29_BS_BS_sleep_2_g0_1	0
423	1	42.5	2019-11-29_BS_BS_sleep_2_g0_1	0
424	1	47.5	2019-11-29_BS_BS_sleep_2_g0_1	0.2
425	1	52.5	2019-11-29_BS_BS_sleep_2_g0_1	0.4
426	1	57.5	2019-11-29_BS_BS_sleep_2_g0_1	0
427	0	62.5	2019-11-29_BS_BS_sleep_2_g0_1	0
428	0	67.5	2019-11-29_BS_BS_sleep_2_g0_1	0.2
429	0	72.5	2019-11-29_BS_BS_sleep_2_g0_1	0.2
430	0	77.5	2019-11-29_BS_BS_sleep_2_g0_1	0.2
431	0	82.5	2019-11-29_BS_BS_sleep_2_g0_1	0.2
432	0	87.5	2019-11-29_BS_BS_sleep_2_g0_1	0
433	0	2.5	2019-11-29_BS_BS_sleep_2_g0_2	0
434	0	7.5	2019-11-29_BS_BS_sleep_2_g0_2	0.2
435	0	12.5	2019-11-29_BS_BS_sleep_2_g0_2	0.2
436	0	17.5	2019-11-29_BS_BS_sleep_2_g0_2	0.6
437	0	22.5	2019-11-29_BS_BS_sleep_2_g0_2	0
438	0	27.5	2019-11-29_BS_BS_sleep_2_g0_2	0
439	1	32.5	2019-11-29_BS_BS_sleep_2_g0_2	0
440	1	37.5	2019-11-29_BS_BS_sleep_2_g0_2	0
441	1	42.5	2019-11-29_BS_BS_sleep_2_g0_2	0
442	1	47.5	2019-11-29_BS_BS_sleep_2_g0_2	0
443	1	52.5	2019-11-29_BS_BS_sleep_2_g0_2	0
444	1	57.5	2019-11-29_BS_BS_sleep_2_g0_2	0
445	0	62.5	2019-11-29_BS_BS_sleep_2_g0_2	0
446	0	67.5	2019-11-29_BS_BS_sleep_2_g0_2	0.4
447	0	72.5	2019-11-29_BS_BS_sleep_2_g0_2	0
448	0	77.5	2019-11-29_BS_BS_sleep_2_g0_2	0
449	0	82.5	2019-11-29_BS_BS_sleep_2_g0_2	0
450	0	87.5	2019-11-29_BS_BS_sleep_2_g0_2	0.2
451	0	2.5	2019-11-29_BS_BS_sleep_3_g0_0	0.2
452	0	7.5	2019-11-29_BS_BS_sleep_3_g0_0	0.4
453	0	12.5	2019-11-29_BS_BS_sleep_3_g0_0	0.6
454	0	17.5	2019-11-29_BS_BS_sleep_3_g0_0	0.4
455	0	22.5	2019-11-29_BS_BS_sleep_3_g0_0	0.2
456	0	27.5	2019-11-29_BS_BS_sleep_3_g0_0	0.4
457	1	32.5	2019-11-29_BS_BS_sleep_3_g0_0	0
458	1	37.5	2019-11-29_BS_BS_sleep_3_g0_0	0
459	1	42.5	2019-11-29_BS_BS_sleep_3_g0_0	0
460	1	47.5	2019-11-29_BS_BS_sleep_3_g0_0	0.2
461	1	52.5	2019-11-29_BS_BS_sleep_3_g0_0	0
462	1	57.5	2019-11-29_BS_BS_sleep_3_g0_0	0
463	0	62.5	2019-11-29_BS_BS_sleep_3_g0_0	0
464	0	67.5	2019-11-29_BS_BS_sleep_3_g0_0	0.2
465	0	72.5	2019-11-29_BS_BS_sleep_3_g0_0	0.2
466	0	77.5	2019-11-29_BS_BS_sleep_3_g0_0	0
467	0	82.5	2019-11-29_BS_BS_sleep_3_g0_0	0
468	0	87.5	2019-11-29_BS_BS_sleep_3_g0_0	0
469	0	2.5	2019-11-29_BS_BS_sleep_3_g0_1	0
470	0	7.5	2019-11-29_BS_BS_sleep_3_g0_1	0.2
471	0	12.5	2019-11-29_BS_BS_sleep_3_g0_1	0.8
472	0	17.5	2019-11-29_BS_BS_sleep_3_g0_1	0.2
473	0	22.5	2019-11-29_BS_BS_sleep_3_g0_1	0.4
474	0	27.5	2019-11-29_BS_BS_sleep_3_g0_1	1
475	1	32.5	2019-11-29_BS_BS_sleep_3_g0_1	0
476	1	37.5	2019-11-29_BS_BS_sleep_3_g0_1	0
477	1	42.5	2019-11-29_BS_BS_sleep_3_g0_1	0
478	1	47.5	2019-11-29_BS_BS_sleep_3_g0_1	0
479	1	52.5	2019-11-29_BS_BS_sleep_3_g0_1	0
480	1	57.5	2019-11-29_BS_BS_sleep_3_g0_1	0
481	0	62.5	2019-11-29_BS_BS_sleep_3_g0_1	0
482	0	67.5	2019-11-29_BS_BS_sleep_3_g0_1	0.4
483	0	72.5	2019-11-29_BS_BS_sleep_3_g0_1	0
484	0	77.5	2019-11-29_BS_BS_sleep_3_g0_1	0.4
485	0	82.5	2019-11-29_BS_BS_sleep_3_g0_1	0.4
486	0	87.5	2019-11-29_BS_BS_sleep_3_g0_1	0
487	0	2.5	2019-11-29_BS_BS_sleep_3_g0_2	0.4
488	0	7.5	2019-11-29_BS_BS_sleep_3_g0_2	0.2
489	0	12.5	2019-11-29_BS_BS_sleep_3_g0_2	0
490	0	17.5	2019-11-29_BS_BS_sleep_3_g0_2	0.2
491	0	22.5	2019-11-29_BS_BS_sleep_3_g0_2	0
492	0	27.5	2019-11-29_BS_BS_sleep_3_g0_2	0
493	1	32.5	2019-11-29_BS_BS_sleep_3_g0_2	0
494	1	37.5	2019-11-29_BS_BS_sleep_3_g0_2	0
495	1	42.5	2019-11-29_BS_BS_sleep_3_g0_2	0
496	1	47.5	2019-11-29_BS_BS_sleep_3_g0_2	0
497	1	52.5	2019-11-29_BS_BS_sleep_3_g0_2	0.4
498	1	57.5	2019-11-29_BS_BS_sleep_3_g0_2	0
499	0	62.5	2019-11-29_BS_BS_sleep_3_g0_2	0
500	0	67.5	2019-11-29_BS_BS_sleep_3_g0_2	0
501	0	72.5	2019-11-29_BS_BS_sleep_3_g0_2	0
502	0	77.5	2019-11-29_BS_BS_sleep_3_g0_2	0
503	0	82.5	2019-11-29_BS_BS_sleep_3_g0_2	0
504	0	87.5	2019-11-29_BS_BS_sleep_3_g0_2	0
505	0	2.5	2019-11-29_GD_GD_sleep_2_g0_0	0.6
506	0	7.5	2019-11-29_GD_GD_sleep_2_g0_0	0.6
507	0	12.5	2019-11-29_GD_GD_sleep_2_g0_0	0
508	0	17.5	2019-11-29_GD_GD_sleep_2_g0_0	0.2
509	0	22.5	2019-11-29_GD_GD_sleep_2_g0_0	0.4
510	0	27.5	2019-11-29_GD_GD_sleep_2_g0_0	0.4
511	1	32.5	2019-11-29_GD_GD_sleep_2_g0_0	0
512	1	37.5	2019-11-29_GD_GD_sleep_2_g0_0	0
513	1	42.5	2019-11-29_GD_GD_sleep_2_g0_0	0
514	1	47.5	2019-11-29_GD_GD_sleep_2_g0_0	0
515	1	52.5	2019-11-29_GD_GD_sleep_2_g0_0	0
516	1	57.5	2019-11-29_GD_GD_sleep_2_g0_0	0.2
517	0	62.5	2019-11-29_GD_GD_sleep_2_g0_0	0.2
518	0	67.5	2019-11-29_GD_GD_sleep_2_g0_0	0.4
519	0	72.5	2019-11-29_GD_GD_sleep_2_g0_0	0.2
520	0	77.5	2019-11-29_GD_GD_sleep_2_g0_0	0.2
521	0	82.5	2019-11-29_GD_GD_sleep_2_g0_0	0.2
522	0	87.5	2019-11-29_GD_GD_sleep_2_g0_0	0
523	0	2.5	2019-11-29_GD_GD_sleep_2_g0_1	0
524	0	7.5	2019-11-29_GD_GD_sleep_2_g0_1	0
525	0	12.5	2019-11-29_GD_GD_sleep_2_g0_1	0
526	0	17.5	2019-11-29_GD_GD_sleep_2_g0_1	0.2
527	0	22.5	2019-11-29_GD_GD_sleep_2_g0_1	0.6
528	0	27.5	2019-11-29_GD_GD_sleep_2_g0_1	0.4
529	1	32.5	2019-11-29_GD_GD_sleep_2_g0_1	0
530	1	37.5	2019-11-29_GD_GD_sleep_2_g0_1	0
531	1	42.5	2019-11-29_GD_GD_sleep_2_g0_1	0
532	1	47.5	2019-11-29_GD_GD_sleep_2_g0_1	0
533	1	52.5	2019-11-29_GD_GD_sleep_2_g0_1	0
534	1	57.5	2019-11-29_GD_GD_sleep_2_g0_1	0
535	0	62.5	2019-11-29_GD_GD_sleep_2_g0_1	0
536	0	67.5	2019-11-29_GD_GD_sleep_2_g0_1	0
537	0	72.5	2019-11-29_GD_GD_sleep_2_g0_1	0.8
538	0	77.5	2019-11-29_GD_GD_sleep_2_g0_1	0.2
539	0	82.5	2019-11-29_GD_GD_sleep_2_g0_1	0.2
540	0	87.5	2019-11-29_GD_GD_sleep_2_g0_1	0.2
541	0	2.5	2019-11-29_GD_GD_sleep_2_g0_2	0.2
542	0	7.5	2019-11-29_GD_GD_sleep_2_g0_2	0.2
543	0	12.5	2019-11-29_GD_GD_sleep_2_g0_2	0.2
544	0	17.5	2019-11-29_GD_GD_sleep_2_g0_2	0.4
545	0	22.5	2019-11-29_GD_GD_sleep_2_g0_2	0
546	0	27.5	2019-11-29_GD_GD_sleep_2_g0_2	0.2
547	1	32.5	2019-11-29_GD_GD_sleep_2_g0_2	0
548	1	37.5	2019-11-29_GD_GD_sleep_2_g0_2	0
549	1	42.5	2019-11-29_GD_GD_sleep_2_g0_2	0
550	1	47.5	2019-11-29_GD_GD_sleep_2_g0_2	0
551	1	52.5	2019-11-29_GD_GD_sleep_2_g0_2	0
552	1	57.5	2019-11-29_GD_GD_sleep_2_g0_2	0
553	0	62.5	2019-11-29_GD_GD_sleep_2_g0_2	0
554	0	67.5	2019-11-29_GD_GD_sleep_2_g0_2	0.4
555	0	72.5	2019-11-29_GD_GD_sleep_2_g0_2	0
556	0	77.5	2019-11-29_GD_GD_sleep_2_g0_2	0
557	0	82.5	2019-11-29_GD_GD_sleep_2_g0_2	0
558	0	87.5	2019-11-29_GD_GD_sleep_2_g0_2	0
559	0	2.5	2019-11-29_GD_GD_sleep_3_g0_0	0
560	0	7.5	2019-11-29_GD_GD_sleep_3_g0_0	0.4
561	0	12.5	2019-11-29_GD_GD_sleep_3_g0_0	0.2
562	0	17.5	2019-11-29_GD_GD_sleep_3_g0_0	0
563	0	22.5	2019-11-29_GD_GD_sleep_3_g0_0	0
564	0	27.5	2019-11-29_GD_GD_sleep_3_g0_0	0
565	1	32.5	2019-11-29_GD_GD_sleep_3_g0_0	0
566	1	37.5	2019-11-29_GD_GD_sleep_3_g0_0	0
567	1	42.5	2019-11-29_GD_GD_sleep_3_g0_0	0
568	1	47.5	2019-11-29_GD_GD_sleep_3_g0_0	0
569	1	52.5	2019-11-29_GD_GD_sleep_3_g0_0	0
570	1	57.5	2019-11-29_GD_GD_sleep_3_g0_0	0
571	0	62.5	2019-11-29_GD_GD_sleep_3_g0_0	0.4
572	0	67.5	2019-11-29_GD_GD_sleep_3_g0_0	0.6
573	0	72.5	2019-11-29_GD_GD_sleep_3_g0_0	0
574	0	77.5	2019-11-29_GD_GD_sleep_3_g0_0	0.4
575	0	82.5	2019-11-29_GD_GD_sleep_3_g0_0	0
576	0	87.5	2019-11-29_GD_GD_sleep_3_g0_0	0
577	0	2.5	2019-11-29_GD_GD_sleep_3_g0_1	0.2
578	0	7.5	2019-11-29_GD_GD_sleep_3_g0_1	0
579	0	12.5	2019-11-29_GD_GD_sleep_3_g0_1	0
580	0	17.5	2019-11-29_GD_GD_sleep_3_g0_1	0
581	0	22.5	2019-11-29_GD_GD_sleep_3_g0_1	0
582	0	27.5	2019-11-29_GD_GD_sleep_3_g0_1	0
583	1	32.5	2019-11-29_GD_GD_sleep_3_g0_1	0
584	1	37.5	2019-11-29_GD_GD_sleep_3_g0_1	0
585	1	42.5	2019-11-29_GD_GD_sleep_3_g0_1	0
586	1	47.5	2019-11-29_GD_GD_sleep_3_g0_1	0
587	1	52.5	2019-11-29_GD_GD_sleep_3_g0_1	0
588	1	57.5	2019-11-29_GD_GD_sleep_3_g0_1	0
589	0	62.5	2019-11-29_GD_GD_sleep_3_g0_1	0.2
590	0	67.5	2019-11-29_GD_GD_sleep_3_g0_1	0
591	0	72.5	2019-11-29_GD_GD_sleep_3_g0_1	0
592	0	77.5	2019-11-29_GD_GD_sleep_3_g0_1	0.4
593	0	82.5	2019-11-29_GD_GD_sleep_3_g0_1	0.2
594	0	87.5	2019-11-29_GD_GD_sleep_3_g0_1	0.2
595	0	2.5	2019-11-29_GD_GD_sleep_3_g0_2	0.2
596	0	7.5	2019-11-29_GD_GD_sleep_3_g0_2	0
597	0	12.5	2019-11-29_GD_GD_sleep_3_g0_2	0
598	0	17.5	2019-11-29_GD_GD_sleep_3_g0_2	0.8
599	0	22.5	2019-11-29_GD_GD_sleep_3_g0_2	0
600	0	27.5	2019-11-29_GD_GD_sleep_3_g0_2	0.4
601	1	32.5	2019-11-29_GD_GD_sleep_3_g0_2	0
602	1	37.5	2019-11-29_GD_GD_sleep_3_g0_2	0
603	1	42.5	2019-11-29_GD_GD_sleep_3_g0_2	0
604	1	47.5	2019-11-29_GD_GD_sleep_3_g0_2	0
605	1	52.5	2019-11-29_GD_GD_sleep_3_g0_2	0.2
606	1	57.5	2019-11-29_GD_GD_sleep_3_g0_2	0
607	0	62.5	2019-11-29_GD_GD_sleep_3_g0_2	0.4
608	0	67.5	2019-11-29_GD_GD_sleep_3_g0_2	0
609	0	72.5	2019-11-29_GD_GD_sleep_3_g0_2	0.2
610	0	77.5	2019-11-29_GD_GD_sleep_3_g0_2	0
611	0	82.5	2019-11-29_GD_GD_sleep_3_g0_2	0.2
612	0	87.5	2019-11-29_GD_GD_sleep_3_g0_2	0
613	0	2.5	2019-11-29_GD_GD_sleep_4_g0_0	0.4
614	0	7.5	2019-11-29_GD_GD_sleep_4_g0_0	0
615	0	12.5	2019-11-29_GD_GD_sleep_4_g0_0	0.4
616	0	17.5	2019-11-29_GD_GD_sleep_4_g0_0	0.4
617	0	22.5	2019-11-29_GD_GD_sleep_4_g0_0	0.6
618	0	27.5	2019-11-29_GD_GD_sleep_4_g0_0	0.6
619	1	32.5	2019-11-29_GD_GD_sleep_4_g0_0	0.2
620	1	37.5	2019-11-29_GD_GD_sleep_4_g0_0	0
621	1	42.5	2019-11-29_GD_GD_sleep_4_g0_0	0
622	1	47.5	2019-11-29_GD_GD_sleep_4_g0_0	0
623	1	52.5	2019-11-29_GD_GD_sleep_4_g0_0	0
624	1	57.5	2019-11-29_GD_GD_sleep_4_g0_0	0
625	0	62.5	2019-11-29_GD_GD_sleep_4_g0_0	0.6
626	0	67.5	2019-11-29_GD_GD_sleep_4_g0_0	0.2
627	0	72.5	2019-11-29_GD_GD_sleep_4_g0_0	0.4
628	0	77.5	2019-11-29_GD_GD_sleep_4_g0_0	0
629	0	82.5	2019-11-29_GD_GD_sleep_4_g0_0	0.4
630	0	87.5	2019-11-29_GD_GD_sleep_4_g0_0	0
631	0	2.5	2019-11-29_GD_GD_sleep_4_g0_1	0
632	0	7.5	2019-11-29_GD_GD_sleep_4_g0_1	0
633	0	12.5	2019-11-29_GD_GD_sleep_4_g0_1	0
634	0	17.5	2019-11-29_GD_GD_sleep_4_g0_1	0
635	0	22.5	2019-11-29_GD_GD_sleep_4_g0_1	0
636	0	27.5	2019-11-29_GD_GD_sleep_4_g0_1	0
637	1	32.5	2019-11-29_GD_GD_sleep_4_g0_1	0
638	1	37.5	2019-11-29_GD_GD_sleep_4_g0_1	0
639	1	42.5	2019-11-29_GD_GD_sleep_4_g0_1	0
640	1	47.5	2019-11-29_GD_GD_sleep_4_g0_1	0
641	1	52.5	2019-11-29_GD_GD_sleep_4_g0_1	0
642	1	57.5	2019-11-29_GD_GD_sleep_4_g0_1	0
643	0	62.5	2019-11-29_GD_GD_sleep_4_g0_1	0
644	0	67.5	2019-11-29_GD_GD_sleep_4_g0_1	0
645	0	72.5	2019-11-29_GD_GD_sleep_4_g0_1	0.4
646	0	77.5	2019-11-29_GD_GD_sleep_4_g0_1	0.4
647	0	82.5	2019-11-29_GD_GD_sleep_4_g0_1	0
648	0	87.5	2019-11-29_GD_GD_sleep_4_g0_1	0.2
649	0	2.5	2019-11-29_GD_GD_sleep_4_g0_2	0.2
650	0	7.5	2019-11-29_GD_GD_sleep_4_g0_2	0.4
651	0	12.5	2019-11-29_GD_GD_sleep_4_g0_2	0
652	0	17.5	2019-11-29_GD_GD_sleep_4_g0_2	0.4
653	0	22.5	2019-11-29_GD_GD_sleep_4_g0_2	0
654	0	27.5	2019-11-29_GD_GD_sleep_4_g0_2	0.2
655	1	32.5	2019-11-29_GD_GD_sleep_4_g0_2	0
656	1	37.5	2019-11-29_GD_GD_sleep_4_g0_2	0
657	1	42.5	2019-11-29_GD_GD_sleep_4_g0_2	0
658	1	47.5	2019-11-29_GD_GD_sleep_4_g0_2	0
659	1	52.5	2019-11-29_GD_GD_sleep_4_g0_2	0
660	1	57.5	2019-11-29_GD_GD_sleep_4_g0_2	0
661	0	62.5	2019-11-29_GD_GD_sleep_4_g0_2	0.6
662	0	67.5	2019-11-29_GD_GD_sleep_4_g0_2	0.2
663	0	72.5	2019-11-29_GD_GD_sleep_4_g0_2	0.4
664	0	77.5	2019-11-29_GD_GD_sleep_4_g0_2	0
665	0	82.5	2019-11-29_GD_GD_sleep_4_g0_2	0
666	0	87.5	2019-11-29_GD_GD_sleep_4_g0_2	0
667	0	2.5	2019-12-03_PT_PT_sleep_1_g0_0	0.2
668	0	7.5	2019-12-03_PT_PT_sleep_1_g0_0	0
669	0	12.5	2019-12-03_PT_PT_sleep_1_g0_0	0.2
670	0	17.5	2019-12-03_PT_PT_sleep_1_g0_0	0
671	0	22.5	2019-12-03_PT_PT_sleep_1_g0_0	0.4
672	0	27.5	2019-12-03_PT_PT_sleep_1_g0_0	0.2
673	1	32.5	2019-12-03_PT_PT_sleep_1_g0_0	0
674	1	37.5	2019-12-03_PT_PT_sleep_1_g0_0	0
675	1	42.5	2019-12-03_PT_PT_sleep_1_g0_0	0.2
676	1	47.5	2019-12-03_PT_PT_sleep_1_g0_0	0.2
677	1	52.5	2019-12-03_PT_PT_sleep_1_g0_0	0.4
678	1	57.5	2019-12-03_PT_PT_sleep_1_g0_0	0.2
679	0	62.5	2019-12-03_PT_PT_sleep_1_g0_0	0.6
680	0	67.5	2019-12-03_PT_PT_sleep_1_g0_0	0.6
681	0	72.5	2019-12-03_PT_PT_sleep_1_g0_0	0.8
682	0	77.5	2019-12-03_PT_PT_sleep_1_g0_0	0
683	0	82.5	2019-12-03_PT_PT_sleep_1_g0_0	0.6
684	0	87.5	2019-12-03_PT_PT_sleep_1_g0_0	0
685	0	2.5	2019-12-03_PT_PT_sleep_1_g0_1	0.6
686	0	7.5	2019-12-03_PT_PT_sleep_1_g0_1	0.4
687	0	12.5	2019-12-03_PT_PT_sleep_1_g0_1	0.8
688	0	17.5	2019-12-03_PT_PT_sleep_1_g0_1	0.2
689	0	22.5	2019-12-03_PT_PT_sleep_1_g0_1	0.2
690	0	27.5	2019-12-03_PT_PT_sleep_1_g0_1	0.2
691	1	32.5	2019-12-03_PT_PT_sleep_1_g0_1	0
692	1	37.5	2019-12-03_PT_PT_sleep_1_g0_1	0
693	1	42.5	2019-12-03_PT_PT_sleep_1_g0_1	0
694	1	47.5	2019-12-03_PT_PT_sleep_1_g0_1	0
695	1	52.5	2019-12-03_PT_PT_sleep_1_g0_1	0
696	1	57.5	2019-12-03_PT_PT_sleep_1_g0_1	0.4
697	0	62.5	2019-12-03_PT_PT_sleep_1_g0_1	0
698	0	67.5	2019-12-03_PT_PT_sleep_1_g0_1	0.8
699	0	72.5	2019-12-03_PT_PT_sleep_1_g0_1	0.2
700	0	77.5	2019-12-03_PT_PT_sleep_1_g0_1	0
701	0	82.5	2019-12-03_PT_PT_sleep_1_g0_1	0
702	0	87.5	2019-12-03_PT_PT_sleep_1_g0_1	0.4
703	0	2.5	2019-12-03_PT_PT_sleep_1_g0_2	0.2
704	0	7.5	2019-12-03_PT_PT_sleep_1_g0_2	0.2
705	0	12.5	2019-12-03_PT_PT_sleep_1_g0_2	0.6
706	0	17.5	2019-12-03_PT_PT_sleep_1_g0_2	0.6
707	0	22.5	2019-12-03_PT_PT_sleep_1_g0_2	0.2
708	0	27.5	2019-12-03_PT_PT_sleep_1_g0_2	0.6
709	1	32.5	2019-12-03_PT_PT_sleep_1_g0_2	0
710	1	37.5	2019-12-03_PT_PT_sleep_1_g0_2	1
711	1	42.5	2019-12-03_PT_PT_sleep_1_g0_2	0.2
712	1	47.5	2019-12-03_PT_PT_sleep_1_g0_2	0
713	1	52.5	2019-12-03_PT_PT_sleep_1_g0_2	0
714	1	57.5	2019-12-03_PT_PT_sleep_1_g0_2	0
715	0	62.5	2019-12-03_PT_PT_sleep_1_g0_2	0
716	0	67.5	2019-12-03_PT_PT_sleep_1_g0_2	0.4
717	0	72.5	2019-12-03_PT_PT_sleep_1_g0_2	0
718	0	77.5	2019-12-03_PT_PT_sleep_1_g0_2	0.4
719	0	82.5	2019-12-03_PT_PT_sleep_1_g0_2	0.6
720	0	87.5	2019-12-03_PT_PT_sleep_1_g0_2	1
721	0	2.5	2019-12-03_PT_PT_sleep_2_g0_0	0.8
722	0	7.5	2019-12-03_PT_PT_sleep_2_g0_0	0
723	0	12.5	2019-12-03_PT_PT_sleep_2_g0_0	1
724	0	17.5	2019-12-03_PT_PT_sleep_2_g0_0	0
725	0	22.5	2019-12-03_PT_PT_sleep_2_g0_0	0.4
726	0	27.5	2019-12-03_PT_PT_sleep_2_g0_0	0.2
727	1	32.5	2019-12-03_PT_PT_sleep_2_g0_0	0
728	1	37.5	2019-12-03_PT_PT_sleep_2_g0_0	0
729	1	42.5	2019-12-03_PT_PT_sleep_2_g0_0	0
730	1	47.5	2019-12-03_PT_PT_sleep_2_g0_0	0.4
731	1	52.5	2019-12-03_PT_PT_sleep_2_g0_0	0
732	1	57.5	2019-12-03_PT_PT_sleep_2_g0_0	0
733	0	62.5	2019-12-03_PT_PT_sleep_2_g0_0	0
734	0	67.5	2019-12-03_PT_PT_sleep_2_g0_0	0
735	0	72.5	2019-12-03_PT_PT_sleep_2_g0_0	0.6
736	0	77.5	2019-12-03_PT_PT_sleep_2_g0_0	0
737	0	82.5	2019-12-03_PT_PT_sleep_2_g0_0	0.8
738	0	87.5	2019-12-03_PT_PT_sleep_2_g0_0	0.4
739	0	2.5	2019-12-03_PT_PT_sleep_2_g0_1	0.6
740	0	7.5	2019-12-03_PT_PT_sleep_2_g0_1	0.4
741	0	12.5	2019-12-03_PT_PT_sleep_2_g0_1	0.4
742	0	17.5	2019-12-03_PT_PT_sleep_2_g0_1	0.2
743	0	22.5	2019-12-03_PT_PT_sleep_2_g0_1	0
744	0	27.5	2019-12-03_PT_PT_sleep_2_g0_1	0.6
745	1	32.5	2019-12-03_PT_PT_sleep_2_g0_1	0
746	1	37.5	2019-12-03_PT_PT_sleep_2_g0_1	0
747	1	42.5	2019-12-03_PT_PT_sleep_2_g0_1	0
748	1	47.5	2019-12-03_PT_PT_sleep_2_g0_1	0
749	1	52.5	2019-12-03_PT_PT_sleep_2_g0_1	0.2
750	1	57.5	2019-12-03_PT_PT_sleep_2_g0_1	0
751	0	62.5	2019-12-03_PT_PT_sleep_2_g0_1	0.2
752	0	67.5	2019-12-03_PT_PT_sleep_2_g0_1	0.2
753	0	72.5	2019-12-03_PT_PT_sleep_2_g0_1	0.6
754	0	77.5	2019-12-03_PT_PT_sleep_2_g0_1	0
755	0	82.5	2019-12-03_PT_PT_sleep_2_g0_1	0
756	0	87.5	2019-12-03_PT_PT_sleep_2_g0_1	1.4
757	0	2.5	2019-12-03_PT_PT_sleep_2_g0_2	0
758	0	7.5	2019-12-03_PT_PT_sleep_2_g0_2	0
759	0	12.5	2019-12-03_PT_PT_sleep_2_g0_2	0
760	0	17.5	2019-12-03_PT_PT_sleep_2_g0_2	0
761	0	22.5	2019-12-03_PT_PT_sleep_2_g0_2	0
762	0	27.5	2019-12-03_PT_PT_sleep_2_g0_2	0
763	1	32.5	2019-12-03_PT_PT_sleep_2_g0_2	0
764	1	37.5	2019-12-03_PT_PT_sleep_2_g0_2	0
765	1	42.5	2019-12-03_PT_PT_sleep_2_g0_2	0
766	1	47.5	2019-12-03_PT_PT_sleep_2_g0_2	0
767	1	52.5	2019-12-03_PT_PT_sleep_2_g0_2	0
768	1	57.5	2019-12-03_PT_PT_sleep_2_g0_2	0.4
769	0	62.5	2019-12-03_PT_PT_sleep_2_g0_2	0.4
770	0	67.5	2019-12-03_PT_PT_sleep_2_g0_2	0.2
771	0	72.5	2019-12-03_PT_PT_sleep_2_g0_2	0.2
772	0	77.5	2019-12-03_PT_PT_sleep_2_g0_2	0.2
773	0	82.5	2019-12-03_PT_PT_sleep_2_g0_2	0.4
774	0	87.5	2019-12-03_PT_PT_sleep_2_g0_2	0
775	0	2.5	2019-12-03_PT_PT_sleep_3_g0_0	1.8
776	0	7.5	2019-12-03_PT_PT_sleep_3_g0_0	0
777	0	12.5	2019-12-03_PT_PT_sleep_3_g0_0	0.4
778	0	17.5	2019-12-03_PT_PT_sleep_3_g0_0	0.2
779	0	22.5	2019-12-03_PT_PT_sleep_3_g0_0	0.8
780	0	27.5	2019-12-03_PT_PT_sleep_3_g0_0	0.8
781	1	32.5	2019-12-03_PT_PT_sleep_3_g0_0	0
782	1	37.5	2019-12-03_PT_PT_sleep_3_g0_0	0
783	1	42.5	2019-12-03_PT_PT_sleep_3_g0_0	0
784	1	47.5	2019-12-03_PT_PT_sleep_3_g0_0	0.2
785	1	52.5	2019-12-03_PT_PT_sleep_3_g0_0	0
786	1	57.5	2019-12-03_PT_PT_sleep_3_g0_0	0
787	0	62.5	2019-12-03_PT_PT_sleep_3_g0_0	0
788	0	67.5	2019-12-03_PT_PT_sleep_3_g0_0	0.2
789	0	72.5	2019-12-03_PT_PT_sleep_3_g0_0	0
790	0	77.5	2019-12-03_PT_PT_sleep_3_g0_0	0.4
791	0	82.5	2019-12-03_PT_PT_sleep_3_g0_0	0
792	0	87.5	2019-12-03_PT_PT_sleep_3_g0_0	0.2
793	0	2.5	2019-12-03_PT_PT_sleep_3_g0_1	0.6
794	0	7.5	2019-12-03_PT_PT_sleep_3_g0_1	0.2
795	0	12.5	2019-12-03_PT_PT_sleep_3_g0_1	0
796	0	17.5	2019-12-03_PT_PT_sleep_3_g0_1	0.4
797	0	22.5	2019-12-03_PT_PT_sleep_3_g0_1	0.2
798	0	27.5	2019-12-03_PT_PT_sleep_3_g0_1	0
799	1	32.5	2019-12-03_PT_PT_sleep_3_g0_1	0
800	1	37.5	2019-12-03_PT_PT_sleep_3_g0_1	0
801	1	42.5	2019-12-03_PT_PT_sleep_3_g0_1	0.4
802	1	47.5	2019-12-03_PT_PT_sleep_3_g0_1	0
803	1	52.5	2019-12-03_PT_PT_sleep_3_g0_1	0
804	1	57.5	2019-12-03_PT_PT_sleep_3_g0_1	0
805	0	62.5	2019-12-03_PT_PT_sleep_3_g0_1	0
806	0	67.5	2019-12-03_PT_PT_sleep_3_g0_1	0.8
807	0	72.5	2019-12-03_PT_PT_sleep_3_g0_1	0.2
808	0	77.5	2019-12-03_PT_PT_sleep_3_g0_1	0
809	0	82.5	2019-12-03_PT_PT_sleep_3_g0_1	0
810	0	87.5	2019-12-03_PT_PT_sleep_3_g0_1	0
811	0	2.5	2019-12-03_PT_PT_sleep_3_g0_2	0
812	0	7.5	2019-12-03_PT_PT_sleep_3_g0_2	0
813	0	12.5	2019-12-03_PT_PT_sleep_3_g0_2	0
814	0	17.5	2019-12-03_PT_PT_sleep_3_g0_2	0
815	0	22.5	2019-12-03_PT_PT_sleep_3_g0_2	0
816	0	27.5	2019-12-03_PT_PT_sleep_3_g0_2	0
817	1	32.5	2019-12-03_PT_PT_sleep_3_g0_2	0
818	1	37.5	2019-12-03_PT_PT_sleep_3_g0_2	0
819	1	42.5	2019-12-03_PT_PT_sleep_3_g0_2	0
820	1	47.5	2019-12-03_PT_PT_sleep_3_g0_2	0
821	1	52.5	2019-12-03_PT_PT_sleep_3_g0_2	0
822	1	57.5	2019-12-03_PT_PT_sleep_3_g0_2	0
823	0	62.5	2019-12-03_PT_PT_sleep_3_g0_2	0.2
824	0	67.5	2019-12-03_PT_PT_sleep_3_g0_2	0
825	0	72.5	2019-12-03_PT_PT_sleep_3_g0_2	0
826	0	77.5	2019-12-03_PT_PT_sleep_3_g0_2	0
827	0	82.5	2019-12-03_PT_PT_sleep_3_g0_2	0
828	0	87.5	2019-12-03_PT_PT_sleep_3_g0_2	0
829	0	2.5	2020-07-24_BD_BlackDot_Asleep_StimON2_0	0.2
830	0	7.5	2020-07-24_BD_BlackDot_Asleep_StimON2_0	0.4
831	0	12.5	2020-07-24_BD_BlackDot_Asleep_StimON2_0	0.4
832	0	17.5	2020-07-24_BD_BlackDot_Asleep_StimON2_0	0.6
833	0	22.5	2020-07-24_BD_BlackDot_Asleep_StimON2_0	1
834	0	27.5	2020-07-24_BD_BlackDot_Asleep_StimON2_0	0.2
835	1	32.5	2020-07-24_BD_BlackDot_Asleep_StimON2_0	0
836	1	37.5	2020-07-24_BD_BlackDot_Asleep_StimON2_0	0
837	1	42.5	2020-07-24_BD_BlackDot_Asleep_StimON2_0	0
838	1	47.5	2020-07-24_BD_BlackDot_Asleep_StimON2_0	0
839	1	52.5	2020-07-24_BD_BlackDot_Asleep_StimON2_0	0
840	1	57.5	2020-07-24_BD_BlackDot_Asleep_StimON2_0	0
841	0	62.5	2020-07-24_BD_BlackDot_Asleep_StimON2_0	0
842	0	67.5	2020-07-24_BD_BlackDot_Asleep_StimON2_0	0
843	0	72.5	2020-07-24_BD_BlackDot_Asleep_StimON2_0	0
844	0	77.5	2020-07-24_BD_BlackDot_Asleep_StimON2_0	0
845	0	82.5	2020-07-24_BD_BlackDot_Asleep_StimON2_0	0
846	0	87.5	2020-07-24_BD_BlackDot_Asleep_StimON2_0	0
847	0	2.5	2020-07-24_BD_BlackDot_Asleep_StimON2_1	0
848	0	7.5	2020-07-24_BD_BlackDot_Asleep_StimON2_1	0
849	0	12.5	2020-07-24_BD_BlackDot_Asleep_StimON2_1	0
850	0	17.5	2020-07-24_BD_BlackDot_Asleep_StimON2_1	0
851	0	22.5	2020-07-24_BD_BlackDot_Asleep_StimON2_1	0.2
852	0	27.5	2020-07-24_BD_BlackDot_Asleep_StimON2_1	0
853	1	32.5	2020-07-24_BD_BlackDot_Asleep_StimON2_1	0
854	1	37.5	2020-07-24_BD_BlackDot_Asleep_StimON2_1	0
855	1	42.5	2020-07-24_BD_BlackDot_Asleep_StimON2_1	0
856	1	47.5	2020-07-24_BD_BlackDot_Asleep_StimON2_1	0
857	1	52.5	2020-07-24_BD_BlackDot_Asleep_StimON2_1	0
858	1	57.5	2020-07-24_BD_BlackDot_Asleep_StimON2_1	0
859	0	62.5	2020-07-24_BD_BlackDot_Asleep_StimON2_1	0
860	0	67.5	2020-07-24_BD_BlackDot_Asleep_StimON2_1	0
861	0	72.5	2020-07-24_BD_BlackDot_Asleep_StimON2_1	0
862	0	77.5	2020-07-24_BD_BlackDot_Asleep_StimON2_1	0.2
863	0	82.5	2020-07-24_BD_BlackDot_Asleep_StimON2_1	0
864	0	87.5	2020-07-24_BD_BlackDot_Asleep_StimON2_1	0
865	0	2.5	2020-07-24_BD_BlackDot_Asleep_StimON2_2	0
866	0	7.5	2020-07-24_BD_BlackDot_Asleep_StimON2_2	0
867	0	12.5	2020-07-24_BD_BlackDot_Asleep_StimON2_2	0
868	0	17.5	2020-07-24_BD_BlackDot_Asleep_StimON2_2	0
869	0	22.5	2020-07-24_BD_BlackDot_Asleep_StimON2_2	0
870	0	27.5	2020-07-24_BD_BlackDot_Asleep_StimON2_2	0
871	1	32.5	2020-07-24_BD_BlackDot_Asleep_StimON2_2	0
872	1	37.5	2020-07-24_BD_BlackDot_Asleep_StimON2_2	0
873	1	42.5	2020-07-24_BD_BlackDot_Asleep_StimON2_2	0
874	1	47.5	2020-07-24_BD_BlackDot_Asleep_StimON2_2	0
875	1	52.5	2020-07-24_BD_BlackDot_Asleep_StimON2_2	0
876	1	57.5	2020-07-24_BD_BlackDot_Asleep_StimON2_2	0
877	0	62.5	2020-07-24_BD_BlackDot_Asleep_StimON2_2	0
878	0	67.5	2020-07-24_BD_BlackDot_Asleep_StimON2_2	0.4
879	0	72.5	2020-07-24_BD_BlackDot_Asleep_StimON2_2	0.4
880	0	77.5	2020-07-24_BD_BlackDot_Asleep_StimON2_2	0.8
881	0	82.5	2020-07-24_BD_BlackDot_Asleep_StimON2_2	1.2
882	0	87.5	2020-07-24_BD_BlackDot_Asleep_StimON2_2	0.4
883	0	2.5	2020-07-24_BD_BlackDot_Asleep_StimON2_3	0.4
884	0	7.5	2020-07-24_BD_BlackDot_Asleep_StimON2_3	0.2
885	0	12.5	2020-07-24_BD_BlackDot_Asleep_StimON2_3	0.2
886	0	17.5	2020-07-24_BD_BlackDot_Asleep_StimON2_3	0
887	0	22.5	2020-07-24_BD_BlackDot_Asleep_StimON2_3	0.6
888	0	27.5	2020-07-24_BD_BlackDot_Asleep_StimON2_3	0.2
889	1	32.5	2020-07-24_BD_BlackDot_Asleep_StimON2_3	0
890	1	37.5	2020-07-24_BD_BlackDot_Asleep_StimON2_3	0
891	1	42.5	2020-07-24_BD_BlackDot_Asleep_StimON2_3	0
892	1	47.5	2020-07-24_BD_BlackDot_Asleep_StimON2_3	0
893	1	52.5	2020-07-24_BD_BlackDot_Asleep_StimON2_3	0.2
894	1	57.5	2020-07-24_BD_BlackDot_Asleep_StimON2_3	0
895	0	62.5	2020-07-24_BD_BlackDot_Asleep_StimON2_3	0.2
896	0	67.5	2020-07-24_BD_BlackDot_Asleep_StimON2_3	0.2
897	0	72.5	2020-07-24_BD_BlackDot_Asleep_StimON2_3	0
898	0	77.5	2020-07-24_BD_BlackDot_Asleep_StimON2_3	0
899	0	82.5	2020-07-24_BD_BlackDot_Asleep_StimON2_3	0.8
900	0	87.5	2020-07-24_BD_BlackDot_Asleep_StimON2_3	0.4
901	0	2.5	2020-07-24_BD_BlackDot_Asleep_StimON2_4	0.4
902	0	7.5	2020-07-24_BD_BlackDot_Asleep_StimON2_4	0.8
903	0	12.5	2020-07-24_BD_BlackDot_Asleep_StimON2_4	0.4
904	0	17.5	2020-07-24_BD_BlackDot_Asleep_StimON2_4	0
905	0	22.5	2020-07-24_BD_BlackDot_Asleep_StimON2_4	0
906	0	27.5	2020-07-24_BD_BlackDot_Asleep_StimON2_4	0.4
907	1	32.5	2020-07-24_BD_BlackDot_Asleep_StimON2_4	0
908	1	37.5	2020-07-24_BD_BlackDot_Asleep_StimON2_4	0
909	1	42.5	2020-07-24_BD_BlackDot_Asleep_StimON2_4	0.2
910	1	47.5	2020-07-24_BD_BlackDot_Asleep_StimON2_4	0
911	1	52.5	2020-07-24_BD_BlackDot_Asleep_StimON2_4	0
912	1	57.5	2020-07-24_BD_BlackDot_Asleep_StimON2_4	0.4
913	0	62.5	2020-07-24_BD_BlackDot_Asleep_StimON2_4	0
914	0	67.5	2020-07-24_BD_BlackDot_Asleep_StimON2_4	0
915	0	72.5	2020-07-24_BD_BlackDot_Asleep_StimON2_4	0
916	0	77.5	2020-07-24_BD_BlackDot_Asleep_StimON2_4	0.2
917	0	82.5	2020-07-24_BD_BlackDot_Asleep_StimON2_4	0.6
918	0	87.5	2020-07-24_BD_BlackDot_Asleep_StimON2_4	0
919	0	2.5	2020-07-24_BD_BlackDot_Asleep_StimON3_0	0
920	0	7.5	2020-07-24_BD_BlackDot_Asleep_StimON3_0	0.4
921	0	12.5	2020-07-24_BD_BlackDot_Asleep_StimON3_0	0.4
922	0	17.5	2020-07-24_BD_BlackDot_Asleep_StimON3_0	0.4
923	0	22.5	2020-07-24_BD_BlackDot_Asleep_StimON3_0	0
924	0	27.5	2020-07-24_BD_BlackDot_Asleep_StimON3_0	0
925	1	32.5	2020-07-24_BD_BlackDot_Asleep_StimON3_0	0
926	1	37.5	2020-07-24_BD_BlackDot_Asleep_StimON3_0	0
927	1	42.5	2020-07-24_BD_BlackDot_Asleep_StimON3_0	0
928	1	47.5	2020-07-24_BD_BlackDot_Asleep_StimON3_0	0
929	1	52.5	2020-07-24_BD_BlackDot_Asleep_StimON3_0	0
930	1	57.5	2020-07-24_BD_BlackDot_Asleep_StimON3_0	0
931	0	62.5	2020-07-24_BD_BlackDot_Asleep_StimON3_0	0
932	0	67.5	2020-07-24_BD_BlackDot_Asleep_StimON3_0	0
933	0	72.5	2020-07-24_BD_BlackDot_Asleep_StimON3_0	0
934	0	77.5	2020-07-24_BD_BlackDot_Asleep_StimON3_0	0.2
935	0	82.5	2020-07-24_BD_BlackDot_Asleep_StimON3_0	0.4
936	0	87.5	2020-07-24_BD_BlackDot_Asleep_StimON3_0	0.6
937	0	2.5	2020-07-24_BD_BlackDot_Asleep_StimON3_1	0
938	0	7.5	2020-07-24_BD_BlackDot_Asleep_StimON3_1	0
939	0	12.5	2020-07-24_BD_BlackDot_Asleep_StimON3_1	0.4
940	0	17.5	2020-07-24_BD_BlackDot_Asleep_StimON3_1	0.2
941	0	22.5	2020-07-24_BD_BlackDot_Asleep_StimON3_1	0.2
942	0	27.5	2020-07-24_BD_BlackDot_Asleep_StimON3_1	0.4
943	1	32.5	2020-07-24_BD_BlackDot_Asleep_StimON3_1	0
944	1	37.5	2020-07-24_BD_BlackDot_Asleep_StimON3_1	0
945	1	42.5	2020-07-24_BD_BlackDot_Asleep_StimON3_1	0
946	1	47.5	2020-07-24_BD_BlackDot_Asleep_StimON3_1	0
947	1	52.5	2020-07-24_BD_BlackDot_Asleep_StimON3_1	0
948	1	57.5	2020-07-24_BD_BlackDot_Asleep_StimON3_1	0
949	0	62.5	2020-07-24_BD_BlackDot_Asleep_StimON3_1	0
950	0	67.5	2020-07-24_BD_BlackDot_Asleep_StimON3_1	0.6
951	0	72.5	2020-07-24_BD_BlackDot_Asleep_StimON3_1	0
952	0	77.5	2020-07-24_BD_BlackDot_Asleep_StimON3_1	0.8
953	0	82.5	2020-07-24_BD_BlackDot_Asleep_StimON3_1	0.2
954	0	87.5	2020-07-24_BD_BlackDot_Asleep_StimON3_1	0
955	0	2.5	2020-07-24_BD_BlackDot_Asleep_StimON3_2	0
956	0	7.5	2020-07-24_BD_BlackDot_Asleep_StimON3_2	0.6
957	0	12.5	2020-07-24_BD_BlackDot_Asleep_StimON3_2	0
958	0	17.5	2020-07-24_BD_BlackDot_Asleep_StimON3_2	0
959	0	22.5	2020-07-24_BD_BlackDot_Asleep_StimON3_2	0.2
960	0	27.5	2020-07-24_BD_BlackDot_Asleep_StimON3_2	0
961	1	32.5	2020-07-24_BD_BlackDot_Asleep_StimON3_2	0
962	1	37.5	2020-07-24_BD_BlackDot_Asleep_StimON3_2	0
963	1	42.5	2020-07-24_BD_BlackDot_Asleep_StimON3_2	0.2
964	1	47.5	2020-07-24_BD_BlackDot_Asleep_StimON3_2	0
965	1	52.5	2020-07-24_BD_BlackDot_Asleep_StimON3_2	0
966	1	57.5	2020-07-24_BD_BlackDot_Asleep_StimON3_2	0
967	0	62.5	2020-07-24_BD_BlackDot_Asleep_StimON3_2	0
968	0	67.5	2020-07-24_BD_BlackDot_Asleep_StimON3_2	0.4
969	0	72.5	2020-07-24_BD_BlackDot_Asleep_StimON3_2	0
970	0	77.5	2020-07-24_BD_BlackDot_Asleep_StimON3_2	0.2
971	0	82.5	2020-07-24_BD_BlackDot_Asleep_StimON3_2	0
972	0	87.5	2020-07-24_BD_BlackDot_Asleep_StimON3_2	0.2
973	0	2.5	2020-07-24_BD_BlackDot_Asleep_StimON3_3	0.2
974	0	7.5	2020-07-24_BD_BlackDot_Asleep_StimON3_3	0.2
975	0	12.5	2020-07-24_BD_BlackDot_Asleep_StimON3_3	0
976	0	17.5	2020-07-24_BD_BlackDot_Asleep_StimON3_3	0.2
977	0	22.5	2020-07-24_BD_BlackDot_Asleep_StimON3_3	0.2
978	0	27.5	2020-07-24_BD_BlackDot_Asleep_StimON3_3	0.2
979	1	32.5	2020-07-24_BD_BlackDot_Asleep_StimON3_3	0
980	1	37.5	2020-07-24_BD_BlackDot_Asleep_StimON3_3	0
981	1	42.5	2020-07-24_BD_BlackDot_Asleep_StimON3_3	0
982	1	47.5	2020-07-24_BD_BlackDot_Asleep_StimON3_3	0
983	1	52.5	2020-07-24_BD_BlackDot_Asleep_StimON3_3	0
984	1	57.5	2020-07-24_BD_BlackDot_Asleep_StimON3_3	0
985	0	62.5	2020-07-24_BD_BlackDot_Asleep_StimON3_3	0.2
986	0	67.5	2020-07-24_BD_BlackDot_Asleep_StimON3_3	0
987	0	72.5	2020-07-24_BD_BlackDot_Asleep_StimON3_3	0.6
988	0	77.5	2020-07-24_BD_BlackDot_Asleep_StimON3_3	0.2
989	0	82.5	2020-07-24_BD_BlackDot_Asleep_StimON3_3	0.6
990	0	87.5	2020-07-24_BD_BlackDot_Asleep_StimON3_3	0
991	0	2.5	2020-07-24_BD_BlackDot_Asleep_StimON3_4	0.4
992	0	7.5	2020-07-24_BD_BlackDot_Asleep_StimON3_4	0
993	0	12.5	2020-07-24_BD_BlackDot_Asleep_StimON3_4	0
994	0	17.5	2020-07-24_BD_BlackDot_Asleep_StimON3_4	0.2
995	0	22.5	2020-07-24_BD_BlackDot_Asleep_StimON3_4	0
996	0	27.5	2020-07-24_BD_BlackDot_Asleep_StimON3_4	0.4
997	1	32.5	2020-07-24_BD_BlackDot_Asleep_StimON3_4	0
998	1	37.5	2020-07-24_BD_BlackDot_Asleep_StimON3_4	0
999	1	42.5	2020-07-24_BD_BlackDot_Asleep_StimON3_4	0
1000	1	47.5	2020-07-24_BD_BlackDot_Asleep_StimON3_4	0
1001	1	52.5	2020-07-24_BD_BlackDot_Asleep_StimON3_4	0
1002	1	57.5	2020-07-24_BD_BlackDot_Asleep_StimON3_4	0.2
1003	0	62.5	2020-07-24_BD_BlackDot_Asleep_StimON3_4	0.4
1004	0	67.5	2020-07-24_BD_BlackDot_Asleep_StimON3_4	0.4
1005	0	72.5	2020-07-24_BD_BlackDot_Asleep_StimON3_4	0.2
1006	0	77.5	2020-07-24_BD_BlackDot_Asleep_StimON3_4	0
1007	0	82.5	2020-07-24_BD_BlackDot_Asleep_StimON3_4	0.2
1008	0	87.5	2020-07-24_BD_BlackDot_Asleep_StimON3_4	0
1009	0	2.5	2020-07-24_BD_BlackDot_Asleep_StimON4_0	0
1010	0	7.5	2020-07-24_BD_BlackDot_Asleep_StimON4_0	0.4
1011	0	12.5	2020-07-24_BD_BlackDot_Asleep_StimON4_0	0.6
1012	0	17.5	2020-07-24_BD_BlackDot_Asleep_StimON4_0	0
1013	0	22.5	2020-07-24_BD_BlackDot_Asleep_StimON4_0	0
1014	0	27.5	2020-07-24_BD_BlackDot_Asleep_StimON4_0	0.2
1015	1	32.5	2020-07-24_BD_BlackDot_Asleep_StimON4_0	0
1016	1	37.5	2020-07-24_BD_BlackDot_Asleep_StimON4_0	0
1017	1	42.5	2020-07-24_BD_BlackDot_Asleep_StimON4_0	0
1018	1	47.5	2020-07-24_BD_BlackDot_Asleep_StimON4_0	0.2
1019	1	52.5	2020-07-24_BD_BlackDot_Asleep_StimON4_0	0.2
1020	1	57.5	2020-07-24_BD_BlackDot_Asleep_StimON4_0	0.4
1021	0	62.5	2020-07-24_BD_BlackDot_Asleep_StimON4_0	0.4
1022	0	67.5	2020-07-24_BD_BlackDot_Asleep_StimON4_0	0
1023	0	72.5	2020-07-24_BD_BlackDot_Asleep_StimON4_0	0.6
1024	0	77.5	2020-07-24_BD_BlackDot_Asleep_StimON4_0	0
1025	0	82.5	2020-07-24_BD_BlackDot_Asleep_StimON4_0	0
1026	0	87.5	2020-07-24_BD_BlackDot_Asleep_StimON4_0	0.4
1027	0	2.5	2020-07-24_BD_BlackDot_Asleep_StimON4_1	0.2
1028	0	7.5	2020-07-24_BD_BlackDot_Asleep_StimON4_1	0.4
1029	0	12.5	2020-07-24_BD_BlackDot_Asleep_StimON4_1	0.2
1030	0	17.5	2020-07-24_BD_BlackDot_Asleep_StimON4_1	0
1031	0	22.5	2020-07-24_BD_BlackDot_Asleep_StimON4_1	0
1032	0	27.5	2020-07-24_BD_BlackDot_Asleep_StimON4_1	0.2
1033	1	32.5	2020-07-24_BD_BlackDot_Asleep_StimON4_1	0.2
1034	1	37.5	2020-07-24_BD_BlackDot_Asleep_StimON4_1	0
1035	1	42.5	2020-07-24_BD_BlackDot_Asleep_StimON4_1	0
1036	1	47.5	2020-07-24_BD_BlackDot_Asleep_StimON4_1	0.4
1037	1	52.5	2020-07-24_BD_BlackDot_Asleep_StimON4_1	0.2
1038	1	57.5	2020-07-24_BD_BlackDot_Asleep_StimON4_1	0.2
1039	0	62.5	2020-07-24_BD_BlackDot_Asleep_StimON4_1	0.2
1040	0	67.5	2020-07-24_BD_BlackDot_Asleep_StimON4_1	0.2
1041	0	72.5	2020-07-24_BD_BlackDot_Asleep_StimON4_1	0.4
1042	0	77.5	2020-07-24_BD_BlackDot_Asleep_StimON4_1	0
1043	0	82.5	2020-07-24_BD_BlackDot_Asleep_StimON4_1	0
1044	0	87.5	2020-07-24_BD_BlackDot_Asleep_StimON4_1	0
1045	0	2.5	2020-07-24_BD_BlackDot_Asleep_StimON4_2	0.2
1046	0	7.5	2020-07-24_BD_BlackDot_Asleep_StimON4_2	0.4
1047	0	12.5	2020-07-24_BD_BlackDot_Asleep_StimON4_2	0.2
1048	0	17.5	2020-07-24_BD_BlackDot_Asleep_StimON4_2	0.2
1049	0	22.5	2020-07-24_BD_BlackDot_Asleep_StimON4_2	0.2
1050	0	27.5	2020-07-24_BD_BlackDot_Asleep_StimON4_2	0.4
1051	1	32.5	2020-07-24_BD_BlackDot_Asleep_StimON4_2	0.2
1052	1	37.5	2020-07-24_BD_BlackDot_Asleep_StimON4_2	0
1053	1	42.5	2020-07-24_BD_BlackDot_Asleep_StimON4_2	0
1054	1	47.5	2020-07-24_BD_BlackDot_Asleep_StimON4_2	0.2
1055	1	52.5	2020-07-24_BD_BlackDot_Asleep_StimON4_2	0.4
1056	1	57.5	2020-07-24_BD_BlackDot_Asleep_StimON4_2	0.2
1057	0	62.5	2020-07-24_BD_BlackDot_Asleep_StimON4_2	0.2
1058	0	67.5	2020-07-24_BD_BlackDot_Asleep_StimON4_2	0.2
1059	0	72.5	2020-07-24_BD_BlackDot_Asleep_StimON4_2	0.8
1060	0	77.5	2020-07-24_BD_BlackDot_Asleep_StimON4_2	0
1061	0	82.5	2020-07-24_BD_BlackDot_Asleep_StimON4_2	0
1062	0	87.5	2020-07-24_BD_BlackDot_Asleep_StimON4_2	0.2
1063	0	2.5	2020-07-24_BD_BlackDot_Asleep_StimON4_3	0
1064	0	7.5	2020-07-24_BD_BlackDot_Asleep_StimON4_3	0.2
1065	0	12.5	2020-07-24_BD_BlackDot_Asleep_StimON4_3	0.4
1066	0	17.5	2020-07-24_BD_BlackDot_Asleep_StimON4_3	0
1067	0	22.5	2020-07-24_BD_BlackDot_Asleep_StimON4_3	0.8
1068	0	27.5	2020-07-24_BD_BlackDot_Asleep_StimON4_3	0.2
1069	1	32.5	2020-07-24_BD_BlackDot_Asleep_StimON4_3	0
1070	1	37.5	2020-07-24_BD_BlackDot_Asleep_StimON4_3	0
1071	1	42.5	2020-07-24_BD_BlackDot_Asleep_StimON4_3	0
1072	1	47.5	2020-07-24_BD_BlackDot_Asleep_StimON4_3	0
1073	1	52.5	2020-07-24_BD_BlackDot_Asleep_StimON4_3	0
1074	1	57.5	2020-07-24_BD_BlackDot_Asleep_StimON4_3	0
1075	0	62.5	2020-07-24_BD_BlackDot_Asleep_StimON4_3	0
1076	0	67.5	2020-07-24_BD_BlackDot_Asleep_StimON4_3	0
1077	0	72.5	2020-07-24_BD_BlackDot_Asleep_StimON4_3	0
1078	0	77.5	2020-07-24_BD_BlackDot_Asleep_StimON4_3	0
1079	0	82.5	2020-07-24_BD_BlackDot_Asleep_StimON4_3	0.2
1080	0	87.5	2020-07-24_BD_BlackDot_Asleep_StimON4_3	0
1081	0	2.5	2020-07-24_BD_BlackDot_Asleep_StimON4_4	0
1082	0	7.5	2020-07-24_BD_BlackDot_Asleep_StimON4_4	0
1083	0	12.5	2020-07-24_BD_BlackDot_Asleep_StimON4_4	0
1084	0	17.5	2020-07-24_BD_BlackDot_Asleep_StimON4_4	0
1085	0	22.5	2020-07-24_BD_BlackDot_Asleep_StimON4_4	0
1086	0	27.5	2020-07-24_BD_BlackDot_Asleep_StimON4_4	0
1087	1	32.5	2020-07-24_BD_BlackDot_Asleep_StimON4_4	0
1088	1	37.5	2020-07-24_BD_BlackDot_Asleep_StimON4_4	0
1089	1	42.5	2020-07-24_BD_BlackDot_Asleep_StimON4_4	0
1090	1	47.5	2020-07-24_BD_BlackDot_Asleep_StimON4_4	0
1091	1	52.5	2020-07-24_BD_BlackDot_Asleep_StimON4_4	0
1092	1	57.5	2020-07-24_BD_BlackDot_Asleep_StimON4_4	0
1093	0	62.5	2020-07-24_BD_BlackDot_Asleep_StimON4_4	0
1094	0	67.5	2020-07-24_BD_BlackDot_Asleep_StimON4_4	0
1095	0	72.5	2020-07-24_BD_BlackDot_Asleep_StimON4_4	0
1096	0	77.5	2020-07-24_BD_BlackDot_Asleep_StimON4_4	0
1097	0	82.5	2020-07-24_BD_BlackDot_Asleep_StimON4_4	0
1098	0	87.5	2020-07-24_BD_BlackDot_Asleep_StimON4_4	0.2
1099	0	2.5	2020-07-24_BD_BlackDot_Asleep_StimON5_0	0.4
1100	0	7.5	2020-07-24_BD_BlackDot_Asleep_StimON5_0	0.6
1101	0	12.5	2020-07-24_BD_BlackDot_Asleep_StimON5_0	0.8
1102	0	17.5	2020-07-24_BD_BlackDot_Asleep_StimON5_0	0.2
1103	0	22.5	2020-07-24_BD_BlackDot_Asleep_StimON5_0	0.4
1104	0	27.5	2020-07-24_BD_BlackDot_Asleep_StimON5_0	0.2
1105	1	32.5	2020-07-24_BD_BlackDot_Asleep_StimON5_0	0
1106	1	37.5	2020-07-24_BD_BlackDot_Asleep_StimON5_0	0
1107	1	42.5	2020-07-24_BD_BlackDot_Asleep_StimON5_0	0
1108	1	47.5	2020-07-24_BD_BlackDot_Asleep_StimON5_0	0
1109	1	52.5	2020-07-24_BD_BlackDot_Asleep_StimON5_0	0
1110	1	57.5	2020-07-24_BD_BlackDot_Asleep_StimON5_0	0
1111	0	62.5	2020-07-24_BD_BlackDot_Asleep_StimON5_0	0
1112	0	67.5	2020-07-24_BD_BlackDot_Asleep_StimON5_0	0.6
1113	0	72.5	2020-07-24_BD_BlackDot_Asleep_StimON5_0	0.2
1114	0	77.5	2020-07-24_BD_BlackDot_Asleep_StimON5_0	0.2
1115	0	82.5	2020-07-24_BD_BlackDot_Asleep_StimON5_0	0
1116	0	87.5	2020-07-24_BD_BlackDot_Asleep_StimON5_0	0.2
1117	0	2.5	2020-07-24_BD_BlackDot_Asleep_StimON5_1	0
1118	0	7.5	2020-07-24_BD_BlackDot_Asleep_StimON5_1	0
1119	0	12.5	2020-07-24_BD_BlackDot_Asleep_StimON5_1	0
1120	0	17.5	2020-07-24_BD_BlackDot_Asleep_StimON5_1	0
1121	0	22.5	2020-07-24_BD_BlackDot_Asleep_StimON5_1	0.6
1122	0	27.5	2020-07-24_BD_BlackDot_Asleep_StimON5_1	0
1123	1	32.5	2020-07-24_BD_BlackDot_Asleep_StimON5_1	0.2
1124	1	37.5	2020-07-24_BD_BlackDot_Asleep_StimON5_1	0.6
1125	1	42.5	2020-07-24_BD_BlackDot_Asleep_StimON5_1	0.4
1126	1	47.5	2020-07-24_BD_BlackDot_Asleep_StimON5_1	0
1127	1	52.5	2020-07-24_BD_BlackDot_Asleep_StimON5_1	0
1128	1	57.5	2020-07-24_BD_BlackDot_Asleep_StimON5_1	0
1129	0	62.5	2020-07-24_BD_BlackDot_Asleep_StimON5_1	0.4
1130	0	67.5	2020-07-24_BD_BlackDot_Asleep_StimON5_1	0.2
1131	0	72.5	2020-07-24_BD_BlackDot_Asleep_StimON5_1	0
1132	0	77.5	2020-07-24_BD_BlackDot_Asleep_StimON5_1	0
1133	0	82.5	2020-07-24_BD_BlackDot_Asleep_StimON5_1	0.4
1134	0	87.5	2020-07-24_BD_BlackDot_Asleep_StimON5_1	0.2
1135	0	2.5	2020-07-24_BD_BlackDot_Asleep_StimON5_2	0.2
1136	0	7.5	2020-07-24_BD_BlackDot_Asleep_StimON5_2	0
1137	0	12.5	2020-07-24_BD_BlackDot_Asleep_StimON5_2	0
1138	0	17.5	2020-07-24_BD_BlackDot_Asleep_StimON5_2	0
1139	0	22.5	2020-07-24_BD_BlackDot_Asleep_StimON5_2	0
1140	0	27.5	2020-07-24_BD_BlackDot_Asleep_StimON5_2	0.2
1141	1	32.5	2020-07-24_BD_BlackDot_Asleep_StimON5_2	0
1142	1	37.5	2020-07-24_BD_BlackDot_Asleep_StimON5_2	0
1143	1	42.5	2020-07-24_BD_BlackDot_Asleep_StimON5_2	0
1144	1	47.5	2020-07-24_BD_BlackDot_Asleep_StimON5_2	0
1145	1	52.5	2020-07-24_BD_BlackDot_Asleep_StimON5_2	0.4
1146	1	57.5	2020-07-24_BD_BlackDot_Asleep_StimON5_2	0.2
1147	0	62.5	2020-07-24_BD_BlackDot_Asleep_StimON5_2	0.6
1148	0	67.5	2020-07-24_BD_BlackDot_Asleep_StimON5_2	0
1149	0	72.5	2020-07-24_BD_BlackDot_Asleep_StimON5_2	0.6
1150	0	77.5	2020-07-24_BD_BlackDot_Asleep_StimON5_2	0.6
1151	0	82.5	2020-07-24_BD_BlackDot_Asleep_StimON5_2	0.4
1152	0	87.5	2020-07-24_BD_BlackDot_Asleep_StimON5_2	0
1153	0	2.5	2020-07-24_BD_BlackDot_Asleep_StimON5_3	0.2
1154	0	7.5	2020-07-24_BD_BlackDot_Asleep_StimON5_3	0
1155	0	12.5	2020-07-24_BD_BlackDot_Asleep_StimON5_3	0
1156	0	17.5	2020-07-24_BD_BlackDot_Asleep_StimON5_3	0
1157	0	22.5	2020-07-24_BD_BlackDot_Asleep_StimON5_3	0
1158	0	27.5	2020-07-24_BD_BlackDot_Asleep_StimON5_3	0
1159	1	32.5	2020-07-24_BD_BlackDot_Asleep_StimON5_3	0
1160	1	37.5	2020-07-24_BD_BlackDot_Asleep_StimON5_3	0
1161	1	42.5	2020-07-24_BD_BlackDot_Asleep_StimON5_3	0
1162	1	47.5	2020-07-24_BD_BlackDot_Asleep_StimON5_3	0
1163	1	52.5	2020-07-24_BD_BlackDot_Asleep_StimON5_3	0
1164	1	57.5	2020-07-24_BD_BlackDot_Asleep_StimON5_3	0
1165	0	62.5	2020-07-24_BD_BlackDot_Asleep_StimON5_3	0.6
1166	0	67.5	2020-07-24_BD_BlackDot_Asleep_StimON5_3	0.4
1167	0	72.5	2020-07-24_BD_BlackDot_Asleep_StimON5_3	0.4
1168	0	77.5	2020-07-24_BD_BlackDot_Asleep_StimON5_3	0.6
1169	0	82.5	2020-07-24_BD_BlackDot_Asleep_StimON5_3	0.4
1170	0	87.5	2020-07-24_BD_BlackDot_Asleep_StimON5_3	0
1171	0	2.5	2020-07-24_BD_BlackDot_Asleep_StimON5_4	0.6
1172	0	7.5	2020-07-24_BD_BlackDot_Asleep_StimON5_4	0.2
1173	0	12.5	2020-07-24_BD_BlackDot_Asleep_StimON5_4	0.2
1174	0	17.5	2020-07-24_BD_BlackDot_Asleep_StimON5_4	0.4
1175	0	22.5	2020-07-24_BD_BlackDot_Asleep_StimON5_4	0.4
1176	0	27.5	2020-07-24_BD_BlackDot_Asleep_StimON5_4	0.6
1177	1	32.5	2020-07-24_BD_BlackDot_Asleep_StimON5_4	0
1178	1	37.5	2020-07-24_BD_BlackDot_Asleep_StimON5_4	0
1179	1	42.5	2020-07-24_BD_BlackDot_Asleep_StimON5_4	0
1180	1	47.5	2020-07-24_BD_BlackDot_Asleep_StimON5_4	0
1181	1	52.5	2020-07-24_BD_BlackDot_Asleep_StimON5_4	0
1182	1	57.5	2020-07-24_BD_BlackDot_Asleep_StimON5_4	0.4
1183	0	62.5	2020-07-24_BD_BlackDot_Asleep_StimON5_4	0.2
1184	0	67.5	2020-07-24_BD_BlackDot_Asleep_StimON5_4	0.4
1185	0	72.5	2020-07-24_BD_BlackDot_Asleep_StimON5_4	0.4
1186	0	77.5	2020-07-24_BD_BlackDot_Asleep_StimON5_4	0.2
1187	0	82.5	2020-07-24_BD_BlackDot_Asleep_StimON5_4	0
1188	0	87.5	2020-07-24_BD_BlackDot_Asleep_StimON5_4	0
1189	0	2.5	2020-07-24_BD_BlackDot_Asleep_StimON6_0	0.4
1190	0	7.5	2020-07-24_BD_BlackDot_Asleep_StimON6_0	0.2
1191	0	12.5	2020-07-24_BD_BlackDot_Asleep_StimON6_0	0.4
1192	0	17.5	2020-07-24_BD_BlackDot_Asleep_StimON6_0	0
1193	0	22.5	2020-07-24_BD_BlackDot_Asleep_StimON6_0	0.2
1194	0	27.5	2020-07-24_BD_BlackDot_Asleep_StimON6_0	0
1195	1	32.5	2020-07-24_BD_BlackDot_Asleep_StimON6_0	0
1196	1	37.5	2020-07-24_BD_BlackDot_Asleep_StimON6_0	0
1197	1	42.5	2020-07-24_BD_BlackDot_Asleep_StimON6_0	0
1198	1	47.5	2020-07-24_BD_BlackDot_Asleep_StimON6_0	0.2
1199	1	52.5	2020-07-24_BD_BlackDot_Asleep_StimON6_0	0.4
1200	1	57.5	2020-07-24_BD_BlackDot_Asleep_StimON6_0	0.2
1201	0	62.5	2020-07-24_BD_BlackDot_Asleep_StimON6_0	0.4
1202	0	67.5	2020-07-24_BD_BlackDot_Asleep_StimON6_0	0.2
1203	0	72.5	2020-07-24_BD_BlackDot_Asleep_StimON6_0	0.6
1204	0	77.5	2020-07-24_BD_BlackDot_Asleep_StimON6_0	0
1205	0	82.5	2020-07-24_BD_BlackDot_Asleep_StimON6_0	0
1206	0	87.5	2020-07-24_BD_BlackDot_Asleep_StimON6_0	0.4
1207	0	2.5	2020-07-24_BD_BlackDot_Asleep_StimON6_1	0.4
1208	0	7.5	2020-07-24_BD_BlackDot_Asleep_StimON6_1	1
1209	0	12.5	2020-07-24_BD_BlackDot_Asleep_StimON6_1	0.2
1210	0	17.5	2020-07-24_BD_BlackDot_Asleep_StimON6_1	0
1211	0	22.5	2020-07-24_BD_BlackDot_Asleep_StimON6_1	0.2
1212	0	27.5	2020-07-24_BD_BlackDot_Asleep_StimON6_1	0.2
1213	1	32.5	2020-07-24_BD_BlackDot_Asleep_StimON6_1	0
1214	1	37.5	2020-07-24_BD_BlackDot_Asleep_StimON6_1	0.2
1215	1	42.5	2020-07-24_BD_BlackDot_Asleep_StimON6_1	0
1216	1	47.5	2020-07-24_BD_BlackDot_Asleep_StimON6_1	0
1217	1	52.5	2020-07-24_BD_BlackDot_Asleep_StimON6_1	0
1218	1	57.5	2020-07-24_BD_BlackDot_Asleep_StimON6_1	0
1219	0	62.5	2020-07-24_BD_BlackDot_Asleep_StimON6_1	0.2
1220	0	67.5	2020-07-24_BD_BlackDot_Asleep_StimON6_1	0.2
1221	0	72.5	2020-07-24_BD_BlackDot_Asleep_StimON6_1	0.4
1222	0	77.5	2020-07-24_BD_BlackDot_Asleep_StimON6_1	1
1223	0	82.5	2020-07-24_BD_BlackDot_Asleep_StimON6_1	0.8
1224	0	87.5	2020-07-24_BD_BlackDot_Asleep_StimON6_1	0.6
1225	0	2.5	2020-07-24_BD_BlackDot_Asleep_StimON6_2	0.8
1226	0	7.5	2020-07-24_BD_BlackDot_Asleep_StimON6_2	0.2
1227	0	12.5	2020-07-24_BD_BlackDot_Asleep_StimON6_2	0.8
1228	0	17.5	2020-07-24_BD_BlackDot_Asleep_StimON6_2	0.2
1229	0	22.5	2020-07-24_BD_BlackDot_Asleep_StimON6_2	0.4
1230	0	27.5	2020-07-24_BD_BlackDot_Asleep_StimON6_2	0.6
1231	1	32.5	2020-07-24_BD_BlackDot_Asleep_StimON6_2	0
1232	1	37.5	2020-07-24_BD_BlackDot_Asleep_StimON6_2	0.2
1233	1	42.5	2020-07-24_BD_BlackDot_Asleep_StimON6_2	0.2
1234	1	47.5	2020-07-24_BD_BlackDot_Asleep_StimON6_2	0
1235	1	52.5	2020-07-24_BD_BlackDot_Asleep_StimON6_2	0.2
1236	1	57.5	2020-07-24_BD_BlackDot_Asleep_StimON6_2	0
1237	0	62.5	2020-07-24_BD_BlackDot_Asleep_StimON6_2	0
1238	0	67.5	2020-07-24_BD_BlackDot_Asleep_StimON6_2	0.4
1239	0	72.5	2020-07-24_BD_BlackDot_Asleep_StimON6_2	0.2
1240	0	77.5	2020-07-24_BD_BlackDot_Asleep_StimON6_2	0.4
1241	0	82.5	2020-07-24_BD_BlackDot_Asleep_StimON6_2	0.6
1242	0	87.5	2020-07-24_BD_BlackDot_Asleep_StimON6_2	0.4
1243	0	2.5	2020-07-24_BD_BlackDot_Asleep_StimON6_3	0
1244	0	7.5	2020-07-24_BD_BlackDot_Asleep_StimON6_3	0
1245	0	12.5	2020-07-24_BD_BlackDot_Asleep_StimON6_3	0
1246	0	17.5	2020-07-24_BD_BlackDot_Asleep_StimON6_3	0
1247	0	22.5	2020-07-24_BD_BlackDot_Asleep_StimON6_3	0
1248	0	27.5	2020-07-24_BD_BlackDot_Asleep_StimON6_3	0
1249	1	32.5	2020-07-24_BD_BlackDot_Asleep_StimON6_3	0
1250	1	37.5	2020-07-24_BD_BlackDot_Asleep_StimON6_3	0
1251	1	42.5	2020-07-24_BD_BlackDot_Asleep_StimON6_3	0.4
1252	1	47.5	2020-07-24_BD_BlackDot_Asleep_StimON6_3	0
1253	1	52.5	2020-07-24_BD_BlackDot_Asleep_StimON6_3	0
1254	1	57.5	2020-07-24_BD_BlackDot_Asleep_StimON6_3	0
1255	0	62.5	2020-07-24_BD_BlackDot_Asleep_StimON6_3	0
1256	0	67.5	2020-07-24_BD_BlackDot_Asleep_StimON6_3	0
1257	0	72.5	2020-07-24_BD_BlackDot_Asleep_StimON6_3	0
1258	0	77.5	2020-07-24_BD_BlackDot_Asleep_StimON6_3	0
1259	0	82.5	2020-07-24_BD_BlackDot_Asleep_StimON6_3	0
1260	0	87.5	2020-07-24_BD_BlackDot_Asleep_StimON6_3	0
1261	0	2.5	2020-08-11_BR_BR_sleep_1_g0_0	0
1262	0	7.5	2020-08-11_BR_BR_sleep_1_g0_0	0
1263	0	12.5	2020-08-11_BR_BR_sleep_1_g0_0	0
1264	0	17.5	2020-08-11_BR_BR_sleep_1_g0_0	0
1265	0	22.5	2020-08-11_BR_BR_sleep_1_g0_0	0
1266	0	27.5	2020-08-11_BR_BR_sleep_1_g0_0	0
1267	1	32.5	2020-08-11_BR_BR_sleep_1_g0_0	0
1268	1	37.5	2020-08-11_BR_BR_sleep_1_g0_0	0
1269	1	42.5	2020-08-11_BR_BR_sleep_1_g0_0	0
1270	1	47.5	2020-08-11_BR_BR_sleep_1_g0_0	0
1271	1	52.5	2020-08-11_BR_BR_sleep_1_g0_0	0
1272	1	57.5	2020-08-11_BR_BR_sleep_1_g0_0	0
1273	0	62.5	2020-08-11_BR_BR_sleep_1_g0_0	0.2
1274	0	67.5	2020-08-11_BR_BR_sleep_1_g0_0	0.4
1275	0	72.5	2020-08-11_BR_BR_sleep_1_g0_0	0.4
1276	0	77.5	2020-08-11_BR_BR_sleep_1_g0_0	0.2
1277	0	82.5	2020-08-11_BR_BR_sleep_1_g0_0	0.2
1278	0	87.5	2020-08-11_BR_BR_sleep_1_g0_0	0.2
1279	0	2.5	2020-08-11_BR_BR_sleep_1_g0_1	0.4
1280	0	7.5	2020-08-11_BR_BR_sleep_1_g0_1	0.4
1281	0	12.5	2020-08-11_BR_BR_sleep_1_g0_1	0.2
1282	0	17.5	2020-08-11_BR_BR_sleep_1_g0_1	0.4
1283	0	22.5	2020-08-11_BR_BR_sleep_1_g0_1	0
1284	0	27.5	2020-08-11_BR_BR_sleep_1_g0_1	0
1285	1	32.5	2020-08-11_BR_BR_sleep_1_g0_1	0
1286	1	37.5	2020-08-11_BR_BR_sleep_1_g0_1	0
1287	1	42.5	2020-08-11_BR_BR_sleep_1_g0_1	0
1288	1	47.5	2020-08-11_BR_BR_sleep_1_g0_1	0
1289	1	52.5	2020-08-11_BR_BR_sleep_1_g0_1	0
1290	1	57.5	2020-08-11_BR_BR_sleep_1_g0_1	0
1291	0	62.5	2020-08-11_BR_BR_sleep_1_g0_1	0
1292	0	67.5	2020-08-11_BR_BR_sleep_1_g0_1	0.4
1293	0	72.5	2020-08-11_BR_BR_sleep_1_g0_1	0.2
1294	0	77.5	2020-08-11_BR_BR_sleep_1_g0_1	0.4
1295	0	82.5	2020-08-11_BR_BR_sleep_1_g0_1	0.2
1296	0	87.5	2020-08-11_BR_BR_sleep_1_g0_1	0
1297	0	2.5	2020-08-11_BR_BR_sleep_2_g0_0	0.8
1298	0	7.5	2020-08-11_BR_BR_sleep_2_g0_0	0.2
1299	0	12.5	2020-08-11_BR_BR_sleep_2_g0_0	0.2
1300	0	17.5	2020-08-11_BR_BR_sleep_2_g0_0	0
1301	0	22.5	2020-08-11_BR_BR_sleep_2_g0_0	0
1302	0	27.5	2020-08-11_BR_BR_sleep_2_g0_0	0
1303	1	32.5	2020-08-11_BR_BR_sleep_2_g0_0	0
1304	1	37.5	2020-08-11_BR_BR_sleep_2_g0_0	0
1305	1	42.5	2020-08-11_BR_BR_sleep_2_g0_0	0
1306	1	47.5	2020-08-11_BR_BR_sleep_2_g0_0	0
1307	1	52.5	2020-08-11_BR_BR_sleep_2_g0_0	0
1308	1	57.5	2020-08-11_BR_BR_sleep_2_g0_0	0
1309	0	62.5	2020-08-11_BR_BR_sleep_2_g0_0	0.4
1310	0	67.5	2020-08-11_BR_BR_sleep_2_g0_0	0
1311	0	72.5	2020-08-11_BR_BR_sleep_2_g0_0	0
1312	0	77.5	2020-08-11_BR_BR_sleep_2_g0_0	0.2
1313	0	82.5	2020-08-11_BR_BR_sleep_2_g0_0	0
1314	0	87.5	2020-08-11_BR_BR_sleep_2_g0_0	0.2
1315	0	2.5	2020-08-11_BR_BR_sleep_2_g0_1	0.2
1316	0	7.5	2020-08-11_BR_BR_sleep_2_g0_1	0
1317	0	12.5	2020-08-11_BR_BR_sleep_2_g0_1	0
1318	0	17.5	2020-08-11_BR_BR_sleep_2_g0_1	0.2
1319	0	22.5	2020-08-11_BR_BR_sleep_2_g0_1	0.2
1320	0	27.5	2020-08-11_BR_BR_sleep_2_g0_1	0.6
1321	1	32.5	2020-08-11_BR_BR_sleep_2_g0_1	0
1322	1	37.5	2020-08-11_BR_BR_sleep_2_g0_1	0
1323	1	42.5	2020-08-11_BR_BR_sleep_2_g0_1	0
1324	1	47.5	2020-08-11_BR_BR_sleep_2_g0_1	0
1325	1	52.5	2020-08-11_BR_BR_sleep_2_g0_1	0
1326	1	57.5	2020-08-11_BR_BR_sleep_2_g0_1	0
1327	0	62.5	2020-08-11_BR_BR_sleep_2_g0_1	0
1328	0	67.5	2020-08-11_BR_BR_sleep_2_g0_1	0.6
1329	0	72.5	2020-08-11_BR_BR_sleep_2_g0_1	0.6
1330	0	77.5	2020-08-11_BR_BR_sleep_2_g0_1	0.6
1331	0	82.5	2020-08-11_BR_BR_sleep_2_g0_1	0.4
1332	0	87.5	2020-08-11_BR_BR_sleep_2_g0_1	0.4
1333	0	2.5	2020-08-11_BR_BR_sleep_4_g0_0	0.2
1334	0	7.5	2020-08-11_BR_BR_sleep_4_g0_0	0.6
1335	0	12.5	2020-08-11_BR_BR_sleep_4_g0_0	0.4
1336	0	17.5	2020-08-11_BR_BR_sleep_4_g0_0	0.4
1337	0	22.5	2020-08-11_BR_BR_sleep_4_g0_0	0
1338	0	27.5	2020-08-11_BR_BR_sleep_4_g0_0	0
1339	1	32.5	2020-08-11_BR_BR_sleep_4_g0_0	0
1340	1	37.5	2020-08-11_BR_BR_sleep_4_g0_0	0
1341	1	42.5	2020-08-11_BR_BR_sleep_4_g0_0	0
1342	1	47.5	2020-08-11_BR_BR_sleep_4_g0_0	0
1343	1	52.5	2020-08-11_BR_BR_sleep_4_g0_0	0
1344	1	57.5	2020-08-11_BR_BR_sleep_4_g0_0	0
1345	0	62.5	2020-08-11_BR_BR_sleep_4_g0_0	0.6
1346	0	67.5	2020-08-11_BR_BR_sleep_4_g0_0	0.4
1347	0	72.5	2020-08-11_BR_BR_sleep_4_g0_0	0.2
1348	0	77.5	2020-08-11_BR_BR_sleep_4_g0_0	0.8
1349	0	82.5	2020-08-11_BR_BR_sleep_4_g0_0	0
1350	0	87.5	2020-08-11_BR_BR_sleep_4_g0_0	0.4
1351	0	2.5	2020-08-11_BR_BR_sleep_4_g0_1	0.2
1352	0	7.5	2020-08-11_BR_BR_sleep_4_g0_1	0
1353	0	12.5	2020-08-11_BR_BR_sleep_4_g0_1	0.2
1354	0	17.5	2020-08-11_BR_BR_sleep_4_g0_1	0.6
1355	0	22.5	2020-08-11_BR_BR_sleep_4_g0_1	0.6
1356	0	27.5	2020-08-11_BR_BR_sleep_4_g0_1	0
1357	1	32.5	2020-08-11_BR_BR_sleep_4_g0_1	0
1358	1	37.5	2020-08-11_BR_BR_sleep_4_g0_1	0
1359	1	42.5	2020-08-11_BR_BR_sleep_4_g0_1	0.2
1360	1	47.5	2020-08-11_BR_BR_sleep_4_g0_1	0
1361	1	52.5	2020-08-11_BR_BR_sleep_4_g0_1	0
1362	1	57.5	2020-08-11_BR_BR_sleep_4_g0_1	0
1363	0	62.5	2020-08-11_BR_BR_sleep_4_g0_1	0
1364	0	67.5	2020-08-11_BR_BR_sleep_4_g0_1	0
1365	0	72.5	2020-08-11_BR_BR_sleep_4_g0_1	0
1366	0	77.5	2020-08-11_BR_BR_sleep_4_g0_1	0
1367	0	82.5	2020-08-11_BR_BR_sleep_4_g0_1	0.4
1368	0	87.5	2020-08-11_BR_BR_sleep_4_g0_1	0
1369	0	2.5	2020-08-11_BR_BR_sleep_4_g0_2	0.2
1370	0	7.5	2020-08-11_BR_BR_sleep_4_g0_2	0.2
1371	0	12.5	2020-08-11_BR_BR_sleep_4_g0_2	0.2
1372	0	17.5	2020-08-11_BR_BR_sleep_4_g0_2	0.2
1373	0	22.5	2020-08-11_BR_BR_sleep_4_g0_2	0.2
1374	0	27.5	2020-08-11_BR_BR_sleep_4_g0_2	0.2
1375	1	32.5	2020-08-11_BR_BR_sleep_4_g0_2	0
1376	1	37.5	2020-08-11_BR_BR_sleep_4_g0_2	0
1377	1	42.5	2020-08-11_BR_BR_sleep_4_g0_2	0
1378	1	47.5	2020-08-11_BR_BR_sleep_4_g0_2	0
1379	1	52.5	2020-08-11_BR_BR_sleep_4_g0_2	0
1380	1	57.5	2020-08-11_BR_BR_sleep_4_g0_2	0
1381	0	62.5	2020-08-11_BR_BR_sleep_4_g0_2	0.2
1382	0	67.5	2020-08-11_BR_BR_sleep_4_g0_2	0.4
1383	0	72.5	2020-08-11_BR_BR_sleep_4_g0_2	0
1384	0	77.5	2020-08-11_BR_BR_sleep_4_g0_2	0
1385	0	82.5	2020-08-11_BR_BR_sleep_4_g0_2	0
1386	0	87.5	2020-08-11_BR_BR_sleep_4_g0_2	0
1387	0	2.5	2020-08-11_TL_TL_sleep_1_g0_0	0.8
1388	0	7.5	2020-08-11_TL_TL_sleep_1_g0_0	0
1389	0	12.5	2020-08-11_TL_TL_sleep_1_g0_0	0.4
1390	0	17.5	2020-08-11_TL_TL_sleep_1_g0_0	0.2
1391	0	22.5	2020-08-11_TL_TL_sleep_1_g0_0	0.2
1392	0	27.5	2020-08-11_TL_TL_sleep_1_g0_0	0
1393	1	32.5	2020-08-11_TL_TL_sleep_1_g0_0	0
1394	1	37.5	2020-08-11_TL_TL_sleep_1_g0_0	0
1395	1	42.5	2020-08-11_TL_TL_sleep_1_g0_0	0
1396	1	47.5	2020-08-11_TL_TL_sleep_1_g0_0	0
1397	1	52.5	2020-08-11_TL_TL_sleep_1_g0_0	0
1398	1	57.5	2020-08-11_TL_TL_sleep_1_g0_0	0
1399	0	62.5	2020-08-11_TL_TL_sleep_1_g0_0	0
1400	0	67.5	2020-08-11_TL_TL_sleep_1_g0_0	0.6
1401	0	72.5	2020-08-11_TL_TL_sleep_1_g0_0	0.4
1402	0	77.5	2020-08-11_TL_TL_sleep_1_g0_0	0.8
1403	0	82.5	2020-08-11_TL_TL_sleep_1_g0_0	0
1404	0	87.5	2020-08-11_TL_TL_sleep_1_g0_0	0
1405	0	2.5	2020-08-11_TL_TL_sleep_1_g0_1	0
1406	0	7.5	2020-08-11_TL_TL_sleep_1_g0_1	0
1407	0	12.5	2020-08-11_TL_TL_sleep_1_g0_1	0.2
1408	0	17.5	2020-08-11_TL_TL_sleep_1_g0_1	0.4
1409	0	22.5	2020-08-11_TL_TL_sleep_1_g0_1	0
1410	0	27.5	2020-08-11_TL_TL_sleep_1_g0_1	0.6
1411	1	32.5	2020-08-11_TL_TL_sleep_1_g0_1	0
1412	1	37.5	2020-08-11_TL_TL_sleep_1_g0_1	0
1413	1	42.5	2020-08-11_TL_TL_sleep_1_g0_1	0
1414	1	47.5	2020-08-11_TL_TL_sleep_1_g0_1	0
1415	1	52.5	2020-08-11_TL_TL_sleep_1_g0_1	0
1416	1	57.5	2020-08-11_TL_TL_sleep_1_g0_1	0
1417	0	62.5	2020-08-11_TL_TL_sleep_1_g0_1	0.2
1418	0	67.5	2020-08-11_TL_TL_sleep_1_g0_1	1
1419	0	72.5	2020-08-11_TL_TL_sleep_1_g0_1	0.2
1420	0	77.5	2020-08-11_TL_TL_sleep_1_g0_1	0
1421	0	82.5	2020-08-11_TL_TL_sleep_1_g0_1	0.2
1422	0	87.5	2020-08-11_TL_TL_sleep_1_g0_1	0.6
1423	0	2.5	2020-08-11_TL_TL_sleep_1_g0_2	0.4
1424	0	7.5	2020-08-11_TL_TL_sleep_1_g0_2	0.4
1425	0	12.5	2020-08-11_TL_TL_sleep_1_g0_2	0.4
1426	0	17.5	2020-08-11_TL_TL_sleep_1_g0_2	0.4
1427	0	22.5	2020-08-11_TL_TL_sleep_1_g0_2	0
1428	0	27.5	2020-08-11_TL_TL_sleep_1_g0_2	0.2
1429	1	32.5	2020-08-11_TL_TL_sleep_1_g0_2	0
1430	1	37.5	2020-08-11_TL_TL_sleep_1_g0_2	0
1431	1	42.5	2020-08-11_TL_TL_sleep_1_g0_2	0
1432	1	47.5	2020-08-11_TL_TL_sleep_1_g0_2	0
1433	1	52.5	2020-08-11_TL_TL_sleep_1_g0_2	0
1434	1	57.5	2020-08-11_TL_TL_sleep_1_g0_2	0
1435	0	62.5	2020-08-11_TL_TL_sleep_1_g0_2	0.6
1436	0	67.5	2020-08-11_TL_TL_sleep_1_g0_2	0.4
1437	0	72.5	2020-08-11_TL_TL_sleep_1_g0_2	0.4
1438	0	77.5	2020-08-11_TL_TL_sleep_1_g0_2	0
1439	0	82.5	2020-08-11_TL_TL_sleep_1_g0_2	0.6
1440	0	87.5	2020-08-11_TL_TL_sleep_1_g0_2	0
1441	0	2.5	2020-08-11_TL_TL_sleep_1_g0_3	0.2
1442	0	7.5	2020-08-11_TL_TL_sleep_1_g0_3	0.4
1443	0	12.5	2020-08-11_TL_TL_sleep_1_g0_3	0.2
1444	0	17.5	2020-08-11_TL_TL_sleep_1_g0_3	0
1445	0	22.5	2020-08-11_TL_TL_sleep_1_g0_3	0.4
1446	0	27.5	2020-08-11_TL_TL_sleep_1_g0_3	0
1447	1	32.5	2020-08-11_TL_TL_sleep_1_g0_3	0
1448	1	37.5	2020-08-11_TL_TL_sleep_1_g0_3	0
1449	1	42.5	2020-08-11_TL_TL_sleep_1_g0_3	0
1450	1	47.5	2020-08-11_TL_TL_sleep_1_g0_3	0
1451	1	52.5	2020-08-11_TL_TL_sleep_1_g0_3	0
1452	1	57.5	2020-08-11_TL_TL_sleep_1_g0_3	0
1453	0	62.5	2020-08-11_TL_TL_sleep_1_g0_3	0.2
1454	0	67.5	2020-08-11_TL_TL_sleep_1_g0_3	1
1455	0	72.5	2020-08-11_TL_TL_sleep_1_g0_3	0
1456	0	77.5	2020-08-11_TL_TL_sleep_1_g0_3	0.8
1457	0	82.5	2020-08-11_TL_TL_sleep_1_g0_3	0.2
1458	0	87.5	2020-08-11_TL_TL_sleep_1_g0_3	0.2
1459	0	2.5	2020-08-11_TL_TL_sleep_1_g0_4	0.6
1460	0	7.5	2020-08-11_TL_TL_sleep_1_g0_4	0
1461	0	12.5	2020-08-11_TL_TL_sleep_1_g0_4	0
1462	0	17.5	2020-08-11_TL_TL_sleep_1_g0_4	0.2
1463	0	22.5	2020-08-11_TL_TL_sleep_1_g0_4	0.2
1464	0	27.5	2020-08-11_TL_TL_sleep_1_g0_4	0.4
1465	1	32.5	2020-08-11_TL_TL_sleep_1_g0_4	0
1466	1	37.5	2020-08-11_TL_TL_sleep_1_g0_4	0
1467	1	42.5	2020-08-11_TL_TL_sleep_1_g0_4	0
1468	1	47.5	2020-08-11_TL_TL_sleep_1_g0_4	0
1469	1	52.5	2020-08-11_TL_TL_sleep_1_g0_4	0
1470	1	57.5	2020-08-11_TL_TL_sleep_1_g0_4	0
1471	0	62.5	2020-08-11_TL_TL_sleep_1_g0_4	0
1472	0	67.5	2020-08-11_TL_TL_sleep_1_g0_4	0
1473	0	72.5	2020-08-11_TL_TL_sleep_1_g0_4	0.4
1474	0	77.5	2020-08-11_TL_TL_sleep_1_g0_4	0
1475	0	82.5	2020-08-11_TL_TL_sleep_1_g0_4	0.2
1476	0	87.5	2020-08-11_TL_TL_sleep_1_g0_4	0
1477	0	2.5	2020-08-11_TL_TL_sleep_1_g0_5	0.6
1478	0	7.5	2020-08-11_TL_TL_sleep_1_g0_5	0.4
1479	0	12.5	2020-08-11_TL_TL_sleep_1_g0_5	0
1480	0	17.5	2020-08-11_TL_TL_sleep_1_g0_5	0
1481	0	22.5	2020-08-11_TL_TL_sleep_1_g0_5	0
1482	0	27.5	2020-08-11_TL_TL_sleep_1_g0_5	0
1483	1	32.5	2020-08-11_TL_TL_sleep_1_g0_5	0
1484	1	37.5	2020-08-11_TL_TL_sleep_1_g0_5	0
1485	1	42.5	2020-08-11_TL_TL_sleep_1_g0_5	0
1486	1	47.5	2020-08-11_TL_TL_sleep_1_g0_5	0
1487	1	52.5	2020-08-11_TL_TL_sleep_1_g0_5	0
1488	1	57.5	2020-08-11_TL_TL_sleep_1_g0_5	0
1489	0	62.5	2020-08-11_TL_TL_sleep_1_g0_5	0
1490	0	67.5	2020-08-11_TL_TL_sleep_1_g0_5	0
1491	0	72.5	2020-08-11_TL_TL_sleep_1_g0_5	0
1492	0	77.5	2020-08-11_TL_TL_sleep_1_g0_5	0.4
1493	0	82.5	2020-08-11_TL_TL_sleep_1_g0_5	0.6
1494	0	87.5	2020-08-11_TL_TL_sleep_1_g0_5	0
1495	0	2.5	2020-08-11_TL_TL_sleep_2_g0_0	0.4
1496	0	7.5	2020-08-11_TL_TL_sleep_2_g0_0	0.2
1497	0	12.5	2020-08-11_TL_TL_sleep_2_g0_0	0.6
1498	0	17.5	2020-08-11_TL_TL_sleep_2_g0_0	0.4
1499	0	22.5	2020-08-11_TL_TL_sleep_2_g0_0	0
1500	0	27.5	2020-08-11_TL_TL_sleep_2_g0_0	0.4
1501	1	32.5	2020-08-11_TL_TL_sleep_2_g0_0	0
1502	1	37.5	2020-08-11_TL_TL_sleep_2_g0_0	0
1503	1	42.5	2020-08-11_TL_TL_sleep_2_g0_0	0
1504	1	47.5	2020-08-11_TL_TL_sleep_2_g0_0	0
1505	1	52.5	2020-08-11_TL_TL_sleep_2_g0_0	0
1506	1	57.5	2020-08-11_TL_TL_sleep_2_g0_0	0
1507	0	62.5	2020-08-11_TL_TL_sleep_2_g0_0	0.4
1508	0	67.5	2020-08-11_TL_TL_sleep_2_g0_0	0.4
1509	0	72.5	2020-08-11_TL_TL_sleep_2_g0_0	0
1510	0	77.5	2020-08-11_TL_TL_sleep_2_g0_0	0.2
1511	0	82.5	2020-08-11_TL_TL_sleep_2_g0_0	0.8
1512	0	87.5	2020-08-11_TL_TL_sleep_2_g0_0	0
1513	0	2.5	2020-08-11_TL_TL_sleep_2_g0_1	0.4
1514	0	7.5	2020-08-11_TL_TL_sleep_2_g0_1	0.2
1515	0	12.5	2020-08-11_TL_TL_sleep_2_g0_1	0
1516	0	17.5	2020-08-11_TL_TL_sleep_2_g0_1	0
1517	0	22.5	2020-08-11_TL_TL_sleep_2_g0_1	0.2
1518	0	27.5	2020-08-11_TL_TL_sleep_2_g0_1	0.2
1519	1	32.5	2020-08-11_TL_TL_sleep_2_g0_1	0
1520	1	37.5	2020-08-11_TL_TL_sleep_2_g0_1	0
1521	1	42.5	2020-08-11_TL_TL_sleep_2_g0_1	0
1522	1	47.5	2020-08-11_TL_TL_sleep_2_g0_1	0
1523	1	52.5	2020-08-11_TL_TL_sleep_2_g0_1	0
1524	1	57.5	2020-08-11_TL_TL_sleep_2_g0_1	0
1525	0	62.5	2020-08-11_TL_TL_sleep_2_g0_1	0.2
1526	0	67.5	2020-08-11_TL_TL_sleep_2_g0_1	0.2
1527	0	72.5	2020-08-11_TL_TL_sleep_2_g0_1	0
1528	0	77.5	2020-08-11_TL_TL_sleep_2_g0_1	0.4
1529	0	82.5	2020-08-11_TL_TL_sleep_2_g0_1	0
1530	0	87.5	2020-08-11_TL_TL_sleep_2_g0_1	0.2
1531	0	2.5	2020-08-11_TL_TL_sleep_2_g0_2	0
1532	0	7.5	2020-08-11_TL_TL_sleep_2_g0_2	0
1533	0	12.5	2020-08-11_TL_TL_sleep_2_g0_2	0.4
1534	0	17.5	2020-08-11_TL_TL_sleep_2_g0_2	1
1535	0	22.5	2020-08-11_TL_TL_sleep_2_g0_2	0
1536	0	27.5	2020-08-11_TL_TL_sleep_2_g0_2	1
1537	1	32.5	2020-08-11_TL_TL_sleep_2_g0_2	0
1538	1	37.5	2020-08-11_TL_TL_sleep_2_g0_2	0
1539	1	42.5	2020-08-11_TL_TL_sleep_2_g0_2	0
1540	1	47.5	2020-08-11_TL_TL_sleep_2_g0_2	0
1541	1	52.5	2020-08-11_TL_TL_sleep_2_g0_2	0
1542	1	57.5	2020-08-11_TL_TL_sleep_2_g0_2	0
1543	0	62.5	2020-08-11_TL_TL_sleep_2_g0_2	0.4
1544	0	67.5	2020-08-11_TL_TL_sleep_2_g0_2	0.2
1545	0	72.5	2020-08-11_TL_TL_sleep_2_g0_2	0.4
1546	0	77.5	2020-08-11_TL_TL_sleep_2_g0_2	0.2
1547	0	82.5	2020-08-11_TL_TL_sleep_2_g0_2	0
1548	0	87.5	2020-08-11_TL_TL_sleep_2_g0_2	0
1549	0	2.5	2020-08-11_TL_TL_sleep_2_g0_3	0.2
1550	0	7.5	2020-08-11_TL_TL_sleep_2_g0_3	0
1551	0	12.5	2020-08-11_TL_TL_sleep_2_g0_3	0.4
1552	0	17.5	2020-08-11_TL_TL_sleep_2_g0_3	0.2
1553	0	22.5	2020-08-11_TL_TL_sleep_2_g0_3	0.4
1554	0	27.5	2020-08-11_TL_TL_sleep_2_g0_3	0.4
1555	1	32.5	2020-08-11_TL_TL_sleep_2_g0_3	0
1556	1	37.5	2020-08-11_TL_TL_sleep_2_g0_3	0
1557	1	42.5	2020-08-11_TL_TL_sleep_2_g0_3	0
1558	1	47.5	2020-08-11_TL_TL_sleep_2_g0_3	0
1559	1	52.5	2020-08-11_TL_TL_sleep_2_g0_3	0
1560	1	57.5	2020-08-11_TL_TL_sleep_2_g0_3	0
1561	0	62.5	2020-08-11_TL_TL_sleep_2_g0_3	0
1562	0	67.5	2020-08-11_TL_TL_sleep_2_g0_3	0.2
1563	0	72.5	2020-08-11_TL_TL_sleep_2_g0_3	0.2
1564	0	77.5	2020-08-11_TL_TL_sleep_2_g0_3	0
1565	0	82.5	2020-08-11_TL_TL_sleep_2_g0_3	0.2
1566	0	87.5	2020-08-11_TL_TL_sleep_2_g0_3	0.4
1567	0	2.5	2020-08-11_TL_TL_sleep_2_g0_4	0
1568	0	7.5	2020-08-11_TL_TL_sleep_2_g0_4	0
1569	0	12.5	2020-08-11_TL_TL_sleep_2_g0_4	0.6
1570	0	17.5	2020-08-11_TL_TL_sleep_2_g0_4	0
1571	0	22.5	2020-08-11_TL_TL_sleep_2_g0_4	0
1572	0	27.5	2020-08-11_TL_TL_sleep_2_g0_4	0
1573	1	32.5	2020-08-11_TL_TL_sleep_2_g0_4	0
1574	1	37.5	2020-08-11_TL_TL_sleep_2_g0_4	0
1575	1	42.5	2020-08-11_TL_TL_sleep_2_g0_4	0
1576	1	47.5	2020-08-11_TL_TL_sleep_2_g0_4	0
1577	1	52.5	2020-08-11_TL_TL_sleep_2_g0_4	0
1578	1	57.5	2020-08-11_TL_TL_sleep_2_g0_4	0
1579	0	62.5	2020-08-11_TL_TL_sleep_2_g0_4	0
1580	0	67.5	2020-08-11_TL_TL_sleep_2_g0_4	0
1581	0	72.5	2020-08-11_TL_TL_sleep_2_g0_4	0
1582	0	77.5	2020-08-11_TL_TL_sleep_2_g0_4	0
1583	0	82.5	2020-08-11_TL_TL_sleep_2_g0_4	0
1584	0	87.5	2020-08-11_TL_TL_sleep_2_g0_4	0
1585	0	2.5	2020-08-12_BR_BR_sleep_1_g0_0	0
1586	0	7.5	2020-08-12_BR_BR_sleep_1_g0_0	0.2
1587	0	12.5	2020-08-12_BR_BR_sleep_1_g0_0	0.4
1588	0	17.5	2020-08-12_BR_BR_sleep_1_g0_0	0.2
1589	0	22.5	2020-08-12_BR_BR_sleep_1_g0_0	0
1590	0	27.5	2020-08-12_BR_BR_sleep_1_g0_0	0
1591	1	32.5	2020-08-12_BR_BR_sleep_1_g0_0	0.2
1592	1	37.5	2020-08-12_BR_BR_sleep_1_g0_0	0
1593	1	42.5	2020-08-12_BR_BR_sleep_1_g0_0	0
1594	1	47.5	2020-08-12_BR_BR_sleep_1_g0_0	0
1595	1	52.5	2020-08-12_BR_BR_sleep_1_g0_0	0
1596	1	57.5	2020-08-12_BR_BR_sleep_1_g0_0	0
1597	0	62.5	2020-08-12_BR_BR_sleep_1_g0_0	0
1598	0	67.5	2020-08-12_BR_BR_sleep_1_g0_0	0.2
1599	0	72.5	2020-08-12_BR_BR_sleep_1_g0_0	1
1600	0	77.5	2020-08-12_BR_BR_sleep_1_g0_0	0.6
1601	0	82.5	2020-08-12_BR_BR_sleep_1_g0_0	0
1602	0	87.5	2020-08-12_BR_BR_sleep_1_g0_0	0
1603	0	2.5	2020-08-12_BR_BR_sleep_1_g0_1	0.2
1604	0	7.5	2020-08-12_BR_BR_sleep_1_g0_1	0.2
1605	0	12.5	2020-08-12_BR_BR_sleep_1_g0_1	0
1606	0	17.5	2020-08-12_BR_BR_sleep_1_g0_1	0.2
1607	0	22.5	2020-08-12_BR_BR_sleep_1_g0_1	0.2
1608	0	27.5	2020-08-12_BR_BR_sleep_1_g0_1	0
1609	1	32.5	2020-08-12_BR_BR_sleep_1_g0_1	0
1610	1	37.5	2020-08-12_BR_BR_sleep_1_g0_1	0
1611	1	42.5	2020-08-12_BR_BR_sleep_1_g0_1	0
1612	1	47.5	2020-08-12_BR_BR_sleep_1_g0_1	0
1613	1	52.5	2020-08-12_BR_BR_sleep_1_g0_1	0
1614	1	57.5	2020-08-12_BR_BR_sleep_1_g0_1	0
1615	0	62.5	2020-08-12_BR_BR_sleep_1_g0_1	0.2
1616	0	67.5	2020-08-12_BR_BR_sleep_1_g0_1	0.6
1617	0	72.5	2020-08-12_BR_BR_sleep_1_g0_1	0.4
1618	0	77.5	2020-08-12_BR_BR_sleep_1_g0_1	0.4
1619	0	82.5	2020-08-12_BR_BR_sleep_1_g0_1	0
1620	0	87.5	2020-08-12_BR_BR_sleep_1_g0_1	0
1621	0	2.5	2020-08-12_BR_BR_sleep_1_g0_2	0
1622	0	7.5	2020-08-12_BR_BR_sleep_1_g0_2	0.6
1623	0	12.5	2020-08-12_BR_BR_sleep_1_g0_2	0
1624	0	17.5	2020-08-12_BR_BR_sleep_1_g0_2	0.2
1625	0	22.5	2020-08-12_BR_BR_sleep_1_g0_2	0
1626	0	27.5	2020-08-12_BR_BR_sleep_1_g0_2	0.2
1627	1	32.5	2020-08-12_BR_BR_sleep_1_g0_2	0
1628	1	37.5	2020-08-12_BR_BR_sleep_1_g0_2	0
1629	1	42.5	2020-08-12_BR_BR_sleep_1_g0_2	0
1630	1	47.5	2020-08-12_BR_BR_sleep_1_g0_2	0
1631	1	52.5	2020-08-12_BR_BR_sleep_1_g0_2	0
1632	1	57.5	2020-08-12_BR_BR_sleep_1_g0_2	0
1633	0	62.5	2020-08-12_BR_BR_sleep_1_g0_2	0.2
1634	0	67.5	2020-08-12_BR_BR_sleep_1_g0_2	0.6
1635	0	72.5	2020-08-12_BR_BR_sleep_1_g0_2	0
1636	0	77.5	2020-08-12_BR_BR_sleep_1_g0_2	0
1637	0	82.5	2020-08-12_BR_BR_sleep_1_g0_2	0.2
1638	0	87.5	2020-08-12_BR_BR_sleep_1_g0_2	0
1639	0	2.5	2020-08-12_BR_BR_sleep_1_g0_3	0
1640	0	7.5	2020-08-12_BR_BR_sleep_1_g0_3	0.2
1641	0	12.5	2020-08-12_BR_BR_sleep_1_g0_3	0.2
1642	0	17.5	2020-08-12_BR_BR_sleep_1_g0_3	0
1643	0	22.5	2020-08-12_BR_BR_sleep_1_g0_3	0
1644	0	27.5	2020-08-12_BR_BR_sleep_1_g0_3	0
1645	1	32.5	2020-08-12_BR_BR_sleep_1_g0_3	0
1646	1	37.5	2020-08-12_BR_BR_sleep_1_g0_3	0
1647	1	42.5	2020-08-12_BR_BR_sleep_1_g0_3	0
1648	1	47.5	2020-08-12_BR_BR_sleep_1_g0_3	0
1649	1	52.5	2020-08-12_BR_BR_sleep_1_g0_3	0
1650	1	57.5	2020-08-12_BR_BR_sleep_1_g0_3	0
1651	0	62.5	2020-08-12_BR_BR_sleep_1_g0_3	0
1652	0	67.5	2020-08-12_BR_BR_sleep_1_g0_3	0.4
1653	0	72.5	2020-08-12_BR_BR_sleep_1_g0_3	0.2
1654	0	77.5	2020-08-12_BR_BR_sleep_1_g0_3	0.6
1655	0	82.5	2020-08-12_BR_BR_sleep_1_g0_3	0.6
1656	0	87.5	2020-08-12_BR_BR_sleep_1_g0_3	0.2
1657	0	2.5	2020-08-12_BR_BR_sleep_3_g0_0	0
1658	0	7.5	2020-08-12_BR_BR_sleep_3_g0_0	0
1659	0	12.5	2020-08-12_BR_BR_sleep_3_g0_0	0.8
1660	0	17.5	2020-08-12_BR_BR_sleep_3_g0_0	0
1661	0	22.5	2020-08-12_BR_BR_sleep_3_g0_0	0.6
1662	0	27.5	2020-08-12_BR_BR_sleep_3_g0_0	0.2
1663	1	32.5	2020-08-12_BR_BR_sleep_3_g0_0	0
1664	1	37.5	2020-08-12_BR_BR_sleep_3_g0_0	0
1665	1	42.5	2020-08-12_BR_BR_sleep_3_g0_0	0
1666	1	47.5	2020-08-12_BR_BR_sleep_3_g0_0	0
1667	1	52.5	2020-08-12_BR_BR_sleep_3_g0_0	0
1668	1	57.5	2020-08-12_BR_BR_sleep_3_g0_0	0
1669	0	62.5	2020-08-12_BR_BR_sleep_3_g0_0	1
1670	0	67.5	2020-08-12_BR_BR_sleep_3_g0_0	0.4
1671	0	72.5	2020-08-12_BR_BR_sleep_3_g0_0	0.2
1672	0	77.5	2020-08-12_BR_BR_sleep_3_g0_0	0
1673	0	82.5	2020-08-12_BR_BR_sleep_3_g0_0	0.2
1674	0	87.5	2020-08-12_BR_BR_sleep_3_g0_0	0.2
1675	0	2.5	2020-08-12_BR_BR_sleep_3_g0_1	0.2
1676	0	7.5	2020-08-12_BR_BR_sleep_3_g0_1	0.2
1677	0	12.5	2020-08-12_BR_BR_sleep_3_g0_1	0
1678	0	17.5	2020-08-12_BR_BR_sleep_3_g0_1	0
1679	0	22.5	2020-08-12_BR_BR_sleep_3_g0_1	0
1680	0	27.5	2020-08-12_BR_BR_sleep_3_g0_1	0
1681	1	32.5	2020-08-12_BR_BR_sleep_3_g0_1	0
1682	1	37.5	2020-08-12_BR_BR_sleep_3_g0_1	0
1683	1	42.5	2020-08-12_BR_BR_sleep_3_g0_1	0
1684	1	47.5	2020-08-12_BR_BR_sleep_3_g0_1	0
1685	1	52.5	2020-08-12_BR_BR_sleep_3_g0_1	0
1686	1	57.5	2020-08-12_BR_BR_sleep_3_g0_1	0
1687	0	62.5	2020-08-12_BR_BR_sleep_3_g0_1	0
1688	0	67.5	2020-08-12_BR_BR_sleep_3_g0_1	0.2
1689	0	72.5	2020-08-12_BR_BR_sleep_3_g0_1	0
1690	0	77.5	2020-08-12_BR_BR_sleep_3_g0_1	0
1691	0	82.5	2020-08-12_BR_BR_sleep_3_g0_1	0
1692	0	87.5	2020-08-12_BR_BR_sleep_3_g0_1	0
1693	0	2.5	2020-08-12_TL_TL_sleep_3_g0_0	0.6
1694	0	7.5	2020-08-12_TL_TL_sleep_3_g0_0	0
1695	0	12.5	2020-08-12_TL_TL_sleep_3_g0_0	0.2
1696	0	17.5	2020-08-12_TL_TL_sleep_3_g0_0	0
1697	0	22.5	2020-08-12_TL_TL_sleep_3_g0_0	0
1698	0	27.5	2020-08-12_TL_TL_sleep_3_g0_0	0
1699	1	32.5	2020-08-12_TL_TL_sleep_3_g0_0	0
1700	1	37.5	2020-08-12_TL_TL_sleep_3_g0_0	0
1701	1	42.5	2020-08-12_TL_TL_sleep_3_g0_0	0
1702	1	47.5	2020-08-12_TL_TL_sleep_3_g0_0	0
1703	1	52.5	2020-08-12_TL_TL_sleep_3_g0_0	0
1704	1	57.5	2020-08-12_TL_TL_sleep_3_g0_0	0
1705	0	62.5	2020-08-12_TL_TL_sleep_3_g0_0	0
1706	0	67.5	2020-08-12_TL_TL_sleep_3_g0_0	0.4
1707	0	72.5	2020-08-12_TL_TL_sleep_3_g0_0	0.2
1708	0	77.5	2020-08-12_TL_TL_sleep_3_g0_0	0
1709	0	82.5	2020-08-12_TL_TL_sleep_3_g0_0	0.2
1710	0	87.5	2020-08-12_TL_TL_sleep_3_g0_0	0.2
1711	0	2.5	2020-08-12_TL_TL_sleep_3_g0_1	0.2
1712	0	7.5	2020-08-12_TL_TL_sleep_3_g0_1	0
1713	0	12.5	2020-08-12_TL_TL_sleep_3_g0_1	0
1714	0	17.5	2020-08-12_TL_TL_sleep_3_g0_1	0
1715	0	22.5	2020-08-12_TL_TL_sleep_3_g0_1	0.2
1716	0	27.5	2020-08-12_TL_TL_sleep_3_g0_1	0
1717	1	32.5	2020-08-12_TL_TL_sleep_3_g0_1	0
1718	1	37.5	2020-08-12_TL_TL_sleep_3_g0_1	0
1719	1	42.5	2020-08-12_TL_TL_sleep_3_g0_1	0
1720	1	47.5	2020-08-12_TL_TL_sleep_3_g0_1	0
1721	1	52.5	2020-08-12_TL_TL_sleep_3_g0_1	0
1722	1	57.5	2020-08-12_TL_TL_sleep_3_g0_1	0
1723	0	62.5	2020-08-12_TL_TL_sleep_3_g0_1	0.4
1724	0	67.5	2020-08-12_TL_TL_sleep_3_g0_1	0.2
1725	0	72.5	2020-08-12_TL_TL_sleep_3_g0_1	0
1726	0	77.5	2020-08-12_TL_TL_sleep_3_g0_1	0.6
1727	0	82.5	2020-08-12_TL_TL_sleep_3_g0_1	0.2
1728	0	87.5	2020-08-12_TL_TL_sleep_3_g0_1	0.8
1729	0	2.5	2020-08-12_TL_TL_sleep_4_g0_0	0
1730	0	7.5	2020-08-12_TL_TL_sleep_4_g0_0	0
1731	0	12.5	2020-08-12_TL_TL_sleep_4_g0_0	0.6
1732	0	17.5	2020-08-12_TL_TL_sleep_4_g0_0	0.4
1733	0	22.5	2020-08-12_TL_TL_sleep_4_g0_0	0.8
1734	0	27.5	2020-08-12_TL_TL_sleep_4_g0_0	0.2
1735	1	32.5	2020-08-12_TL_TL_sleep_4_g0_0	0
1736	1	37.5	2020-08-12_TL_TL_sleep_4_g0_0	0
1737	1	42.5	2020-08-12_TL_TL_sleep_4_g0_0	0
1738	1	47.5	2020-08-12_TL_TL_sleep_4_g0_0	0
1739	1	52.5	2020-08-12_TL_TL_sleep_4_g0_0	0
1740	1	57.5	2020-08-12_TL_TL_sleep_4_g0_0	0
1741	0	62.5	2020-08-12_TL_TL_sleep_4_g0_0	0.2
1742	0	67.5	2020-08-12_TL_TL_sleep_4_g0_0	0.2
1743	0	72.5	2020-08-12_TL_TL_sleep_4_g0_0	0.2
1744	0	77.5	2020-08-12_TL_TL_sleep_4_g0_0	0
1745	0	82.5	2020-08-12_TL_TL_sleep_4_g0_0	0.2
1746	0	87.5	2020-08-12_TL_TL_sleep_4_g0_0	0
1747	0	2.5	2020-08-12_TL_TL_sleep_4_g0_1	0
1748	0	7.5	2020-08-12_TL_TL_sleep_4_g0_1	0
1749	0	12.5	2020-08-12_TL_TL_sleep_4_g0_1	0.2
1750	0	17.5	2020-08-12_TL_TL_sleep_4_g0_1	0
1751	0	22.5	2020-08-12_TL_TL_sleep_4_g0_1	0.6
1752	0	27.5	2020-08-12_TL_TL_sleep_4_g0_1	0.2
1753	1	32.5	2020-08-12_TL_TL_sleep_4_g0_1	0
1754	1	37.5	2020-08-12_TL_TL_sleep_4_g0_1	0
1755	1	42.5	2020-08-12_TL_TL_sleep_4_g0_1	0
1756	1	47.5	2020-08-12_TL_TL_sleep_4_g0_1	0
1757	1	52.5	2020-08-12_TL_TL_sleep_4_g0_1	0
1758	1	57.5	2020-08-12_TL_TL_sleep_4_g0_1	0
1759	0	62.5	2020-08-12_TL_TL_sleep_4_g0_1	0
1760	0	67.5	2020-08-12_TL_TL_sleep_4_g0_1	0
1761	0	72.5	2020-08-12_TL_TL_sleep_4_g0_1	0.4
1762	0	77.5	2020-08-12_TL_TL_sleep_4_g0_1	0.4
1763	0	82.5	2020-08-12_TL_TL_sleep_4_g0_1	0.2
1764	0	87.5	2020-08-12_TL_TL_sleep_4_g0_1	0.4
1765	0	2.5	2020-08-12_TL_TL_sleep_4_g0_2	0.2
1766	0	7.5	2020-08-12_TL_TL_sleep_4_g0_2	0.2
1767	0	12.5	2020-08-12_TL_TL_sleep_4_g0_2	0
1768	0	17.5	2020-08-12_TL_TL_sleep_4_g0_2	0
1769	0	22.5	2020-08-12_TL_TL_sleep_4_g0_2	0
1770	0	27.5	2020-08-12_TL_TL_sleep_4_g0_2	0.2
1771	1	32.5	2020-08-12_TL_TL_sleep_4_g0_2	0
1772	1	37.5	2020-08-12_TL_TL_sleep_4_g0_2	0
1773	1	42.5	2020-08-12_TL_TL_sleep_4_g0_2	0
1774	1	47.5	2020-08-12_TL_TL_sleep_4_g0_2	0
1775	1	52.5	2020-08-12_TL_TL_sleep_4_g0_2	0
1776	1	57.5	2020-08-12_TL_TL_sleep_4_g0_2	0
1777	0	62.5	2020-08-12_TL_TL_sleep_4_g0_2	0
1778	0	67.5	2020-08-12_TL_TL_sleep_4_g0_2	0.4
1779	0	72.5	2020-08-12_TL_TL_sleep_4_g0_2	0
1780	0	77.5	2020-08-12_TL_TL_sleep_4_g0_2	0.4
1781	0	82.5	2020-08-12_TL_TL_sleep_4_g0_2	0
1782	0	87.5	2020-08-12_TL_TL_sleep_4_g0_2	0.8
1783	0	2.5	2020-08-12_TL_TL_sleep_5_g0_0	0
1784	0	7.5	2020-08-12_TL_TL_sleep_5_g0_0	0.2
1785	0	12.5	2020-08-12_TL_TL_sleep_5_g0_0	0
1786	0	17.5	2020-08-12_TL_TL_sleep_5_g0_0	0
1787	0	22.5	2020-08-12_TL_TL_sleep_5_g0_0	0
1788	0	27.5	2020-08-12_TL_TL_sleep_5_g0_0	0
1789	1	32.5	2020-08-12_TL_TL_sleep_5_g0_0	0
1790	1	37.5	2020-08-12_TL_TL_sleep_5_g0_0	0
1791	1	42.5	2020-08-12_TL_TL_sleep_5_g0_0	0
1792	1	47.5	2020-08-12_TL_TL_sleep_5_g0_0	0
1793	1	52.5	2020-08-12_TL_TL_sleep_5_g0_0	0
1794	1	57.5	2020-08-12_TL_TL_sleep_5_g0_0	0
1795	0	62.5	2020-08-12_TL_TL_sleep_5_g0_0	0
1796	0	67.5	2020-08-12_TL_TL_sleep_5_g0_0	0
1797	0	72.5	2020-08-12_TL_TL_sleep_5_g0_0	0
1798	0	77.5	2020-08-12_TL_TL_sleep_5_g0_0	0.2
1799	0	82.5	2020-08-12_TL_TL_sleep_5_g0_0	0
1800	0	87.5	2020-08-12_TL_TL_sleep_5_g0_0	0
1801	0	2.5	2020-08-12_TL_TL_sleep_6_g0_0	0.4
1802	0	7.5	2020-08-12_TL_TL_sleep_6_g0_0	0.2
1803	0	12.5	2020-08-12_TL_TL_sleep_6_g0_0	0
1804	0	17.5	2020-08-12_TL_TL_sleep_6_g0_0	0.2
1805	0	22.5	2020-08-12_TL_TL_sleep_6_g0_0	0
1806	0	27.5	2020-08-12_TL_TL_sleep_6_g0_0	0
1807	1	32.5	2020-08-12_TL_TL_sleep_6_g0_0	0
1808	1	37.5	2020-08-12_TL_TL_sleep_6_g0_0	0
1809	1	42.5	2020-08-12_TL_TL_sleep_6_g0_0	0
1810	1	47.5	2020-08-12_TL_TL_sleep_6_g0_0	0
1811	1	52.5	2020-08-12_TL_TL_sleep_6_g0_0	0
1812	1	57.5	2020-08-12_TL_TL_sleep_6_g0_0	0
1813	0	62.5	2020-08-12_TL_TL_sleep_6_g0_0	0.2
1814	0	67.5	2020-08-12_TL_TL_sleep_6_g0_0	0.4
1815	0	72.5	2020-08-12_TL_TL_sleep_6_g0_0	0.6
1816	0	77.5	2020-08-12_TL_TL_sleep_6_g0_0	0.6
1817	0	82.5	2020-08-12_TL_TL_sleep_6_g0_0	0.4
1818	0	87.5	2020-08-12_TL_TL_sleep_6_g0_0	0.4
1819	0	2.5	2020-08-12_TL_TL_sleep_6_g0_1	0
1820	0	7.5	2020-08-12_TL_TL_sleep_6_g0_1	0.2
1821	0	12.5	2020-08-12_TL_TL_sleep_6_g0_1	0.2
1822	0	17.5	2020-08-12_TL_TL_sleep_6_g0_1	0.2
1823	0	22.5	2020-08-12_TL_TL_sleep_6_g0_1	0
1824	0	27.5	2020-08-12_TL_TL_sleep_6_g0_1	0
1825	1	32.5	2020-08-12_TL_TL_sleep_6_g0_1	0
1826	1	37.5	2020-08-12_TL_TL_sleep_6_g0_1	0
1827	1	42.5	2020-08-12_TL_TL_sleep_6_g0_1	0
1828	1	47.5	2020-08-12_TL_TL_sleep_6_g0_1	0
1829	1	52.5	2020-08-12_TL_TL_sleep_6_g0_1	0
1830	1	57.5	2020-08-12_TL_TL_sleep_6_g0_1	0
1831	0	62.5	2020-08-12_TL_TL_sleep_6_g0_1	0
1832	0	67.5	2020-08-12_TL_TL_sleep_6_g0_1	0
1833	0	72.5	2020-08-12_TL_TL_sleep_6_g0_1	0.2
1834	0	77.5	2020-08-12_TL_TL_sleep_6_g0_1	0.4
1835	0	82.5	2020-08-12_TL_TL_sleep_6_g0_1	0.4
1836	0	87.5	2020-08-12_TL_TL_sleep_6_g0_1	0.2
