# Supplementary material for: Make Friends With The Googlebot
Source: eLife journal article supplement (doi:10.7554/elife.65998), 2005-03-14
Supplement: supp [file elife-65998-supp-v1.zip › elife_poa_e65998_Figure_5_source_data_2.csv]

	exp	animal	laserOn	swr_incidence
1	main-effect	GD	0	0.205524498520224
2	main-effect	GD	1	0.203147430862158
3	main-effect	GD	0	0.2
4	main-effect	GD	1	0.036087533922282
5	main-effect	BS	0	0.133333333333333
6	main-effect	BS	1	0.033335111205931
7	main-effect	BS	0	0.1
8	main-effect	BS	1	0.100005333617793
9	main-effect	BS	0	0.166666666666667
10	main-effect	BS	1	0
11	main-effect	BS	0	0.366666666666667
12	main-effect	BS	1	0.033335111205931
13	main-effect	BS	0	0.433333333333333
14	main-effect	BS	1	0
15	main-effect	BS	0	0.133333333333333
16	main-effect	BS	1	0.066670222411862
17	main-effect	GD	0	0.403758625752459
18	main-effect	GD	0	0.238110356213093
19	main-effect	GD	1	0
20	main-effect	GD	0	0.203070424823329
21	main-effect	GD	1	0
22	main-effect	GD	0	0.103525384424261
23	main-effect	GD	1	0
24	main-effect	GD	0	0.0342615941234514
25	main-effect	GD	0	0.234911941580756
26	main-effect	GD	1	0.0356562170179993
27	main-effect	GD	0	0.418211726656815
28	main-effect	GD	1	0.0377518045362568
29	main-effect	GD	0	0
30	main-effect	GD	1	0
31	main-effect	PT	0	0.166666666666667
32	main-effect	PT	1	0.166666666666667
33	main-effect	PT	0	0.4
34	main-effect	PT	1	0.0671321160042964
35	main-effect	PT	0	0.4
36	main-effect	PT	1	0.200010667235586
37	main-effect	PT	0	0.4
38	main-effect	PT	1	0.066670222411862
39	main-effect	PT	0	0.369454819034312
40	main-effect	PT	1	0.0339840139198521
41	main-effect	PT	0	0
42	main-effect	PT	1	0.0683041446955001
43	main-effect	PT	0	0.666666666666667
44	main-effect	PT	1	0.033335111205931
45	main-effect	PT	0	0.234905635050606
46	main-effect	PT	1	0.066670222411862
47	main-effect	PT	0	0
48	main-effect	PT	1	0
49	main-effect	BT	0	0.1088565705826
50	main-effect	BT	1	0
51	main-effect	BT	0	0.166666666666667
52	main-effect	BT	1	0
53	main-effect	OS	0	0.266666666666667
54	main-effect	OS	0	0.266666666666667
55	main-effect	OS	1	0
56	main-effect	OS	0	0.10387811634349
57	main-effect	OS	1	0
58	main-effect	OS	1	0
59	main-effect	OS	0	0.233333333333333
60	main-effect	OS	1	0.0336392260286875
61	main-effect	OS	0	0.2
62	main-effect	OS	1	0
63	main-effect	OS	0	0.366666666666667
64	main-effect	OS	1	0
65	main-effect	OS	0	0.2
66	main-effect	OS	1	0
67	main-effect	BD	0	0.512355076706874
68	main-effect	BD	1	0
69	main-effect	BD	0	0.0333333333333333
70	main-effect	BD	1	0
71	main-effect	BD	0	0
72	main-effect	BD	1	0
73	main-effect	BD	0	0.266666666666667
74	main-effect	BD	1	0.033335111205931
75	main-effect	BD	0	0.333333333333333
76	main-effect	BD	1	0.100005333617793
77	main-effect	BD	0	0.22563855711664
78	main-effect	BD	1	0
79	main-effect	BD	0	0.2
80	main-effect	BD	1	0
81	main-effect	BD	0	0.133333333333333
82	main-effect	BD	1	0.033335111205931
83	main-effect	BD	0	0.166666666666667
84	main-effect	BD	1	0
85	main-effect	BD	0	0.166666666666667
86	main-effect	BD	1	0.033335111205931
87	main-effect	BD	0	0.221082419525999
88	main-effect	BD	1	0.133340444823724
89	main-effect	BD	0	0.166666666666667
90	main-effect	BD	1	0.166675556029655
91	main-effect	BD	0	0.266666666666667
92	main-effect	BD	1	0.166675556029655
93	main-effect	BD	0	0.266666666666667
94	main-effect	BD	1	0
95	main-effect	BD	0	0
96	main-effect	BD	1	0
97	main-effect	BD	0	0.492394400339373
98	main-effect	BD	1	0
99	main-effect	BD	0	0.1
100	main-effect	BD	1	0.200010667235586
101	main-effect	BD	0	0.0666666666666667
102	main-effect	BD	1	0.100005333617793
103	main-effect	BD	0	0.0333333333333333
104	main-effect	BD	1	0
105	main-effect	BD	0	0.4
106	main-effect	BD	1	0.066670222411862
107	main-effect	BD	0	0.218156432706012
108	main-effect	BD	1	0.133340444823724
109	main-effect	BD	0	0.333333333333333
110	main-effect	BD	1	0.033335111205931
111	main-effect	BD	0	0.5
112	main-effect	BD	1	0.100005333617793
113	main-effect	BD	0	0
114	main-effect	BD	1	0.066670222411862
115	main-effect	BD	0	0
116	main-effect	BD	1	0
117	main-effect	BR	0	0.233333333333333
118	main-effect	BR	1	0
119	main-effect	BR	0	0.2
120	main-effect	BR	1	0
121	main-effect	BR	0	0.205232049036778
122	main-effect	BR	1	0
123	main-effect	BR	0	0.266666666666667
124	main-effect	BR	1	0
125	main-effect	BR	0	0.268875026887503
126	main-effect	BR	1	0.0335651566821514
127	main-effect	BR	0	0.2
128	main-effect	BR	1	0
129	main-effect	TL	0	0.266666666666667
130	main-effect	TL	0	0.2
131	main-effect	TL	1	0
132	main-effect	TL	0	0.3
133	main-effect	TL	1	0
134	main-effect	TL	0	0.20316393975512
135	main-effect	TL	1	0
136	main-effect	TL	0	0.233333333333333
137	main-effect	TL	0	0.166666666666667
138	main-effect	TL	1	0
139	main-effect	TL	0	0.333333333333333
140	main-effect	TL	1	0
141	main-effect	TL	0	0.166666666666667
142	main-effect	TL	1	0
143	main-effect	TL	0	0.417757477858854
144	main-effect	TL	1	0
145	main-effect	TL	0	0.266666666666667
146	main-effect	TL	1	0
147	main-effect	TL	0	0.1
148	main-effect	BR	0	0.139240858837617
149	main-effect	BR	0	0.141984949595343
150	main-effect	BR	1	0
151	main-effect	BR	0	0.166666666666667
152	main-effect	BR	1	0
153	main-effect	BR	0	0.276824271952165
154	main-effect	BR	1	0
155	main-effect	BR	0	0.0666666666666667
156	main-effect	BR	1	0
157	main-effect	TL	0	0.135292366804665
158	main-effect	TL	1	0
159	main-effect	TL	0	0.0666666666666667
160	main-effect	TL	1	0
161	main-effect	TL	0	0.335922173550832
162	main-effect	TL	1	0
163	main-effect	TL	0	0.168772953121625
164	main-effect	TL	0	0.1
165	main-effect	TL	1	0
166	main-effect	TL	0	0.0333333333333333
167	main-effect	TL	1	0
168	main-effect	TL	0	0
169	main-effect	TL	1	0
170	main-effect	TL	0	0
171	main-effect	TL	1	0
172	main-effect	TL	0	0.133333333333333
173	main-effect	TL	1	0
174	main-effect	TL	0	0.1
175	main-effect	TL	1	0
176	gfp-control	GD	1	0
177	gfp-control	GD	0	0.0338927903256419
178	gfp-control	GD	1	0
179	gfp-control	GD	0	0.0671393275324954
180	gfp-control	GD	1	0.0361909725238136
181	gfp-control	GD	0	0.134235395189003
182	gfp-control	GD	1	0
183	gfp-control	GD	0	0.133333333333333
184	gfp-control	GD	1	0
185	gfp-control	GD	0	0.0411143637141072
186	gfp-control	GD	1	0.101313016696385
187	gfp-control	GD	0	0.0333333333333333
188	gfp-control	GD	0	0.0754580302435785
189	gfp-control	GD	1	0.0333368892681887
190	gfp-control	GD	0	0.0395882818685669
191	gfp-control	GD	1	0.0365166077532061
192	gfp-control	GD	0	0.075668149762402
193	gfp-control	GD	0	0.136169285655928
194	gfp-control	GD	1	0.10515394537603
195	gfp-control	GD	0	0.112352817808671
196	gfp-control	GD	1	0.166684446340943
197	gfp-control	GD	1	0
198	gfp-control	GD	0	0.0372201048118151
199	gfp-control	GD	1	0
200	gfp-control	GD	1	0.0337892631237498
201	gfp-control	GD	0	0
202	gfp-control	GD	0	0
203	gfp-control	GD	1	0.0359639784791553
204	gfp-control	GD	0	0.176893467678026
205	gfp-control	GD	1	0
206	gfp-control	GD	0	0
207	gfp-control	GD	1	0.220309608436389
208	gfp-control	GD	0	0.0666666666666666
209	gfp-control	GD	1	0.183257586864096
210	gfp-control	GD	0	0.133333333333333
211	gfp-control	GD	1	0.0333377783704494
212	gfp-control	GD	0	0.0666666666666667
213	gfp-control	GD	1	0
214	gfp-control	OS	0	0.321072639473955
215	gfp-control	OS	1	0.246090673866577
216	gfp-control	OS	0	0.433333333333333
217	gfp-control	OS	1	0.157664049443446
218	gfp-control	OS	0	0.233333333333333
219	gfp-control	OS	1	0.302175664786463
220	gfp-control	OS	0	0.1
221	gfp-control	OS	1	0.266723567694441
222	gfp-control	OS	0	0.167812265062829
223	gfp-control	OS	1	0.282111321127317
224	gfp-control	OS	0	0.369137426508094
225	gfp-control	OS	1	0.355618776671408
226	gfp-control	OS	0	0.133333333333333
227	gfp-control	OS	1	0.0730545571432746
228	gfp-control	OS	0	0.0666666666666667
229	gfp-control	OS	1	0.0333404459618052
230	gfp-control	OS	0	0.2
231	gfp-control	OS	1	0.433425797503467
232	gfp-control	OS	0	0.40270618556701
233	gfp-control	OS	0	0.266666666666667
234	gfp-control	OS	1	0.266723567694441
235	gfp-control	OS	0	0.233333333333333
236	gfp-control	OS	1	0.167825783410757
237	gfp-control	OS	0	0.369137426508094
238	gfp-control	OS	1	0.366744905579857
239	gfp-control	OS	0	0.190956309196456
240	gfp-control	OS	0	0.2
241	gfp-control	OS	1	0.300064013656247
242	gfp-control	OS	0	0.3
243	gfp-control	OS	1	0.333404459618052
244	gfp-control	OS	0	0.244113380203102
245	gfp-control	OS	1	0.115912462908012
246	gfp-control	OS	0	0.308312094055743
247	gfp-control	OS	1	0.227838872349475
248	gfp-control	OS	0	0.114619311061528
249	gfp-control	OS	1	0.300064013656247
250	gfp-control	OS	0	0.46607009694258
251	gfp-control	OS	1	0.232680792976142
252	gfp-control	OS	0	0.134235395189003
253	gfp-control	OS	1	0.266723567694442
254	gfp-control	OS	0	0.167884388094982
255	gfp-control	OS	1	0.233383121732636
256	gfp-control	OS	0	0.109183019856752
257	gfp-control	OS	1	0.115203833983595
258	gfp-control	OS	0	0.13496005182466
259	gfp-control	OS	1	0.0333404459618052
260	gfp-control	OS	0	0.134231791457489
261	gfp-control	OS	1	0.366744905579857
262	gfp-control	OS	0	0.0666666666666667
263	gfp-control	OS	1	0.335732703051139
264	gfp-control	OS	0	0.183101892541161
265	gfp-control	OS	1	0.200042675770831
266	gfp-control	OS	0	0.133333333333333
267	gfp-control	OS	1	0.0666808919236103
268	gfp-control	OS	0	0.135641039552927
269	gfp-control	OS	1	0.300064013656247
270	gfp-control	OS	0	0.274243089074155
271	gfp-control	OS	1	0.233383121732636
272	gfp-control	OS	0	0
273	gfp-control	OS	1	0.107665805340224
274	gfp-control	OS	0	0.210343280233341
275	gfp-control	OS	1	0.366744905579857
276	gfp-control	OS	0	0.256861881696756
277	gfp-control	OS	1	0.300064013656247
278	gfp-control	OS	0	0.333333333333333
279	gfp-control	OS	1	0.366744905579857
280	gfp-control	OS	0	0.333333333333333
281	gfp-control	OS	1	0.100021337885416
282	gfp-control	OS	0	0.133333333333333
283	gfp-control	OS	1	0.0693962526023594
284	gfp-control	OS	0	0
285	gfp-control	OS	1	0
286	gfp-control	OS	0	0
287	gfp-control	OS	1	0
288	gfp-control	OS	0	0.0785274531976379
289	gfp-control	OS	1	0.589622641509425
290	gfp-control	GD	0	0.233333333333333
291	gfp-control	GD	1	0
292	gfp-control	GD	0	0.3
293	gfp-control	GD	1	0.266723567694441
294	gfp-control	GD	0	0.166666666666667
295	gfp-control	GD	1	0.200042675770831
296	gfp-control	GD	0	0.133333333333333
297	gfp-control	GD	1	0.200042675770831
298	gfp-control	GD	0	0.266666666666667
299	gfp-control	GD	1	0.166702229809026
300	gfp-control	GD	0	0.233333333333333
301	gfp-control	GD	1	0.200042675770831
302	gfp-control	GD	0	0.0666666666666667
303	gfp-control	GD	1	0.366744905579857
304	gfp-control	GD	0	0
305	gfp-control	GD	1	0.0666808919236103
306	gfp-control	GD	0	0.266666666666667
307	gfp-control	GD	1	0.233383121732636
308	gfp-control	GD	0	0.0333333333333333
309	gfp-control	GD	1	0.233383121732636
310	gfp-control	GD	0	0.3
311	gfp-control	GD	1	0.200042675770831
312	gfp-control	GD	0	0
313	gfp-control	GD	1	0.100021337885416
314	gfp-control	GD	0	0.266666666666667
315	gfp-control	GD	1	0.133361783847221
316	gfp-control	GD	0	0.466666666666667
317	gfp-control	GD	1	0.266723567694442
318	gfp-control	GD	0	0.633333333333333
319	gfp-control	GD	1	0.200042675770831
320	gfp-control	GD	0	0.233333333333333
321	gfp-control	GD	1	0
322	gfp-control	GD	0	0.2
323	gfp-control	GD	1	0.333404459618052
324	gfp-control	GD	0	0.2
325	gfp-control	GD	1	0.233383121732636
326	gfp-control	GD	0	0
327	gfp-control	GD	1	0
328	gfp-control	GD	0	0
329	gfp-control	GD	1	0.0333404459618052
330	gfp-control	GD	0	0.0666666666666667
331	gfp-control	GD	1	0.366754687791737
332	gfp-control	GD	0	0.3
333	gfp-control	GD	1	0.133361783847221
334	gfp-control	GD	0	0.333333333333333
335	gfp-control	GD	1	0.100021337885416
336	gfp-control	GD	0	0.366666666666667
337	gfp-control	GD	1	0.100021337885416
338	gfp-control	GD	0	0.2
339	gfp-control	GD	1	0.333404459618052
340	gfp-control	GD	0	0.133333333333333
341	gfp-control	GD	1	0.0666808919236103
342	gfp-control	GD	0	0.233333333333333
343	gfp-control	GD	1	0.433425797503467
344	gfp-control	GD	0	0.233333333333333
345	gfp-control	GD	1	0.200042675770831
346	gfp-control	GD	0	0.0333333333333333
347	gfp-control	GD	1	0
348	gfp-control	GD	0	0
349	gfp-control	GD	1	0
350	gfp-control	GD	0	0
351	gfp-control	GD	1	0
352	gfp-control	GD	0	0.1
353	gfp-control	GD	1	0
354	gfp-control	GD	0	0.0333333333333333
355	gfp-control	GD	1	0
356	gfp-control	GD	0	0
357	gfp-control	GD	1	0
358	gfp-control	GD	0	0.0335579478643722
359	gfp-control	GD	1	0
360	gfp-control	GD	0	0.1
361	gfp-control	GD	1	0.300064013656247
362	gfp-control	GD	0	0
363	gfp-control	GD	1	0
364	gfp-control	GD	0	0
365	gfp-control	GD	1	0
366	gfp-control	GD	0	0.133333333333333
367	gfp-control	GD	1	0.0333404459618052
368	gfp-control	GD	0	0.1
369	gfp-control	GD	1	0.233383121732636
