# Supplementary material for: Make Friends With The Googlebot
Source: eLife journal article supplement (doi:10.7554/elife.65998), 2005-03-14
Supplement: supp [file elife-65998-supp-v1.zip › elife_poa_e65998_Figure_6_figure_supplement_2_source_data_1.csv]

	exp	animal	compared.bands	relative.diff
1	main-effect	BD	theta_above_slow	0.673779661256456
2	main-effect	BD	theta_above_slow	0.55988493569622
3	main-effect	BD	theta_above_slow	0.111655799809069
4	main-effect	BD	theta_above_slow	0.192377717960955
5	main-effect	BD	theta_above_slow	0.329899187514807
6	main-effect	BD	theta_above_slow	0.38601925202847
7	main-effect	BD	theta_above_slow	-0.0644154179873819
8	main-effect	BD	theta_above_slow	0.0859161704242197
9	main-effect	BD	theta_above_slow	0.195200502004123
10	main-effect	BD	theta_above_slow	0.345714540214161
11	main-effect	BD	theta_above_slow	0.21428627259831
12	main-effect	BD	theta_above_slow	0.157626144924436
13	main-effect	BD	theta_above_slow	-0.00124063685384179
14	main-effect	BD	theta_above_slow	0.702701272250839
15	main-effect	BD	theta_above_slow	0.413121466000478
16	main-effect	BD	theta_above_slow	0.316044865387489
17	main-effect	BD	theta_above_slow	-0.0415052304797729
18	main-effect	BD	theta_above_slow	-0.00607009656171975
19	main-effect	BD	theta_above_slow	0.0684939181264559
20	main-effect	BD	theta_above_slow	0.0985031563599392
21	main-effect	BD	theta_above_slow	0.035903747089538
22	main-effect	BD	theta_above_slow	0.163213335239203
23	main-effect	BD	theta_above_slow	0.0990157816224766
24	main-effect	BD	theta_above_slow	2.16283789550948
25	main-effect	BD	theta_above_slow	0.124729480979193
26	main-effect	BR	theta_above_slow	0.178774818372679
27	main-effect	BR	theta_above_slow	0.193818127495456
28	main-effect	BR	theta_above_slow	0.119804286312021
29	main-effect	BR	theta_above_slow	-0.253109997125302
30	main-effect	BR	theta_above_slow	-0.011525267352491
31	main-effect	BR	theta_above_slow	0.0814684763493609
32	main-effect	BR	theta_above_slow	0.0875840142283266
33	main-effect	BR	theta_above_slow	0.0430336272138963
34	main-effect	BR	theta_above_slow	0.433487611665278
35	main-effect	BS	theta_above_slow	-0.00727286389811077
36	main-effect	BS	theta_above_slow	0.574199829881606
37	main-effect	BS	theta_above_slow	0.0491546509029002
38	main-effect	BS	theta_above_slow	0.167163970179129
39	main-effect	BS	theta_above_slow	0.154678694596178
40	main-effect	BS	theta_above_slow	0.0860423160168953
41	main-effect	BT	theta_above_slow	0.117922676501747
42	main-effect	BT	theta_above_slow	0.18895633210896
43	main-effect	GD	theta_above_slow	0.0915293714312035
44	main-effect	GD	theta_above_slow	0.191434984799553
45	main-effect	GD	theta_above_slow	0.0884684645725589
46	main-effect	GD	theta_above_slow	0.0415566280958153
47	main-effect	GD	theta_above_slow	0.137103634904914
48	main-effect	GD	theta_above_slow	0.155627120819567
49	gfp-control	GD	theta_above_slow	0.0635433391783948
50	gfp-control	GD	theta_above_slow	-0.00414980565449952
51	gfp-control	GD	theta_above_slow	0.0161992989748256
52	gfp-control	GD	theta_above_slow	-0.0181541062179775
53	gfp-control	GD	theta_above_slow	0.120847619926597
54	gfp-control	GD	theta_above_slow	0.190080393267195
55	gfp-control	GD	theta_above_slow	-0.178298190744261
56	gfp-control	GD	theta_above_slow	0.0281507907511731
57	gfp-control	GD	theta_above_slow	0.282706260937772
58	gfp-control	GD	theta_above_slow	0.0446067600584179
59	gfp-control	GD	theta_above_slow	0.141760798407581
60	gfp-control	GD	theta_above_slow	0.24678494583487
61	gfp-control	GD	theta_above_slow	0.300109038828571
62	gfp-control	GD	theta_above_slow	0.25513644474696
63	gfp-control	GD	theta_above_slow	-0.000948588882506485
64	gfp-control	GD	theta_above_slow	0.256007964661
65	gfp-control	GD	theta_above_slow	0.618508344901711
66	gfp-control	GD	theta_above_slow	-0.050480519830618
67	gfp-control	GD	theta_above_slow	-0.0480867178957833
68	gfp-control	GD	theta_above_slow	0.140569069425707
69	gfp-control	GD	theta_above_slow	-0.100883532577209
70	gfp-control	GD	theta_above_slow	0.403257755347449
71	gfp-control	GD	theta_above_slow	-0.0872107839520062
72	gfp-control	GD	theta_above_slow	-0.0977325770528505
73	gfp-control	GD	theta_above_slow	0.493190884906026
74	gfp-control	GD	theta_above_slow	0.131021855916661
75	gfp-control	GD	theta_above_slow	0.0867210037514923
76	gfp-control	GD	theta_above_slow	0.342277135865087
77	gfp-control	GD	theta_above_slow	0.189139353543744
78	gfp-control	GD	theta_above_slow	-0.0668258051959558
79	gfp-control	GD	theta_above_slow	0.321137375657758
80	gfp-control	GD	theta_above_slow	0.181828579828549
81	gfp-control	GD	theta_above_slow	-0.474667003404916
82	gfp-control	GD	theta_above_slow	0.271659386351869
83	gfp-control	GD	theta_above_slow	0.322780263049664
84	gfp-control	GD	theta_above_slow	0.183737530663501
85	gfp-control	GD	theta_above_slow	-0.493421463984879
86	gfp-control	GD	theta_above_slow	-0.171474109929319
87	gfp-control	GD	theta_above_slow	-0.0556848444922338
88	gfp-control	GD	theta_above_slow	0.34551464927428
89	gfp-control	GD	theta_above_slow	0.483337875838885
90	gfp-control	GD	theta_above_slow	0.310569631713838
91	gfp-control	GD	theta_above_slow	0.0118269158673279
92	gfp-control	GD	theta_above_slow	0.0438743932733257
93	gfp-control	GD	theta_above_slow	0.00414281650913395
94	gfp-control	GD	theta_above_slow	0.0204066188589138
95	gfp-control	GD	theta_above_slow	0.227532642907507
96	gfp-control	GD	theta_above_slow	0.0423108377318098
97	gfp-control	GD	theta_above_slow	0.128862160212389
98	gfp-control	GD	theta_above_slow	-0.174856927790444
99	gfp-control	GD	theta_above_slow	0.189398209141368
100	gfp-control	GD	theta_above_slow	0.249347736156441
101	gfp-control	GD	theta_above_slow	0.216246652429959
102	gfp-control	GD	theta_above_slow	0.596638504171192
103	gfp-control	GD	theta_above_slow	-0.393499986966699
104	main-effect	OS	theta_above_slow	0.157501148375022
105	main-effect	OS	theta_above_slow	0.376885230970462
106	main-effect	OS	theta_above_slow	0.0867970927063411
107	main-effect	OS	theta_above_slow	0.0396159001697427
108	main-effect	OS	theta_above_slow	0.0474186170134168
109	main-effect	OS	theta_above_slow	0.101152577013526
110	gfp-control	OS	theta_above_slow	0.581063755482306
111	gfp-control	OS	theta_above_slow	-0.603651590250946
112	gfp-control	OS	theta_above_slow	0.0352715469682892
113	gfp-control	OS	theta_above_slow	0.0136899412537481
114	gfp-control	OS	theta_above_slow	-0.20933779150152
115	gfp-control	OS	theta_above_slow	0.364894804560954
116	gfp-control	OS	theta_above_slow	0.329524436579479
117	gfp-control	OS	theta_above_slow	0.565357775332108
118	gfp-control	OS	theta_above_slow	-0.0997740678881094
119	gfp-control	OS	theta_above_slow	0.640318630097928
120	gfp-control	OS	theta_above_slow	-0.0045650472716261
121	gfp-control	OS	theta_above_slow	0.0294213868282682
122	gfp-control	OS	theta_above_slow	0.29056193441191
123	gfp-control	OS	theta_above_slow	0.00533038394340224
124	gfp-control	OS	theta_above_slow	0.102343884781073
125	gfp-control	OS	theta_above_slow	-0.101438439657198
126	gfp-control	OS	theta_above_slow	-0.0272284744976723
127	gfp-control	OS	theta_above_slow	0.339312089430802
128	gfp-control	OS	theta_above_slow	0.163630221729916
129	gfp-control	OS	theta_above_slow	0.000957850062020427
130	gfp-control	OS	theta_above_slow	0.276865944125911
131	gfp-control	OS	theta_above_slow	0.150880719574712
132	gfp-control	OS	theta_above_slow	0.100005806365155
133	gfp-control	OS	theta_above_slow	0.173331130360848
134	gfp-control	OS	theta_above_slow	0.152484425258617
135	gfp-control	OS	theta_above_slow	0.28768945924662
136	gfp-control	OS	theta_above_slow	0.416838362216167
137	gfp-control	OS	theta_above_slow	-0.0740296030172534
138	gfp-control	OS	theta_above_slow	-0.165045794254327
139	gfp-control	OS	theta_above_slow	0.137454499621844
140	gfp-control	OS	theta_above_slow	-0.0187961696098533
141	gfp-control	OS	theta_above_slow	0.226009549274034
142	gfp-control	OS	theta_above_slow	-0.078970468956145
143	gfp-control	OS	theta_above_slow	-0.398149748977309
144	gfp-control	OS	theta_above_slow	-0.00567559519647709
145	gfp-control	OS	theta_above_slow	-0.0134516843440107
146	gfp-control	OS	theta_above_slow	0.372764024334941
147	main-effect	PT	theta_above_slow	0.257786982120306
148	main-effect	PT	theta_above_slow	0.197863265403015
149	main-effect	PT	theta_above_slow	-0.0553542414310169
150	main-effect	PT	theta_above_slow	0.100264143998922
151	main-effect	PT	theta_above_slow	0.0739786964973455
152	main-effect	PT	theta_above_slow	-0.00472053605832556
153	main-effect	PT	theta_above_slow	0.129913733089563
154	main-effect	PT	theta_above_slow	0.0637241067512662
155	main-effect	PT	theta_above_slow	0.0613920718655141
156	main-effect	TL	theta_above_slow	0.734904058887212
157	main-effect	TL	theta_above_slow	0.460793166086825
158	main-effect	TL	theta_above_slow	0.518096130752847
159	main-effect	TL	theta_above_slow	0.683570147014828
160	main-effect	TL	theta_above_slow	0.492218333490081
161	main-effect	TL	theta_above_slow	0.494406010956316
162	main-effect	TL	theta_above_slow	0.210408274478493
163	main-effect	TL	theta_above_slow	0.135049169640903
164	main-effect	TL	theta_above_slow	0.156437071503619
165	main-effect	TL	theta_above_slow	0.172400629504837
166	main-effect	TL	theta_above_slow	0.0383144443566721
167	main-effect	TL	theta_above_slow	0.201663901511731
168	main-effect	TL	theta_above_slow	0.00758016481594304
169	main-effect	TL	theta_above_slow	0.221008508013036
170	main-effect	TL	theta_above_slow	0.294012217122681
171	main-effect	TL	theta_above_slow	0.211206072481369
172	main-effect	TL	theta_above_slow	0.0963304288076507
173	main-effect	BD	theta_above_supra	1.20809246743521
174	main-effect	BD	theta_above_supra	0.228238598433991
175	main-effect	BD	theta_above_supra	0.0513824932697364
176	main-effect	BD	theta_above_supra	0.662195824671999
177	main-effect	BD	theta_above_supra	0.480535741461306
178	main-effect	BD	theta_above_supra	0.739823166998718
179	main-effect	BD	theta_above_supra	0.122179973827505
180	main-effect	BD	theta_above_supra	0.5194693291602
181	main-effect	BD	theta_above_supra	0.356631658663908
182	main-effect	BD	theta_above_supra	0.227300498670784
183	main-effect	BD	theta_above_supra	0.200591916093336
184	main-effect	BD	theta_above_supra	0.364439350977175
185	main-effect	BD	theta_above_supra	0.354360098329984
186	main-effect	BD	theta_above_supra	0.718335998705116
187	main-effect	BD	theta_above_supra	0.281533100464747
188	main-effect	BD	theta_above_supra	0.193860939485118
189	main-effect	BD	theta_above_supra	0.151826571323133
190	main-effect	BD	theta_above_supra	0.108432452800658
191	main-effect	BD	theta_above_supra	0.213824100840039
192	main-effect	BD	theta_above_supra	0.35013735273421
193	main-effect	BD	theta_above_supra	0.379520416101322
194	main-effect	BD	theta_above_supra	0.159395604905769
195	main-effect	BD	theta_above_supra	0.169186392433208
196	main-effect	BD	theta_above_supra	0.575283999711218
197	main-effect	BD	theta_above_supra	-0.0269011124784555
198	main-effect	BR	theta_above_supra	0.252040980285965
199	main-effect	BR	theta_above_supra	0.509148431602213
200	main-effect	BR	theta_above_supra	0.3386710195996
201	main-effect	BR	theta_above_supra	0.24964866731276
202	main-effect	BR	theta_above_supra	0.0771373764286523
203	main-effect	BR	theta_above_supra	0.307955229347614
204	main-effect	BR	theta_above_supra	0.124641424487665
205	main-effect	BR	theta_above_supra	-0.0370733843795819
206	main-effect	BR	theta_above_supra	0.607822417540744
207	main-effect	BS	theta_above_supra	-0.121960045819481
208	main-effect	BS	theta_above_supra	1.16480152019635
209	main-effect	BS	theta_above_supra	0.28124374337938
210	main-effect	BS	theta_above_supra	0.417574874120558
211	main-effect	BS	theta_above_supra	0.3960844931207
212	main-effect	BS	theta_above_supra	-0.011855362886692
213	main-effect	BT	theta_above_supra	0.566622819746575
214	main-effect	BT	theta_above_supra	0.401055594477922
215	main-effect	GD	theta_above_supra	-0.0727035653252859
216	main-effect	GD	theta_above_supra	0.294921439354342
217	main-effect	GD	theta_above_supra	0.345772668183347
218	main-effect	GD	theta_above_supra	0.635782974512455
219	main-effect	GD	theta_above_supra	0.214506248563863
220	main-effect	GD	theta_above_supra	0.13944242723697
221	gfp-control	GD	theta_above_supra	-0.0181804010260578
222	gfp-control	GD	theta_above_supra	0.00631838444400046
223	gfp-control	GD	theta_above_supra	0.0245614467336264
224	gfp-control	GD	theta_above_supra	0.595316612466585
225	gfp-control	GD	theta_above_supra	0.0883868398265193
226	gfp-control	GD	theta_above_supra	0.0721384742065325
227	gfp-control	GD	theta_above_supra	0.0334461173162097
228	gfp-control	GD	theta_above_supra	-0.0388388087510929
229	gfp-control	GD	theta_above_supra	0.252729010498443
230	gfp-control	GD	theta_above_supra	0.27293030827283
231	gfp-control	GD	theta_above_supra	-0.00904581707468743
232	gfp-control	GD	theta_above_supra	0.00602103439095636
233	gfp-control	GD	theta_above_supra	0.408097890927907
234	gfp-control	GD	theta_above_supra	0.0366081401792133
235	gfp-control	GD	theta_above_supra	-0.00115292121456001
236	gfp-control	GD	theta_above_supra	0.0816037984974791
237	gfp-control	GD	theta_above_supra	0.559789018365619
238	gfp-control	GD	theta_above_supra	0.172192281514985
239	gfp-control	GD	theta_above_supra	0.186433807267955
240	gfp-control	GD	theta_above_supra	0.0717110676356185
241	gfp-control	GD	theta_above_supra	0.129296379763643
242	gfp-control	GD	theta_above_supra	0.116871693898352
243	gfp-control	GD	theta_above_supra	0.00407471270942672
244	gfp-control	GD	theta_above_supra	0.122078103507597
245	gfp-control	GD	theta_above_supra	0.0973585685822869
246	gfp-control	GD	theta_above_supra	0.340129409253818
247	gfp-control	GD	theta_above_supra	0.176302919741046
248	gfp-control	GD	theta_above_supra	0.0798928635450533
249	gfp-control	GD	theta_above_supra	0.0679747690759793
250	gfp-control	GD	theta_above_supra	0.0873840753504087
251	gfp-control	GD	theta_above_supra	-0.0879854464793404
252	gfp-control	GD	theta_above_supra	-0.10107648382157
253	gfp-control	GD	theta_above_supra	0.234920651117518
254	gfp-control	GD	theta_above_supra	0.0217245575743679
255	gfp-control	GD	theta_above_supra	-0.0898917791719498
256	gfp-control	GD	theta_above_supra	0.0690480554023427
257	gfp-control	GD	theta_above_supra	0.675055678526142
258	gfp-control	GD	theta_above_supra	-0.0480830241373198
259	gfp-control	GD	theta_above_supra	0.101111167242319
260	gfp-control	GD	theta_above_supra	0.239611625146669
261	gfp-control	GD	theta_above_supra	0.71597055556742
262	gfp-control	GD	theta_above_supra	0.110395892332217
263	gfp-control	GD	theta_above_supra	0.100957475149471
264	gfp-control	GD	theta_above_supra	-0.0185561875467197
265	gfp-control	GD	theta_above_supra	-0.185868228873597
266	gfp-control	GD	theta_above_supra	-0.120603235376258
267	gfp-control	GD	theta_above_supra	-0.12824296741668
268	gfp-control	GD	theta_above_supra	-0.0413201897800235
269	gfp-control	GD	theta_above_supra	0.689731129366717
270	gfp-control	GD	theta_above_supra	0.0117397761646583
271	gfp-control	GD	theta_above_supra	1.01656272210373
272	gfp-control	GD	theta_above_supra	0.155054200142359
273	gfp-control	GD	theta_above_supra	0.0531206588973205
274	gfp-control	GD	theta_above_supra	0.591257507067889
275	gfp-control	GD	theta_above_supra	0.305839114248355
276	main-effect	OS	theta_above_supra	0.530252434361119
277	main-effect	OS	theta_above_supra	0.522841936368867
278	main-effect	OS	theta_above_supra	1.02585171321601
279	main-effect	OS	theta_above_supra	0.691265110742183
280	main-effect	OS	theta_above_supra	0.478129443647168
281	main-effect	OS	theta_above_supra	0.935943283875
282	gfp-control	OS	theta_above_supra	-0.0128950504105561
283	gfp-control	OS	theta_above_supra	-0.0715269722311245
284	gfp-control	OS	theta_above_supra	0.156305814284847
285	gfp-control	OS	theta_above_supra	0.444639925379681
286	gfp-control	OS	theta_above_supra	0.0675185000278642
287	gfp-control	OS	theta_above_supra	0.292656939519153
288	gfp-control	OS	theta_above_supra	0.228763554345464
289	gfp-control	OS	theta_above_supra	0.144508375828284
290	gfp-control	OS	theta_above_supra	0.364153457116894
291	gfp-control	OS	theta_above_supra	-0.0362082054192516
292	gfp-control	OS	theta_above_supra	0.103221357429142
293	gfp-control	OS	theta_above_supra	0.0948075455340245
294	gfp-control	OS	theta_above_supra	0.205598853992868
295	gfp-control	OS	theta_above_supra	0.245578484916187
296	gfp-control	OS	theta_above_supra	-0.0852865841214019
297	gfp-control	OS	theta_above_supra	-0.0935699034249922
298	gfp-control	OS	theta_above_supra	-0.0211144306463567
299	gfp-control	OS	theta_above_supra	0.259675559699614
300	gfp-control	OS	theta_above_supra	0.340959186949096
301	gfp-control	OS	theta_above_supra	0.326091298479
302	gfp-control	OS	theta_above_supra	0.244698282595081
303	gfp-control	OS	theta_above_supra	-0.037205308744964
304	gfp-control	OS	theta_above_supra	0.00382635852675683
305	gfp-control	OS	theta_above_supra	0.0680739955979153
306	gfp-control	OS	theta_above_supra	0.0225590964038567
307	gfp-control	OS	theta_above_supra	-0.0566911894764122
308	gfp-control	OS	theta_above_supra	-0.105162407072079
309	gfp-control	OS	theta_above_supra	-0.209275102671434
310	gfp-control	OS	theta_above_supra	0.134302038137747
311	gfp-control	OS	theta_above_supra	-0.058634425539525
312	gfp-control	OS	theta_above_supra	-0.0742702316367438
313	gfp-control	OS	theta_above_supra	0.258633451136298
314	gfp-control	OS	theta_above_supra	0.366095292640486
315	gfp-control	OS	theta_above_supra	0.370028762534236
316	gfp-control	OS	theta_above_supra	0.0327660719974006
317	gfp-control	OS	theta_above_supra	0.213113436793998
318	gfp-control	OS	theta_above_supra	-0.0153045377347159
319	main-effect	PT	theta_above_supra	0.666569048007196
320	main-effect	PT	theta_above_supra	0.598149329796627
321	main-effect	PT	theta_above_supra	0.24014481636236
322	main-effect	PT	theta_above_supra	0.304042855317489
323	main-effect	PT	theta_above_supra	0.0165548556540731
324	main-effect	PT	theta_above_supra	0.321323561381456
325	main-effect	PT	theta_above_supra	0.396556347852
326	main-effect	PT	theta_above_supra	-0.100476294976531
327	main-effect	PT	theta_above_supra	0.781389384059406
328	main-effect	TL	theta_above_supra	0.898059484649695
329	main-effect	TL	theta_above_supra	0.430366668557097
330	main-effect	TL	theta_above_supra	0.80032129517094
331	main-effect	TL	theta_above_supra	0.922699915260432
332	main-effect	TL	theta_above_supra	1.13868698932693
333	main-effect	TL	theta_above_supra	0.806341249755478
334	main-effect	TL	theta_above_supra	0.310830222882819
335	main-effect	TL	theta_above_supra	0.441510777061008
336	main-effect	TL	theta_above_supra	1.24933155939793
337	main-effect	TL	theta_above_supra	0.513692961447308
338	main-effect	TL	theta_above_supra	0.359504424735366
339	main-effect	TL	theta_above_supra	0.424068698059173
340	main-effect	TL	theta_above_supra	0.247887112738049
341	main-effect	TL	theta_above_supra	0.604888891521993
342	main-effect	TL	theta_above_supra	0.0367059217748302
343	main-effect	TL	theta_above_supra	0.494957707278692
344	main-effect	TL	theta_above_supra	0.364785082328568
345	main-effect	BD	slow_gamma_above_supra_theta	0.496179875097809
346	main-effect	BD	slow_gamma_above_supra_theta	-0.0662450973836499
347	main-effect	BD	slow_gamma_above_supra_theta	0.305559675172885
348	main-effect	BD	slow_gamma_above_supra_theta	0.540544791186507
349	main-effect	BD	slow_gamma_above_supra_theta	0.685191896208602
350	main-effect	BD	slow_gamma_above_supra_theta	1.0774344157681
351	main-effect	BD	slow_gamma_above_supra_theta	0.0686381766280011
352	main-effect	BD	slow_gamma_above_supra_theta	0.718658256989963
353	main-effect	BD	slow_gamma_above_supra_theta	0.426375902634689
354	main-effect	BD	slow_gamma_above_supra_theta	0.108237791445864
355	main-effect	BD	slow_gamma_above_supra_theta	0.69883807222867
356	main-effect	BD	slow_gamma_above_supra_theta	0.468650926825324
357	main-effect	BD	slow_gamma_above_supra_theta	0.524595083556994
358	main-effect	BD	slow_gamma_above_supra_theta	0.219083178207818
359	main-effect	BD	slow_gamma_above_supra_theta	0.448820113455099
360	main-effect	BD	slow_gamma_above_supra_theta	0.465541997153185
361	main-effect	BD	slow_gamma_above_supra_theta	0.191038998694877
362	main-effect	BD	slow_gamma_above_supra_theta	0.300764994123735
363	main-effect	BD	slow_gamma_above_supra_theta	0.928906150047334
364	main-effect	BD	slow_gamma_above_supra_theta	0.612644328387258
365	main-effect	BD	slow_gamma_above_supra_theta	0.523801628872796
366	main-effect	BD	slow_gamma_above_supra_theta	0.758940779091761
367	main-effect	BD	slow_gamma_above_supra_theta	0.344252010531781
368	main-effect	BD	slow_gamma_above_supra_theta	-0.262172157461693
369	main-effect	BD	slow_gamma_above_supra_theta	-0.146952348617324
370	main-effect	BR	slow_gamma_above_supra_theta	0.853243332990221
371	main-effect	BR	slow_gamma_above_supra_theta	0.592469495168938
372	main-effect	BR	slow_gamma_above_supra_theta	0.64053457965464
373	main-effect	BR	slow_gamma_above_supra_theta	0.98054390472136
374	main-effect	BR	slow_gamma_above_supra_theta	0.383020437403863
375	main-effect	BR	slow_gamma_above_supra_theta	0.519700414841065
376	main-effect	BR	slow_gamma_above_supra_theta	0.545229300871538
377	main-effect	BR	slow_gamma_above_supra_theta	0.833403341869872
378	main-effect	BR	slow_gamma_above_supra_theta	0.876571972388975
379	main-effect	BS	slow_gamma_above_supra_theta	0.589863569617687
380	main-effect	BS	slow_gamma_above_supra_theta	1.39291419947642
381	main-effect	BS	slow_gamma_above_supra_theta	1.37377813914885
382	main-effect	BS	slow_gamma_above_supra_theta	1.05106086050477
383	main-effect	BS	slow_gamma_above_supra_theta	0.953207049751498
384	main-effect	BS	slow_gamma_above_supra_theta	0.0424225785766641
385	main-effect	BT	slow_gamma_above_supra_theta	1.34036561889635
386	main-effect	BT	slow_gamma_above_supra_theta	1.08877146610622
387	main-effect	GD	slow_gamma_above_supra_theta	0.0771318139514161
388	main-effect	GD	slow_gamma_above_supra_theta	0.630803959725208
389	main-effect	GD	slow_gamma_above_supra_theta	0.419367616893243
390	main-effect	GD	slow_gamma_above_supra_theta	0.835071799982259
391	main-effect	GD	slow_gamma_above_supra_theta	0.679443321560953
392	main-effect	GD	slow_gamma_above_supra_theta	0.688789028094245
393	gfp-control	GD	slow_gamma_above_supra_theta	0.114986661791249
394	gfp-control	GD	slow_gamma_above_supra_theta	0.158744779640147
395	gfp-control	GD	slow_gamma_above_supra_theta	0.199604271225057
396	gfp-control	GD	slow_gamma_above_supra_theta	0.232097216274244
397	gfp-control	GD	slow_gamma_above_supra_theta	0.293340789904148
398	gfp-control	GD	slow_gamma_above_supra_theta	0.44198391346068
399	gfp-control	GD	slow_gamma_above_supra_theta	0.261850890865876
400	gfp-control	GD	slow_gamma_above_supra_theta	-0.138618221693688
401	gfp-control	GD	slow_gamma_above_supra_theta	0.512724690219422
402	gfp-control	GD	slow_gamma_above_supra_theta	0.613840180478327
403	gfp-control	GD	slow_gamma_above_supra_theta	0.139547347030971
404	gfp-control	GD	slow_gamma_above_supra_theta	-0.0148094293618879
405	gfp-control	GD	slow_gamma_above_supra_theta	0.472793147889538
406	gfp-control	GD	slow_gamma_above_supra_theta	0.179713317823415
407	gfp-control	GD	slow_gamma_above_supra_theta	-0.04088963173926
408	gfp-control	GD	slow_gamma_above_supra_theta	-0.103760610999466
409	gfp-control	GD	slow_gamma_above_supra_theta	0.35944693503372
410	gfp-control	GD	slow_gamma_above_supra_theta	0.322981747194365
411	gfp-control	GD	slow_gamma_above_supra_theta	0.272371143111327
412	gfp-control	GD	slow_gamma_above_supra_theta	0.0779549523949665
413	gfp-control	GD	slow_gamma_above_supra_theta	0.345981651934402
414	gfp-control	GD	slow_gamma_above_supra_theta	-0.22810514382342
415	gfp-control	GD	slow_gamma_above_supra_theta	0.274960456615645
416	gfp-control	GD	slow_gamma_above_supra_theta	0.114606681784819
417	gfp-control	GD	slow_gamma_above_supra_theta	-0.212684423265607
418	gfp-control	GD	slow_gamma_above_supra_theta	0.513821802113517
419	gfp-control	GD	slow_gamma_above_supra_theta	0.398977464360438
420	gfp-control	GD	slow_gamma_above_supra_theta	0.0513271442733441
421	gfp-control	GD	slow_gamma_above_supra_theta	-0.0499693354307933
422	gfp-control	GD	slow_gamma_above_supra_theta	0.335258645506768
423	gfp-control	GD	slow_gamma_above_supra_theta	-0.107103258387179
424	gfp-control	GD	slow_gamma_above_supra_theta	-0.0534937983102051
425	gfp-control	GD	slow_gamma_above_supra_theta	-0.333415281692044
426	gfp-control	GD	slow_gamma_above_supra_theta	0.200848280187602
427	gfp-control	GD	slow_gamma_above_supra_theta	-0.159612613906043
428	gfp-control	GD	slow_gamma_above_supra_theta	0.00803956945217443
429	gfp-control	GD	slow_gamma_above_supra_theta	0.351683456718517
430	gfp-control	GD	slow_gamma_above_supra_theta	0.126730807748123
431	gfp-control	GD	slow_gamma_above_supra_theta	0.369488700276071
432	gfp-control	GD	slow_gamma_above_supra_theta	0.12177234656745
433	gfp-control	GD	slow_gamma_above_supra_theta	1.53593490858577
434	gfp-control	GD	slow_gamma_above_supra_theta	0.180148130390524
435	gfp-control	GD	slow_gamma_above_supra_theta	0.770599632464144
436	gfp-control	GD	slow_gamma_above_supra_theta	0.107269927662593
437	gfp-control	GD	slow_gamma_above_supra_theta	0.0734922654173751
438	gfp-control	GD	slow_gamma_above_supra_theta	0.0211289928131109
439	gfp-control	GD	slow_gamma_above_supra_theta	-0.262410980989809
440	gfp-control	GD	slow_gamma_above_supra_theta	0.201275527398284
441	gfp-control	GD	slow_gamma_above_supra_theta	0.799554289362819
442	gfp-control	GD	slow_gamma_above_supra_theta	0.115458205328839
443	gfp-control	GD	slow_gamma_above_supra_theta	0.43319609452611
444	gfp-control	GD	slow_gamma_above_supra_theta	-0.0931094167744408
445	gfp-control	GD	slow_gamma_above_supra_theta	0.0927419864835741
446	gfp-control	GD	slow_gamma_above_supra_theta	0.461029554414676
447	gfp-control	GD	slow_gamma_above_supra_theta	0.46113900584597
448	main-effect	OS	slow_gamma_above_supra_theta	0.440274497644758
449	main-effect	OS	slow_gamma_above_supra_theta	0.382590510144293
450	main-effect	OS	slow_gamma_above_supra_theta	0.92907719467809
451	main-effect	OS	slow_gamma_above_supra_theta	0.694010617304972
452	main-effect	OS	slow_gamma_above_supra_theta	0.568683101468507
453	main-effect	OS	slow_gamma_above_supra_theta	0.814083555821661
454	gfp-control	OS	slow_gamma_above_supra_theta	-0.323263012695829
455	gfp-control	OS	slow_gamma_above_supra_theta	-0.16044503519983
456	gfp-control	OS	slow_gamma_above_supra_theta	-0.0236730559491605
457	gfp-control	OS	slow_gamma_above_supra_theta	-0.0734459645789443
458	gfp-control	OS	slow_gamma_above_supra_theta	0.345942848724594
459	gfp-control	OS	slow_gamma_above_supra_theta	0.201157256128939
460	gfp-control	OS	slow_gamma_above_supra_theta	0.362761708273808
461	gfp-control	OS	slow_gamma_above_supra_theta	0.662703725779513
462	gfp-control	OS	slow_gamma_above_supra_theta	0.477652284191389
463	gfp-control	OS	slow_gamma_above_supra_theta	-1.27279155023363
464	gfp-control	OS	slow_gamma_above_supra_theta	0.242651396633331
465	gfp-control	OS	slow_gamma_above_supra_theta	0.227792893330625
466	gfp-control	OS	slow_gamma_above_supra_theta	0.417099510917769
467	gfp-control	OS	slow_gamma_above_supra_theta	0.511048154045996
468	gfp-control	OS	slow_gamma_above_supra_theta	0.320786901599277
469	gfp-control	OS	slow_gamma_above_supra_theta	0.642248499283035
470	gfp-control	OS	slow_gamma_above_supra_theta	0.405006601413993
471	gfp-control	OS	slow_gamma_above_supra_theta	0.242982363418736
472	gfp-control	OS	slow_gamma_above_supra_theta	0.142061912412069
473	gfp-control	OS	slow_gamma_above_supra_theta	0.154244238083667
474	gfp-control	OS	slow_gamma_above_supra_theta	0.280192281735776
475	gfp-control	OS	slow_gamma_above_supra_theta	0.0386886535480944
476	gfp-control	OS	slow_gamma_above_supra_theta	0.195992115539195
477	gfp-control	OS	slow_gamma_above_supra_theta	-0.049676052709259
478	gfp-control	OS	slow_gamma_above_supra_theta	1.03764782679465
479	gfp-control	OS	slow_gamma_above_supra_theta	0.148666657791006
480	gfp-control	OS	slow_gamma_above_supra_theta	-0.138342563613921
481	gfp-control	OS	slow_gamma_above_supra_theta	0.408791502567819
482	gfp-control	OS	slow_gamma_above_supra_theta	0.275690344358262
483	gfp-control	OS	slow_gamma_above_supra_theta	0.0802674144906437
484	gfp-control	OS	slow_gamma_above_supra_theta	0.310821171018391
485	gfp-control	OS	slow_gamma_above_supra_theta	-0.0163150940914694
486	gfp-control	OS	slow_gamma_above_supra_theta	0.337660067749948
487	gfp-control	OS	slow_gamma_above_supra_theta	0.362558079089247
488	gfp-control	OS	slow_gamma_above_supra_theta	-0.388510370120988
489	gfp-control	OS	slow_gamma_above_supra_theta	0.388167509729792
490	gfp-control	OS	slow_gamma_above_supra_theta	-0.499178031157436
491	main-effect	PT	slow_gamma_above_supra_theta	0.600057009363139
492	main-effect	PT	slow_gamma_above_supra_theta	0.805547188979153
493	main-effect	PT	slow_gamma_above_supra_theta	0.40276610433
494	main-effect	PT	slow_gamma_above_supra_theta	0.633131010755394
495	main-effect	PT	slow_gamma_above_supra_theta	0.699723844957576
496	main-effect	PT	slow_gamma_above_supra_theta	-0.0823245447728134
497	main-effect	PT	slow_gamma_above_supra_theta	0.277840671951841
498	main-effect	PT	slow_gamma_above_supra_theta	0.655588887910707
499	main-effect	PT	slow_gamma_above_supra_theta	0.680892184723852
500	main-effect	TL	slow_gamma_above_supra_theta	0.742537938860464
501	main-effect	TL	slow_gamma_above_supra_theta	0.520548389139027
502	main-effect	TL	slow_gamma_above_supra_theta	0.761434034604166
503	main-effect	TL	slow_gamma_above_supra_theta	0.911056096397493
504	main-effect	TL	slow_gamma_above_supra_theta	0.840231491098081
505	main-effect	TL	slow_gamma_above_supra_theta	0.561515519762942
506	main-effect	TL	slow_gamma_above_supra_theta	0.0118578934711042
507	main-effect	TL	slow_gamma_above_supra_theta	0.406041053754789
508	main-effect	TL	slow_gamma_above_supra_theta	0.931601489694573
509	main-effect	TL	slow_gamma_above_supra_theta	0.379408557068313
510	main-effect	TL	slow_gamma_above_supra_theta	0.801350195544392
511	main-effect	TL	slow_gamma_above_supra_theta	1.05146016383403
512	main-effect	TL	slow_gamma_above_supra_theta	0.854972923027436
513	main-effect	TL	slow_gamma_above_supra_theta	0.455494002016664
514	main-effect	TL	slow_gamma_above_supra_theta	-0.343780649798127
515	main-effect	TL	slow_gamma_above_supra_theta	0.93944125454783
516	main-effect	TL	slow_gamma_above_supra_theta	0.837843569964953
517	main-effect	BD	slow_gamma_above_supra	0.150600843917914
518	main-effect	BD	slow_gamma_above_supra	-0.169379977334563
519	main-effect	BD	slow_gamma_above_supra	0.2479261689494
520	main-effect	BD	slow_gamma_above_supra	0.169811992754505
521	main-effect	BD	slow_gamma_above_supra	0.632250487865981
522	main-effect	BD	slow_gamma_above_supra	0.731361507531403
523	main-effect	BD	slow_gamma_above_supra	0.31476948422446
524	main-effect	BD	slow_gamma_above_supra	0.0752948683346943
525	main-effect	BD	slow_gamma_above_supra	0.0734016407635245
526	main-effect	BD	slow_gamma_above_supra	-0.0988004210913118
527	main-effect	BD	slow_gamma_above_supra	0.457977735691699
528	main-effect	BD	slow_gamma_above_supra	-0.00230073581641577
529	main-effect	BD	slow_gamma_above_supra	0.401039356689498
530	main-effect	BD	slow_gamma_above_supra	0.0674734682062041
531	main-effect	BD	slow_gamma_above_supra	0.0707866386685492
532	main-effect	BD	slow_gamma_above_supra	0.630844155540155
533	main-effect	BD	slow_gamma_above_supra	-0.0140000513643059
534	main-effect	BD	slow_gamma_above_supra	0.0804253575515315
535	main-effect	BD	slow_gamma_above_supra	0.193495169185457
536	main-effect	BD	slow_gamma_above_supra	0.448427948642005
537	main-effect	BD	slow_gamma_above_supra	0.14144620510484
538	main-effect	BD	slow_gamma_above_supra	0.542165213465328
539	main-effect	BD	slow_gamma_above_supra	0.281999757987347
540	main-effect	BD	slow_gamma_above_supra	-0.704007099362849
541	main-effect	BD	slow_gamma_above_supra	-0.0266890649353329
542	main-effect	BR	slow_gamma_above_supra	0.274845802284455
543	main-effect	BR	slow_gamma_above_supra	-0.0318909624519232
544	main-effect	BR	slow_gamma_above_supra	-0.183887343039446
545	main-effect	BR	slow_gamma_above_supra	-0.0538959441997591
546	main-effect	BR	slow_gamma_above_supra	-0.0828329667106704
547	main-effect	BR	slow_gamma_above_supra	-0.130754128718952
548	main-effect	BR	slow_gamma_above_supra	0.125051597493435
549	main-effect	BR	slow_gamma_above_supra	0.47937098827229
550	main-effect	BR	slow_gamma_above_supra	0.00448752575473499
551	main-effect	BS	slow_gamma_above_supra	0.518047007183565
552	main-effect	BS	slow_gamma_above_supra	-0.274581790880942
553	main-effect	BS	slow_gamma_above_supra	0.596427602317027
554	main-effect	BS	slow_gamma_above_supra	0.520208497998508
555	main-effect	BS	slow_gamma_above_supra	0.467565786020355
556	main-effect	BS	slow_gamma_above_supra	0.0550426858657005
557	main-effect	BT	slow_gamma_above_supra	0.473635233122881
558	main-effect	BT	slow_gamma_above_supra	0.219190406653391
559	main-effect	GD	slow_gamma_above_supra	0.336910637461749
560	main-effect	GD	slow_gamma_above_supra	0.614037353374039
561	main-effect	GD	slow_gamma_above_supra	0.055327197446271
562	main-effect	GD	slow_gamma_above_supra	0.110062076277508
563	main-effect	GD	slow_gamma_above_supra	0.379646001317187
564	main-effect	GD	slow_gamma_above_supra	0.480432869109709
565	gfp-control	GD	slow_gamma_above_supra	0.236037543636932
566	gfp-control	GD	slow_gamma_above_supra	0.0665959185697318
567	gfp-control	GD	slow_gamma_above_supra	0.518391878180502
568	gfp-control	GD	slow_gamma_above_supra	-0.0998955645499269
569	gfp-control	GD	slow_gamma_above_supra	-0.174394270928422
570	gfp-control	GD	slow_gamma_above_supra	0.070458633821314
571	gfp-control	GD	slow_gamma_above_supra	-0.0380195110486934
572	gfp-control	GD	slow_gamma_above_supra	0.196885551318577
573	gfp-control	GD	slow_gamma_above_supra	0.363882175595069
574	gfp-control	GD	slow_gamma_above_supra	0.295438585589867
575	gfp-control	GD	slow_gamma_above_supra	-0.33147231785799
576	gfp-control	GD	slow_gamma_above_supra	-1.00957986648879
577	gfp-control	GD	slow_gamma_above_supra	-0.708527408637272
578	gfp-control	GD	slow_gamma_above_supra	-0.311028410302724
579	gfp-control	GD	slow_gamma_above_supra	0.131923871169063
580	gfp-control	GD	slow_gamma_above_supra	0.3381227118839
581	gfp-control	GD	slow_gamma_above_supra	-0.0691285077461217
582	gfp-control	GD	slow_gamma_above_supra	0.0443658881381328
583	gfp-control	GD	slow_gamma_above_supra	0.144671547219282
584	gfp-control	GD	slow_gamma_above_supra	-0.0821287582899526
585	gfp-control	GD	slow_gamma_above_supra	0.391867541582114
586	gfp-control	GD	slow_gamma_above_supra	0.0914885243441024
587	gfp-control	GD	slow_gamma_above_supra	0.325579179968381
588	gfp-control	GD	slow_gamma_above_supra	0.247421465119906
589	gfp-control	GD	slow_gamma_above_supra	-0.101805210732433
590	gfp-control	GD	slow_gamma_above_supra	-0.102285268575915
591	gfp-control	GD	slow_gamma_above_supra	0.0556237586662771
592	gfp-control	GD	slow_gamma_above_supra	-0.0693505447387111
593	gfp-control	GD	slow_gamma_above_supra	-0.321137872472498
594	gfp-control	GD	slow_gamma_above_supra	0.126451092503121
595	gfp-control	GD	slow_gamma_above_supra	0.222874155738818
596	gfp-control	GD	slow_gamma_above_supra	0.300436525853643
597	gfp-control	GD	slow_gamma_above_supra	0.356712393523862
598	gfp-control	GD	slow_gamma_above_supra	0.071441290715855
599	gfp-control	GD	slow_gamma_above_supra	0.0307915556955649
600	gfp-control	GD	slow_gamma_above_supra	-0.0193006686438864
601	gfp-control	GD	slow_gamma_above_supra	0.131499496568246
602	gfp-control	GD	slow_gamma_above_supra	-0.100658947543836
603	gfp-control	GD	slow_gamma_above_supra	-0.0493374459509557
604	gfp-control	GD	slow_gamma_above_supra	0.289864398071973
605	gfp-control	GD	slow_gamma_above_supra	0.360621532842787
606	gfp-control	GD	slow_gamma_above_supra	-0.0494608536689913
607	gfp-control	GD	slow_gamma_above_supra	0.306793597300905
608	gfp-control	GD	slow_gamma_above_supra	0.299308134458624
609	gfp-control	GD	slow_gamma_above_supra	0.221751194532475
610	gfp-control	GD	slow_gamma_above_supra	0.26331048564208
611	gfp-control	GD	slow_gamma_above_supra	-0.09174749242659
612	gfp-control	GD	slow_gamma_above_supra	-0.0315484975344589
613	gfp-control	GD	slow_gamma_above_supra	0.201419314584056
614	gfp-control	GD	slow_gamma_above_supra	-0.148379876079936
615	gfp-control	GD	slow_gamma_above_supra	-0.0802626465792962
616	gfp-control	GD	slow_gamma_above_supra	-0.179030717287031
617	gfp-control	GD	slow_gamma_above_supra	-0.0329633454610381
618	gfp-control	GD	slow_gamma_above_supra	-0.294716869552774
619	gfp-control	GD	slow_gamma_above_supra	0.284294037588568
620	main-effect	OS	slow_gamma_above_supra	0.288924468820897
621	main-effect	OS	slow_gamma_above_supra	0.0767607800937249
622	main-effect	OS	slow_gamma_above_supra	0.221568972660249
623	main-effect	OS	slow_gamma_above_supra	0.387457317571107
624	main-effect	OS	slow_gamma_above_supra	0.423696866493199
625	main-effect	OS	slow_gamma_above_supra	-0.080485819799371
626	gfp-control	OS	slow_gamma_above_supra	-0.117562988444504
627	gfp-control	OS	slow_gamma_above_supra	0.467500007028692
628	gfp-control	OS	slow_gamma_above_supra	0.159701107404734
629	gfp-control	OS	slow_gamma_above_supra	-0.155821310192914
630	gfp-control	OS	slow_gamma_above_supra	-0.369217680046876
631	gfp-control	OS	slow_gamma_above_supra	0.180199889204248
632	gfp-control	OS	slow_gamma_above_supra	0.0946108059449422
633	gfp-control	OS	slow_gamma_above_supra	-0.154670981390943
634	gfp-control	OS	slow_gamma_above_supra	0.346729219677613
635	gfp-control	OS	slow_gamma_above_supra	-0.335298437340457
636	gfp-control	OS	slow_gamma_above_supra	-0.00287951879747439
637	gfp-control	OS	slow_gamma_above_supra	0.156694674056785
638	gfp-control	OS	slow_gamma_above_supra	0.177699880460803
639	gfp-control	OS	slow_gamma_above_supra	0.232949209100006
640	gfp-control	OS	slow_gamma_above_supra	0.158595543578368
641	gfp-control	OS	slow_gamma_above_supra	0.136107894856069
642	gfp-control	OS	slow_gamma_above_supra	-0.175019577173837
643	gfp-control	OS	slow_gamma_above_supra	0.242860700678969
644	gfp-control	OS	slow_gamma_above_supra	-0.0908755192034683
645	gfp-control	OS	slow_gamma_above_supra	-0.132420443709089
646	gfp-control	OS	slow_gamma_above_supra	-0.13868088693402
647	gfp-control	OS	slow_gamma_above_supra	-0.127543043125037
648	gfp-control	OS	slow_gamma_above_supra	-0.245920253573955
649	gfp-control	OS	slow_gamma_above_supra	-0.0615276264038656
650	gfp-control	OS	slow_gamma_above_supra	0.518966979159583
651	gfp-control	OS	slow_gamma_above_supra	0.10075189482893
652	gfp-control	OS	slow_gamma_above_supra	0.0936156882633732
653	gfp-control	OS	slow_gamma_above_supra	0.193788045741893
654	gfp-control	OS	slow_gamma_above_supra	0.0838231994401681
655	gfp-control	OS	slow_gamma_above_supra	0.0418126992744163
656	gfp-control	OS	slow_gamma_above_supra	0.115889380019285
657	gfp-control	OS	slow_gamma_above_supra	-0.065559743869823
658	gfp-control	OS	slow_gamma_above_supra	-0.017598276562607
659	gfp-control	OS	slow_gamma_above_supra	-0.449459187653112
660	gfp-control	OS	slow_gamma_above_supra	-0.172110441139994
661	gfp-control	OS	slow_gamma_above_supra	0.0493025823879627
662	gfp-control	OS	slow_gamma_above_supra	-0.133509160136276
663	main-effect	PT	slow_gamma_above_supra	0.186724573502932
664	main-effect	PT	slow_gamma_above_supra	0.187546615657642
665	main-effect	PT	slow_gamma_above_supra	0.283305601270078
666	main-effect	PT	slow_gamma_above_supra	0.05646442096862
667	main-effect	PT	slow_gamma_above_supra	0.239977589373492
668	main-effect	PT	slow_gamma_above_supra	-0.062418499111649
669	main-effect	PT	slow_gamma_above_supra	-0.223811625255163
670	main-effect	PT	slow_gamma_above_supra	0.379229970815166
671	main-effect	PT	slow_gamma_above_supra	0.0580475902601965
672	main-effect	TL	slow_gamma_above_supra	-0.125339795495702
673	main-effect	TL	slow_gamma_above_supra	-0.278381907922869
674	main-effect	TL	slow_gamma_above_supra	-0.137853161433199
675	main-effect	TL	slow_gamma_above_supra	-0.0835472404698532
676	main-effect	TL	slow_gamma_above_supra	-0.360375413729273
677	main-effect	TL	slow_gamma_above_supra	-0.0745213653737462
678	main-effect	TL	slow_gamma_above_supra	-0.0328473250643402
679	main-effect	TL	slow_gamma_above_supra	-0.413967249943715
680	main-effect	TL	slow_gamma_above_supra	-0.274377775349757
681	main-effect	TL	slow_gamma_above_supra	-0.419305376504862
682	main-effect	TL	slow_gamma_above_supra	0.0353183914789508
683	main-effect	TL	slow_gamma_above_supra	0.0841283844856289
684	main-effect	TL	slow_gamma_above_supra	-0.0147260257222595
685	main-effect	TL	slow_gamma_above_supra	-0.0905393937126462
686	main-effect	TL	slow_gamma_above_supra	0.0650841162921854
687	main-effect	TL	slow_gamma_above_supra	-0.0891865654520618
688	main-effect	TL	slow_gamma_above_supra	0.0929549088926134
