# Supplementary material for: Make Friends With The Googlebot
Source: eLife journal article supplement (doi:10.7554/elife.65998), 2005-03-14
Supplement: supp [file elife-65998-supp-v1.zip › elife_poa_e65998_Figure_6_source_data_1.csv]

	exp	animal	laserOn	background_auc
1	main-effect	GD	0	-5.75237364012554
2	main-effect	GD	1	-5.85270562087169
3	main-effect	GD	0	-5.86495893465531
4	main-effect	GD	1	-6.05352871533535
5	main-effect	BS	0	-5.44264746143358
6	main-effect	BS	1	-5.73401141067319
7	main-effect	BS	0	-5.26779141136308
8	main-effect	BS	1	-5.45381162358939
9	main-effect	BS	0	-5.31915163499264
10	main-effect	BS	1	-5.67570623244603
11	main-effect	BS	0	-5.33672224966017
12	main-effect	BS	1	-5.69447699258205
13	main-effect	BS	0	-5.26857697693458
14	main-effect	BS	1	-5.67970513974234
15	main-effect	BS	0	-5.45275185861772
16	main-effect	BS	1	-5.4341074486851
17	main-effect	GD	0	-5.70571028276771
18	main-effect	GD	0	-5.8279090965849
19	main-effect	GD	1	-6.05180743508163
20	main-effect	GD	0	-5.7537515974854
21	main-effect	GD	1	-6.09895748203928
22	main-effect	GD	0	-5.84350570836222
23	main-effect	GD	1	-6.2123347463862
24	main-effect	GD	0	-5.78329910412367
25	main-effect	GD	0	-5.77331802235699
26	main-effect	GD	1	-6.12915303557179
27	main-effect	GD	0	-5.69609679696407
28	main-effect	GD	1	-6.10116815170824
29	main-effect	GD	0	-5.77338659466881
30	main-effect	GD	1	-6.10577755797959
31	main-effect	PT	0	-6.43582253919749
32	main-effect	PT	1	-6.65952881899261
33	main-effect	PT	0	-6.37799246065424
34	main-effect	PT	1	-6.75620550429329
35	main-effect	PT	0	-6.46107694542826
36	main-effect	PT	1	-6.57060913803764
37	main-effect	PT	0	-6.43189928798012
38	main-effect	PT	1	-6.68196854515588
39	main-effect	PT	0	-6.4448415065649
40	main-effect	PT	1	-6.76163879213448
41	main-effect	PT	0	-6.67028514815632
42	main-effect	PT	1	-6.84224657995281
43	main-effect	PT	0	-6.35225398533214
44	main-effect	PT	1	-6.66541815302747
45	main-effect	PT	0	-6.43217106895293
46	main-effect	PT	1	-6.63117913366528
47	main-effect	PT	0	-6.67844278723095
48	main-effect	PT	1	-6.95820940307698
49	main-effect	BT	0	-6.93781756681415
50	main-effect	BT	1	-7.07632586971158
51	main-effect	BT	0	-6.9302847455599
52	main-effect	BT	1	-7.0492661151431
53	main-effect	OS	0	-5.94413150666611
54	main-effect	OS	0	-5.82843988334042
55	main-effect	OS	1	-6.33038146286765
56	main-effect	OS	0	-5.95326736438199
57	main-effect	OS	1	-6.22559635855487
58	main-effect	OS	1	-6.24072629942117
59	main-effect	OS	0	-5.83027608931332
60	main-effect	OS	1	-6.34737143114961
61	main-effect	OS	0	-6.16483062427926
62	main-effect	OS	1	-6.38420275052721
63	main-effect	OS	0	-5.76632163686003
64	main-effect	OS	1	-6.25531292680034
65	main-effect	OS	0	-5.85849833442416
66	main-effect	OS	1	-6.29410807495185
67	main-effect	BD	0	-5.461592656493
68	main-effect	BD	1	-5.88088118312885
69	main-effect	BD	0	-5.66327746224113
70	main-effect	BD	1	-5.81229550934319
71	main-effect	BD	0	-5.80377776649613
72	main-effect	BD	1	-5.85236049475549
73	main-effect	BD	0	-5.60352690226387
74	main-effect	BD	1	-5.82788575463638
75	main-effect	BD	0	-5.52236583853278
76	main-effect	BD	1	-5.89718524943993
77	main-effect	BD	0	-5.51335745899036
78	main-effect	BD	1	-5.96188405591289
79	main-effect	BD	0	-5.5393643864827
80	main-effect	BD	1	-5.91241926583331
81	main-effect	BD	0	-5.48310072814451
82	main-effect	BD	1	-5.89078110978431
83	main-effect	BD	0	-5.5975024683089
84	main-effect	BD	1	-5.92854061096989
85	main-effect	BD	0	-5.69047188571221
86	main-effect	BD	1	-5.86508741638437
87	main-effect	BD	0	-5.58737585854396
88	main-effect	BD	1	-5.78395277548799
89	main-effect	BD	0	-5.62027190669465
90	main-effect	BD	1	-5.68931747403002
91	main-effect	BD	0	-5.56421982820467
92	main-effect	BD	1	-5.67978945414717
93	main-effect	BD	0	-5.53103524710781
94	main-effect	BD	1	-5.73742862052143
95	main-effect	BD	0	-5.80367107796849
96	main-effect	BD	1	-5.81277239524974
97	main-effect	BD	0	-5.46390462122372
98	main-effect	BD	1	-5.72780787684974
99	main-effect	BD	0	-5.58767474999371
100	main-effect	BD	1	-5.70981158862918
101	main-effect	BD	0	-5.62810078338146
102	main-effect	BD	1	-5.73171255999239
103	main-effect	BD	0	-5.66316445493283
104	main-effect	BD	1	-5.8774706700213
105	main-effect	BD	0	-5.49592403738109
106	main-effect	BD	1	-5.89289670377048
107	main-effect	BD	0	-5.58882875895682
108	main-effect	BD	1	-5.74839632010696
109	main-effect	BD	0	-5.4859414139458
110	main-effect	BD	1	-5.89489627700755
111	main-effect	BD	0	-5.48198500844279
112	main-effect	BD	1	-5.76636546966927
113	main-effect	BD	0	-5.76585567225089
114	main-effect	BD	1	-5.70428697374422
115	main-effect	BD	0	-5.77822418502848
116	main-effect	BD	1	-5.83646622260835
117	main-effect	BR	0	-6.18461987085254
118	main-effect	BR	1	-6.41434071989471
119	main-effect	BR	0	-6.21126318234536
120	main-effect	BR	1	-6.43240009572037
121	main-effect	BR	0	-6.27134885053175
122	main-effect	BR	1	-6.43399409779164
123	main-effect	BR	0	-6.23222148767718
124	main-effect	BR	1	-6.48580336222363
125	main-effect	BR	0	-6.30856649573855
126	main-effect	BR	1	-6.45615687527186
127	main-effect	BR	0	-6.20087911401305
128	main-effect	BR	1	-6.43803252445372
129	main-effect	TL	0	-6.21016860959031
130	main-effect	TL	0	-6.25326430534176
131	main-effect	TL	1	-6.64645738224885
132	main-effect	TL	0	-6.20057738285794
133	main-effect	TL	1	-6.66049544785881
134	main-effect	TL	0	-6.26076127668051
135	main-effect	TL	1	-6.67902716587105
136	main-effect	TL	0	-6.30235877147004
137	main-effect	TL	0	-6.29102759791277
138	main-effect	TL	1	-6.66008020303605
139	main-effect	TL	0	-6.20106821509643
140	main-effect	TL	1	-6.67361668619492
141	main-effect	TL	0	-6.29582405475554
142	main-effect	TL	1	-6.68242323213161
143	main-effect	TL	0	-6.37048967381145
144	main-effect	TL	1	-6.63653307367133
145	main-effect	TL	0	-6.29207752519523
146	main-effect	TL	1	-6.66426387948127
147	main-effect	TL	0	-6.26743687814275
148	main-effect	BR	0	-6.16900310224537
149	main-effect	BR	0	-6.25403555426306
150	main-effect	BR	1	-6.41516250795007
151	main-effect	BR	0	-6.21278267089207
152	main-effect	BR	1	-6.44245726599991
153	main-effect	BR	0	-6.31667525047675
154	main-effect	BR	1	-6.45004061271453
155	main-effect	BR	0	-6.20115950514776
156	main-effect	BR	1	-6.35709641405629
157	main-effect	TL	0	-6.22083421920524
158	main-effect	TL	1	-6.58615487850312
159	main-effect	TL	0	-6.17872624566604
160	main-effect	TL	1	-6.58861401609187
161	main-effect	TL	0	-6.12356126324886
162	main-effect	TL	1	-6.56414312986379
163	main-effect	TL	0	-6.28765280928326
164	main-effect	TL	0	-6.15240069992842
165	main-effect	TL	1	-6.59706337683633
166	main-effect	TL	0	-6.17446576197756
167	main-effect	TL	1	-6.58293293542317
168	main-effect	TL	0	-6.18490972437399
169	main-effect	TL	1	-6.55289495836797
170	main-effect	TL	0	-6.30718558465634
171	main-effect	TL	1	-6.44832449041394
172	main-effect	TL	0	-6.18323349996689
173	main-effect	TL	1	-6.61390498010326
174	main-effect	TL	0	-6.14079208478688
175	main-effect	TL	1	-6.60279530245424
176	gfp-control	GD	1	-5.94499147916531
177	gfp-control	GD	0	-5.85961649629434
178	gfp-control	GD	1	-5.96627756222307
179	gfp-control	GD	0	-5.7841937238079
180	gfp-control	GD	1	-5.9075104213332
181	gfp-control	GD	0	-5.8164832501588
182	gfp-control	GD	1	-5.95398097363102
183	gfp-control	GD	0	-5.76692616273755
184	gfp-control	GD	1	-5.83354398679444
185	gfp-control	GD	0	-6.0888216355176
186	gfp-control	GD	1	-5.89690139917462
187	gfp-control	GD	0	-5.9799327907993
188	gfp-control	GD	0	-5.99043059253785
189	gfp-control	GD	1	-5.92049905378963
190	gfp-control	GD	0	-6.00490067091584
191	gfp-control	GD	1	-6.00189012566454
192	gfp-control	GD	0	-6.00849034846289
193	gfp-control	GD	0	-5.96788224784581
194	gfp-control	GD	1	-6.05600244181278
195	gfp-control	GD	0	-6.09291064420722
196	gfp-control	GD	1	-6.01780987556941
197	gfp-control	GD	1	-6.01391528994253
198	gfp-control	GD	0	-5.99116754060208
199	gfp-control	GD	1	-6.14027295540177
200	gfp-control	GD	1	-6.02748460739633
201	gfp-control	GD	0	-5.81211395287085
202	gfp-control	GD	0	-5.96908296621655
203	gfp-control	GD	1	-5.85190408603711
204	gfp-control	GD	0	-5.82631464759055
205	gfp-control	GD	1	-5.80911775445458
206	gfp-control	GD	0	-5.95090529703333
207	gfp-control	GD	1	-6.00450551888059
208	gfp-control	GD	0	-5.89419811442934
209	gfp-control	GD	1	-6.06806673663567
210	gfp-control	GD	0	-5.99157738611382
211	gfp-control	GD	1	-6.10656730469668
212	gfp-control	GD	0	-6.01656516293457
213	gfp-control	GD	1	-6.09564285866492
214	gfp-control	OS	0	-6.17464252288647
215	gfp-control	OS	1	-6.4103972046704
216	gfp-control	OS	0	-6.29620477779099
217	gfp-control	OS	1	-6.38609545751399
218	gfp-control	OS	0	-6.34694307320029
219	gfp-control	OS	1	-6.29197113559519
220	gfp-control	OS	0	-6.33162021587356
221	gfp-control	OS	1	-6.35480581311339
222	gfp-control	OS	0	-6.31253255494909
223	gfp-control	OS	1	-6.31800005702456
224	gfp-control	OS	0	-6.32826057921045
225	gfp-control	OS	1	-6.3667903871999
226	gfp-control	OS	0	-6.2916951244444
227	gfp-control	OS	1	-6.47562869105349
228	gfp-control	OS	0	-6.34550260781981
229	gfp-control	OS	1	-6.34977639708791
230	gfp-control	OS	0	-6.39374469628802
231	gfp-control	OS	1	-6.29190335715441
232	gfp-control	OS	0	-6.35514407160372
233	gfp-control	OS	0	-6.3537668854741
234	gfp-control	OS	1	-6.40186522666164
235	gfp-control	OS	0	-6.36856449960618
236	gfp-control	OS	1	-6.39544614602295
237	gfp-control	OS	0	-6.3390181925854
238	gfp-control	OS	1	-6.40883174476204
239	gfp-control	OS	0	-6.42262904825452
240	gfp-control	OS	0	-6.36197890841572
241	gfp-control	OS	1	-6.38422892415173
242	gfp-control	OS	0	-6.40011324479457
243	gfp-control	OS	1	-6.32398695552826
244	gfp-control	OS	0	-6.37453270929035
245	gfp-control	OS	1	-6.42104419075895
246	gfp-control	OS	0	-6.40845022576525
247	gfp-control	OS	1	-6.39996582468427
248	gfp-control	OS	0	-6.4463667214311
249	gfp-control	OS	1	-6.39622160328747
250	gfp-control	OS	0	-6.32948922196931
251	gfp-control	OS	1	-6.49496920115433
252	gfp-control	OS	0	-6.37118816139343
253	gfp-control	OS	1	-6.45485039134513
254	gfp-control	OS	0	-6.52133886026763
255	gfp-control	OS	1	-6.42734369199923
256	gfp-control	OS	0	-6.53492710227482
257	gfp-control	OS	1	-6.47266412362887
258	gfp-control	OS	0	-6.42523715538505
259	gfp-control	OS	1	-6.43573172880247
260	gfp-control	OS	0	-6.3868352188984
261	gfp-control	OS	1	-6.44081863723
262	gfp-control	OS	0	-6.38208097824315
263	gfp-control	OS	1	-6.43001150479085
264	gfp-control	OS	0	-6.51859421650704
265	gfp-control	OS	1	-6.27169955812599
266	gfp-control	OS	0	-6.40871639337166
267	gfp-control	OS	1	-6.38448500911392
268	gfp-control	OS	0	-6.48340411615555
269	gfp-control	OS	1	-6.40341855250824
270	gfp-control	OS	0	-6.23170404845632
271	gfp-control	OS	1	-6.18386235031591
272	gfp-control	OS	0	-6.28163583062974
273	gfp-control	OS	1	-6.27832003385191
274	gfp-control	OS	0	-6.30020046085826
275	gfp-control	OS	1	-6.27797988351023
276	gfp-control	OS	0	-6.3214525754064
277	gfp-control	OS	1	-6.25157045462362
278	gfp-control	OS	0	-6.18371250817057
279	gfp-control	OS	1	-6.23902899811651
280	gfp-control	OS	0	-6.21310664085576
281	gfp-control	OS	1	-6.27181591747933
282	gfp-control	OS	0	-6.19643000054981
283	gfp-control	OS	1	-6.36230505623769
284	gfp-control	OS	0	-6.23352232512349
285	gfp-control	OS	1	-6.26990187291847
286	gfp-control	OS	0	-6.27824507188018
287	gfp-control	OS	1	-6.2673479258591
288	gfp-control	OS	0	-6.39733738893028
289	gfp-control	OS	1	-6.48104130151836
290	gfp-control	GD	0	-5.99788396349595
291	gfp-control	GD	1	-6.23333838390346
292	gfp-control	GD	0	-6.03346407902177
293	gfp-control	GD	1	-6.02810023584573
294	gfp-control	GD	0	-6.04741104950921
295	gfp-control	GD	1	-6.10597450048738
296	gfp-control	GD	0	-6.09417915188425
297	gfp-control	GD	1	-6.05718368969798
298	gfp-control	GD	0	-6.06092675186358
299	gfp-control	GD	1	-6.06318354377288
300	gfp-control	GD	0	-6.10045886848138
301	gfp-control	GD	1	-6.06439468555538
302	gfp-control	GD	0	-6.11238916574337
303	gfp-control	GD	1	-6.00411167678811
304	gfp-control	GD	0	-6.14022444221439
305	gfp-control	GD	1	-6.16719684970923
306	gfp-control	GD	0	-6.04719877546694
307	gfp-control	GD	1	-6.03661105181919
308	gfp-control	GD	0	-6.16578067648317
309	gfp-control	GD	1	-6.06056926493596
310	gfp-control	GD	0	-6.02852262443474
311	gfp-control	GD	1	-6.02596129471311
312	gfp-control	GD	0	-6.02630488814054
313	gfp-control	GD	1	-6.14044226706318
314	gfp-control	GD	0	-6.04225835943669
315	gfp-control	GD	1	-6.09870443596708
316	gfp-control	GD	0	-6.02376420379653
317	gfp-control	GD	1	-6.03824083525319
318	gfp-control	GD	0	-5.98188333149756
319	gfp-control	GD	1	-6.06080405062568
320	gfp-control	GD	0	-6.03139661442401
321	gfp-control	GD	1	-6.12991337023118
322	gfp-control	GD	0	-6.06250096737602
323	gfp-control	GD	1	-6.07847743460894
324	gfp-control	GD	0	-6.15583398338651
325	gfp-control	GD	1	-6.16509516555357
326	gfp-control	GD	0	-6.1284383787667
327	gfp-control	GD	1	-6.0948794044898
328	gfp-control	GD	0	-6.15169524202292
329	gfp-control	GD	1	-6.21338572157214
330	gfp-control	GD	0	-6.07873421703573
331	gfp-control	GD	1	-6.00321799637726
332	gfp-control	GD	0	-6.07067849425403
333	gfp-control	GD	1	-6.0869547091213
334	gfp-control	GD	0	-5.98353347014404
335	gfp-control	GD	1	-5.99709890830212
336	gfp-control	GD	0	-5.97530448118937
337	gfp-control	GD	1	-6.16666167668154
338	gfp-control	GD	0	-6.01812385246092
339	gfp-control	GD	1	-6.00593526630047
340	gfp-control	GD	0	-6.01445589201671
341	gfp-control	GD	1	-6.15976324952084
342	gfp-control	GD	0	-6.01284394413187
343	gfp-control	GD	1	-6.07123969867899
344	gfp-control	GD	0	-6.03736497024028
345	gfp-control	GD	1	-6.00475416676016
346	gfp-control	GD	0	-6.04124134584566
347	gfp-control	GD	1	-6.01910588382594
348	gfp-control	GD	0	-6.0209435312658
349	gfp-control	GD	1	-6.19627236298163
350	gfp-control	GD	0	-6.05231996862318
351	gfp-control	GD	1	-6.08107357462563
352	gfp-control	GD	0	-6.20651925064368
353	gfp-control	GD	1	-6.20963203645096
354	gfp-control	GD	0	-6.09516006647124
355	gfp-control	GD	1	-6.12209994927593
356	gfp-control	GD	0	-6.14421162634648
357	gfp-control	GD	1	-6.17273722109451
358	gfp-control	GD	0	-6.15973012265522
359	gfp-control	GD	1	-6.14443344918436
360	gfp-control	GD	0	-6.1484878452577
361	gfp-control	GD	1	-6.2465430345357
362	gfp-control	GD	0	-6.22545973934763
363	gfp-control	GD	1	-6.13205543286739
364	gfp-control	GD	0	-6.09293613571634
365	gfp-control	GD	1	-6.09117329316183
366	gfp-control	GD	0	-6.12910947735816
367	gfp-control	GD	1	-6.16723606972624
368	gfp-control	GD	0	-6.24602031612545
369	gfp-control	GD	1	-6.2709565588035
