# Supplementary material for: Make Friends With The Googlebot
Source: eLife journal article supplement (doi:10.7554/elife.65998), 2005-03-14
Supplement: supp [file elife-65998-supp-v1.zip › elife_poa_e65998_Figure_6_source_data_2.csv]

	exp	animal	laserOn	pow_theta
1	main-effect	GD	0	0.296942866629104
2	main-effect	GD	1	0.311999810799624
3	main-effect	GD	0	0.271345638442831
4	main-effect	GD	1	0.188759035169253
5	main-effect	BS	0	0.417429823742532
6	main-effect	BS	1	0.309242867302431
7	main-effect	BS	0	0.216170350203011
8	main-effect	BS	1	0.701370195945569
9	main-effect	BS	0	0.27271993561968
10	main-effect	BS	1	0.37196835397628
11	main-effect	BS	0	0.199924301530138
12	main-effect	BS	1	0.291970633170678
13	main-effect	BS	0	0.150327829132424
14	main-effect	BS	1	0.289430566297133
15	main-effect	BS	0	0.967182152587797
16	main-effect	BS	1	0.850691839109764
17	main-effect	GD	0	0.211903160925285
18	main-effect	GD	0	0.160018239530891
19	main-effect	GD	1	0.314248402194458
20	main-effect	GD	0	0.231608437607976
21	main-effect	GD	1	0.262360306382713
22	main-effect	GD	0	0.284055074090924
23	main-effect	GD	1	0.354340222870101
24	main-effect	GD	0	0.459359008551765
25	main-effect	GD	0	0.19210716743464
26	main-effect	GD	1	0.28134901535536
27	main-effect	GD	0	0.209159034962529
28	main-effect	GD	1	0.317355693125713
29	main-effect	GD	0	0.617480387707973
30	main-effect	GD	1	0.380590326983397
31	main-effect	PT	0	0.0684971631379314
32	main-effect	PT	1	0.234627163647477
33	main-effect	PT	0	0.17928376094732
34	main-effect	PT	1	0.309467829131928
35	main-effect	PT	0	0.180898271722415
36	main-effect	PT	1	0.214772985408753
37	main-effect	PT	0	0.160369288892177
38	main-effect	PT	1	0.270587030375858
39	main-effect	PT	0	0.156357810712572
40	main-effect	PT	1	0.212339099871973
41	main-effect	PT	0	0.204673937225641
42	main-effect	PT	1	0.276503983580351
43	main-effect	PT	0	0.0672638543024426
44	main-effect	PT	1	0.217116719135248
45	main-effect	PT	0	0.270111341779066
46	main-effect	PT	1	0.289381205547595
47	main-effect	PT	0	0.255789877670706
48	main-effect	PT	1	0.416259530541519
49	main-effect	BT	0	0.0969265255387182
50	main-effect	BT	1	0.259474819029824
51	main-effect	BT	0	0.137135686021333
52	main-effect	BT	1	0.293953935255799
53	main-effect	OS	0	0.11005746913913
54	main-effect	OS	0	0.200046953195017
55	main-effect	OS	1	0.313459988043734
56	main-effect	OS	0	0.116693073490596
57	main-effect	OS	1	0.289201328351149
58	main-effect	OS	1	0.272813292347278
59	main-effect	OS	0	0.161151494335393
60	main-effect	OS	1	0.305364111214656
61	main-effect	OS	0	0.191530154034525
62	main-effect	OS	1	0.355519473656688
63	main-effect	OS	0	0.131744628677694
64	main-effect	OS	1	0.250565446447776
65	main-effect	OS	0	0.096339583472238
66	main-effect	OS	1	0.277781038186369
67	main-effect	BD	0	0.236625209625748
68	main-effect	BD	1	0.690606140943151
69	main-effect	BD	0	0.855201333259686
70	main-effect	BD	1	1.11072637990875
71	main-effect	BD	0	0.618389888474729
72	main-effect	BD	1	0.636336992532477
73	main-effect	BD	0	0.219985777355102
74	main-effect	BD	1	0.335984163932504
75	main-effect	BD	0	0.109919959267832
76	main-effect	BD	1	0.340826387215223
77	main-effect	BD	0	0.211167028787258
78	main-effect	BD	1	0.476813795716905
79	main-effect	BD	0	0.344212678125734
80	main-effect	BD	1	0.291773869904461
81	main-effect	BD	0	0.191060008545426
82	main-effect	BD	1	0.2807560045153
83	main-effect	BD	0	0.211645933019053
84	main-effect	BD	1	0.339398935188452
85	main-effect	BD	0	0.23455582601054
86	main-effect	BD	1	0.342144227954377
87	main-effect	BD	0	0.217124924503783
88	main-effect	BD	1	0.32551536489982
89	main-effect	BD	0	0.242657077945037
90	main-effect	BD	1	0.341715043727576
91	main-effect	BD	0	0.203663767581489
92	main-effect	BD	1	0.220662751254774
93	main-effect	BD	0	0.256775055960941
94	main-effect	BD	1	0.572115739760092
95	main-effect	BD	0	0.852567682432
96	main-effect	BD	1	0.937361398077448
97	main-effect	BD	0	0.21347860167295
98	main-effect	BD	1	0.291999591637104
99	main-effect	BD	0	0.281923230068102
100	main-effect	BD	1	0.229843632157491
101	main-effect	BD	0	0.254903990916361
102	main-effect	BD	1	0.301021152783544
103	main-effect	BD	0	0.472371512932706
104	main-effect	BD	1	0.536184546152503
105	main-effect	BD	0	0.247951191152254
106	main-effect	BD	1	0.329485821676281
107	main-effect	BD	0	0.253516753061136
108	main-effect	BD	1	0.365447845433367
109	main-effect	BD	0	0.328087789666512
110	main-effect	BD	1	0.426139315534051
111	main-effect	BD	0	0.257643084291581
112	main-effect	BD	1	0.296690988830018
113	main-effect	BD	0	0.729442310254926
114	main-effect	BD	1	0.797560880641413
115	main-effect	BD	0	0.856659639406404
116	main-effect	BD	1	0.94373069215309
117	main-effect	BR	0	0.100074146916481
118	main-effect	BR	1	0.218411315625797
119	main-effect	BR	0	0.153037713591573
120	main-effect	BR	1	0.227281378536468
121	main-effect	BR	0	0.0654186839994599
122	main-effect	BR	1	0.166915670883071
123	main-effect	BR	0	0.145354971874792
124	main-effect	BR	1	0.153469999280865
125	main-effect	BR	0	0.145362352551773
126	main-effect	BR	1	0.18225553202284
127	main-effect	BR	0	0.202269144886003
128	main-effect	BR	1	0.275493876916085
129	main-effect	TL	0	0.0562401038248943
130	main-effect	TL	0	0.0653138485093869
131	main-effect	TL	1	0.423113769733739
132	main-effect	TL	0	0.0921809288883138
133	main-effect	TL	1	0.2553269600889
134	main-effect	TL	0	0.125190386287367
135	main-effect	TL	1	0.375605752630285
136	main-effect	TL	0	0.114951627197625
137	main-effect	TL	0	0.112703395692919
138	main-effect	TL	1	0.405748297333785
139	main-effect	TL	0	0.0746573250977471
140	main-effect	TL	1	0.420931650183273
141	main-effect	TL	0	0.080706874039544
142	main-effect	TL	1	0.408316854163613
143	main-effect	TL	0	0.0904956531439671
144	main-effect	TL	1	0.239480927746603
145	main-effect	TL	0	0.109707892894095
146	main-effect	TL	1	0.27113575741514
147	main-effect	TL	0	0.127141468038239
148	main-effect	BR	0	0.134537227436391
149	main-effect	BR	0	0.124732423401265
150	main-effect	BR	1	0.188479811030865
151	main-effect	BR	0	0.206665418144302
152	main-effect	BR	1	0.22037112219328
153	main-effect	BR	0	0.177391542872272
154	main-effect	BR	1	0.183403235112161
155	main-effect	BR	0	0.154820984548517
156	main-effect	BR	1	0.470215582755913
157	main-effect	TL	0	0.108458610346023
158	main-effect	TL	1	0.354050393394934
159	main-effect	TL	0	0.0778368894690749
160	main-effect	TL	1	0.22433951822183
161	main-effect	TL	0	0.172039383999015
162	main-effect	TL	1	0.273997519224566
163	main-effect	TL	0	0.0760500393903065
164	main-effect	TL	0	0.145562854776017
165	main-effect	TL	1	0.2917134268959
166	main-effect	TL	0	0.14930181335978
167	main-effect	TL	1	0.164385138066359
168	main-effect	TL	0	0.0872012509519067
169	main-effect	TL	1	0.297429749000322
170	main-effect	TL	0	0.774310407221424
171	main-effect	TL	1	0.681790261589811
172	main-effect	TL	1	0.200324252698955
173	main-effect	TL	0	0.113240142644088
174	main-effect	TL	1	0.228037342338859
175	gfp-control	GD	1	0.328229513359699
176	gfp-control	GD	0	0.238096831271707
177	gfp-control	GD	1	0.157420328255546
178	gfp-control	GD	0	0.151253149677793
179	gfp-control	GD	1	0.297780597423292
180	gfp-control	GD	0	0.239406940865313
181	gfp-control	GD	1	0.266760569620859
182	gfp-control	GD	0	0.259509824190022
183	gfp-control	GD	1	0.267109561995491
184	gfp-control	GD	0	0.241773892169083
185	gfp-control	GD	1	0.252302964119844
186	gfp-control	GD	0	0.358646822099276
187	gfp-control	GD	0	0.234040224479504
188	gfp-control	GD	1	0.34467477815115
189	gfp-control	GD	0	0.172003704379268
190	gfp-control	GD	1	0.384124147480462
191	gfp-control	GD	0	0.20771976131595
192	gfp-control	GD	0	0.217727213563494
193	gfp-control	GD	1	0.237864391647106
194	gfp-control	GD	0	0.300673692387597
195	gfp-control	GD	1	0.317931663986697
196	gfp-control	GD	1	0.673263518154596
197	gfp-control	GD	0	0.221785275864595
198	gfp-control	GD	1	0.238017934623637
199	gfp-control	GD	1	0.208844084739925
200	gfp-control	GD	0	0.387589351091632
201	gfp-control	GD	0	0.272893142817223
202	gfp-control	GD	1	0.203876912575949
203	gfp-control	GD	0	0.236565695089705
204	gfp-control	GD	1	0.25579966724415
205	gfp-control	GD	0	0.726125670957872
206	gfp-control	GD	1	0.692523693095556
207	gfp-control	GD	0	0.26590769554438
208	gfp-control	GD	1	0.233757006993468
209	gfp-control	GD	0	0.17059519947191
210	gfp-control	GD	1	0.230628344272261
211	gfp-control	GD	0	0.184209900350921
212	gfp-control	GD	1	0.147587319456526
213	gfp-control	OS	0	0.167911827202672
214	gfp-control	OS	1	0.142147206798596
215	gfp-control	OS	0	0.18150321715576
216	gfp-control	OS	1	0.157889072739722
217	gfp-control	OS	0	0.16159855301111
218	gfp-control	OS	1	0.198651694696527
219	gfp-control	OS	0	0.161636625911573
220	gfp-control	OS	1	0.215476022875436
221	gfp-control	OS	0	0.146304030266451
222	gfp-control	OS	1	0.131971091982978
223	gfp-control	OS	0	0.150029236951751
224	gfp-control	OS	1	0.137603311995592
225	gfp-control	OS	0	0.278020015926021
226	gfp-control	OS	1	0.194913746808061
227	gfp-control	OS	0	0.269892392079948
228	gfp-control	OS	1	0.417158123394154
229	gfp-control	OS	0	0.096661899005297
230	gfp-control	OS	1	0.178994531521663
231	gfp-control	OS	0	0.188270832699237
232	gfp-control	OS	0	0.120881667762479
233	gfp-control	OS	1	0.166794806965173
234	gfp-control	OS	0	0.0621504178653529
235	gfp-control	OS	1	0.0688496053812306
236	gfp-control	OS	0	0.0859227803896871
237	gfp-control	OS	1	0.103158573742608
238	gfp-control	OS	0	0.1073794440096
239	gfp-control	OS	0	0.112902448447441
240	gfp-control	OS	1	0.119351158745198
241	gfp-control	OS	0	0.0996887907139108
242	gfp-control	OS	1	0.127137771283008
243	gfp-control	OS	0	0.161651481167332
244	gfp-control	OS	1	0.0885574486837593
245	gfp-control	OS	0	0.195623106234978
246	gfp-control	OS	1	0.125361765134921
247	gfp-control	OS	0	0.185876091993805
248	gfp-control	OS	1	0.09686360698195
249	gfp-control	OS	0	0.146102852347004
250	gfp-control	OS	1	0.117417352154781
251	gfp-control	OS	0	0.23575295321469
252	gfp-control	OS	1	0.120013757054343
253	gfp-control	OS	0	0.137587322273022
254	gfp-control	OS	1	0.135467684266177
255	gfp-control	OS	0	0.161968474863189
256	gfp-control	OS	1	0.12556363346109
257	gfp-control	OS	0	0.101363562647851
258	gfp-control	OS	1	0.141022742770486
259	gfp-control	OS	0	0.21360759868619
260	gfp-control	OS	1	0.12773631645184
261	gfp-control	OS	0	0.168702485157563
262	gfp-control	OS	1	0.11069883185246
263	gfp-control	OS	0	0.132315141835162
264	gfp-control	OS	1	0.0924075905713568
265	gfp-control	OS	0	0.141369050571653
266	gfp-control	OS	1	0.159429193146783
267	gfp-control	OS	0	0.112180807949518
268	gfp-control	OS	1	0.0316779953226662
269	gfp-control	OS	0	0.140405556420327
270	gfp-control	OS	1	0.248392352884971
271	gfp-control	OS	0	0.715388715517836
272	gfp-control	OS	1	0.349571424875407
273	gfp-control	OS	0	0.159792275861228
274	gfp-control	OS	1	0.123863043471588
275	gfp-control	OS	0	0.178536231189303
276	gfp-control	OS	1	0.192472463575792
277	gfp-control	OS	0	0.122836460445745
278	gfp-control	OS	1	0.102920619561349
279	gfp-control	OS	0	0.132869173468089
280	gfp-control	OS	1	0.224835766824006
281	gfp-control	OS	0	0.119989024507257
282	gfp-control	OS	1	0.225403363473813
283	gfp-control	OS	0	0.307437063785881
284	gfp-control	OS	1	0.604931646972226
285	gfp-control	OS	0	0.804871731630575
286	gfp-control	OS	1	0.704680735887317
287	gfp-control	OS	0	0.36807692174915
288	gfp-control	OS	1	0.0605500456204924
289	gfp-control	GD	0	0.196847155592677
290	gfp-control	GD	1	0.316967791659719
291	gfp-control	GD	0	0.195425245607757
292	gfp-control	GD	1	0.220423628072503
293	gfp-control	GD	0	0.240411460991195
294	gfp-control	GD	1	0.272839677783475
295	gfp-control	GD	0	0.252059857759222
296	gfp-control	GD	1	0.2227220415815
297	gfp-control	GD	0	0.166054842028135
298	gfp-control	GD	1	0.193559259811558
299	gfp-control	GD	0	0.294273425635118
300	gfp-control	GD	1	0.235561158139901
301	gfp-control	GD	0	0.193255740992638
302	gfp-control	GD	1	0.176718182577567
303	gfp-control	GD	0	0.658338523187151
304	gfp-control	GD	1	0.243416458350308
305	gfp-control	GD	0	0.143627240591389
306	gfp-control	GD	1	0.193806348887962
307	gfp-control	GD	0	0.218563485182328
308	gfp-control	GD	1	0.242448640613005
309	gfp-control	GD	0	0.205169145354808
310	gfp-control	GD	1	0.250290721101296
311	gfp-control	GD	0	0.743363410897254
312	gfp-control	GD	1	0.471483917429167
313	gfp-control	GD	0	0.311961994422396
314	gfp-control	GD	1	0.311962989684484
315	gfp-control	GD	0	0.262937777142366
316	gfp-control	GD	1	0.1981151663809
317	gfp-control	GD	0	0.159298709692374
318	gfp-control	GD	1	0.281008134089104
319	gfp-control	GD	0	0.279112648614538
320	gfp-control	GD	1	0.568504491409042
321	gfp-control	GD	0	0.104210412611494
322	gfp-control	GD	1	0.139359613583545
323	gfp-control	GD	0	0.255035502561769
324	gfp-control	GD	1	0.283639888088189
325	gfp-control	GD	0	0.613576224978992
326	gfp-control	GD	1	0.528513153442932
327	gfp-control	GD	0	0.605251454752205
328	gfp-control	GD	1	0.537861196179486
329	gfp-control	GD	0	0.210792607875232
330	gfp-control	GD	1	0.161146016154422
331	gfp-control	GD	0	0.253737679374572
332	gfp-control	GD	1	0.122498569922186
333	gfp-control	GD	0	0.235306691748054
334	gfp-control	GD	1	0.210962955384128
335	gfp-control	GD	0	0.110153820901933
336	gfp-control	GD	1	0.290194205279471
337	gfp-control	GD	0	0.201395767638506
338	gfp-control	GD	1	0.143752915586298
339	gfp-control	GD	0	0.232964731941264
340	gfp-control	GD	1	0.48711133908196
341	gfp-control	GD	0	0.192210681857077
342	gfp-control	GD	1	0.296382555280785
343	gfp-control	GD	0	0.292847202282158
344	gfp-control	GD	1	0.229521980706537
345	gfp-control	GD	0	0.409185696912957
346	gfp-control	GD	1	0.618628450312475
347	gfp-control	GD	0	0.676534194720188
348	gfp-control	GD	1	0.606594264383862
349	gfp-control	GD	0	0.671786076559138
350	gfp-control	GD	1	0.551567950618074
351	gfp-control	GD	0	0.396231799273391
352	gfp-control	GD	1	0.58634265726433
353	gfp-control	GD	0	0.746984404845551
354	gfp-control	GD	1	0.698010331917232
355	gfp-control	GD	0	0.547260192157216
356	gfp-control	GD	1	0.529898565589435
357	gfp-control	GD	0	0.677599688172337
358	gfp-control	GD	1	0.635944282671585
359	gfp-control	GD	0	0.303377475431868
360	gfp-control	GD	1	0.255671769439461
361	gfp-control	GD	0	0.643003191879823
362	gfp-control	GD	1	0.579169331360466
363	gfp-control	GD	0	0.654335071349808
364	gfp-control	GD	1	0.493343232177407
365	gfp-control	GD	0	0.514955089383274
366	gfp-control	GD	1	0.382561350682531
367	gfp-control	GD	0	0.361339952870232
368	gfp-control	GD	1	0.279943996355152
