# Supplementary material for: Make Friends With The Googlebot
Source: eLife journal article supplement (doi:10.7554/elife.65998), 2005-03-14
Supplement: supp [file elife-65998-supp-v1.zip › elife_poa_e65998_Figure_6_source_data_3.csv]

	exp	animal	laserOn	peak_theta
1	main-effect	GD	0	7.52504577152681
2	main-effect	GD	1	8.208636882582
3	main-effect	GD	0	8.08680236398407
4	main-effect	GD	1	8.18181890478807
5	main-effect	BS	0	6.46231887965032
6	main-effect	BS	1	6.36476883009967
7	main-effect	BS	0	7.84809770348755
8	main-effect	BS	1	6.78301617927462
9	main-effect	BS	0	6.53154736201553
10	main-effect	BS	1	6.26158093095508
11	main-effect	BS	0	8.08179971274825
12	main-effect	BS	1	6.38000184999491
13	main-effect	BS	0	8.24583526833477
14	main-effect	BS	1	7.13534719910165
15	main-effect	BS	0	7.2980927249324
16	main-effect	BS	1	8.04283961733915
17	main-effect	GD	0	8.62856551328635
18	main-effect	GD	0	6.08417710734355
19	main-effect	GD	1	7.41159567757576
20	main-effect	GD	0	8.05996004136201
21	main-effect	GD	1	5.87994786971805
22	main-effect	GD	0	8.87717085054929
23	main-effect	GD	1	6.28524972263338
24	main-effect	GD	0	7.24050351637777
25	main-effect	GD	0	7.58665161020902
26	main-effect	GD	1	7.42918395792047
27	main-effect	GD	0	6.88703819325248
28	main-effect	GD	1	7.05513381691817
29	main-effect	GD	0	9.02298946071312
30	main-effect	GD	1	6.13512456888272
31	main-effect	PT	0	8.17273141381377
32	main-effect	PT	1	8.21568241729663
33	main-effect	PT	0	8.30435281290281
34	main-effect	PT	1	6.42130277060118
35	main-effect	PT	0	8.45590069987101
36	main-effect	PT	1	8.63758766957066
37	main-effect	PT	0	7.62245576184077
38	main-effect	PT	1	6.45145480196531
39	main-effect	PT	0	8.88524078611262
40	main-effect	PT	1	6.05898159320675
41	main-effect	PT	0	6.30847818668659
42	main-effect	PT	1	6.28213180738075
43	main-effect	PT	0	6.17327817287452
44	main-effect	PT	1	7.19157016289339
45	main-effect	PT	0	7.43319624768676
46	main-effect	PT	1	7.21461682343681
47	main-effect	PT	0	7.11900072735803
48	main-effect	PT	1	6.14822861053466
49	main-effect	BT	0	7.56117883612595
50	main-effect	BT	1	7.15720022559775
51	main-effect	BT	0	6.14306279033291
52	main-effect	BT	1	7.52507813554703
53	main-effect	OS	0	6.91492074871988
54	main-effect	OS	0	8.28256990395637
55	main-effect	OS	1	8.12717703930656
56	main-effect	OS	0	9.63282762693938
57	main-effect	OS	1	6.36950622990032
58	main-effect	OS	1	6.24602521573277
59	main-effect	OS	0	8.12779088918747
60	main-effect	OS	1	6.35688913411738
61	main-effect	OS	0	6.20603977368161
62	main-effect	OS	1	7.41327858269171
63	main-effect	OS	0	8.4703334541151
64	main-effect	OS	1	7.55504924239814
65	main-effect	OS	0	7.76374969879875
66	main-effect	OS	1	7.18044582282405
67	main-effect	BD	0	6.87642122587767
68	main-effect	BD	1	7.69234945400557
69	main-effect	BD	0	7.22712192659106
70	main-effect	BD	1	6.72264483598822
71	main-effect	BD	0	6.7519585386346
72	main-effect	BD	1	7.06366708702493
73	main-effect	BD	0	8.55169421852675
74	main-effect	BD	1	6.61903208795472
75	main-effect	BD	0	9.79539875721439
76	main-effect	BD	1	6.77614420489265
77	main-effect	BD	0	7.32853499375426
78	main-effect	BD	1	7.10039918181646
79	main-effect	BD	0	8.69827935309682
80	main-effect	BD	1	6.78254057859216
81	main-effect	BD	0	10.7571430889391
82	main-effect	BD	1	6.57984728347935
83	main-effect	BD	0	6.50270881309142
84	main-effect	BD	1	7.48124673919936
85	main-effect	BD	0	6.91486681149253
86	main-effect	BD	1	7.66850212664732
87	main-effect	BD	0	7.32186567072742
88	main-effect	BD	1	7.61069130991754
89	main-effect	BD	0	7.04672408527782
90	main-effect	BD	1	7.68205888414609
91	main-effect	BD	0	7.52502973447594
92	main-effect	BD	1	7.47664402018979
93	main-effect	BD	0	6.38638369965609
94	main-effect	BD	1	7.74481510727863
95	main-effect	BD	0	7.84653262225864
96	main-effect	BD	1	8.35343339043786
97	main-effect	BD	0	7.13597958904717
98	main-effect	BD	1	6.71765407132186
99	main-effect	BD	0	8.59355501465235
100	main-effect	BD	1	7.48804780459603
101	main-effect	BD	0	7.18503554319437
102	main-effect	BD	1	7.74044709272173
103	main-effect	BD	0	6.38932920389886
104	main-effect	BD	1	7.03969057740129
105	main-effect	BD	0	7.32051909784212
106	main-effect	BD	1	7.57088044899362
107	main-effect	BD	0	7.17857424423735
108	main-effect	BD	1	7.55430086211188
109	main-effect	BD	0	7.84650347656844
110	main-effect	BD	1	6.77148305183992
111	main-effect	BD	0	6.45324747748126
112	main-effect	BD	1	7.46293383357372
113	main-effect	BD	0	7.14692634780201
114	main-effect	BD	1	7.9095386642566
115	main-effect	BD	0	7.84650612760196
116	main-effect	BD	1	7.61209673553617
117	main-effect	BR	0	7.76090306418853
118	main-effect	BR	1	7.33243338853867
119	main-effect	BR	0	9.14340677116409
120	main-effect	BR	1	6.61535585545014
121	main-effect	BR	0	6.0162933068242
122	main-effect	BR	1	7.15742473029469
123	main-effect	BR	0	6.93057649119084
124	main-effect	BR	1	6.42099573393443
125	main-effect	BR	0	6.91486759287655
126	main-effect	BR	1	7.25275030465638
127	main-effect	BR	0	8.23110489901613
128	main-effect	BR	1	7.12446527356044
129	main-effect	TL	0	6.78422950165667
130	main-effect	TL	0	9.85573926466222
131	main-effect	TL	1	7.27052961174802
132	main-effect	TL	0	10.3724639104513
133	main-effect	TL	1	7.45017240452354
134	main-effect	TL	0	9.97797367173936
135	main-effect	TL	1	7.20137586064595
136	main-effect	TL	0	7.73063101324863
137	main-effect	TL	0	10.2943986614233
138	main-effect	TL	1	7.29021724639739
139	main-effect	TL	0	9.06244107545022
140	main-effect	TL	1	7.54906992616078
141	main-effect	TL	0	11.3916856151464
142	main-effect	TL	1	7.37957002349973
143	main-effect	TL	0	6.87888165770663
144	main-effect	TL	1	6.31954143488448
145	main-effect	TL	0	6.94174337716327
146	main-effect	TL	1	6.97276886110338
147	main-effect	TL	0	6.3847537189565
148	main-effect	BR	0	8.57299404917331
149	main-effect	BR	0	7.21460191685125
150	main-effect	BR	1	6.19953314574201
151	main-effect	BR	0	8.19125756289564
152	main-effect	BR	1	7.21460198214857
153	main-effect	BR	0	7.92843447449638
154	main-effect	BR	1	6.34266788253255
155	main-effect	BR	0	8.21645523367092
156	main-effect	BR	1	7.14680432927813
157	main-effect	TL	0	9.04534780478519
158	main-effect	TL	1	6.15873610598412
159	main-effect	TL	0	8.15899023300526
160	main-effect	TL	1	7.2746240082216
161	main-effect	TL	0	7.21460286862654
162	main-effect	TL	1	6.22343685670208
163	main-effect	TL	0	5.90629378211436
164	main-effect	TL	0	7.75466363653246
165	main-effect	TL	1	7.69169436192904
166	main-effect	TL	0	10.7195764083445
167	main-effect	TL	1	6.2516386779762
168	main-effect	TL	0	7.81882386823739
169	main-effect	TL	1	7.07421074277842
170	main-effect	TL	0	7.12075702997591
171	main-effect	TL	1	7.02021672503541
172	main-effect	TL	0	NA
173	main-effect	TL	1	5.9624050036125
174	main-effect	TL	0	8.42856280343113
175	main-effect	TL	1	6.82967567937637
176	gfp-control	GD	1	7.21168008291381
177	gfp-control	GD	0	8.55510256396005
178	gfp-control	GD	1	7.3839450482424
179	gfp-control	GD	0	8.23513590722172
180	gfp-control	GD	1	7.58611065672055
181	gfp-control	GD	0	8.42664041089724
182	gfp-control	GD	1	6.08273117978147
183	gfp-control	GD	0	8.93384684397801
184	gfp-control	GD	1	7.60619312248851
185	gfp-control	GD	0	8.31801311913744
186	gfp-control	GD	1	8.07651139126281
187	gfp-control	GD	0	7.15969583037852
188	gfp-control	GD	0	8.49501497776982
189	gfp-control	GD	1	7.75856851297989
190	gfp-control	GD	0	8.05353483578231
191	gfp-control	GD	1	6.53064663884568
192	gfp-control	GD	0	8.2599636261248
193	gfp-control	GD	0	7.89842788758586
194	gfp-control	GD	1	6.73184091899833
195	gfp-control	GD	0	6.58396571892695
196	gfp-control	GD	1	7.52501461979298
197	gfp-control	GD	1	6.79004178077219
198	gfp-control	GD	0	8.3155914949519
199	gfp-control	GD	1	7.38616908123556
200	gfp-control	GD	1	8.58367329170871
201	gfp-control	GD	0	6.62702940089305
202	gfp-control	GD	0	7.96445016983249
203	gfp-control	GD	1	6.34596981473321
204	gfp-control	GD	0	8.04934307557603
205	gfp-control	GD	1	7.16161109795476
206	gfp-control	GD	0	7.10645866904912
207	gfp-control	GD	1	7.08701336978682
208	gfp-control	GD	0	7.47679324468234
209	gfp-control	GD	1	7.99643978406288
210	gfp-control	GD	0	9.21782809014396
211	gfp-control	GD	1	7.19517421587057
212	gfp-control	GD	0	8.320637200452
213	gfp-control	GD	1	7.6346567581486
214	gfp-control	OS	0	9.5863346206128
215	gfp-control	OS	1	6.62544097021263
216	gfp-control	OS	0	7.31863552120668
217	gfp-control	OS	1	6.91486681144036
218	gfp-control	OS	0	6.89290102580038
219	gfp-control	OS	1	8.52977093716756
220	gfp-control	OS	0	8.03777097329056
221	gfp-control	OS	1	6.96477903367316
222	gfp-control	OS	0	9.25104117965417
223	gfp-control	OS	1	8.65864845211742
224	gfp-control	OS	0	7.52501350644455
225	gfp-control	OS	1	6.31922430446647
226	gfp-control	OS	0	6.84841117449399
227	gfp-control	OS	1	6.97786268472792
228	gfp-control	OS	0	7.35721131504557
229	gfp-control	OS	1	7.22329485697891
230	gfp-control	OS	0	6.46401688626028
231	gfp-control	OS	1	7.95105085575775
232	gfp-control	OS	0	8.49090153537055
233	gfp-control	OS	0	7.48449033038719
234	gfp-control	OS	1	7.52508344258109
235	gfp-control	OS	0	11.3866159201187
236	gfp-control	OS	1	8.20298250905612
237	gfp-control	OS	0	9.61919216845904
238	gfp-control	OS	1	6.62760501890795
239	gfp-control	OS	0	8.8114095159052
240	gfp-control	OS	0	8.84622326312724
241	gfp-control	OS	1	11.1477143898286
242	gfp-control	OS	0	7.29877772614886
243	gfp-control	OS	1	8.33129164154271
244	gfp-control	OS	0	7.75909592034682
245	gfp-control	OS	1	7.90860634203439
246	gfp-control	OS	0	7.04732109903565
247	gfp-control	OS	1	6.34596981031845
248	gfp-control	OS	0	10.0099042231888
249	gfp-control	OS	1	6.65388409027292
250	gfp-control	OS	0	9.10536201294019
251	gfp-control	OS	1	8.03110044903701
252	gfp-control	OS	0	7.38958021474134
253	gfp-control	OS	1	7.99479192480386
254	gfp-control	OS	0	8.96053406228204
255	gfp-control	OS	1	7.67095517817437
256	gfp-control	OS	0	7.84092341704932
257	gfp-control	OS	1	7.5024154594015
258	gfp-control	OS	0	8.32246540271729
259	gfp-control	OS	1	7.81812451283031
260	gfp-control	OS	0	8.20501263302149
261	gfp-control	OS	1	7.86032436958874
262	gfp-control	OS	0	6.63124741966324
263	gfp-control	OS	1	10.5624018579954
264	gfp-control	OS	0	6.24578550562625
265	gfp-control	OS	1	7.80586133367533
266	gfp-control	OS	0	8.75680265029281
267	gfp-control	OS	1	6.8456388375768
268	gfp-control	OS	0	6.16082160592331
269	gfp-control	OS	1	11.1124723097426
270	gfp-control	OS	0	7.85233305372674
271	gfp-control	OS	1	8.26468886297331
272	gfp-control	OS	0	8.04340105654476
273	gfp-control	OS	1	7.38367446623998
274	gfp-control	OS	0	7.65766966340914
275	gfp-control	OS	1	9.32770583435628
276	gfp-control	OS	0	6.31717140206556
277	gfp-control	OS	1	8.51014822810561
278	gfp-control	OS	0	9.62355772009516
279	gfp-control	OS	1	7.63981636923478
280	gfp-control	OS	0	6.30414700164556
281	gfp-control	OS	1	9.23875191847519
282	gfp-control	OS	0	5.87056832482464
283	gfp-control	OS	1	7.75506439371236
284	gfp-control	OS	0	8.98175594133098
285	gfp-control	OS	1	7.9639313737123
286	gfp-control	OS	0	7.60485407239357
287	gfp-control	OS	1	6.98477786494409
288	gfp-control	OS	0	7.22410830478796
289	gfp-control	OS	1	10.3597191735938
290	gfp-control	GD	0	7.74796633902369
291	gfp-control	GD	1	7.19009874241703
292	gfp-control	GD	0	8.21534173004591
293	gfp-control	GD	1	7.42083603408958
294	gfp-control	GD	0	7.95083103384925
295	gfp-control	GD	1	7.47683881913365
296	gfp-control	GD	0	7.83006140550792
297	gfp-control	GD	1	8.05626431971493
298	gfp-control	GD	0	6.36754399024677
299	gfp-control	GD	1	7.77606598957167
300	gfp-control	GD	0	7.65470897486116
301	gfp-control	GD	1	7.72094414963994
302	gfp-control	GD	0	8.18897215715257
303	gfp-control	GD	1	8.01713815797207
304	gfp-control	GD	0	8.53266102491482
305	gfp-control	GD	1	6.25633012131761
306	gfp-control	GD	0	7.21461504729165
307	gfp-control	GD	1	8.12058879865463
308	gfp-control	GD	0	7.90803848835918
309	gfp-control	GD	1	7.39102023336163
310	gfp-control	GD	0	8.85795629178386
311	gfp-control	GD	1	9.10767798618782
312	gfp-control	GD	0	8.3930004794647
313	gfp-control	GD	1	6.56675226342055
314	gfp-control	GD	0	8.21614426781909
315	gfp-control	GD	1	8.104258170486
316	gfp-control	GD	0	8.12292445708264
317	gfp-control	GD	1	7.92351901700925
318	gfp-control	GD	0	9.15128714111323
319	gfp-control	GD	1	7.8766181564367
320	gfp-control	GD	0	6.57736287014266
321	gfp-control	GD	1	6.82746736285817
322	gfp-control	GD	0	6.8230486197322
323	gfp-control	GD	1	8.87641808943077
324	gfp-control	GD	0	7.77228772649996
325	gfp-control	GD	1	7.47586021930659
326	gfp-control	GD	0	8.09964666729604
327	gfp-control	GD	1	6.86389627481017
328	gfp-control	GD	0	7.52910240415882
329	gfp-control	GD	1	7.71265361544368
330	gfp-control	GD	0	7.52350781630916
331	gfp-control	GD	1	6.96114353302433
332	gfp-control	GD	0	7.79153066246527
333	gfp-control	GD	1	8.08758311255893
334	gfp-control	GD	0	6.75166226049907
335	gfp-control	GD	1	8.24271402433966
336	gfp-control	GD	0	6.96969164143249
337	gfp-control	GD	1	7.19099329312577
338	gfp-control	GD	0	8.23847478612141
339	gfp-control	GD	1	7.73108066732535
340	gfp-control	GD	0	9.0647206314709
341	gfp-control	GD	1	6.32310026739154
342	gfp-control	GD	0	6.48362987949088
343	gfp-control	GD	1	7.0741785343468
344	gfp-control	GD	0	7.33928577020699
345	gfp-control	GD	1	7.40693134409604
346	gfp-control	GD	0	7.6725918826924
347	gfp-control	GD	1	8.33916739423795
348	gfp-control	GD	0	6.70803326784317
349	gfp-control	GD	1	7.24277251530486
350	gfp-control	GD	0	7.65748513229079
351	gfp-control	GD	1	7.77425289282429
352	gfp-control	GD	0	6.21466151471582
353	gfp-control	GD	1	6.72659996564519
354	gfp-control	GD	0	7.11086364465187
355	gfp-control	GD	1	7.39524801352588
356	gfp-control	GD	0	8.46575781674974
357	gfp-control	GD	1	6.72506367211015
358	gfp-control	GD	0	7.84652219934651
359	gfp-control	GD	1	7.21576816864111
360	gfp-control	GD	0	6.74471948863446
361	gfp-control	GD	1	6.35259673007437
362	gfp-control	GD	0	8.52523131589026
363	gfp-control	GD	1	7.15610725374196
364	gfp-control	GD	0	7.84664730217159
365	gfp-control	GD	1	7.01418541174059
366	gfp-control	GD	0	7.45767501281648
367	gfp-control	GD	1	8.99400208522306
368	gfp-control	GD	0	6.27904239333636
369	gfp-control	GD	1	7.80430287314932
