# Supplementary material for: Make Friends With The Googlebot
Source: eLife journal article supplement (doi:10.7554/elife.65998), 2005-03-14
Supplement: supp [file elife-65998-supp-v1.zip › elife_poa_e65998_Figure_6_source_data_4.csv]

	exp	animal	laserOn	pow_slow_gamma
1	main-effect	GD	0	0.176875856432984
2	main-effect	GD	1	0.239392384188323
3	main-effect	GD	0	0.23506568822974
4	main-effect	GD	1	0.323719178423175
5	main-effect	BS	0	0.227344388229183
6	main-effect	BS	1	0.478717023345282
7	main-effect	BS	1	0.435329663350715
8	main-effect	BS	0	0.287856763096189
9	main-effect	BS	1	0.620836217221257
10	main-effect	BS	0	0.217695474989599
11	main-effect	BS	1	0.418397898967971
12	main-effect	BS	1	0.505362831103088
13	main-effect	BS	1	0.408673462792009
14	main-effect	GD	0	0.125751126061851
15	main-effect	GD	0	0.274309639650967
16	main-effect	GD	1	0.338723786839155
17	main-effect	GD	0	0.185053710487928
18	main-effect	GD	1	0.315160409342393
19	main-effect	GD	0	0.289955005786336
20	main-effect	GD	1	0.424859144683439
21	main-effect	GD	0	0.259039662259953
22	main-effect	GD	0	0.13831847487263
23	main-effect	GD	1	0.356180855102854
24	main-effect	GD	0	0.158771884345191
25	main-effect	GD	1	0.292967875356076
26	main-effect	GD	1	0.424156679980409
27	main-effect	PT	0	0.122470233226737
28	main-effect	PT	1	0.231215497331959
29	main-effect	PT	1	0.262720569835488
30	main-effect	PT	0	0.178375478526045
31	main-effect	PT	1	0.181835591553352
32	main-effect	PT	0	0.161819856843127
33	main-effect	PT	1	0.295782330956513
34	main-effect	PT	0	0.124520788153957
35	main-effect	PT	1	0.288133886727112
36	main-effect	PT	0	0.355424267289125
37	main-effect	PT	1	0.281214630884881
38	main-effect	PT	0	0.165486440638023
39	main-effect	PT	1	0.226956073020521
40	main-effect	PT	1	0.321410588594138
41	main-effect	PT	0	0.287265690445661
42	main-effect	PT	1	0.387788456878922
43	main-effect	BT	0	0.129026618267439
44	main-effect	BT	1	0.408220616222095
45	main-effect	BT	0	0.144064061699154
46	main-effect	BT	1	0.421864417418955
47	main-effect	OS	0	0.223691758375322
48	main-effect	OS	0	0.179745759240543
49	main-effect	OS	1	0.402577017537373
50	main-effect	OS	0	0.204067698393296
51	main-effect	OS	1	0.170572664627777
52	main-effect	OS	1	0.448974813808785
53	main-effect	OS	0	0.150378357063168
54	main-effect	OS	1	0.441347453323282
55	main-effect	OS	0	0.253051233425177
56	main-effect	OS	1	0.454920857110906
57	main-effect	OS	0	0.17251550396752
58	main-effect	OS	1	0.246413765073946
59	main-effect	OS	0	0.123883797225225
60	main-effect	OS	1	0.386706550274433
61	main-effect	BD	0	0.309878792889356
62	main-effect	BD	1	0.472736785015207
63	main-effect	BD	0	0.40173405981799
64	main-effect	BD	0	0.551236207943496
65	main-effect	BD	1	0.549490900865082
66	main-effect	BD	0	0.392314159962777
67	main-effect	BD	1	0.440783732653274
68	main-effect	BD	0	0.339336344770693
69	main-effect	BD	1	0.371645481187655
70	main-effect	BD	0	0.340596963198574
71	main-effect	BD	1	0.626006603972313
72	main-effect	BD	0	0.172633122768363
73	main-effect	BD	1	0.314525289670703
74	main-effect	BD	0	0.283038716701244
75	main-effect	BD	1	0.450520385901845
76	main-effect	BD	0	0.321899761933249
77	main-effect	BD	1	0.399908886025023
78	main-effect	BD	0	0.298657612421874
79	main-effect	BD	1	0.269775308250725
80	main-effect	BD	0	0.21036922361975
81	main-effect	BD	1	0.385092170237473
82	main-effect	BD	0	0.242644450820282
83	main-effect	BD	1	0.31539795729286
84	main-effect	BD	1	0.322730226700372
85	main-effect	BD	0	0.258778479680897
86	main-effect	BD	1	0.367317377059512
87	main-effect	BD	0	0.361614510223012
88	main-effect	BD	1	0.427762588461267
89	main-effect	BD	0	0.177866621252455
90	main-effect	BD	1	0.38449857910237
91	main-effect	BD	0	0.168152123563501
92	main-effect	BD	1	0.313978480258943
93	main-effect	BD	0	0.380787268409541
94	main-effect	BD	1	0.316381188290232
95	main-effect	BD	0	0.3094832918592
96	main-effect	BD	1	0.512936535091595
97	main-effect	BD	0	0.140619048434099
98	main-effect	BD	1	0.415937680443237
99	main-effect	BD	0	0.242279418950504
100	main-effect	BD	1	0.347626288219225
101	main-effect	BD	0	0.252201977055692
102	main-effect	BD	1	0.649755652730975
103	main-effect	BD	0	0.207547566565739
104	main-effect	BD	1	0.323440647990345
105	main-effect	BD	0	0.42100374861853
106	main-effect	BR	0	0.192502752541003
107	main-effect	BR	1	0.354170827488421
108	main-effect	BR	0	0.234727575730473
109	main-effect	BR	1	0.244502619963614
110	main-effect	BR	0	0.24845330284673
111	main-effect	BR	1	0.212716465974959
112	main-effect	BR	0	0.224894108406231
113	main-effect	BR	1	0.288263641799061
114	main-effect	BR	0	0.240371691932238
115	main-effect	BR	1	0.274403037371914
116	main-effect	BR	0	0.220356582977516
117	main-effect	BR	1	0.323023982013039
118	main-effect	TL	0	0.162472323638092
119	main-effect	TL	0	0.302442499180443
120	main-effect	TL	1	0.386684665461744
121	main-effect	TL	0	0.237386780839303
122	main-effect	TL	1	0.323477673741823
123	main-effect	TL	0	0.230445267282665
124	main-effect	TL	1	0.357966056794146
125	main-effect	TL	0	0.237710262402833
126	main-effect	TL	0	0.251535795377334
127	main-effect	TL	1	0.417852886673174
128	main-effect	TL	0	0.300168194973834
129	main-effect	TL	1	0.377796350883218
130	main-effect	TL	0	0.212817824674222
131	main-effect	TL	1	0.304027274314822
132	main-effect	TL	0	0.272845628122043
133	main-effect	TL	1	0.359021412988446
134	main-effect	TL	0	0.225246547053934
135	main-effect	TL	1	0.301650798640758
136	main-effect	TL	0	0.214246243837299
137	main-effect	BR	0	0.129009706083868
138	main-effect	BR	0	0.140847967245884
139	main-effect	BR	1	0.240737991978203
140	main-effect	BR	0	0.17377210601284
141	main-effect	BR	1	0.289348031094289
142	main-effect	BR	0	0.190555605713464
143	main-effect	BR	1	0.232922074142078
144	main-effect	BR	0	0.236496908944225
145	main-effect	BR	1	0.424659641247501
146	main-effect	TL	0	0.315683684569374
147	main-effect	TL	1	0.378188961580434
148	main-effect	TL	0	0.26077776163849
149	main-effect	TL	1	0.313473207069696
150	main-effect	TL	0	0.296151598065198
151	main-effect	TL	1	0.417595675603936
152	main-effect	TL	0	0.300048525612601
153	main-effect	TL	0	0.214172967196637
154	main-effect	TL	1	0.440660529658172
155	main-effect	TL	0	0.272929545913133
156	main-effect	TL	1	0.448833994770473
157	main-effect	TL	0	0.268942247684359
158	main-effect	TL	1	0.337023516618205
159	main-effect	TL	0	0.452346549761524
160	main-effect	TL	1	0.485997284628583
161	main-effect	TL	0	0.252653847994668
162	main-effect	TL	1	0.44864524010134
163	main-effect	TL	0	0.237646086545576
164	main-effect	TL	1	0.419214548773478
165	gfp-control	GD	1	0.248345466891058
166	gfp-control	GD	1	0.259791575787154
167	gfp-control	GD	1	0.127783964379875
168	gfp-control	GD	1	0.213305285474025
169	gfp-control	GD	0	0.23443973511881
170	gfp-control	GD	0	0.222030354982826
171	gfp-control	GD	0	0.205839825047004
172	gfp-control	GD	1	0.217644299951651
173	gfp-control	GD	0	0.124491837145451
174	gfp-control	GD	0	0.119652164467692
175	gfp-control	GD	0	0.218172065451331
176	gfp-control	GD	1	0.143590780441806
177	gfp-control	GD	1	0.615501874899428
178	gfp-control	GD	0	0.184231677088863
179	gfp-control	GD	1	0.255696301487951
180	gfp-control	GD	1	0.186479782589038
181	gfp-control	GD	0	0.147969999711115
182	gfp-control	GD	0	0.24303884321694
183	gfp-control	GD	1	0.167863602399687
184	gfp-control	GD	1	0.136155013136192
185	gfp-control	GD	0	0.189044960041143
186	gfp-control	GD	0	0.161468942647119
187	gfp-control	GD	1	0.244012572904941
188	gfp-control	GD	0	0.184823984424181
189	gfp-control	GD	1	0.252512188720235
190	gfp-control	GD	0	0.176358075162653
191	gfp-control	GD	1	0.241733606782362
192	gfp-control	OS	0	0.172353068284774
193	gfp-control	OS	1	0.128193234340647
194	gfp-control	OS	0	0.0582566509823508
195	gfp-control	OS	1	0.229476408397038
196	gfp-control	OS	0	0.134348548054936
197	gfp-control	OS	1	0.105981984430474
198	gfp-control	OS	0	0.175163002916584
199	gfp-control	OS	1	0.220579212737018
200	gfp-control	OS	0	0.158103674230511
201	gfp-control	OS	1	0.142594083378111
202	gfp-control	OS	0	0.191304337191413
203	gfp-control	OS	1	0.200525993393504
204	gfp-control	OS	1	0.139152278737333
205	gfp-control	OS	0	0.171020018235296
206	gfp-control	OS	1	0.22215179872139
207	gfp-control	OS	0	0.174908494605947
208	gfp-control	OS	1	0.0549109366268956
209	gfp-control	OS	0	0.140670235519026
210	gfp-control	OS	0	0.212056970657891
211	gfp-control	OS	1	0.293092941740101
212	gfp-control	OS	0	0.147653305104726
213	gfp-control	OS	1	0.221724942580428
214	gfp-control	OS	0	0.215950338510019
215	gfp-control	OS	1	0.170142442963121
216	gfp-control	OS	0	0.251986391010369
217	gfp-control	OS	0	0.122297854710965
218	gfp-control	OS	1	0.23236329843456
219	gfp-control	OS	0	0.156139064510596
220	gfp-control	OS	1	0.128406694761598
221	gfp-control	OS	0	0.103211485317369
222	gfp-control	OS	1	0.320123458282614
223	gfp-control	OS	0	0.235611556150415
224	gfp-control	OS	1	0.27160874186111
225	gfp-control	OS	0	0.208355385208475
226	gfp-control	OS	1	0.173624403009715
227	gfp-control	OS	0	0.19039407182669
228	gfp-control	OS	1	0.252630421642749
229	gfp-control	OS	0	0.128813201182201
230	gfp-control	OS	1	0.212246114532179
231	gfp-control	OS	0	0.215181633682064
232	gfp-control	OS	1	0.153993261275771
233	gfp-control	OS	0	0.216452423586526
234	gfp-control	OS	1	0.231323188610137
235	gfp-control	OS	0	0.142548455430809
236	gfp-control	OS	1	0.187364668834065
237	gfp-control	OS	1	0.101866633334498
238	gfp-control	OS	0	0.168795616413538
239	gfp-control	OS	1	0.182097931829903
240	gfp-control	OS	0	0.220821872252554
241	gfp-control	OS	1	0.13111921499184
242	gfp-control	OS	0	0.159509300757101
243	gfp-control	OS	1	0.157381508521956
244	gfp-control	OS	0	0.346109055602398
245	gfp-control	OS	1	0.214426626114786
246	gfp-control	OS	0	0.237445382685904
247	gfp-control	OS	1	0.293324030283927
248	gfp-control	OS	0	0.179378433260961
249	gfp-control	OS	1	0.145854072766339
250	gfp-control	OS	0	0.146084852093828
251	gfp-control	OS	1	0.0968804744725595
252	gfp-control	OS	0	0.103161135090025
253	gfp-control	OS	0	0.169342634533072
254	gfp-control	OS	1	0.163998390453247
255	gfp-control	OS	0	0.165764149925165
256	gfp-control	OS	1	0.189203764923944
257	gfp-control	OS	0	0.247155916471644
258	gfp-control	OS	1	0.332696253551218
259	gfp-control	OS	1	0.295926209130347
260	gfp-control	OS	0	0.423616321316201
261	gfp-control	OS	1	0.557495574095727
262	gfp-control	GD	0	0.252243295272571
263	gfp-control	GD	1	0.310823840606956
264	gfp-control	GD	0	0.202952716822801
265	gfp-control	GD	1	0.156013195746502
266	gfp-control	GD	0	0.259825760468035
267	gfp-control	GD	1	0.214996237693838
268	gfp-control	GD	0	0.244868183281102
269	gfp-control	GD	1	0.203027780807734
270	gfp-control	GD	0	0.256835962714571
271	gfp-control	GD	1	0.270033933806983
272	gfp-control	GD	0	0.22606538239383
273	gfp-control	GD	1	0.257076725935477
274	gfp-control	GD	0	0.239508985886008
275	gfp-control	GD	1	0.146352829900811
276	gfp-control	GD	0	0.619244881326349
277	gfp-control	GD	1	0.412039191562287
278	gfp-control	GD	0	0.178302992420062
279	gfp-control	GD	1	0.218446342311622
280	gfp-control	GD	0	0.25959686198363
281	gfp-control	GD	1	0.232287069461032
282	gfp-control	GD	0	0.195459263784421
283	gfp-control	GD	1	0.187667200827812
284	gfp-control	GD	0	0.259144107202581
285	gfp-control	GD	1	0.408247655140741
286	gfp-control	GD	0	0.264045793290175
287	gfp-control	GD	1	0.215317241147742
288	gfp-control	GD	1	0.299907116820857
289	gfp-control	GD	0	0.158424530024289
290	gfp-control	GD	1	0.178413708742404
291	gfp-control	GD	0	0.213263162467323
292	gfp-control	GD	1	0.582149727168083
293	gfp-control	GD	0	0.220455178514597
294	gfp-control	GD	1	0.201215577967536
295	gfp-control	GD	0	0.259247245009695
296	gfp-control	GD	1	0.408824528719545
297	gfp-control	GD	0	0.47419443105618
298	gfp-control	GD	1	0.486794658252405
299	gfp-control	GD	0	0.478081865571717
300	gfp-control	GD	1	0.590847018629939
301	gfp-control	GD	0	0.326271713286947
302	gfp-control	GD	1	0.230665987322669
303	gfp-control	GD	0	0.316379678276617
304	gfp-control	GD	1	0.137494095469317
305	gfp-control	GD	0	0.231449051777738
306	gfp-control	GD	1	0.247375834325068
307	gfp-control	GD	0	0.144411860297276
308	gfp-control	GD	1	0.342090940908302
309	gfp-control	GD	0	0.263309928817614
310	gfp-control	GD	1	0.2187586457503
311	gfp-control	GD	0	0.210099488911982
312	gfp-control	GD	1	0.326504591572698
313	gfp-control	GD	0	0.303785587751274
314	gfp-control	GD	1	0.202647337789196
315	gfp-control	GD	0	0.202782575230446
316	gfp-control	GD	1	0.130619229355347
317	gfp-control	GD	0	0.223536183657433
318	gfp-control	GD	1	0.315323847312791
319	gfp-control	GD	0	0.212440428908613
320	gfp-control	GD	1	0.488844895004187
321	gfp-control	GD	0	0.419279618015778
322	gfp-control	GD	1	0.494771641629526
323	gfp-control	GD	0	0.234147026016484
324	gfp-control	GD	1	0.351913114711294
325	gfp-control	GD	0	0.380561705001779
326	gfp-control	GD	1	0.555673953855569
327	gfp-control	GD	0	0.375840456234734
328	gfp-control	GD	1	0.548371314796321
329	gfp-control	GD	0	0.480598763853838
330	gfp-control	GD	1	0.421087792049963
331	gfp-control	GD	0	0.445806671290943
332	gfp-control	GD	1	0.429542568604281
333	gfp-control	GD	0	0.497958388239737
334	gfp-control	GD	1	0.271741331735658
335	gfp-control	GD	0	0.428313871940716
336	gfp-control	GD	1	0.445125515007606
337	gfp-control	GD	0	0.337182858761977
338	gfp-control	GD	1	0.440802826683177
339	gfp-control	GD	0	0.414581825792894
340	gfp-control	GD	1	0.397252272384678
