# Supplementary figures and images for: Make Friends With The Googlebot
Source: eLife journal article supplement (doi:10.7554/elife.65998), 2005-03-14

**Figure 3—figure supplement 1: PSD at Goal**

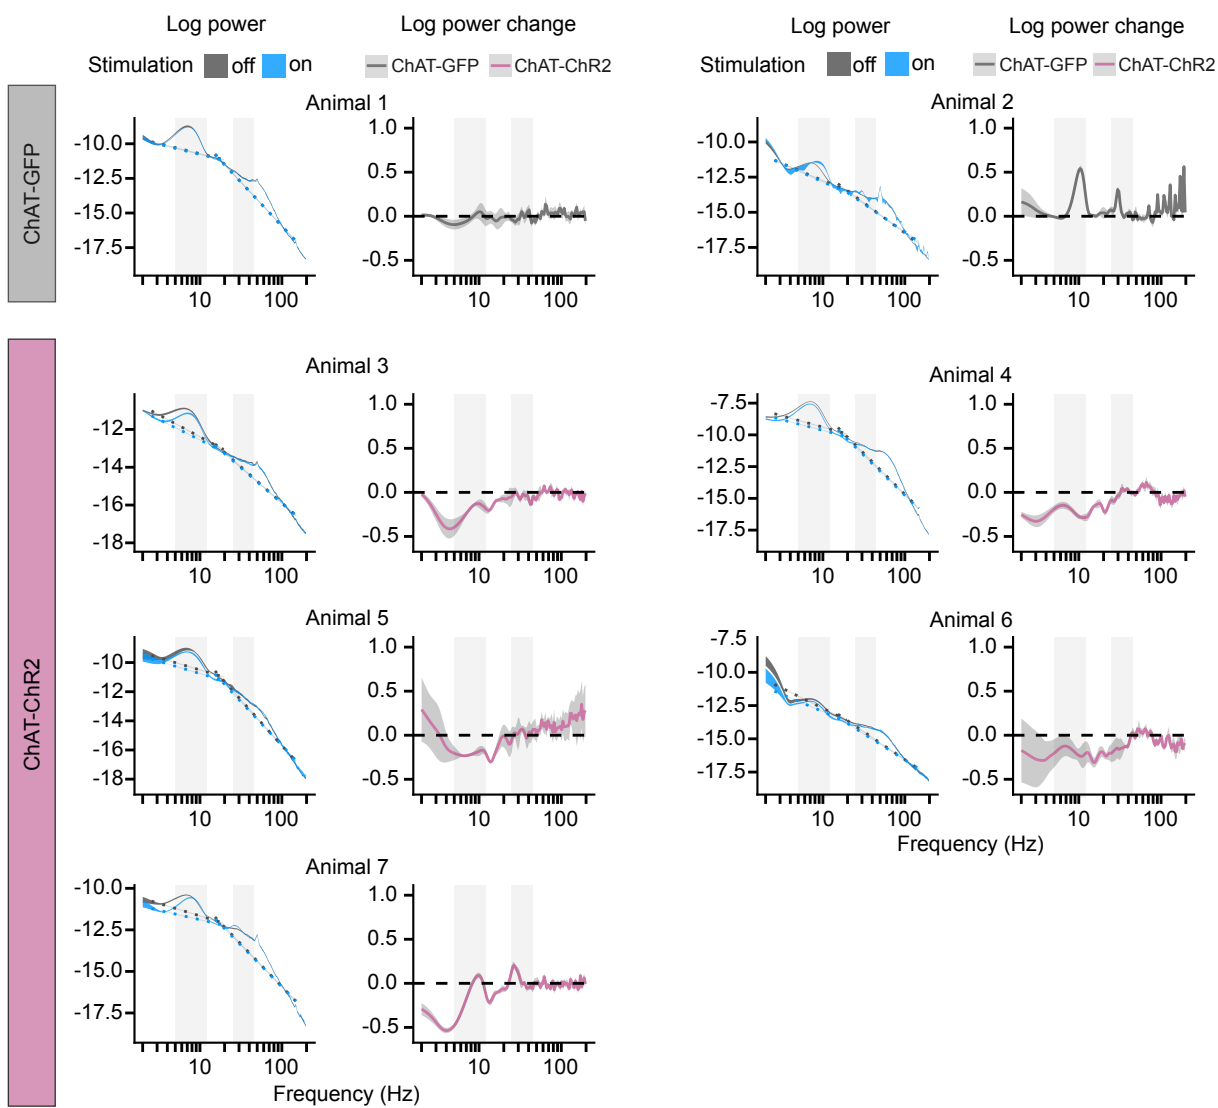

Supplement: supp [file elife-65998-supp-v1.zip]

Figure 2—figure supplement 1: Individual learning curves

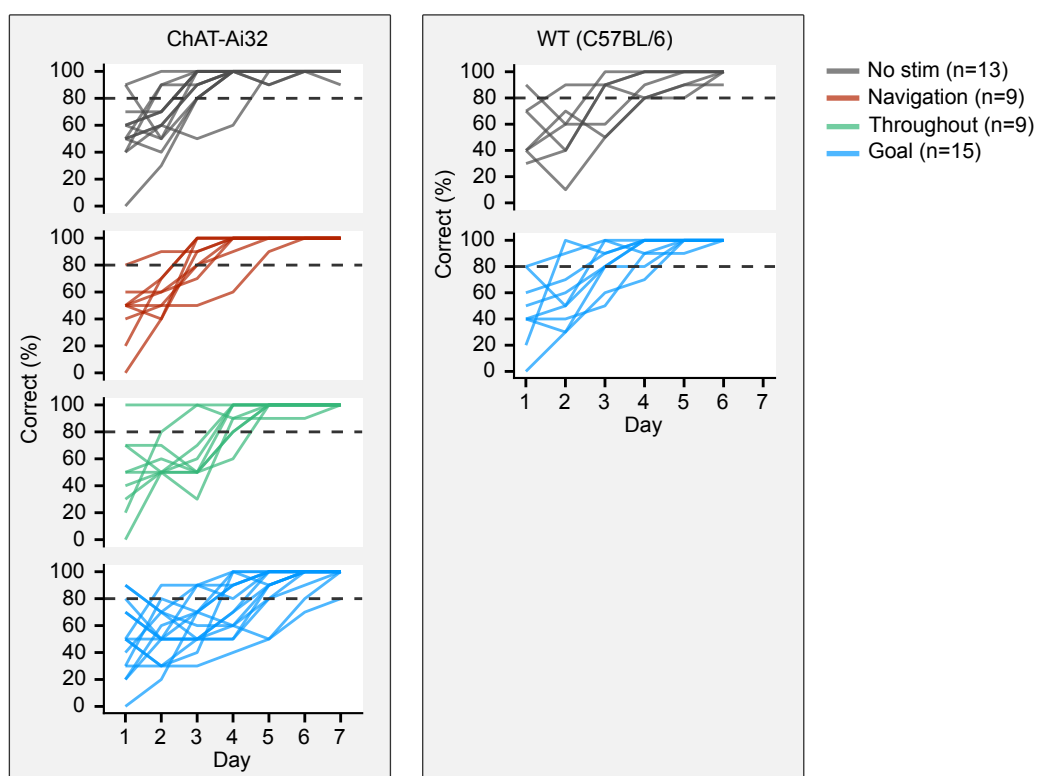

Supplement: supp [file elife-65998-supp-v1.zip › elife_poa_e65998_Figure_2_figure_supplement_1.pdf]

**Figure 3—figure supplement 2: PSD change per frequency band**

**A**

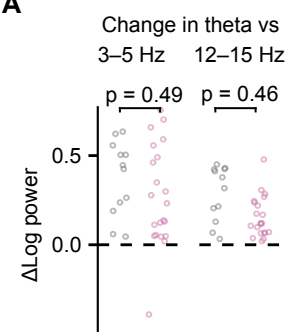

**B**

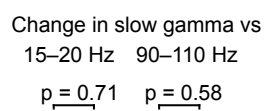

Supplement: supp [file elife-65998-supp-v1.zip › elife_poa_e65998_Figure_3_figure_supplement_2.pdf]

**Figure 4—figure supplement 1: SWRs recorded at Goal**

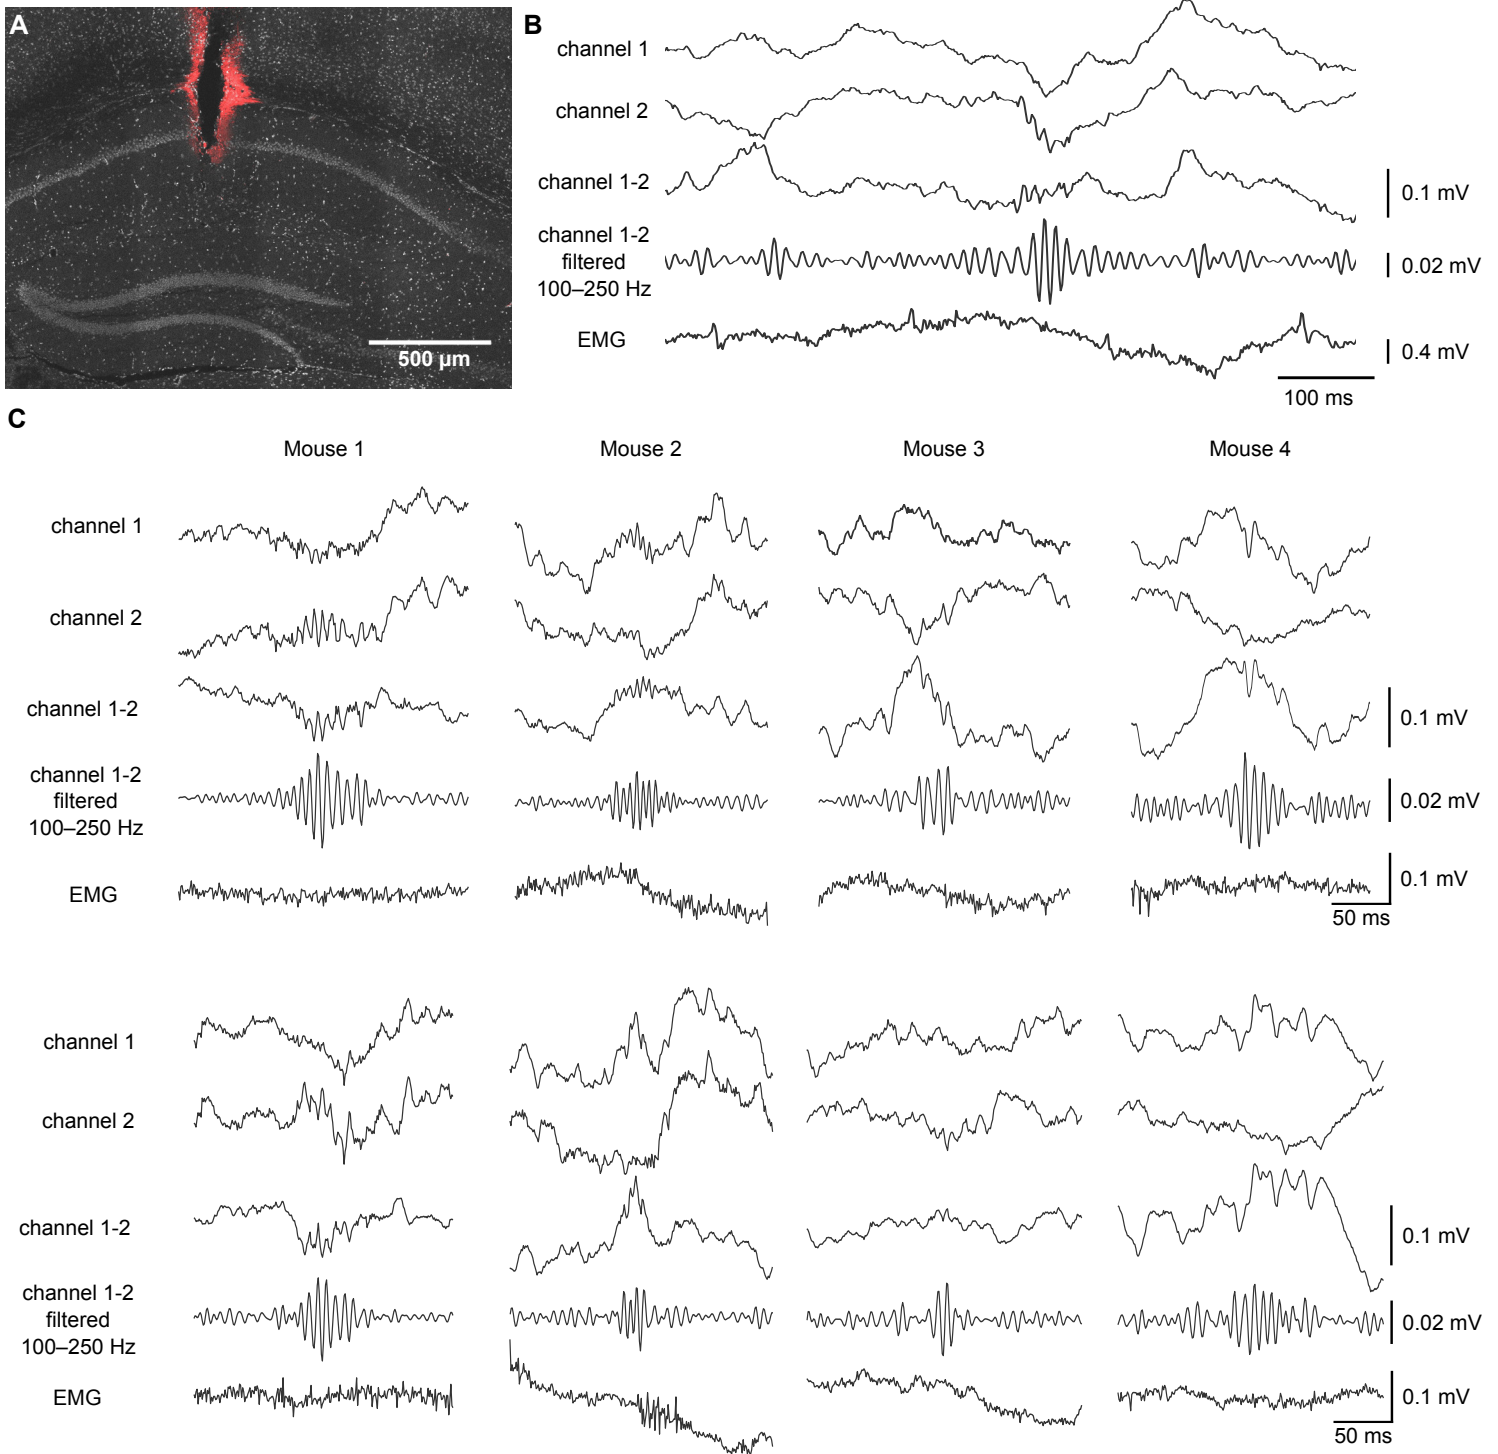

Supplement: supp [file elife-65998-supp-v1.zip › elife_poa_e65998_Figure_4_figure_supplement_1.pdf]

**Figure 4—figure supplement 2: Spectral peak frequency of ripples and duration of SWRs at Goal**

**A**

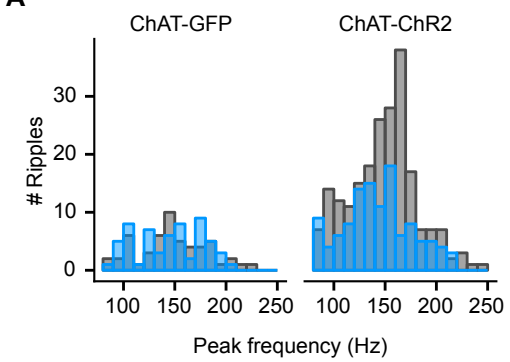

**B**

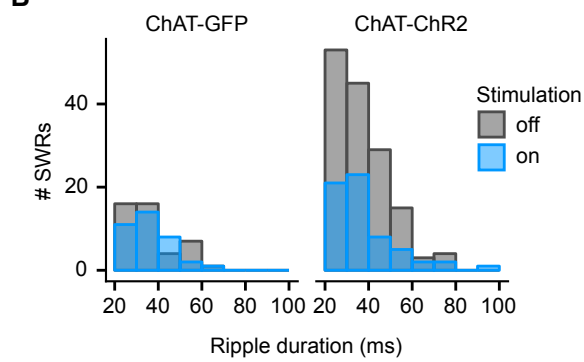

Supplement: supp [file elife-65998-supp-v1.zip › elife_poa_e65998_Figure_4_figure_supplement_2.pdf]

**Figure 3—figure supplement 1: SWRs recorded during sleep**

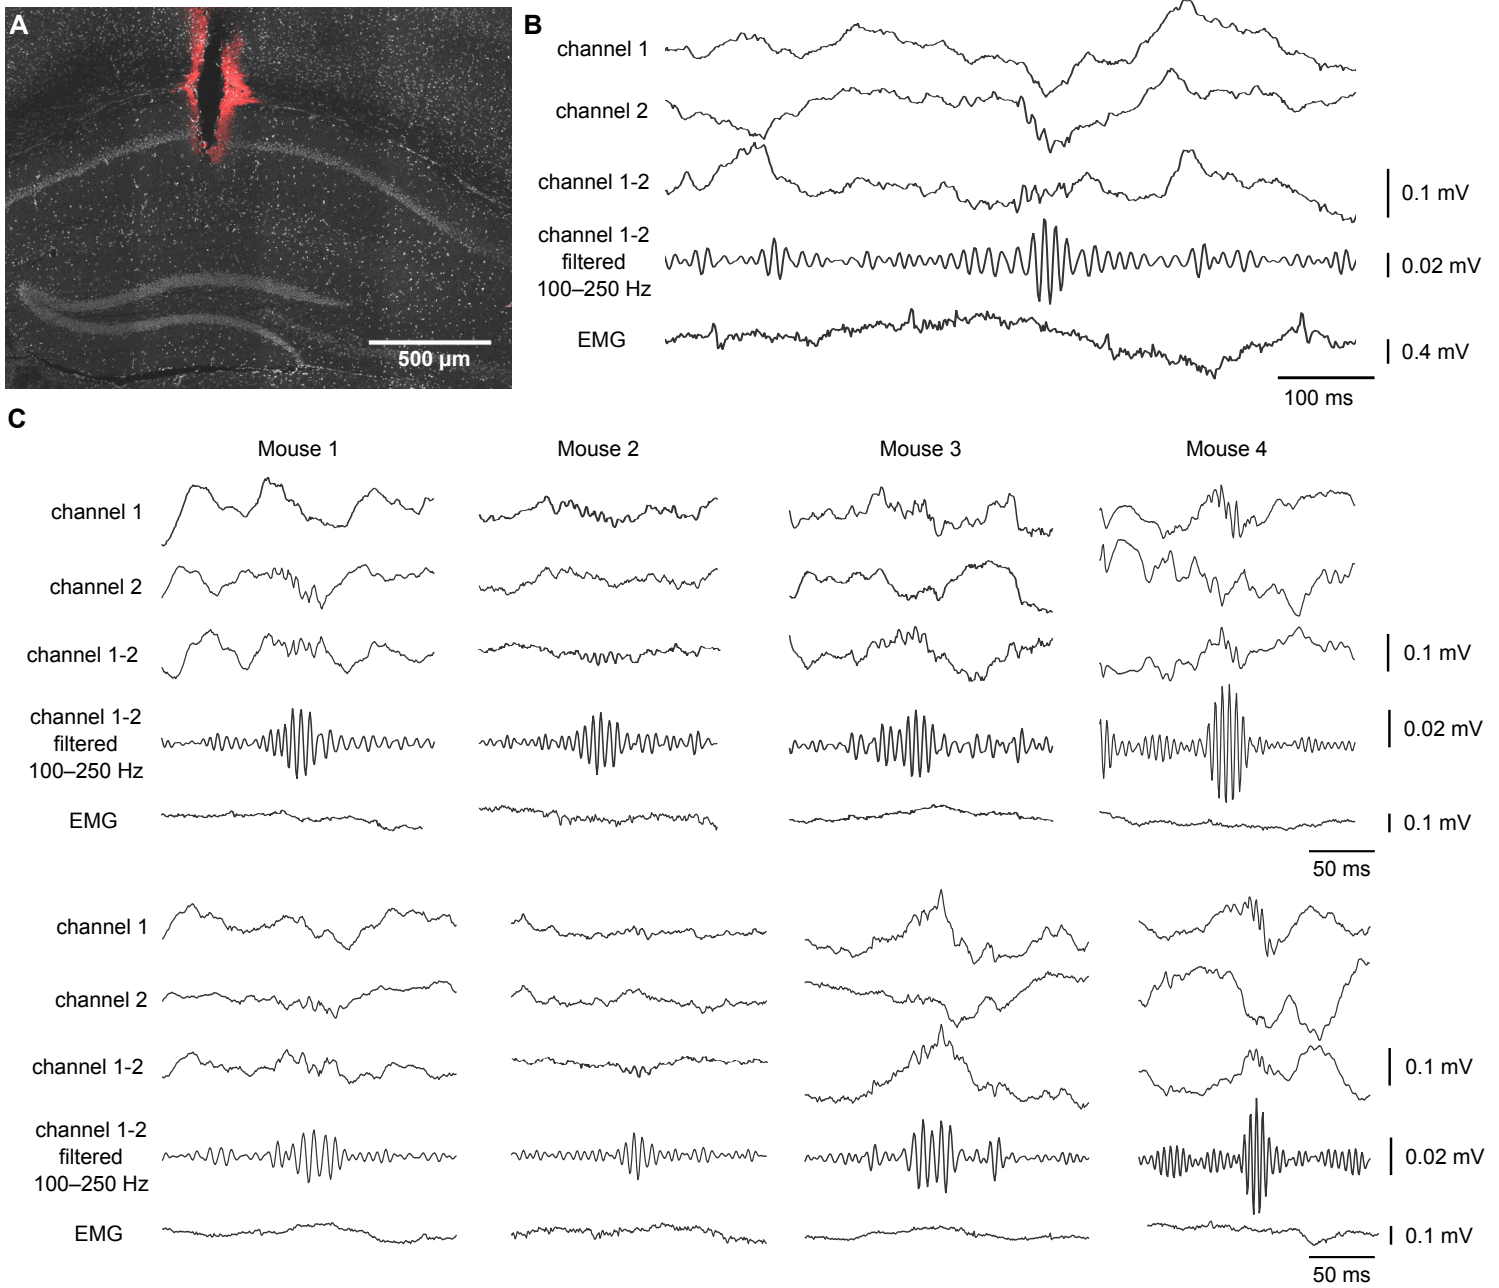

Supplement: supp [file elife-65998-supp-v1.zip › elife_poa_e65998_Figure_5_figure_supplement_2.pdf]

Figure 6—figure supplement 1: PSD of individual sleeping mice

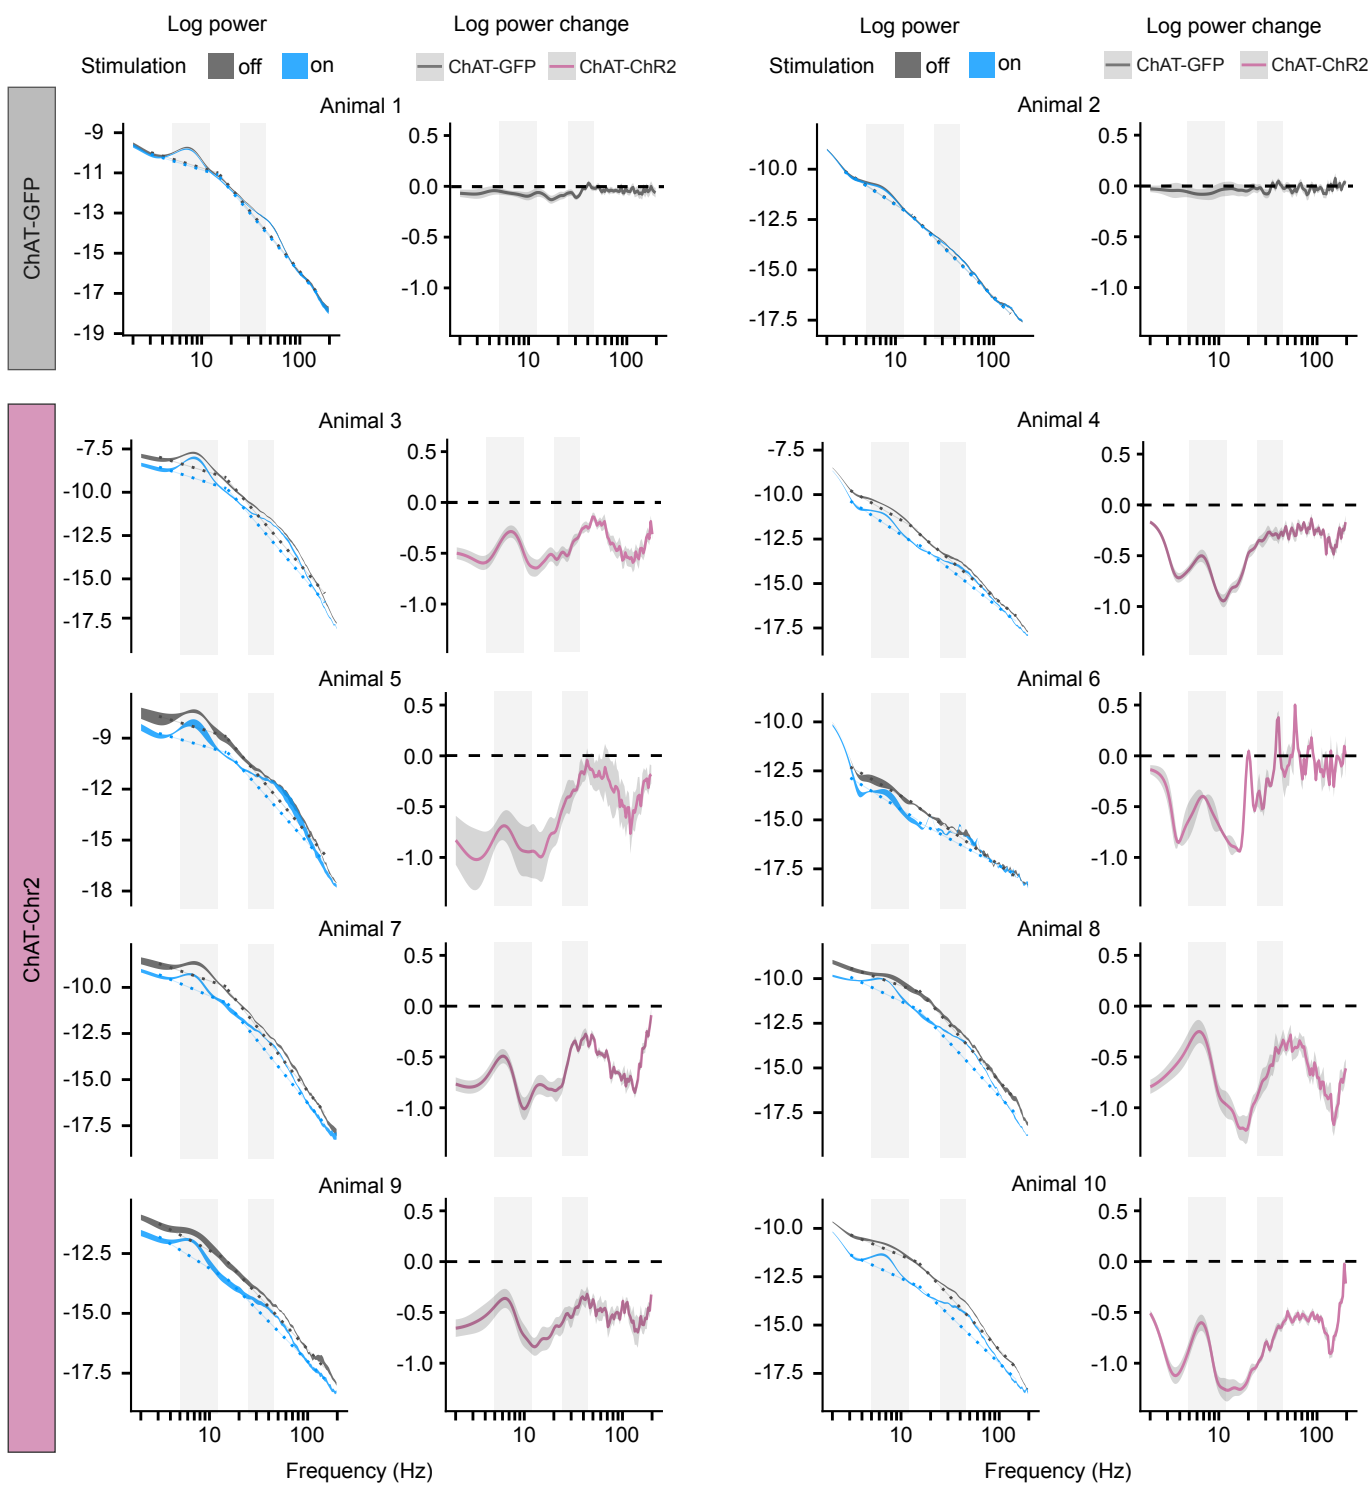

Supplement: supp [file elife-65998-supp-v1.zip › elife_poa_e65998_Figure_6_figure_supplement_1.pdf]

**Figure 6—figure supplement 2: PSD change per frequency band**

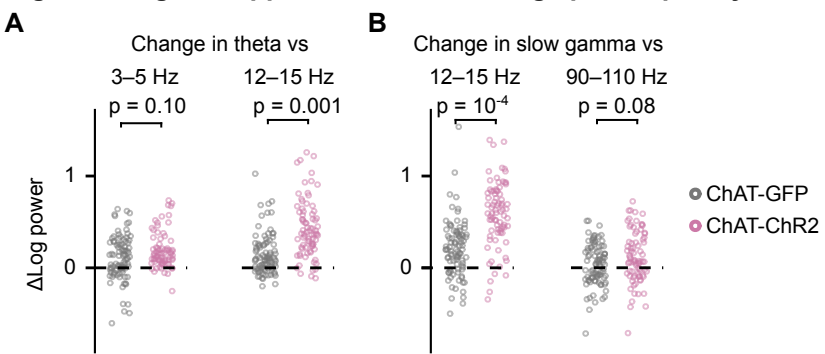

Supplement: supp [file elife-65998-supp-v1.zip › elife_poa_e65998_Figure_6_figure_supplement_2.pdf]
